# Supplementary material for: Identification of rare alternative splicing events in MS/MS data reveals a significant fraction of alternative translation initiation sites
Source: PeerJ. 2014 Nov 13;2:e673. doi: 10.7717/peerj.673 (PMC4232841; doi:10.7717/peerj.673)
Supplement: File S1 [file peerj-02-673-s001.xlsx]

## Sheet: peptides
Supplementary Files S1 - List containing all peptides identified by MaxQuant using a Splooce database merged with Uniprot
Sequence	Amino acid before	Length	Missed cleavages	Mass	Proteins	Leading razor protein	Unique (Groups)	Unique (Proteins)	Charges	PEP	Score	Intensity
AAAAAAAAAAAAAAAGAGAGAK	R	22	0	1595.84	sp|P55011-3|S12A2_HUMAN;sp|P55011|S12A2_HUMAN;tr|G3XAL9|G3XAL9_HUMAN	sp|P55011-3|S12A2_HUMAN	yes	no	2,3	2.6876e-22	118.72	177710000
AAAAAAAAAAGAAGGR	M	16	0	1197.62	sp|Q86U42-2|PABP2_HUMAN;sp|Q86U42|PABP2_HUMAN;NM_004643#(-s-:14_P6239964954336);NM_004643#(r:14_P3335023881440);NM_004643#(-s-:14_P9034438856783);NM_004643#(-s-s-:14_P6731430547580);NM_004643#(-s-s-:14_P7239795374498);NM_004643#(-s-s-s-:14_P6200720975678);NM_004643#(-s-:14_P7816119649016);NM_004643#(-s-s-:14_P1205518972180);NM_004643#(-s-s-s-s-:14_P3134735754152);NM_004643#(-s-:14_P3734865628274)…	sp|Q86U42-2|PABP2_HUMAN	yes	no	2	4.0611e-24	160.18	1415500000
AAAAAAAAAASGAAIPPLIPPR	R	22	0	1898.07	sp|O14654|IRS4_HUMAN	sp|O14654|IRS4_HUMAN	yes	yes	2	1.1342e-05	71.376	10870000
AAAAAAAAAPAAAATAPTTAATTAATAAQ	K	29	0	2367.2	sp|P37108|SRP14_HUMAN;tr|H0YLW0|H0YLW0_HUMAN	sp|P37108|SRP14_HUMAN	yes	no	3	8.7983e-11	79.935	144490000
AAAAAAAAAVSR	R	12	0	999.546	sp|Q96JP5-2|ZFP91_HUMAN;sp|Q96JP5|ZFP91_HUMAN	sp|Q96JP5-2|ZFP91_HUMAN	yes	no	2	2.03e-05	101.56	147520000
AAAAAAAGDSDSWDADAFSVEDPVRK	M	26	1	2592.17	NM_003758#(-t:15_E3824383615176);sp|O75822|EIF3J_HUMAN;tr|F5H425|F5H425_HUMAN	NM_003758#(-t:15_E3824383615176)	no	no	2,3	2.4319e-30	134.68	25387000
AAAAAAALESWQAAAPR	M	17	0	1624.83	NM_001013694#(r:22_S2832240888560);sp|Q9UH36|SRR1L_HUMAN	NM_001013694#(r:22_S2832240888560)	yes	no	2,3	1.5788e-17	119.45	25047000
AAAAAAALQAK	K	11	0	955.545	sp|P36578|RL4_HUMAN;NM_000968#(r:15_R2870063077921);NM_000968#(f-:15_R886591974770);NM_000968#(r:15_R7635005758227);NM_000968#(r:15_R6116696733344);NM_000968#(-t:15_R3982785077533);NM_000968#(-s-:15_R1052402022736);NM_000968#(-s-s-:15_R7568255917089);tr|H3BM89|H3BM89_HUMAN;NM_000968#(f-:15_R5529369440384);NM_000968#(r:15_R9443664123295);NM_000968#(-s-s-:15_R3424638300180);NM_000968#(-s-s-s-s-:15_…	sp|P36578|RL4_HUMAN	yes	no	2,3	1.4119e-11	166.07	10492000000
AAAAAAALQAKSDEK	K	15	1	1414.74	sp|P36578|RL4_HUMAN;NM_000968#(r:15_R2870063077921);NM_000968#(f-:15_R886591974770);NM_000968#(r:15_R7635005758227);NM_000968#(r:15_R6116696733344);NM_000968#(-t:15_R3982785077533);NM_000968#(-s-:15_R1052402022736);NM_000968#(-s-s-:15_R7568255917089);tr|H3BM89|H3BM89_HUMAN;NM_000968#(f-:15_R5529369440384);NM_000968#(r:15_R9443664123295);NM_000968#(-s-s-:15_R3424638300180);NM_000968#(-s-s-s-s-:15_…	sp|P36578|RL4_HUMAN	yes	no	3	1.0683e-06	95.067	11157000
AAAAAAAPSGGGGGGEEERLEEK	M	23	1	2083.98	sp|P51608-2|MECP2_HUMAN;NM_001110792#(r:X_M947858446505)	sp|P51608-2|MECP2_HUMAN	yes	no	3	1.5084e-05	99.11	1897700
AAAAAAAVAGVGR	M	13	0	1054.59	sp|Q9H3H3-2|CK068_HUMAN;tr|J3KQG9|J3KQG9_HUMAN;sp|Q9H3H3-3|CK068_HUMAN	sp|Q9H3H3-2|CK068_HUMAN	yes	no	2	0.00056681	74.611	4095100
AAAAAAAVGGQQPSQPELPAPGLALDK	M	27	0	2498.31	NM_172070#(-s-:2_U6841258008899);sp|Q6ZT12|UBR3_HUMAN;sp|Q6ZT12-4|UBR3_HUMAN;NM_172070#(-s-:2_U5808017523811)	NM_172070#(-s-:2_U6841258008899)	yes	no	3	0.0039498	53.998	9107700
AAAAAAGAASGLPGPVAQGLK	M	21	0	1747.96	sp|Q96P70|IPO9_HUMAN;NM_018085#(-s-s-:1_I9684104675369);NM_018085#(-s-:1_I27601807312);NM_018085#(-s-:1_I1444067505467)	sp|Q96P70|IPO9_HUMAN	yes	no	2,3	7.0058e-33	140.89	631600000
AAAAAAGAGPEMVR	M	14	0	1241.62	sp|P28482|MK01_HUMAN;NM_002745#(r:22_M1824444889116);tr|A8CZ64|A8CZ64_HUMAN	sp|P28482|MK01_HUMAN	yes	no	2	4.7761e-10	135.02	948360000
AAAAAAGEAR	M	10	0	857.436	sp|P09417|DHPR_HUMAN;NM_000320#(f-:4_Q5870076449512);NM_000320#(-s-T:4_Q6201652134930);tr|B3KW71|B3KW71_HUMAN;NM_000320#(f-s-T:4_Q5817940678799);NM_000320#(-s-:4_Q757095329656);NM_000320#(f-s-:4_Q9451261016663);NM_000320#(-t:4_Q651107371875);NM_000320#(f-:4_Q3330521210217);NM_000320#(r:4_Q3853008477755);NM_000320#(f-:4_Q2293049519984);NM_000320#(-s-:4_Q2530685800487);tr|B7Z415|B7Z415_HUMAN;tr|D6R…	sp|P09417|DHPR_HUMAN	yes	no	2	0.0011974	83.883	67582000
AAAAAAGSGTPR	M	12	0	999.51	NM_019896#(f-:2_P6405263182971);sp|Q9NR33|DPOE4_HUMAN;NM_019896#(-s-:2_P1889016556724);NM_019896#(f-:2_P1728864604770)	NM_019896#(f-:2_P6405263182971)	yes	no	2	0.016173	72.29	47799000
AAAAAAGSGTPREEEGPAGEAAASQPQAPTSVPGAR	M	36	1	3287.58	NM_019896#(f-:2_P6405263182971);sp|Q9NR33|DPOE4_HUMAN;NM_019896#(-s-:2_P1889016556724)	NM_019896#(f-:2_P6405263182971)	yes	no	3,4	2.0723e-107	210.21	10819000
AAAAAASAGSSASSGNQPPQELGLGELLEEFSR	R	33	0	3172.53	sp|Q8NCE2|MTMRE_HUMAN;sp|Q8NCE2-3|MTMRE_HUMAN;sp|Q8NCE2-2|MTMRE_HUMAN;NM_001077525#(f-:3_M6010074272996);NM_001077525#(-t:3_M4501958502174);NM_022485#(f-:3_M6010074272996);NM_022485#(-t:3_M4501958502174);NM_001077526#(f-:3_M6010074272996);NM_001077526#(-t:3_M4501958502174);NM_001077525#(-t:3_M658674286821);NM_022485#(f-:3_M9216763562574);tr|C9JSR1|C9JSR1_HUMAN;tr|B4DQK9|B4DQK9_HUMAN;tr|B4DJ23|B4D…	sp|Q8NCE2|MTMRE_HUMAN	yes	no	3	2.5586e-11	75.436	4991100
AAAAAATAAAAASIR	M	15	0	1256.68	NM_016106#(f-t:14_S295328988438);NM_016106#(f-:14_S1448275700367);NM_016106#(-t:14_S3942884763111);sp|Q8WVM8|SCFD1_HUMAN;NM_016106#(f-:14_S7110550821108);NM_016106#(-s-s-:14_S293889762774);NM_016106#(-t:14_S9454690864962);NM_016106#(f-:14_S8316635747957);NM_016106#(f-T:14_S7931061741439);NM_016106#(-t:14_S7649041056500);NM_016106#(f-:14_S92298255353);NM_016106#(f-:14_S455930010479);tr|J3KNG4|J3KN…	NM_016106#(f-t:14_S295328988438)	yes	no	2	7.7624e-16	148.41	112360000
AAAAAATVLLR	R	11	0	1026.62	sp|O60779|S19A2_HUMAN;tr|Q5TIE1|Q5TIE1_HUMAN;sp|O60779-2|S19A2_HUMAN	sp|O60779|S19A2_HUMAN	yes	no	2	0.036135	39.179	220120
AAAAAAVGPGAGGAGSAVPGGAGPCATVSVFPGAR	M	35	0	2906.45	NM_199141#(r:19_C7694671979342);NM_199141#(-s-s-:19_C5476056471999);NM_199141#(-s-:19_C8180441399685);NM_199141#(-s-:19_C1719567782958);sp|Q86X55-1|CARM1_HUMAN;sp|Q86X55|CARM1_HUMAN;NM_199141#(-s-:19_C882717327792);sp|Q86X55-2|CARM1_HUMAN;NM_199141#(-s-s-s-s-:19_C7852196268175);NM_199141#(-s-s-s-:19_C294774753342);NM_199141#(-s-:19_C1125412959001);NM_199141#(-s-s-:19_C5437074510644);NM_199141#(-s…	NM_199141#(r:19_C7694671979342)	yes	no	3,4	3.3436e-10	89.145	199660000
AAAAADLANR	R	10	0	942.488	sp|O76031|CLPX_HUMAN	sp|O76031|CLPX_HUMAN	yes	yes	2	5.762e-05	114.97	125150000
AAAAAGAGSGPWAAQEK	M	17	0	1512.73	NM_015622#(-s-:7_C3013284834204);NM_198097#(-t:7_C5332121631338);sp|P86791|CCZ1_HUMAN;sp|P86790|CCZ1B_HUMAN;NM_015622#(-s-s-s-:7_C5499377996355);NM_015622#(-s-s-:7_C4808792788106);NM_015622#(-s-s-:7_C1526393764415);NM_015622#(-s-:7_C2589136194534);NM_015622#(-s-:7_C3929637923538);NM_015622#(-t:7_C3909346378681);NM_198097#(f-:7_C5205813402623);NM_015622#(-s-s-s-s-s-:7_C5079287313931);NM_015622#(-s…	NM_015622#(-s-:7_C3013284834204)	no	no	2	2.4719e-06	88.427	32820000
AAAAAGLGGGGAGPGPEAGDFLAR	M	24	0	2009.99	sp|P23610|F8I2_HUMAN	sp|P23610|F8I2_HUMAN	yes	yes	3	0.00047631	60.133	23164000
AAAAAGTATSQR	M	12	0	1074.54	sp|Q9Y2Z0|SUGT1_HUMAN;NM_001130912#(f-:13_S9637074689754);NM_001130912#(-t:13_S2899785167297);NM_001130912#(f-:13_S2996623168551);NM_001130912#(-t:13_S3353650466585);NM_001130912#(-s-:13_S5393346547819);sp|Q9Y2Z0-2|SUGT1_HUMAN;NM_006704#(f-:13_S9637074689754)	sp|Q9Y2Z0|SUGT1_HUMAN	no	no	2	3.8202e-16	188.96	838670000
AAAAAMAEQESAR	M	13	0	1275.59	NM_015949#(f-:7_C8949265879640);sp|Q7L5D6|GET4_HUMAN;NM_015949#(-s-:7_C9656088441169);NM_015949#(r:7_C8132949551415);NM_015949#(-s-s-:7_C7333657396229);NM_015949#(-s-:7_C1643666759371);NM_015949#(r:7_C742198453071)	NM_015949#(f-:7_C8949265879640)	no	no	2	1.7608e-07	116.81	86398000
AAAAASAAGPGGLVAGK	K	17	0	1338.73	sp|A6NIH7|U119B_HUMAN	sp|A6NIH7|U119B_HUMAN	yes	yes	2	1.0786e-08	91.355	6736200
AAAAASAAGPGGLVAGKEEK	K	20	1	1724.91	sp|A6NIH7|U119B_HUMAN	sp|A6NIH7|U119B_HUMAN	yes	yes	3	3.4456e-08	101.17	6494200
AAAAASAPQQLSDEELFSQLR	M	21	0	2202.09	sp|Q9Y2U8|MAN1_HUMAN;NM_014319#(r:12_L5632957833692);NM_014319#(r:12_L1849910211800)	sp|Q9Y2U8|MAN1_HUMAN	yes	no	2,3	9.4109e-44	151.87	229100000
AAAAASASQDELNQLER	M	17	0	1743.84	sp|Q5VYK3|ECM29_HUMAN	sp|Q5VYK3|ECM29_HUMAN	yes	yes	2	2.4315e-30	157.37	6840400
AAAAASHLNLDALR	M	14	0	1392.75	sp|Q13049|TRI32_HUMAN;tr|Q5JVY0|Q5JVY0_HUMAN	sp|Q13049|TRI32_HUMAN	yes	no	2	1.3886e-25	220.97	267290000
AAAAATVVPPMVGGPPFVGPVGFGPGDR	R	28	0	2590.34	sp|Q9BTD8-4|RBM42_HUMAN;sp|Q9BTD8-2|RBM42_HUMAN;sp|Q9BTD8-3|RBM42_HUMAN;tr|K7EP90|K7EP90_HUMAN;NM_024321#(-t:19_R1967400899544);sp|Q9BTD8|RBM42_HUMAN;NM_024321#(f-:19_R7291930860854);NM_024321#(f-t:19_R8879017783313);NM_024321#(-t:19_R4468538816859);NM_024321#(f-t:19_R1994322642053);NM_024321#(f-:19_R4379743110694);NM_024321#(-t:19_R9837825265160);NM_024321#(-s-s-s-s-:19_R3277448660369);NM_024321…	sp|Q9BTD8-4|RBM42_HUMAN	yes	no	2,3,4	1.5404e-40	119.45	128430000
AAAAAVGNAVPCGAR	M	15	0	1354.68	NM_020410#(-s-:19_A104838954774);sp|Q9HD20|AT131_HUMAN;NM_020410#(r:19_A3127512868033)	NM_020410#(-s-:19_A104838954774)	yes	no	2	3.5721e-05	81.565	11077000
AAAAAWEEPSSGNGTAR	K	17	0	1644.75	sp|Q9P258|RCC2_HUMAN;NM_018715#(f-T:1_R4952463330065);NM_018715#(-t:1_R4003974254450);NM_018715#(r:1_R5775094165939)	sp|Q9P258|RCC2_HUMAN	yes	no	2	2.7489e-30	150.39	165360000
AAAADSFSGGPAGVR	M	15	0	1332.64	sp|Q96E14|RMI2_HUMAN;tr|I3L2E0|I3L2E0_HUMAN	sp|Q96E14|RMI2_HUMAN	yes	no	2	0.00026942	71.279	15690000
AAAADSFSGGPAGVRLPR	M	18	1	1698.88	sp|Q96E14|RMI2_HUMAN;tr|I3L2E0|I3L2E0_HUMAN	sp|Q96E14|RMI2_HUMAN	yes	no	3	0.0038215	72.433	2050400
AAAAECDVVMAATEPELLDDQEAKR	M	25	1	2702.25	sp|Q99615|DNJC7_HUMAN;tr|K7ESP1|K7ESP1_HUMAN;tr|K7ELJ8|K7ELJ8_HUMAN	sp|Q99615|DNJC7_HUMAN	yes	no	2,3	2.2635e-66	165.85	17514000
AAAAEGVLATR	M	11	0	1028.56	sp|Q6QNY1|BL1S2_HUMAN	sp|Q6QNY1|BL1S2_HUMAN	yes	yes	2	2.4311e-09	150.04	86630000
AAAAELSLLEK	M	11	0	1114.62	sp|O43324|MCA3_HUMAN;sp|O43324-2|MCA3_HUMAN;tr|D6RBD7|D6RBD7_HUMAN;tr|C9J1V9|C9J1V9_HUMAN	sp|O43324|MCA3_HUMAN	yes	no	2	2.8966e-05	113.22	985600000
AAAAEPPVIELGAR	R	14	0	1363.75	sp|P17542-2|TAL1_HUMAN;sp|P17542|TAL1_HUMAN;tr|E7EVM2|E7EVM2_HUMAN	sp|P17542-2|TAL1_HUMAN	yes	no	2	5.282e-07	85.837	19244000
AAAAGAAAAAAAEGEAPAEMGALLLEK	M	27	0	2395.21	NM_025256#(-s-:6_E5140534095859);NM_006709#(-s-:6_E5140534095859);NM_025256#(-s-:6_E5075808600154);NM_006709#(-s-:6_E5075808600154);tr|B0UZY3|B0UZY3_HUMAN;sp|Q96KQ7-2|EHMT2_HUMAN;sp|Q96KQ7|EHMT2_HUMAN;NM_025256#(-s-s-:6_E2641307529941);NM_006709#(-s-s-:6_E2641307529941);NM_025256#(-s-:6_E9160130871588);NM_006709#(-s-:6_E9160130871588);NM_025256#(-s-:6_E9446136423846);NM_006709#(-s-:6_E94461364238…	NM_025256#(-s-:6_E5140534095859)	yes	no	3	4.1411e-11	96.052	10117000
AAAAGEEEEEEEAAR	M	15	0	1560.65	NM_022039#(-s-:10_F7860110667677);NM_022039#(-t:10_F4336492264304);NM_022039#(f-:10_F5480322827698);NM_022039#(f-:10_F3454525428194);NM_022039#(f-T:10_F4623248606309);sp|P57775|FBXW4_HUMAN;NM_022039#(f-T:10_F2803413390850);NM_022039#(f-T:10_F2503638023393);NM_022039#(-t:10_F9299499466117)	NM_022039#(-s-:10_F7860110667677)	yes	no	2	0.00026106	59.634	342300
AAAAGGGGPGTAVGATGSGIAAAAAGLAVYR	M	31	0	2513.3	NM_003074#(-s-:3_S5157930513375);sp|Q92922|SMRC1_HUMAN;NM_003074#(-t:3_S8637391799374);NM_003074#(-s-:3_S5319372730775);tr|F8WE13|F8WE13_HUMAN	NM_003074#(-s-:3_S5157930513375)	yes	no	3	4.4835e-62	165.31	40996000
AAAAGGPCVR	M	10	0	928.455	NM_015354#(-s-:9_N9595471648552);NM_015354#(-s-:9_N9745928181977);sp|Q5SRE5|NU188_HUMAN;NM_015354#(-t:9_N6436360942898);NM_015354#(-s-s-s-:9_N8382636714573);NM_015354#(-s-s-:9_N8413079391842);NM_015354#(-s-s-:9_N854314864296);NM_015354#(-s-:9_N7026548911717);NM_015354#(-s-:9_N6986737752388);NM_015354#(r:9_N4536145634921);NM_015354#(-s-:9_N3061539543528);NM_015354#(-s-:9_N7061388882383);NM_015354#…	NM_015354#(-s-:9_N9595471648552)	yes	no	2	0.026641	55.064	9814000
AAAAGLGHPASPGGSEDGPPGSEEEDAAR	R	29	0	2659.17	sp|Q99856|ARI3A_HUMAN	sp|Q99856|ARI3A_HUMAN	yes	yes	3	5.0697e-07	62.032	685720
AAAAKPNNLSLVVHGPGDLR	M	20	1	1999.1	sp|Q00796|DHSO_HUMAN;NM_003104#(f-:15_S8732394080911);NM_003104#(-s-:15_S1719656342266);NM_003104#(f-:15_S8740944904447);NM_003104#(-s-:15_S6361834941049);NM_003104#(-s-s-:15_S1237722234049);NM_003104#(-s-s-s-:15_S2791727236097);tr|B7Z3A6|B7Z3A6_HUMAN;tr|H0YKB3|H0YKB3_HUMAN	sp|Q00796|DHSO_HUMAN	yes	no	2,3	8.2935e-51	190.83	1192400000
AAAALGSSSGSASPAVAELCQNTPETFLEASK	M	32	0	3121.49	sp|Q96IV0|NGLY1_HUMAN;NM_018297#(-s-:3_N628215779803);NM_018297#(-s-s-:3_N380347905267);sp|Q96IV0-2|NGLY1_HUMAN;NM_018297#(-s-s-:3_N8947687225379);NM_018297#(-s-:3_N5459677554786);NM_018297#(-s-s-:3_N9320092642984);sp|Q96IV0-3|NGLY1_HUMAN;NM_018297#(-s-s-s-s-s-:3_N6355144180848);NM_018297#(-s-s-s-s-:3_N7304099442812);NM_018297#(-s-s-s-:3_N3531535836732);NM_018297#(-s-e-s-:3_N8539756691454);NM_018…	sp|Q96IV0|NGLY1_HUMAN	no	no	3,4	2.1584e-112	187.89	64169000
AAAAMAAAAGGGAGAAR	M	17	0	1314.65	sp|Q9NX46|ARHL2_HUMAN;NM_017825#(f-:1_A61947129144);NM_017825#(-t:1_A7666254069009);NM_017825#(r:1_A2837858492058)	sp|Q9NX46|ARHL2_HUMAN	yes	no	2	0.00013355	74.789	39327000
AAAANLCPGDVILAIDGFGTESMTHADAQDR	K	31	0	3186.47	sp|Q53GG5-2|PDLI3_HUMAN;NM_001114107#(-t:4_P335022282892);NM_001114107#(f-:4_P4278189882300);NM_001114107#(f-T:4_P7769969351061);sp|Q53GG5|PDLI3_HUMAN;NM_014476#(-t:4_P335022282892);NM_001114107#(-s-s-:4_P5982246751246);NM_014476#(f-:4_P4278189882300);NM_014476#(f-T:4_P7769969351061);sp|Q53GG5-3|PDLI3_HUMAN	sp|Q53GG5-2|PDLI3_HUMAN	yes	no	3,4	3.5471e-64	142.22	6715500
AAAANSGSSLPLFDCPTWAGKPPPGLHLDVVK	M	32	1	3272.67	sp|Q12972|PP1R8_HUMAN;NM_014110#(-t:1_P6789614363770)	sp|Q12972|PP1R8_HUMAN	yes	no	3,4	2.345e-48	152.53	214790000
AAAAPAAAAASSEAPAASATAEPEAGDQDSR	M	31	0	2782.26	sp|Q15283|RASA2_HUMAN;tr|G3V0F9|G3V0F9_HUMAN;tr|D6RBA9|D6RBA9_HUMAN	sp|Q15283|RASA2_HUMAN	yes	no	3	0.0064704	54.097	586860
AAAAPAATTATPPPEGAPPQPGVHNLPVPTLFGTVK	K	36	0	3442.82	NM_015168#(-t:19_Z3495756892937);NM_015168#(f-:19_Z3771646693685);sp|Q9UPT8|ZC3H4_HUMAN;NM_015168#(f-T:19_Z385591500759);tr|M0QY97|M0QY97_HUMAN	sp|Q9UPT8|ZC3H4_HUMAN	no	no	3,4,5	3.273e-57	127.95	84374000
AAAAPGASPSPGGDAAWSEAGPGPR	R	25	0	2204.02	sp|P52701|MSH6_HUMAN;NM_000179#(f-T:2_M6104956986281);NM_000179#(-t:2_M1996803172192);NM_000179#(r:2_M8061406466459);tr|B4DF41|B4DF41_HUMAN;sp|P52701-2|MSH6_HUMAN;tr|F8WAX8|F8WAX8_HUMAN;tr|F8W7G9|F8W7G9_HUMAN	sp|P52701|MSH6_HUMAN	yes	no	2	6.8403e-05	62.082	50339000
AAAAPGASPSPGGDAAWSEAGPGPRPLAR	R	29	1	2641.3	sp|P52701|MSH6_HUMAN;NM_000179#(f-T:2_M6104956986281);NM_000179#(-t:2_M1996803172192);NM_000179#(r:2_M8061406466459);tr|B4DF41|B4DF41_HUMAN;sp|P52701-2|MSH6_HUMAN;tr|F8WAX8|F8WAX8_HUMAN;tr|F8W7G9|F8W7G9_HUMAN	sp|P52701|MSH6_HUMAN	yes	no	3	0.00030828	70.449	91593000
AAAAQLSLTQLSSGNPVYEK	M	20	0	2047.06	sp|P42566|EPS15_HUMAN;NM_001981#(-s-:1_E6199386348474);NM_001981#(f-:1_E9416567104894);tr|B1AUU8|B1AUU8_HUMAN;NM_001981#(-t:1_E6955088390200);tr|A6NL94|A6NL94_HUMAN	sp|P42566|EPS15_HUMAN	yes	no	2,3	9.0459e-25	125.23	60230000
AAAASAAEAGIATTGTEDSDDALLK	R	25	0	2319.11	NM_002810#(-t:1_P168512623559);sp|P55036|PSMD4_HUMAN;NM_002810#(-s-:1_P8773215954499);NM_002810#(-t:1_P1764375383963);NM_002810#(f-:1_P1881278247050);NM_002810#(-s-:1_P5570738385611);NM_002810#(-s-:1_P7746306411842);NM_002810#(-s-:1_P6257468042466);NM_002810#(-s-s-:1_P2478667006998);NM_002810#(-s-s-:1_P8354992796121);NM_002810#(-s-:1_P2311760008668);NM_002810#(-s-s-s-:1_P1652031909874);NM_002810#…	NM_002810#(-t:1_P168512623559)	yes	no	2,3	5.3196e-102	196.62	138340000
AAAASAAEAGIATTGTEGERDSDDALLK	R	28	1	2661.27	tr|Q5VWC4|Q5VWC4_HUMAN	tr|Q5VWC4|Q5VWC4_HUMAN	yes	yes	3,4	0.0076331	58.812	2760000
AAAASVPNADGLK	K	13	0	1183.62	sp|A1X283|SPD2B_HUMAN	sp|A1X283|SPD2B_HUMAN	yes	yes	2	3.9676e-05	76.073	32674000
AAAAVAAAASSCRPLGSGAGPGPTGAAPVSAPAPGPGPAGK	R	41	1	3449.75	NM_013403#(-s-:19_S6867940159456);NM_001039877#(-s-:19_S6867940159456);sp|Q9NRL3|STRN4_HUMAN;tr|F8VYA6|F8VYA6_HUMAN;NM_013403#(-s-s-:19_S4458103812147);NM_001039877#(-s-s-:19_S4458103812147);NM_013403#(-s-:19_S8409602344260);NM_001039877#(-s-:19_S8409602344260);NM_013403#(-s-:19_S5928016045261);NM_001039877#(-s-:19_S5928016045261);NM_001039877#(-s-s-s-:19_S6185697661573);NM_013403#(-s-s-s-:19_S23…	NM_013403#(-s-:19_S6867940159456)	yes	no	4	0.072532	29.86	351850
AAAAVAR	M	7	0	628.366	sp|O75489|NDUS3_HUMAN;NM_004551#(f-t:11_N695648987514);NM_004551#(-s-:11_N3776807085179);tr|B4DFM8|B4DFM8_HUMAN;NM_004551#(-t:11_N6049224593334);NM_004551#(f-:11_N7708754507584);tr|E9PS48|E9PS48_HUMAN;tr|G3V194|G3V194_HUMAN;tr|E9PKL8|E9PKL8_HUMAN;tr|E9PJE7|E9PJE7_HUMAN	sp|O75489|NDUS3_HUMAN	yes	no	2	0.045823	80.377	79891000
AAAAVEPDVVVK	R	12	0	1167.65	tr|Q6GYA4|Q6GYA4_HUMAN;sp|Q9BQE4|SELS_HUMAN;tr|E9PJB8|E9PJB8_HUMAN;NM_018445#(f-t:15_S1786547487842);NM_018445#(f-:15_S5470692527792);NM_018445#(-t:15_S3791855301173);tr|E9PN30|E9PN30_HUMAN;tr|E9PQ66|E9PQ66_HUMAN	tr|Q6GYA4|Q6GYA4_HUMAN	yes	no	2	7.7839e-05	77.124	129320000
AAAAVGAGHGAGGPGAASSSGGAR	M	24	0	1863.89	NM_024881#(-s-:19_S4493495648876);sp|Q96K37|S35E1_HUMAN	NM_024881#(-s-:19_S4493495648876)	yes	no	2,3	5.1181e-41	149.71	170830000
AAAAVQGGR	M	9	0	799.43	sp|Q15005|SPCS2_HUMAN;NM_014752#(f-T:11_S7880296156275);NM_014752#(-t:11_S1830038336154);NM_014752#(f-:11_S9917349865236);NM_014752#(-t:11_S2702013678560);NM_014752#(-t:11_S7430362727791);NM_014752#(-t:11_S2361493189162);NM_014752#(-t:11_S5386154756506);tr|E9PI68|E9PI68_HUMAN;NM_014752#(-s-:11_S1563243255971);tr|E9PL01|E9PL01_HUMAN;NM_014752#(f-T:11_S6214636486288);NM_014752#(f-:11_S9324617083367…	sp|Q15005|SPCS2_HUMAN	yes	no	2	0.0027102	82.529	167770000
AAAAVSESWPELELAER	M	17	0	1827.9	sp|Q8N1G4|LRC47_HUMAN;NM_020710#(-s-:1_L9572342526294)	sp|Q8N1G4|LRC47_HUMAN	yes	no	2,3	1.685e-30	157.58	146960000
AAAAVSESWPELELAERER	M	19	1	2113.04	sp|Q8N1G4|LRC47_HUMAN;NM_020710#(-s-:1_L9572342526294)	sp|Q8N1G4|LRC47_HUMAN	yes	no	3	0.037069	50.831	831970
AAAAVSSAK	M	9	0	774.424	NM_006441#(-t:15_M1753463756642);sp|P49914|MTHFS_HUMAN;NM_006441#(f-T:15_M4142410409416);NM_006441#(f-:15_M1197785803332);NM_006441#(-s-:15_M9897092925430);tr|H3BN04|H3BN04_HUMAN	NM_006441#(-t:15_M1753463756642)	yes	no	1,2	0.015103	101.43	20971000
AAAAVVAAAAR	R	11	0	940.545	sp|Q8WWH5|TRUB1_HUMAN;NM_139169#(-t:10_T6851147676885);NM_139169#(-s-:10_T9147229742317);NM_139169#(-t:10_T7256044149091)	sp|Q8WWH5|TRUB1_HUMAN	yes	no	2	6.2673e-05	105.2	85158000
AAAAVVEFQR	M	10	0	1060.57	NM_002815#(-s-:17_P8259760552602);NM_002815#(f-:17_P5195293317558);sp|O00231|PSD11_HUMAN;NM_002815#(f-:17_P2401544856256);NM_002815#(-s-:17_P7288876345395);NM_002815#(-s-:17_P7157212417001);NM_002815#(-s-:17_P5793439270032);NM_002815#(-t:17_P2476850584956);sp|O00231-2|PSD11_HUMAN;NM_002815#(-s-:17_P4003747358843);NM_002815#(-s-s-:17_P4966124844762);NM_002815#(-s-:17_P2033595151547);NM_002815#(-s-…	NM_002815#(-s-:17_P8259760552602)	yes	no	2	3.7707e-07	142.43	829050000
AAAAVVVPAEWIK	M	13	0	1323.76	NM_001081550#(-s-:X_T7278378646542);NM_001081550#(-s-:X_T4077131839062);NM_001081550#(-s-s-:X_T2065496251892);tr|F2Z2V2|F2Z2V2_HUMAN;sp|Q8NI27|THOC2_HUMAN;NM_001081550#(-t:X_T2679913968816);NM_001081550#(f-:X_T1903852359365);NM_001081550#(f-T:X_T492440357370);NM_001081550#(-s-:X_T8890686929613);NM_001081550#(f-:X_T8234206150787);NM_001081550#(f-T:X_T8996334286150);NM_001081550#(-t:X_T924025372302…	sp|Q8NI27|THOC2_HUMAN	no	no	2	1.0199e-05	87.719	556110000
AAADGALPEAAALEQPAELPASVR	M	24	0	2317.19	sp|P23025|XPA_HUMAN;tr|F2Z2T2|F2Z2T2_HUMAN;NM_000380#(-s-:9_X6350900784232)	sp|P23025|XPA_HUMAN	yes	no	2,3	1.457e-30	127.92	46584000
AAADGGGPGGASVGTEEDGGGVGHR	M	25	0	2136.94	NM_015295#(-s-:18_S9290152756364);NM_015295#(-s-s-:18_S2661990789771);NM_015295#(-s-s-s-:18_S6525924997399);NM_015295#(-s-s-:18_S2031463394064);NM_015295#(-s-:18_S2961329522855);sp|A6NHR9|SMHD1_HUMAN;NM_015295#(-s-:18_S8990627430871);NM_015295#(-s-:18_S9443152253237);NM_015295#(-s-:18_S5368833953528);sp|A6NHR9-2|SMHD1_HUMAN	sp|A6NHR9|SMHD1_HUMAN	no	no	3	6.1899e-31	137.52	3087100
AAADGSLQWEVGGWR	R	15	0	1601.76	tr|H3BSM7|H3BSM7_HUMAN;NM_022744#(-t:16_C2298497809172);sp|Q96GQ5|CP058_HUMAN;NM_022744#(-s-:16_C9629632335836);NM_022744#(-s-:16_C279906194913);NM_022744#(-s-:16_C4147462393967);NM_022744#(f-T:16_C3037635223486);NM_022744#(f-:16_C8646711155103);tr|H3BTA0|H3BTA0_HUMAN;tr|H3BS97|H3BS97_HUMAN	tr|H3BSM7|H3BSM7_HUMAN	yes	no	2	1.0936e-47	242.07	31614000
AAADLMAYCEAHAK	K	14	0	1520.68	sp|P59768|GBG2_HUMAN;tr|G3V3J9|G3V3J9_HUMAN;tr|G3V2N0|G3V2N0_HUMAN	sp|P59768|GBG2_HUMAN	yes	no	2,3	1.3935e-08	104.7	223400000
AAADLMAYCEAHAKEDPLLTPVPASENPFR	K	30	1	3283.56	sp|P59768|GBG2_HUMAN;tr|G3V3J9|G3V3J9_HUMAN;tr|G3V2N0|G3V2N0_HUMAN	sp|P59768|GBG2_HUMAN	yes	no	4	6.0847e-09	78.755	122300000
AAADSDPNLDPLMNPHIR	R	18	0	1945.93	sp|O95159|ZFPL1_HUMAN;NM_006782#(r:11_Z8026417118588);NM_006782#(-s-:11_Z871129345876)	sp|O95159|ZFPL1_HUMAN	yes	no	3	0.00048115	53.504	4494200
AAADTLQGPMQAAYR	R	15	0	1562.75	NM_014329#(f-t:16_E7887517660241);sp|Q6P2E9|EDC4_HUMAN;NM_014329#(r:16_E904006409367);NM_014329#(-s-:16_E2255814819030);NM_014329#(-s-:16_E6198207729904);NM_014329#(-s-s-s-:16_E4988740576492);NM_014329#(-s-s-s-:16_E7286015741327);NM_014329#(-s-s-s-:16_E5331300514786);NM_014329#(-s-:16_E7152495232127);NM_014329#(-s-:16_E4007469769952);NM_014329#(-s-s-:16_E4657199969045);NM_014329#(-s-s-:16_E117406…	NM_014329#(f-t:16_E7887517660241)	no	no	2	5.1553e-32	178.15	477580000
AAAEAANCIMEVSCGQAESSEKPNAEDMTSK	M	31	1	3285.39	sp|Q99873-4|ANM1_HUMAN;NM_198318#(-t:19_P3546307529515);NM_198318#(f-:19_P7813886204350);NM_198318#(-t:19_P6877779557713);NM_198318#(-s-s-:19_P3052688497518);NM_198318#(-s-s-:19_P2524619063098);NM_198318#(-s-s-:19_P6996115517492);NM_198318#(-s-:19_P1168055092648);NM_198318#(f-:19_P14274405745);NM_198318#(r:19_P311781020522);NM_198318#(-s-s-s-s-:19_P3533493764749);NM_198318#(-s-:19_P5388991371930)…	sp|Q99873-4|ANM1_HUMAN	yes	no	3,4	6.8483e-133	215.47	440800000
AAAEDVNVTFEDQQK	K	15	0	1663.77	sp|Q9NQP4|PFD4_HUMAN;tr|E9PQY2|E9PQY2_HUMAN	sp|Q9NQP4|PFD4_HUMAN	yes	no	2,3	4.4615e-55	244	329000000
AAAEEGHIIPR	R	11	0	1162.61	sp|O95551|TYDP2_HUMAN;sp|O95551-2|TYDP2_HUMAN;sp|O95551-3|TYDP2_HUMAN;NM_016614#(r:6_T8665898519244);NM_016614#(r:6_T9281998013915)	sp|O95551|TYDP2_HUMAN	yes	no	2,3	0.00056264	68.436	9635700
AAAEELLAR	R	9	0	942.513	NM_001567#(f-:11_I1291515166537);sp|O15357|SHIP2_HUMAN;NM_001567#(r:11_I3195963279133);NM_001567#(r:11_I5606643590243);NM_001567#(-s-s-s-:11_I5681440036731);NM_001567#(-s-:11_I4788725943906);NM_001567#(-s-:11_I300281493300);NM_001567#(-t:11_I2818627793539);NM_001567#(-s-s-:11_I3822019560740);NM_001567#(-s-:11_I5243436635674);NM_001567#(-s-:11_I4479844586481);NM_001567#(-s-:11_I8668683504991);NM_0…	NM_001567#(f-:11_I1291515166537)	yes	no	2	0.0025523	78.113	1704300
AAAEGLMSLLR	K	11	0	1130.61	sp|P30260|CDC27_HUMAN;tr|G3V1C4|G3V1C4_HUMAN;tr|B4DL80|B4DL80_HUMAN	sp|P30260|CDC27_HUMAN	yes	no	2	7.9125e-06	114.86	55887000
AAAEGPVGDGELWQTWLPNHVVFLR	M	25	0	2761.4	NM_002532#(f-t:17_N2608058868637);sp|Q99567|NUP88_HUMAN;NM_002532#(-t:17_N3428164929597);NM_002532#(-s-:17_N5734475531066);NM_002532#(-t:17_N7340965306975);NM_002532#(f-:17_N9756636723595);NM_002532#(-s-:17_N220407172160);NM_002532#(r:17_N19292031674);NM_002532#(f-:17_N6624278664378);NM_002532#(-s-:17_N6196867754632);tr|I3L2W3|I3L2W3_HUMAN	NM_002532#(f-t:17_N2608058868637)	no	no	3	1.5618e-05	61.345	2337600
AAAEKPEEQGPEPLPISTQEW	K	21	1	2306.11	NM_021238#(f-t:12_F2644403778445);sp|Q9NP50|FA60A_HUMAN;sp|Q9NP50-2|FA60A_HUMAN;NM_021238#(f-:12_F119099634112)	NM_021238#(f-t:12_F2644403778445)	yes	no	2,3	2.4037e-12	109.37	37736000
AAAEQAISVR	K	10	0	1014.55	NM_001001998#(-s-s-s-:1_E9767247913955);NM_002685#(-s-s-s-:1_E9767247913955);NM_001001998#(-s-s-:1_E3061257518385);NM_002685#(-s-s-:1_E3061257518385)	NM_001001998#(-s-s-s-:1_E9767247913955)	no	no	2	0.00014896	103.87	201290000
AAAEVADTQLMLGVGLIEK	M	19	0	1928.03	sp|Q8TCE6|FA45A_HUMAN;tr|B4DDW8|B4DDW8_HUMAN	sp|Q8TCE6|FA45A_HUMAN	yes	no	3	0.024471	43.696	971720
AAAEVAGQFVIK	R	12	0	1202.67	sp|P02786|TFR1_HUMAN;tr|G3V0E5|G3V0E5_HUMAN;tr|F5H6B1|F5H6B1_HUMAN;NM_001128148#(f-:3_T739869483498);tr|H7C3V5|H7C3V5_HUMAN	sp|P02786|TFR1_HUMAN	yes	no	2,3	1.5424e-10	132.32	42761000
AAAEVNQDYGLDPK	R	14	0	1489.7	sp|P07954-2|FUMH_HUMAN;NM_000143#(f-:1_F2778340654721);sp|P07954|FUMH_HUMAN;NM_000143#(f-:1_F9762790352606);NM_000143#(-s-:1_F2647880460415);NM_000143#(-s-:1_F7416844082699);NM_000143#(-s-:1_F3072825760331);NM_000143#(-s-s-:1_F5599200109339)	sp|P07954-2|FUMH_HUMAN	yes	no	2,3	9.661e-14	126.09	2918600000
AAAFEASGALAAVATAMPAEHVAVQVPAPEPTPGPVR	M	37	0	3550.82	sp|Q9UHI6|DDX20_HUMAN;tr|B4DWV7|B4DWV7_HUMAN	sp|Q9UHI6|DDX20_HUMAN	yes	no	3,4	1.983e-145	203.52	27002000
AAAFEEQENETVVVK	K	15	0	1662.81	NM_006289#(-s-s-:9_T5448982096712);NM_006289#(-s-s-s-:9_T6529221633583);NM_006289#(-s-s-s-s-s-s-:9_T9877463915433);NM_006289#(-s-s-s-s-s-:9_T6437789503476);NM_006289#(-s-s-s-s-s-:9_T8209657931625);NM_006289#(-s-s-s-s-s-:9_T8034355452369);NM_006289#(-s-s-s-s-:9_T3658876082806);NM_006289#(-s-s-s-s-s-s-s-s-s-:9_T936014498235);NM_006289#(-s-s-s-s-s-s-s-s-:9_T9102193833970);NM_006289#(-s-s-s-s-s-s-s-s…	NM_006289#(-s-s-s-:9_T1596020102767)	no	no	2,3	2.2192e-32	158.52	169920000
AAAFEEQENETVVVKEK	K	17	1	1919.95	NM_006289#(-s-s-:9_T5448982096712);NM_006289#(-s-s-s-:9_T6529221633583);NM_006289#(-s-s-s-s-s-s-:9_T9877463915433);NM_006289#(-s-s-s-s-s-:9_T6437789503476);NM_006289#(-s-s-s-s-s-:9_T8209657931625);NM_006289#(-s-s-s-s-s-:9_T8034355452369);NM_006289#(-s-s-s-s-:9_T3658876082806);NM_006289#(-s-s-s-s-s-s-s-s-s-:9_T936014498235);NM_006289#(-s-s-s-s-s-s-s-s-:9_T9102193833970);NM_006289#(-s-s-s-s-s-s-s-s…	NM_006289#(-s-s-s-:9_T1596020102767)	no	no	2,3,4	1.3445e-38	176.94	25635000
AAAFEQLQK	R	9	0	1004.53	sp|O94826|TOM70_HUMAN	sp|O94826|TOM70_HUMAN	yes	yes	2	2.4594e-06	144.12	1665500000
AAAFPPGFSISEIK	K	14	0	1433.76	sp|Q9H9Y2|RPF1_HUMAN;NM_025065#(f-:1_B1743552634469);NM_025065#(-t:1_B7945048343385)	sp|Q9H9Y2|RPF1_HUMAN	yes	no	2	0.00013387	64.104	41113000
AAAFQHLLLLVGIHLLKVLDLVEVLVTK	R	28	1	3064.88	NM_014520#(-s-s-s-s-s-:17_M8800510072595);NM_001105538#(-s-s-s-s-s-:17_M8800510072595)	NM_014520#(-s-s-s-s-s-:17_M8800510072595)	yes	no	4	0.081616	0	230980
AAAFVTSPPLSPDPTTPDYINSLLASGDLQLSGSAHCTFSTAQK	K	44	0	4533.2	sp|Q14195-2|DPYL3_HUMAN;sp|Q14195|DPYL3_HUMAN;NM_001387#(-s-:5_D1728727162763);NM_001387#(-s-:5_D2448246693073);NM_001387#(-s-:5_D4332319849326);NM_001387#(-s-s-:5_D9008962398025);NM_001387#(-s-s-:5_D8071216804000);NM_001387#(-s-s-s-:5_D6728987446563)	sp|Q14195-2|DPYL3_HUMAN	yes	no	3,4	1.7683e-142	172.14	38630000
AAAFVTSPPLSPDPTTPDYLTSLLACGDLQVTGSGHCPYSTAQK	K	44	0	4591.19	tr|E9PD68|E9PD68_HUMAN;sp|Q14194|DPYL1_HUMAN;sp|Q14194-2|DPYL1_HUMAN;NM_001313#(f-:4_C2844227843527);NM_001313#(-t:4_C3355710687887);NM_001014809#(-t:4_C3355710687887);NM_001313#(-s-:4_C4175726319990);NM_001313#(-s-:4_C7377974788378);NM_001014809#(-s-:4_C4175726319990);NM_001014809#(-s-:4_C7377974788378);NM_001313#(-s-s-:4_C7022032781733);NM_001014809#(-s-s-:4_C7022032781733);NM_001014809#(f-T:4_…	tr|E9PD68|E9PD68_HUMAN	yes	no	4	0.024986	14.932	1525900
AAAFVTSPPVNPDPTTADHLTCLLSSGDLQVTGSAHCTFTTAQK	K	44	0	4584.19	sp|O14531|DPYL4_HUMAN;NM_006426#(-s-:10_D5035576587200);NM_006426#(f-:10_D6779917126886);tr|Q5T0Q6|Q5T0Q6_HUMAN	sp|O14531|DPYL4_HUMAN	yes	no	4	0.091541	0.4721	189290
AAAGAAATHLEVAR	M	14	0	1307.69	sp|Q96S52|PIGS_HUMAN;tr|K7EN97|K7EN97_HUMAN	sp|Q96S52|PIGS_HUMAN	yes	no	2,3	8.9013e-13	141.88	623810000
AAAGDLGGDHLAFSCDVAK	K	19	0	1873.86	sp|Q8N4T8|CBR4_HUMAN;sp|Q8N4T8-2|CBR4_HUMAN;NM_032783#(-s-:4_C9825896620395);tr|H0Y962|H0Y962_HUMAN	sp|Q8N4T8|CBR4_HUMAN	yes	no	3	1.0348e-19	107.72	434860000
AAAGEDYK	K	8	0	823.371	sp|P23381|SYWC_HUMAN;NM_004184#(-s-:14_W5392731147709);NM_004184#(-s-:14_W8477552454291);NM_004184#(-t:14_W7018279241374);NM_004184#(-s-:14_W2312318364958);sp|P23381-2|SYWC_HUMAN;NM_004184#(-s-:14_W7935417814384);NM_004184#(f-T:14_W1705514370284);NM_004184#(-s-:14_W9702738288909);NM_213645#(-s-:14_W5392731147709);NM_004184#(-s-s-:14_W2451910771047);NM_213645#(-s-:14_W8477552454291);NM_213645#(-s-…	sp|P23381|SYWC_HUMAN	yes	no	2	0.0043639	95.741	15811000
AAAGEFADDPCSSVK	K	15	0	1523.66	sp|P35221|CTNA1_HUMAN;NM_001903#(f-:5_C6056771221311);NM_001903#(-t:5_C8610929980572);NM_001903#(-s-:5_C2945771852599);sp|P35221-2|CTNA1_HUMAN;NM_001903#(f-:5_C7996479579328);NM_001903#(f-:5_C4060822151343);NM_001903#(-t:5_C3377685637259);NM_001903#(-s-:5_C9960879542051);NM_001903#(-s-:5_C6775680760201);NM_001903#(-s-:5_C2437250967220);NM_001903#(-s-:5_C2253430330055);NM_001903#(-t:5_C25644168493…	sp|P35221|CTNA1_HUMAN	no	no	2	1.7295e-19	135.14	709480000
AAAGEFADDPCSSVKR	K	16	1	1679.76	sp|P35221|CTNA1_HUMAN;NM_001903#(f-:5_C6056771221311);NM_001903#(-t:5_C8610929980572);NM_001903#(-s-:5_C2945771852599);sp|P35221-2|CTNA1_HUMAN;NM_001903#(f-:5_C7996479579328);NM_001903#(f-:5_C4060822151343);NM_001903#(-t:5_C3377685637259);NM_001903#(-s-:5_C9960879542051);NM_001903#(-s-:5_C6775680760201);NM_001903#(-s-:5_C2437250967220);NM_001903#(-s-:5_C2253430330055);NM_001903#(-t:5_C25644168493…	sp|P35221|CTNA1_HUMAN	no	no	3	2.8613e-18	124.78	12385000
AAAGELQEDSGLCVLAR	K	17	0	1758.86	NM_024329#(f-:1_E757221140772);NM_024329#(f-T:1_E4306196205759);NM_024329#(f-T:1_E5963168773963);sp|Q96C19|EFHD2_HUMAN;NM_024329#(-t:1_E3016041983538);NM_024329#(-t:1_E4555996997644);NM_024329#(-s-:1_E4958963465799);tr|H0Y4Y4|H0Y4Y4_HUMAN	NM_024329#(f-:1_E757221140772)	yes	no	2,3	4.4944e-46	210.9	259720000
AAAGELQEDSGLMALAK	K	17	0	1673.83	sp|Q9BUP0|EFHD1_HUMAN;sp|Q9BUP0-2|EFHD1_HUMAN;tr|Q8WYH2|Q8WYH2_HUMAN;tr|C9JTV4|C9JTV4_HUMAN	sp|Q9BUP0|EFHD1_HUMAN	yes	no	2	4.1315e-20	124.68	3180300
AAAGGGGGGAAAAGR	M	15	0	1070.52	sp|Q9UL25|RAB21_HUMAN	sp|Q9UL25|RAB21_HUMAN	yes	yes	2	1.9709e-16	154.85	446700000
AAAGGLAMLTSMR	R	13	0	1248.63	sp|Q9H3U1-2|UN45A_HUMAN;NM_001039675#(-s-:15_U4205739839471);sp|Q9H3U1|UN45A_HUMAN;NM_018671#(-s-:15_U4205739839471);NM_018671#(f-e-e-T:15_U567043626069);NM_001039675#(-t:15_U3595802805641);NM_001039675#(-s-:15_U4117184566930);NM_001039675#(-s-:15_U2646197739850);sp|Q9H3U1-3|UN45A_HUMAN	sp|Q9H3U1-2|UN45A_HUMAN	yes	no	2	4.2506e-06	86.803	91593000
AAAGGQGSAVAAEAEPGKEEPPAR	R	24	1	2220.08	sp|Q9GZT9-2|EGLN1_HUMAN;sp|Q9GZT9|EGLN1_HUMAN;NM_022051#(-s-:1_E8814051522313)	sp|Q9GZT9-2|EGLN1_HUMAN	yes	no	3	4.6661e-69	186.96	16592000
AAAGIQPPGYLIHESACWSDTLQR	R	24	0	2640.28	sp|Q8WVQ1|CANT1_HUMAN;NM_138793#(r:17_C7159755950725)	sp|Q8WVQ1|CANT1_HUMAN	yes	no	3	2.1364e-41	123.12	54904000
AAAGKAELELELGR	K	14	1	1426.78	sp|Q15149-3|PLEC_HUMAN;NM_201381#(-s-s-s-s-s-s-s-:8_P6621846105569);NM_201381#(-s-s-s-s-s-s-:8_P8321402263697);NM_201381#(-s-s-s-s-s-s-s-s-s-s-s-:8_P4728626145876);NM_201381#(-s-s-s-s-s-s-s-s-s-s-:8_P4672746876300)	sp|Q15149-3|PLEC_HUMAN	no	no	3	9.471e-06	90.707	246870
AAAGLMSLLR	K	10	0	1001.57	tr|G5EA36|G5EA36_HUMAN;tr|I3L328|I3L328_HUMAN	tr|G5EA36|G5EA36_HUMAN	yes	no	2	0.025661	46.352	4890600
AAAGPAAGPTGPEPMPSYAQLVQR	M	24	0	2336.16	sp|P27544-2|CERS1_HUMAN;sp|P27544|CERS1_HUMAN	sp|P27544-2|CERS1_HUMAN	yes	no	2,3	6.2858e-79	182.22	15043000
AAAGQESEGPAVGPPQPLGK	K	20	0	1859.94	sp|O14497|ARI1A_HUMAN;sp|O14497-2|ARI1A_HUMAN	sp|O14497|ARI1A_HUMAN	yes	no	2,3	2.6022e-42	138.46	56678000
AAAGSLPGLQAQLAQAEQR	K	19	0	1878.99	sp|Q9BQS8|FYCO1_HUMAN;tr|B7ZKT7|B7ZKT7_HUMAN	sp|Q9BQS8|FYCO1_HUMAN	yes	no	3	0.00041389	55.688	3275200
AAAGYPDPYSR	R	11	0	1166.54	sp|P58107|EPIPL_HUMAN;tr|E9PPU0|E9PPU0_HUMAN	sp|P58107|EPIPL_HUMAN	no	no	2	0.048017	37.327	11597000
AAAHCAHVFTTVSQITAIEAQHLLK	R	25	0	2716.41	sp|P13807|GYS1_HUMAN;NM_002103#(f-:19_G5051670027560);sp|P13807-2|GYS1_HUMAN;tr|B7Z806|B7Z806_HUMAN;NM_002103#(-s-:19_G6118689409820);NM_002103#(f-t:19_G7360760220202);NM_002103#(-t:19_G3179820412893);NM_002103#(-s-:19_G9291092715930);NM_002103#(-s-s-:19_G7952369856112);NM_002103#(-s-s-:19_G2308904085042);NM_002103#(-s-s-:19_G6270306712176);NM_002103#(-s-s-s-:19_G4588906906845);tr|F5H3S3|F5H3S3_H…	sp|P13807|GYS1_HUMAN	yes	no	4,5	1.7903e-30	108.28	62548000
AAAHHYGAQCDKPNK	K	15	1	1666.76	sp|P51970|NDUA8_HUMAN;tr|F5H7V7|F5H7V7_HUMAN	sp|P51970|NDUA8_HUMAN	yes	no	3,4	1.759e-33	216.15	126200000
AAAHLQGLIQVASR	K	14	0	1433.81	sp|Q9BR61|ACBD6_HUMAN;NM_032360#(-t:1_A3408623908563);NM_032360#(-t:1_A3629615014387);NM_032360#(f-T:1_A6816032527285);NM_032360#(f-:1_A4098774454059);NM_032360#(f-:1_A6559986720213);NM_032360#(-s-:1_A9098106063294)	sp|Q9BR61|ACBD6_HUMAN	yes	no	3	2.3428e-06	75.102	1598300
AAAIGIDLGTTYSCVGVFQHGK	K	22	0	2264.13	sp|P08107|HSP71_HUMAN;tr|F8VZJ4|F8VZJ4_HUMAN;sp|P08107-2|HSP71_HUMAN;tr|E7EP94|E7EP94_HUMAN;tr|Q5SP16|Q5SP16_HUMAN;tr|E7EP11|E7EP11_HUMAN	sp|P08107|HSP71_HUMAN	yes	no	2,3,4	1.0402e-88	208.17	8687500000
AAAIGITQVVISR	R	13	0	1297.77	sp|Q96NB2|SFXN2_HUMAN;NM_178858#(-s-s-:10_S422384768848);NM_178858#(-s-:10_S5117304006311)	sp|Q96NB2|SFXN2_HUMAN	yes	no	2	0.010544	44.246	19784000
AAAITDMADLEELSR	M	15	0	1604.77	sp|Q6ZN18-2|AEBP2_HUMAN;sp|Q6ZN18|AEBP2_HUMAN;NM_001114176#(f-:12_A3451372823483)	sp|Q6ZN18-2|AEBP2_HUMAN	yes	no	2	8.4654e-07	88.768	6821200
AAALAAAVAQDPAASGAPSS	R	20	0	1695.84	sp|Q8TAE8|G45IP_HUMAN	sp|Q8TAE8|G45IP_HUMAN	yes	yes	2	0.00042159	52.862	7831200
AAALASGCTVEIK	R	13	0	1289.66	sp|Q8IYS1|P20D2_HUMAN	sp|Q8IYS1|P20D2_HUMAN	yes	yes	2	1.7583e-06	91.62	171050000
AAALATVNAWAEQTGMK	R	17	0	1731.86	sp|Q14008|CKAP5_HUMAN;NM_001008938#(-s-:11_C8960504124957);sp|Q14008-2|CKAP5_HUMAN;NM_014756#(-s-:11_C8960504124957);sp|Q14008-3|CKAP5_HUMAN;NM_001008938#(r:11_C8671801338222);NM_014756#(r:11_C8671801338222)	sp|Q14008|CKAP5_HUMAN	yes	no	2,3	2.8341e-42	182.37	203870000
AAALCNACELSGK	R	13	0	1363.62	sp|Q7Z392|TPC11_HUMAN;sp|Q7Z392-4|TPC11_HUMAN;NM_021942#(-t:4_C2773422567139);sp|Q7Z392-3|TPC11_HUMAN	sp|Q7Z392|TPC11_HUMAN	yes	no	2	1.4894e-06	91.62	14554000
AAALDPAWPEPR	R	12	0	1292.65	sp|Q8N0Z6|TTC5_HUMAN;NM_138376#(-s-:14_T9340442867095);tr|H0Y6R6|H0Y6R6_HUMAN;NM_138376#(-s-s-s-:14_T9491781400163);NM_138376#(-s-s-:14_T9440578054819);NM_138376#(-s-s-:14_T3208967911586);NM_138376#(-s-:14_T6046514095411)	sp|Q8N0Z6|TTC5_HUMAN	yes	no	2	1.0957e-05	101.89	8301400
AAALDVYNAVSTSFQR	K	16	0	1711.85	sp|Q96QE3|ATAD5_HUMAN;sp|Q96QE3-2|ATAD5_HUMAN	sp|Q96QE3|ATAD5_HUMAN	yes	no	3	6.7403e-07	73.833	219140
AAALEACLDVTK	R	12	0	1260.64	sp|Q9H0G5|NSRP1_HUMAN;NM_032141#(-s-:17_C5748260614766);tr|K7ERM9|K7ERM9_HUMAN	sp|Q9H0G5|NSRP1_HUMAN	yes	no	2	0.00022937	69.03	9142300
AAALEAMK	K	8	0	803.421	NM_006819#(r:11_S7664101520406);tr|H0YGI8|H0YGI8_HUMAN;NM_006819#(-s-s-:11_S992302116899)	NM_006819#(r:11_S7664101520406)	no	no	2	0.0042815	91.318	919190000
AAALEAMKDYTK	K	12	1	1310.65	NM_006819#(r:11_S7664101520406);tr|H0YGI8|H0YGI8_HUMAN;NM_006819#(-s-s-:11_S992302116899)	NM_006819#(r:11_S7664101520406)	no	no	2,3	4.9143e-06	110.98	115020000
AAALEFLNR	K	9	0	1003.55	NM_006819#(r:11_S7664101520406)	NM_006819#(r:11_S7664101520406)	no	no	1,2	3.2198e-05	160.88	6302900000
AAALEFLNRFEEAK	K	14	1	1607.83	NM_006819#(r:11_S7664101520406)	NM_006819#(r:11_S7664101520406)	no	no	2,3	1.5865e-23	188.92	415910000
AAALEFLNRFEEAKR	K	15	2	1763.93	NM_006819#(r:11_S7664101520406)	NM_006819#(r:11_S7664101520406)	no	no	4	0.00033376	76.322	9140500
AAALEQFK	R	8	0	876.471	sp|Q13423|NNTM_HUMAN;tr|E9PCX7|E9PCX7_HUMAN	sp|Q13423|NNTM_HUMAN	yes	no	2	0.0041174	102.41	312490000
AAALGGPEDEPGAAEAHFLPR	R	21	0	2075.01	tr|J3KSZ8|J3KSZ8_HUMAN;sp|Q68DK7|MSL1_HUMAN;NM_001012241#(r:17_M3892283382143);tr|J3QQY0|J3QQY0_HUMAN	tr|J3KSZ8|J3KSZ8_HUMAN	yes	no	3	2.385e-07	68.639	2883200
AAALLLQNDNNADVESK	K	17	0	1784.89	sp|Q12955-4|ANK3_HUMAN;sp|Q12955-5|ANK3_HUMAN;tr|D6RCB2|D6RCB2_HUMAN;tr|D6RHY3|D6RHY3_HUMAN;NM_020987#(-s-S-:10_A7181567102334);sp|Q12955|ANK3_HUMAN;NM_020987#(-s-:10_A6017944776334);NM_020987#(-s-:10_A6910232078583);NM_020987#(-s-:10_A6664511098957)	NM_020987#(-s-S-:10_A7181567102334)	no	no	2	3.0644e-09	85.563	5536200
AAALQYPSPSAAQDMVER	K	18	0	1903.91	sp|P56945|BCAR1_HUMAN;sp|P56945-3|BCAR1_HUMAN;NM_014567#(-s-:16_B1847627736893);tr|F5GXA2|F5GXA2_HUMAN;tr|F5H7Z0|F5H7Z0_HUMAN;tr|E9PCV2|E9PCV2_HUMAN;sp|P56945-2|BCAR1_HUMAN;tr|E9PCL5|E9PCL5_HUMAN;NM_014567#(-s-:16_B9429514434653);tr|F5H855|F5H855_HUMAN;NM_014567#(-t:16_B5828095483359);sp|P56945-4|BCAR1_HUMAN;NM_014567#(-s-:16_B9942603395203);NM_014567#(-s-s-:16_B4168934779303)	sp|P56945|BCAR1_HUMAN	yes	no	2	1.4246e-19	107.98	87215000
AAALSGGLLSDPELQR	K	16	0	1596.85	sp|Q13470-2|TNK1_HUMAN;sp|Q13470|TNK1_HUMAN;NM_003985#(r:17_T8152364664872);tr|I3L334|I3L334_HUMAN	sp|Q13470-2|TNK1_HUMAN	yes	no	2	0.07631	28.549	2474000
AAALVLQTIWGYK	R	13	0	1432.81	sp|O60716-5|CTND1_HUMAN;sp|O60716-3|CTND1_HUMAN;tr|C9JZR2|C9JZR2_HUMAN;NM_001085459#(r:11_C7067681451113);NM_001085458#(r:11_C7067681451113);sp|O60716-2|CTND1_HUMAN;sp|O60716|CTND1_HUMAN;NM_001085468#(-s-S-:11_C2747895954626);sp|O60716-8|CTND1_HUMAN;NM_001085459#(-s-e-s-:11_C4688620122519);NM_001085466#(-s-S-:11_C2747895954626);sp|O60716-7|CTND1_HUMAN;NM_001085458#(-s-e-s-:11_C4688620122519);sp|O…	sp|O60716-5|CTND1_HUMAN	yes	no	2,3	4.9046e-18	130.56	95545000
AAAMANNLQK	R	10	0	1030.52	NM_004902#(-s-:20_R3075719701859);NM_184234#(-s-:20_R3075719701859);NM_004902#(-s-:20_R2306752016711);NM_184234#(-s-:20_R2306752016711);NM_004902#(-s-:20_R8965540687346);NM_004902#(-t:20_R9893808393166);NM_004902#(-t:20_R269340458773);sp|Q14498-2|RBM39_HUMAN;NM_004902#(f-T:20_R6405413856029);NM_004902#(f-:20_R3882454870851);NM_184234#(-t:20_R9893808393166);NM_184234#(-t:20_R269340458773);sp|Q1449…	NM_004902#(-s-:20_R3075719701859)	yes	no	2	9.5217e-08	140.35	797490000
AAAMDVDTPSGTNSGAGK	M	18	0	1648.74	sp|P62877|RBX1_HUMAN;NM_014248#(f-:22_R8473586081405);NM_014248#(-t:22_R3237347833039);NM_014248#(-s-:22_R1806518167782);NM_014248#(f-:22_R3910252410932);NM_014248#(f-T:22_R5963726831638);NM_014248#(f-:22_R2880416551558);NM_014248#(-s-s-:22_R5722375104009);NM_014248#(-s-:22_R5204739660887);NM_014248#(-s-:22_R4944697924117)	sp|P62877|RBX1_HUMAN	yes	no	2	4.6863e-52	181.51	206460000
AAAMDVDTPSGTNSGAGKK	M	19	1	1776.83	sp|P62877|RBX1_HUMAN;NM_014248#(f-:22_R8473586081405);NM_014248#(-t:22_R3237347833039);NM_014248#(-s-:22_R1806518167782);NM_014248#(f-:22_R3910252410932);NM_014248#(f-T:22_R5963726831638);NM_014248#(f-:22_R2880416551558);NM_014248#(-s-s-:22_R5722375104009);NM_014248#(-s-:22_R5204739660887);NM_014248#(-s-:22_R4944697924117)	sp|P62877|RBX1_HUMAN	yes	no	2	9.96e-53	188.27	67133000
AAAMLPTVGEGYGYGPESELSQASAATR	R	28	0	2783.31	sp|Q9BQ04|RBM4B_HUMAN;tr|H0YDG8|H0YDG8_HUMAN	sp|Q9BQ04|RBM4B_HUMAN	yes	no	2,3	1.7702e-117	179.76	97271000
AAAMVPGR	M	8	0	771.406	sp|O43598|DNPH1_HUMAN;tr|H0Y8X4|H0Y8X4_HUMAN;sp|O43598-2|DNPH1_HUMAN	sp|O43598|DNPH1_HUMAN	yes	no	1,2	0.0009808	132.94	252550000
AAANEQLTR	R	9	0	972.499	sp|Q9NX63|CHCH3_HUMAN;tr|C9JRZ6|C9JRZ6_HUMAN;NM_017812#(-s-:7_C1253458952636);NM_017812#(-t:7_C4947535479474);tr|F8WAR4|F8WAR4_HUMAN;tr|G3V1K1|G3V1K1_HUMAN;NM_017812#(-t:7_C3819463443206)	sp|Q9NX63|CHCH3_HUMAN	yes	no	2	2.0646e-05	150.53	247610000
AAANLFAQTYGLTGSQDR	M	18	0	1882.92	NM_153280#(-s-s-s-s-s-s-s-s-s-s-:X_U8405715054399)	NM_153280#(-s-s-s-s-s-s-s-s-s-s-:X_U8405715054399)	yes	yes	2	9.0294e-13	87.388	60509000
AAAPAPEEEMDECEQALAAEPK	K	22	0	2356.02	sp|P26641|EF1G_HUMAN;NM_001404#(-t:11_E6488192714967);NM_001404#(-t:11_E6819426743709);tr|B4DTG2|B4DTG2_HUMAN;NM_001404#(-s-s-:11_E8104795111009);NM_001404#(r:11_E8268700737594);NM_001404#(r:11_E8203396060030);NM_001404#(-t:11_E4403876636405);NM_001404#(-t:11_E7709886551021);NM_001404#(-s-:11_E4724300811210);NM_001404#(-t:11_E1650192596767);NM_001404#(-t:11_E3596785655736);NM_001404#(-t:11_E77044…	sp|P26641|EF1G_HUMAN	yes	no	2,3,4	1.6745e-85	205.68	4119900000
AAAPAPFLPMTVL	K	13	0	1297.71	sp|P36402-5|TCF7_HUMAN;sp|P36402-6|TCF7_HUMAN;NM_001134851#(-s-e-e-e-e-S-:5_T9540498051705);NM_003202#(-t:5_T583921922328);NM_201632#(f-F-:5_T3553616422114)	sp|P36402-5|TCF7_HUMAN	yes	no	2	0.00023301	64.73	6659000
AAAPAPVSEAVCR	K	13	0	1297.64	tr|E7EQ12|E7EQ12_HUMAN;NM_001750#(f-:5_C5771279482957);NM_001750#(-t:5_C1186328863334);NM_001042442#(-t:5_C1186328863334);NM_001042441#(-t:5_C1186328863334);NM_001042440#(-t:5_C1186328863334);NM_001042443#(-t:5_C1186328863334);NM_173060#(-t:5_C1186328863334);NM_001042444#(-t:5_C1186328863334)	NM_001750#(-t:5_C1186328863334)	no	no	2,3	3.6967e-18	151.26	801440000
AAAPCIIFFDELDSLAPSR	R	19	0	2092.03	NM_000287#(-s-s-:6_P746167911992);sp|Q13608|PEX6_HUMAN;NM_000287#(-s-:6_P4752201053466);NM_000287#(-s-s-:6_P7223515424389);NM_000287#(-s-:6_P4988458714971)	NM_000287#(-s-s-:6_P746167911992)	yes	no	2	4.9436e-13	88.565	4085900
AAAPDVAPAPGPAPR	R	15	0	1356.71	NM_032369#(-s-:12_H6959379780675);sp|Q96D96-4|HVCN1_HUMAN;sp|Q96D96|HVCN1_HUMAN;tr|F8VPF7|F8VPF7_HUMAN;NM_032369#(-s-:12_H1757255456208);sp|Q96D96-3|HVCN1_HUMAN	NM_032369#(-s-:12_H6959379780675)	yes	no	2	2.9367e-06	79.886	16087000
AAAPGTLEPDAAAATPAAPSPASLPLAPGCALR	R	33	0	3052.57	sp|Q8N5W9|F101B_HUMAN	sp|Q8N5W9|F101B_HUMAN	yes	yes	3	0.0092952	40.717	4237700
AAAPGVEDEPLLR	K	13	0	1336.7	sp|P31350|RIR2_HUMAN;sp|P31350-2|RIR2_HUMAN;NM_001034#(-s-:2_R5531575038331);NM_001034#(-t:2_R2036084659441);NM_001034#(f-:2_R9422768197828);tr|C9JXC1|C9JXC1_HUMAN;NM_001034#(f-:2_R1795677023002)	sp|P31350|RIR2_HUMAN	yes	no	2,3	8.0127e-09	118.87	951230000
AAAPPSYCFVAFPPR	M	15	0	1649.8	sp|Q12765|SCRN1_HUMAN;sp|Q12765-2|SCRN1_HUMAN;tr|C9K052|C9K052_HUMAN;tr|B8ZZP4|B8ZZP4_HUMAN;tr|C9J7U9|C9J7U9_HUMAN	sp|Q12765|SCRN1_HUMAN	yes	no	2	2.136e-12	116.51	118790000
AAAQCYIDLIIK	K	12	0	1377.73	sp|P53618|COPB_HUMAN;NM_016451#(-t:11_C5054121963582);NM_016451#(-s-:11_C4714751177736);NM_016451#(-s-:11_C1953538278635);NM_016451#(f-T:11_C612947344516);NM_016451#(-t:11_C6532185880384);NM_016451#(-s-:11_C2089387808699);NM_016451#(-s-s-:11_C3818363321225);NM_016451#(-s-:11_C9354839538097);NM_016451#(f-t:11_C1142439890316);NM_016451#(-s-:11_C9180438793315);tr|E9PP73|E9PP73_HUMAN	sp|P53618|COPB_HUMAN	yes	no	2,3	1.0694e-06	108.56	1307800000
AAAQCYIDLIIKESDNNVK	K	19	1	2164.08	sp|P53618|COPB_HUMAN;NM_016451#(-t:11_C5054121963582);NM_016451#(-s-:11_C4714751177736);NM_016451#(-s-:11_C1953538278635);NM_016451#(f-T:11_C612947344516);NM_016451#(-t:11_C6532185880384);NM_016451#(-s-:11_C2089387808699);NM_016451#(-s-s-:11_C3818363321225);NM_016451#(-s-:11_C9354839538097);NM_016451#(f-t:11_C1142439890316);NM_016451#(-s-:11_C9180438793315);tr|E9PP73|E9PP73_HUMAN	sp|P53618|COPB_HUMAN	yes	no	3	0.0025247	49.537	5105500
AAAQDLGSTLFSDTVLPLAPSQPLGTPPATGMGSQAR	R	37	0	3622.83	sp|Q96N21|AP4AT_HUMAN;NM_144679#(r:17_C3658728197983)	sp|Q96N21|AP4AT_HUMAN	yes	no	3,4	9.3806e-43	112.68	15727000
AAAQLLQSQAQQSGAQQTK	K	19	0	1956	tr|D6RGI3|D6RGI3_HUMAN;sp|Q9NVA2|SEP11_HUMAN;tr|D6RER5|D6RER5_HUMAN;NM_018243#(-t:4_S3405337760612);sp|Q9NVA2-2|SEP11_HUMAN;NM_018243#(-s-:4_S637098293028);NM_018243#(-t:4_S8783220953819);NM_018243#(f-:4_S3359392285218);tr|H0Y961|H0Y961_HUMAN;tr|H0Y9G8|H0Y9G8_HUMAN	tr|D6RGI3|D6RGI3_HUMAN	yes	no	2,3	2.5444e-61	214.5	948920000
AAAQYYLGNFR	R	11	0	1272.63	sp|O95801|TTC4_HUMAN;tr|Q5TA95|Q5TA95_HUMAN;NM_004623#(-t:1_T9796335464106)	sp|O95801|TTC4_HUMAN	yes	no	2	4.5079e-12	137.95	180050000
AAASAALELPLGPAPVSVAPQAEAEAR	R	27	0	2556.35	NM_033630#(r:20_S9051181877494);NM_033630#(r:20_S631050774538);NM_033630#(r:20_S6831336341635);sp|P57086|SCND1_HUMAN	NM_033630#(r:20_S9051181877494)	yes	no	3,4	2.0486e-30	112.74	7370900
AAASGNENIQPPPLAYK	K	17	0	1739.88	sp|Q9H2M9|RBGPR_HUMAN;NM_012414#(-t:1_R7554244853741);NM_012414#(f-:1_R2253928731226);NM_012414#(-s-:1_R6294792729407);NM_012414#(-s-s-:1_R8396308549426);NM_012414#(-s-:1_R5663564466437);NM_012414#(f-:1_R5511095968453);NM_012414#(-t-f-:1_R5392572161016);tr|H7C4Y9|H7C4Y9_HUMAN	sp|Q9H2M9|RBGPR_HUMAN	yes	no	2	1.9245e-08	76.341	31887000
AAASGQPRPEMQCPAEHEEDMYR	K	23	1	2659.12	sp|Q96BN8|F105B_HUMAN	sp|Q96BN8|F105B_HUMAN	yes	yes	3,4	6.1014e-68	173.43	241100000
AAASGSVLQR	M	10	0	958.52	sp|Q5VWZ2|LYPL1_HUMAN;sp|Q5VWZ2-2|LYPL1_HUMAN;NM_138794#(f-:1_L5049483493229)	sp|Q5VWZ2|LYPL1_HUMAN	yes	no	2	7.2928e-09	157.99	147820000
AAASHLFPFEQL	K	12	0	1329.67	sp|Q01831|XPC_HUMAN;tr|E9PH69|E9PH69_HUMAN	sp|Q01831|XPC_HUMAN	no	no	2	0.00016659	69.786	21982000
AAASHPLSRK	R	10	1	1036.58	tr|H9KVB7|H9KVB7_HUMAN;sp|Q9P2N2|RHG28_HUMAN	tr|H9KVB7|H9KVB7_HUMAN	yes	no	3	0.084213	28.797	12165000
AAASIANIVK	M	10	0	956.565	NM_030752#(-s-:6_T4400455747278);tr|F5H136|F5H136_HUMAN;tr|F5H676|F5H676_HUMAN;tr|F5H726|F5H726_HUMAN	NM_030752#(-s-:6_T4400455747278)	yes	no	2	0.0011937	76.228	4885400000
AAASLAAVSGTAAASLGSAQPTDLGAHK	R	28	0	2493.28	sp|Q7Z5L9-2|I2BP2_HUMAN;sp|Q7Z5L9|I2BP2_HUMAN	sp|Q7Z5L9-2|I2BP2_HUMAN	yes	no	3,4	2.583e-118	195.3	96162000
AAASLSQPEEEQKLQPELQPK	R	21	1	2320.19	sp|Q9UNS1-2|TIM_HUMAN;sp|Q9UNS1|TIM_HUMAN;NM_003920#(r:12_T2110090244561);tr|E7EWS5|E7EWS5_HUMAN	sp|Q9UNS1-2|TIM_HUMAN	yes	no	3	6.1385e-71	211.16	8138900
AAASMGDTLSEQQLGDSDIPVIVYR	K	25	0	2635.28	sp|Q96P48-3|ARAP1_HUMAN;sp|Q96P48|ARAP1_HUMAN;NM_001040118#(f-T:11_A9641698259517);NM_001040118#(r:11_A4748861355917);NM_001040118#(-t:11_A1878814219839);tr|E7EU13|E7EU13_HUMAN;sp|Q96P48-2|ARAP1_HUMAN;sp|Q96P48-4|ARAP1_HUMAN;NM_139181#(f-T:11_A9641698259517);sp|Q96P48-1|ARAP1_HUMAN;NM_139181#(r:11_A4748861355917);sp|Q96P48-7|ARAP1_HUMAN;NM_139181#(-t:11_A1878814219839);NM_001040118#(r:11_A4612078…	sp|Q96P48-3|ARAP1_HUMAN	yes	no	2,3	1.9784e-81	155.76	16286000
AAASSPVTTLTQTMHDLAGLGSETPK	R	26	0	2583.28	NM_021872#(-s-:20_C2760005688131);sp|P30305-3|MPIP2_HUMAN;NM_021872#(f-:20_C8835507762781);NM_021873#(-s-:20_C2760005688131);sp|P30305|MPIP2_HUMAN;NM_021873#(f-:20_C8835507762781);NM_021872#(-s-:20_C3254000708629);NM_021873#(-s-:20_C3254000708629)	NM_021872#(-s-:20_C2760005688131)	yes	no	3	9.2387e-31	115.55	409230
AAASTDYYK	R	9	0	988.45	NM_000284#(f-:X_P5888397129743);sp|P08559|ODPA_HUMAN;sp|P08559-4|ODPA_HUMAN;sp|P08559-3|ODPA_HUMAN;NM_000284#(-s-:X_P4300472893526);NM_000284#(-s-:X_P9887244915564);sp|P08559-2|ODPA_HUMAN;NM_000284#(-t:X_P7553219117625);NM_000284#(-t:X_P6852094859305);NM_000284#(-s-:X_P7930174450669);NM_000284#(-s-s-:X_P5126662989664);NM_000284#(f-:X_P7863870637325)	NM_000284#(f-:X_P5888397129743)	yes	no	2	0.00094778	105.52	1807300000
AAASVLTTSMVTMEPGYLFLGSR	K	23	0	2401.2	NM_013291#(-t:8_C4150181339533);sp|Q10570|CPSF1_HUMAN;NM_013291#(r:8_C1842485020801);NM_013291#(-t:8_C221848230814);NM_013291#(-t:8_C1325813975348);NM_013291#(-s-s-s-:8_C155512617804);NM_013291#(-s-:8_C3288226126006);NM_013291#(-s-:8_C9334182359867);NM_013291#(-s-s-:8_C1061888495040);NM_013291#(r:8_C5623236079540);NM_013291#(rr:8_C3858138821961);NM_013291#(r:8_C6415476860641);NM_013291#(r:8_C6320…	NM_013291#(-t:8_C4150181339533)	yes	no	3	8.8391e-07	75.773	8058100
AAASVMCHIEPDDGDDFVR	R	19	0	2103.9	sp|Q5JUR7|TEX30_HUMAN	sp|Q5JUR7|TEX30_HUMAN	yes	yes	3	2.0021e-28	117.65	25415000
AAASVTPPGSLELLQPGFSK	M	20	0	1969.05	sp|Q12933-3|TRAF2_HUMAN;sp|Q12933|TRAF2_HUMAN;sp|Q12933-2|TRAF2_HUMAN;sp|Q12933-4|TRAF2_HUMAN;NM_021138#(f-:9_T7569850943556);NM_021138#(f-T:9_T503456865597);NM_021138#(-s-:9_T9388924444229);tr|B1AMX9|B1AMX9_HUMAN;tr|B1AMX8|B1AMX8_HUMAN;tr|B1AMX7|B1AMX7_HUMAN;tr|B1AMY1|B1AMY1_HUMAN	sp|Q12933-3|TRAF2_HUMAN	yes	no	2,3	1.2985e-12	106.75	77189000
AAATAEEPDPK	K	11	0	1098.52	NM_005969#(-t:11_N4462868223379);tr|C9JZI7|C9JZI7_HUMAN;tr|E9PKT8|E9PKT8_HUMAN;tr|H0YCI4|H0YCI4_HUMAN;NM_005969#(-s-s-:11_N7883472722480);NM_005969#(-s-s-s-:11_N2433191688490);NM_005969#(-s-s-s-s-:11_N9803887403928);NM_005969#(-s-s-s-:11_N7076919997059);NM_005969#(-s-s-:11_N441600180791);NM_005969#(-s-:11_N7553289915642);NM_005969#(-s-s-:11_N8357709186770);NM_005969#(-s-:11_N9072873017667);NM_005…	NM_005969#(-s-s-:11_N7883472722480)	no	no	2	0.068355	37.144	12982000
AAATGAVAASAASGQAEGK	M	19	0	1587.79	sp|Q9NWH9|SLTM_HUMAN;NM_024755#(-s-:15_S4514128008124);NM_001013843#(-s-:15_S4514128008124);NM_024755#(-s-:15_S3259864578162);NM_024755#(r:15_S7982748398050);NM_001013843#(-s-:15_S3259864578162);NM_001013843#(r:15_S7982748398050);tr|H7BXE3|H7BXE3_HUMAN;tr|H0YL55|H0YL55_HUMAN;tr|H0YLE6|H0YLE6_HUMAN;tr|H0YNF3|H0YNF3_HUMAN;tr|H0YMR6|H0YMR6_HUMAN;tr|H0YMW8|H0YMW8_HUMAN;tr|H0YLW7|H0YLW7_HUMAN	sp|Q9NWH9|SLTM_HUMAN	yes	no	2	6.541e-55	202.35	123480000
AAATGAVAASAASGQAEGKK	M	20	1	1715.88	sp|Q9NWH9|SLTM_HUMAN;NM_024755#(-s-:15_S4514128008124);NM_001013843#(-s-:15_S4514128008124);NM_024755#(-s-:15_S3259864578162);NM_024755#(r:15_S7982748398050);NM_001013843#(-s-:15_S3259864578162);NM_001013843#(r:15_S7982748398050);tr|H7BXE3|H7BXE3_HUMAN;tr|H0YL55|H0YL55_HUMAN;tr|H0YLE6|H0YLE6_HUMAN;tr|H0YNF3|H0YNF3_HUMAN;tr|H0YMR6|H0YMR6_HUMAN;tr|H0YMW8|H0YMW8_HUMAN;tr|H0YLW7|H0YLW7_HUMAN	sp|Q9NWH9|SLTM_HUMAN	yes	no	2	2.0436e-50	184.15	4893500
AAATGLPEGPAVPVPSR	K	17	0	1588.86	tr|J3KRX2|J3KRX2_HUMAN;tr|J3QS49|J3QS49_HUMAN;sp|Q8N1S5-2|S39AB_HUMAN;tr|J3QLB2|J3QLB2_HUMAN;sp|Q8N1S5|S39AB_HUMAN;tr|J3QQP1|J3QQP1_HUMAN;tr|J3KS66|J3KS66_HUMAN	tr|J3KRX2|J3KRX2_HUMAN	yes	no	2	1.0732e-13	103.04	121060000
AAATGPSFWLGNETLK	M	16	0	1661.84	sp|P12955|PEPD_HUMAN;sp|P12955-3|PEPD_HUMAN;sp|P12955-2|PEPD_HUMAN	sp|P12955|PEPD_HUMAN	yes	no	2	6.1322e-30	159.22	397870000
AAATIDSLASR	R	11	0	1074.57	sp|Q9NVC6|MED17_HUMAN;NM_004268#(-s-:11_M3651468564241)	sp|Q9NVC6|MED17_HUMAN	yes	no	2	0.0012723	65.179	38563000
AAATIVHDTSEAVELCPAYGLYLKPITK	M	28	1	3030.57	NM_005088#(r:X_S6127636598725);sp|Q02040|AK17A_HUMAN;NM_005088#(-t:X_S9919737548748);sp|Q02040-2|AK17A_HUMAN;sp|Q02040-3|AK17A_HUMAN;NM_005088#(r:X_S17666702105)	NM_005088#(r:X_S6127636598725)	yes	no	3,4	1.6298e-66	173.35	163370000
AAATKKPAPEK	K	11	2	1110.64	sp|P36578|RL4_HUMAN;NM_000968#(f-:15_R886591974770);NM_000968#(r:15_R7635005758227);NM_000968#(r:15_R6116696733344);NM_000968#(-t:15_R3982785077533);NM_000968#(-s-:15_R1052402022736);NM_000968#(-t:15_R8606071997271);NM_000968#(-s-s-:15_R7568255917089);tr|H3BM89|H3BM89_HUMAN;NM_000968#(f-:15_R5529369440384);NM_000968#(r:15_R9443664123295);NM_000968#(-s-s-:15_R3424638300180);NM_000968#(-s-s-s-s-:15…	sp|P36578|RL4_HUMAN	yes	no	3	1.4888e-05	132.86	31063000
AAATLTSK	M	8	0	761.428	sp|Q9UDW1|QCR9_HUMAN;sp|Q9UDW1-2|QCR9_HUMAN	sp|Q9UDW1|QCR9_HUMAN	yes	no	2	0.0033242	114.5	336540000
AAATMATPLPGR	R	12	0	1155.61	tr|J9JID7|J9JID7_HUMAN;NM_032737#(-t:19_L354180231063);NM_032737#(-t:19_L40888352132);NM_032737#(-s-:19_L7758578635394);NM_032737#(-s-:19_L2224242434816);NM_032737#(r:19_L1009810044388);NM_032737#(-s-:19_L2575570514098);NM_032737#(-t:19_L2562288670642);NM_032737#(-s-s-:19_L74249690615);NM_032737#(-s-:19_L4348032923443);NM_032737#(-s-:19_L4454874847906);NM_032737#(f-:19_L7322621713465);NM_032737#(…	tr|J9JID7|J9JID7_HUMAN	no	no	2	5.4853e-16	159.94	40065000
AAATPAKK	K	8	1	756.449	NM_005381#(-t:2_N1496125642353);NM_005381#(f-t:2_N5078851064966);NM_005381#(f-:2_N8833909843270);NM_005381#(-t:2_N8622516379151);NM_005381#(r:2_N380020911730);NM_005381#(-t:2_N8976627060765);NM_005381#(-t:2_N2019929968559);NM_005381#(-t:2_N1556431297860);NM_005381#(-t:2_N2693641040970);sp|P19338|NUCL_HUMAN;NM_005381#(-t:2_N268567601631);NM_005381#(f-:2_N4395329291144);NM_005381#(f-:2_N66941539533…	NM_005381#(-t:2_N1496125642353)	no	no	2	0.005196	91.318	4007300
AAATPESQEPQAK	K	13	0	1326.64	sp|P49006|MRP_HUMAN	sp|P49006|MRP_HUMAN	yes	yes	2	1.0149e-15	142.97	110300000
AAATTAQEYLK	K	11	0	1165.6	sp|P09327|VILI_HUMAN;NM_007127#(r:2_V763061930859);NM_007127#(-s-:2_V7280516674302);NM_007127#(-s-s-:2_V2050855218037);NM_007127#(-s-:2_V8647751749058);NM_007127#(-s-:2_V3817739920751);NM_007127#(-s-:2_V5855984630095);NM_007127#(-s-s-:2_V4767313272570);NM_007127#(-s-s-:2_V5117407547038);NM_007127#(-s-s-:2_V498785701813);NM_007127#(-s-s-s-:2_V8194890418400);NM_007127#(-s-:2_V5717097778395);NM_0071…	sp|P09327|VILI_HUMAN	yes	no	2	1.6282e-06	122.69	156390000
AAATTSQPVLTSQQIETIFFK	K	21	0	2280.2	NM_021574#(-s-:22_B3791828531470);NM_004327#(-s-:22_B3791828531470);sp|P11274-2|BCR_HUMAN;NM_021574#(-t:22_B9367906932108);sp|P11274|BCR_HUMAN;NM_004327#(-t:22_B9367906932108);NM_021574#(-s-s-:22_B4076130035276);NM_021574#(-s-s-s-:22_B7190000441862);NM_004327#(-s-s-:22_B4076130035276);NM_021574#(-s-:22_B4881216902960);NM_004327#(-s-s-s-:22_B7190000441862);NM_021574#(-s-s-:22_B4689120110997);NM_00…	NM_021574#(-s-:22_B3791828531470)	yes	no	2,3	3.1625e-43	130.56	34863000
AAAVAAAGAGEPQSPDELLPK	M	21	0	1962.01	sp|Q9NS69|TOM22_HUMAN	sp|Q9NS69|TOM22_HUMAN	yes	yes	2,3	3.5437e-24	129.46	2011600000
AAAVAAPLAAGGEEAAATTSVPGSPGLPGR	M	30	0	2616.35	NM_002319#(-s-s-:7_L5140300206880);NM_002319#(-s-:7_L1649543409891);sp|O75427|LRCH4_HUMAN;NM_002319#(r:7_L7497521445435);NM_002319#(r:7_L2292226979680);NM_002319#(r:7_L8599269870450);NM_002319#(rr:7_L4829225291141);NM_002319#(r:7_L6236038173031);NM_002319#(-s-:7_L5518700038135)	NM_002319#(-s-s-:7_L5140300206880)	yes	no	3	0.044683	42.885	8998300
AAAVALFNLDIR	R	12	0	1272.72	sp|Q9NXC5|MIO_HUMAN;sp|Q9NXC5-2|MIO_HUMAN	sp|Q9NXC5|MIO_HUMAN	yes	no	2	2.3689e-06	89.301	422830
AAAVAVAAASR	M	11	0	956.54	sp|Q7Z5L9-2|I2BP2_HUMAN;sp|Q7Z5L9|I2BP2_HUMAN	sp|Q7Z5L9-2|I2BP2_HUMAN	yes	no	2	0.0015421	73.632	2038700
AAAVDFTAR	R	9	0	920.472	sp|Q12955-4|ANK3_HUMAN;sp|Q12955-5|ANK3_HUMAN;tr|D6RCB2|D6RCB2_HUMAN;tr|D6RHY3|D6RHY3_HUMAN;NM_020987#(-s-S-:10_A7181567102334);sp|Q12955|ANK3_HUMAN;NM_020987#(-s-:10_A6017944776334);NM_020987#(-s-:10_A6910232078583);NM_020987#(-s-:10_A6664511098957)	NM_020987#(-s-S-:10_A7181567102334)	no	no	2	0.0057426	67.414	130960000
AAAVGGR	R	7	0	600.334	NM_001087#(-s-s-s-:2_A9741542742532);NM_001087#(-s-s-s-s-:2_A6144081092409);NM_001087#(-s-s-s-s-s-s-:2_A5595162182841)	NM_001087#(-s-s-s-:2_A9741542742532)	yes	no	2	0.017914	91.584	49079000
AAAVGIYEQYLSEK	R	14	0	1540.78	NM_015132#(-s-:7_S6057237274567);tr|B8ZZT9|B8ZZT9_HUMAN;NM_015132#(f-:7_S2670567345317);sp|Q9Y5W8-2|SNX13_HUMAN;sp|Q9Y5W8|SNX13_HUMAN;NM_015132#(-t:7_S5305547463844);NM_015132#(-t-e-e-f-:7_S6921261959682);NM_015132#(f-T:7_S2183721367777);NM_015132#(-t:7_S7803208681380)	NM_015132#(-s-:7_S6057237274567)	yes	no	2	2.9373e-06	60.968	947550
AAAVGTANK	K	9	0	801.434	NM_003373#(-s-:10_V7808343453743);NM_014000#(-s-:10_V7808343453743);NM_003373#(-s-s-:10_V4946397173805);NM_014000#(-s-s-:10_V4946397173805);NM_003373#(-s-s-s-:10_V7544549772803);NM_014000#(-s-s-s-:10_V7544549772803);NM_003373#(-s-s-s-s-:10_V9783051377797);NM_014000#(-s-s-s-s-:10_V9783051377797);NM_003373#(-s-s-s-s-s-:10_V2193193708518);NM_014000#(-s-s-s-s-s-:10_V2193193708518);tr|Q5JQ13|Q5JQ13_HU…	sp|P18206-2|VINC_HUMAN	no	no	2	0.053467	56.916	278690
AAAVHTAIR	R	9	0	908.519	sp|Q8IYI6|EXOC8_HUMAN	sp|Q8IYI6|EXOC8_HUMAN	yes	yes	2,3	0.0027914	77.732	155470000
AAAVLPVLDLAQR	K	13	0	1335.79	NM_021074#(-t:18_N9984695119565);NM_021074#(-t:18_N4364527941182);sp|P19404|NDUV2_HUMAN;tr|E7EPT4|E7EPT4_HUMAN;NM_021074#(-s-:18_N1918526538287);NM_021074#(f-:18_N4606397130835)	NM_021074#(-t:18_N9984695119565)	yes	no	2,3	3.2145e-18	154.15	2034500000
AAAVLSGPSAGSAAGVPGGTGGLSAVSSGPR	M	31	0	2565.31	sp|Q8IZL8|PELP1_HUMAN;tr|C9JFV4|C9JFV4_HUMAN;sp|Q8IZL8-2|PELP1_HUMAN;tr|F8WDZ1|F8WDZ1_HUMAN;tr|I3L4M7|I3L4M7_HUMAN	sp|Q8IZL8|PELP1_HUMAN	yes	no	2,3,4	1.7725e-13	103.85	215600000
AAAVPVEFQEHHLSEVQNMASEEK	K	24	0	2679.26	NM_006899#(-s-:20_I5132070166332);NM_006899#(f-:20_I595288355286);sp|O43837|IDH3B_HUMAN;NM_006899#(r:20_I7195975108104);NM_006899#(r:20_I9978258702232);NM_006899#(f-:20_I7278581438581);NM_006899#(-t:20_I222054373913);NM_006899#(f-:20_I5488537966188);NM_174855#(-s-:20_I5132070166332);NM_174855#(-t:20_I2589986004099);NM_174855#(-t:20_I2337748614667);NM_174855#(f-:20_I595288355286);sp|O43837-2|IDH3B…	NM_006899#(-s-:20_I5132070166332)	yes	no	3,4	4.9864e-79	161.04	1421900000
AAAVPVEFQEHHLSEVQNMASEEKLEQVLSSMK	K	33	1	3694.8	NM_006899#(-s-:20_I5132070166332);NM_006899#(f-:20_I595288355286);sp|O43837|IDH3B_HUMAN;NM_006899#(r:20_I7195975108104);NM_006899#(r:20_I9978258702232);NM_006899#(f-:20_I7278581438581);NM_006899#(-t:20_I222054373913);NM_006899#(f-:20_I5488537966188);NM_174855#(-s-:20_I5132070166332);NM_174855#(-t:20_I2589986004099);NM_174855#(-t:20_I2337748614667);NM_174855#(f-:20_I595288355286);sp|O43837-2|IDH3B…	NM_006899#(-s-:20_I5132070166332)	yes	no	4,5	1.6979e-25	112.26	116170000
AAAVQADDVEVLK	R	13	0	1327.7	NM_001080453#(f-:7_I2919926511611);sp|Q8N201|INT1_HUMAN;NM_001080453#(f-T:7_I408458528676);NM_001080453#(-s-s-:7_I2162884500049);tr|A4D212|A4D212_HUMAN;NM_001080453#(-s-s-s-:7_I823726600728);NM_001080453#(-s-s-s-s-s-s-:7_I8806988748202);NM_001080453#(-s-s-s-s-:7_I7576298427749);NM_001080453#(-s-s-s-s-:7_I1667256543638);NM_001080453#(-s-s-:7_I6481831315713);NM_001080453#(-s-s-s-s-s-s-s-s-:7_I45660…	NM_001080453#(f-:7_I2919926511611)	no	no	2	1.62e-06	91.62	154960000
AAAVSALAK	R	9	0	800.476	sp|Q9UBF2|COPG2_HUMAN	sp|Q9UBF2|COPG2_HUMAN	yes	yes	2	0.037469	48.091	13164000
AAAVSEAEADFYEQNSR	R	17	0	1856.82	sp|P54802|ANAG_HUMAN;NM_000263#(-s-:17_N9657871713918);NM_000263#(-s-:17_N9159641797794)	sp|P54802|ANAG_HUMAN	yes	no	2,3	1.6175e-31	148.24	16979000
AAAVSLENVLLDVK	K	14	0	1440.82	tr|F8W1F5|F8W1F5_HUMAN;sp|Q8IVF7|FMNL3_HUMAN;sp|Q8IVF7-2|FMNL3_HUMAN;sp|Q8IVF7-3|FMNL3_HUMAN;NM_052905#(-s-:2_F1877447974078);sp|Q96PY5|FMNL2_HUMAN;tr|C9IZY8|C9IZY8_HUMAN	NM_052905#(-s-:2_F1877447974078)	no	no	2,3	1.2994e-17	141.54	42410000
AAAVSSGFDGAIQLVSLGGR	R	20	0	1874.98	NM_198576#(-s-s-s-:1_A5307778478567);NM_198576#(-s-s-:1_A2774387809777);NM_198576#(-s-:1_A2218360030767);NM_198576#(-s-:1_A3943694207185);sp|O00468-6|AGRIN_HUMAN;NM_198576#(f-:1_A3624878058481);NM_198576#(-t:1_A299127181627);sp|O00468-3|AGRIN_HUMAN;NM_198576#(f-:1_A5442841158454);NM_198576#(-s-s-s-s-s-:1_A9671306720725);NM_198576#(-s-s-s-s-:1_A7959717179257);NM_198576#(-s-s-s-s-:1_A2941903017521)…	NM_198576#(-s-s-s-:1_A5307778478567)	yes	no	3	0.091227	19.912	1750200
AAAVSSVVR	M	9	0	858.492	sp|A6NDU8|CE051_HUMAN	sp|A6NDU8|CE051_HUMAN	yes	yes	2	0.011684	64.841	31900000
AAAVVGINSETIMK	R	14	0	1402.75	NM_006636#(-t:2_M4339876884973);sp|P13995|MTDC_HUMAN;NM_006636#(f-t:2_M8225114108163);NM_006636#(f-:2_M9770941042651);NM_006636#(-s-:2_M7864985577671)	NM_006636#(-t:2_M4339876884973)	yes	no	2	0.0026477	51.726	50788000
AAAVVGINSETIMKPASISEEELLNLINK	R	29	1	3053.63	NM_006636#(-t:2_M4339876884973);sp|P13995|MTDC_HUMAN;NM_006636#(f-t:2_M8225114108163);NM_006636#(f-:2_M9770941042651);NM_006636#(-s-:2_M7864985577671)	NM_006636#(-t:2_M4339876884973)	yes	no	3,4,5	4.7535e-143	253.67	734330000
AAAWGGHEDIVLNLLQHGAEVNK	R	23	0	2441.25	sp|Q9ULJ7-2|ANR50_HUMAN;sp|Q9ULJ7|ANR50_HUMAN	sp|Q9ULJ7-2|ANR50_HUMAN	yes	no	3,4	6.5805e-32	121.25	45140000
AAAYDISEDEED	K	12	0	1326.51	sp|P49585|PCY1A_HUMAN;tr|B4E322|B4E322_HUMAN	sp|P49585|PCY1A_HUMAN	yes	no	2	0.067687	32.254	1483500
AAAYDLLVEMVK	R	12	0	1321.7	sp|Q70CQ2|UBP34_HUMAN;NM_014709#(r:2_U5901065293146);sp|Q70CQ2-2|UBP34_HUMAN;NM_014709#(r:2_U4622446984312);sp|Q70CQ2-3|UBP34_HUMAN;NM_014709#(r:2_U167955155919)	sp|Q70CQ2|UBP34_HUMAN	yes	no	2,3	9.2306e-05	65.179	26241000
AAAYLDPNLNHTPNSSTK	M	18	0	1912.93	tr|Q8IYN9|Q8IYN9_HUMAN;NM_153831#(f-:8_P2159817950288);sp|Q05397|FAK1_HUMAN;sp|Q05397-5|FAK1_HUMAN;NM_153831#(-s-s-:8_P8685368795464);tr|H0YBP1|H0YBP1_HUMAN;NM_153831#(-s-:8_P1957350789961);NM_153831#(-t:8_P5721205398564);tr|J3QT16|J3QT16_HUMAN;tr|E7ESA6|E7ESA6_HUMAN;NM_153831#(-s-s-:8_P9026105180217);NM_153831#(-s-s-s-:8_P3647019275764);NM_153831#(-s-s-s-s-:8_P8130512545923);NM_153831#(-s-s-s-:8…	tr|Q8IYN9|Q8IYN9_HUMAN	yes	no	2,3	4.3108e-43	167.29	44272000
AAAYNLVQHGITNLCVIGGDGSLTGANIFR	R	30	0	3101.57	NM_002626#(-s-:21_P8925503908491);sp|P17858|K6PL_HUMAN;NM_002626#(-s-:21_P2990352903129);NM_002626#(-s-:21_P2151623144479);NM_002626#(-t:21_P1739141516134);sp|P17858-2|K6PL_HUMAN;NM_002626#(-s-s-:21_P8050142067328);NM_002626#(-s-s-s-:21_P272202756947);NM_002626#(-s-:21_P8805306407661);NM_002626#(-s-s-:21_P6676210527093);NM_002626#(-s-:21_P7680949905663);NM_002626#(-s-:21_P3631845973999);NM_002626…	NM_002626#(-s-:21_P8925503908491)	yes	no	3,4	1.2672e-37	114.2	116800000
AAAYSAQVQPVDGATR	R	16	0	1603.8	NM_023080#(-t:8_C4193244208242);sp|Q9H7E9|CH033_HUMAN;sp|Q9H7E9-2|CH033_HUMAN;NM_023080#(rr:8_C5089094735184)	NM_023080#(-t:8_C4193244208242)	yes	no	2	8.178e-38	165.34	18190000
AACCLAGAR	R	9	0	948.427	sp|O95336|6PGL_HUMAN;tr|M0R261|M0R261_HUMAN;tr|M0R0U3|M0R0U3_HUMAN;NM_012088#(-s-:19_P7153048353071)	sp|O95336|6PGL_HUMAN	yes	no	2	0.0010391	98.904	261190000
AACDLVR	R	7	0	803.396	NM_001316#(-t:20_C3819328198146);sp|P55060-3|XPO2_HUMAN;NM_001316#(f-T:20_C5969978294347);sp|P55060|XPO2_HUMAN;NM_001316#(-t:20_C1738167973710);NM_001316#(f-T:20_C8549154813296);tr|F8W904|F8W904_HUMAN;NM_001316#(f-:20_C5742475750137);NM_001316#(-t:20_C757719191970);NM_001316#(f-T:20_C6775741172695);NM_001316#(f-:20_C1586029435450);tr|B4DUC5|B4DUC5_HUMAN;NM_001316#(-t:20_C3322343151791);NM_001316#…	NM_001316#(-t:20_C3819328198146)	no	no	2	0.0033242	130.05	733150000
AACEQQAVALTLQEDR	R	16	0	1801.86	sp|Q9BUH6|CI142_HUMAN;NM_183241#(-t:9_C2221190816736);NM_183241#(-t:9_C6134307094030);NM_183241#(r:9_C635485241092);NM_183241#(-s-:9_C1116128092047)	sp|Q9BUH6|CI142_HUMAN	yes	no	2,3	2.4384e-39	162.79	25566000
AACFAIQK	R	8	0	907.459	sp|O15269|SPTC1_HUMAN;NM_006415#(-t:9_S4545636505432);NM_006415#(-s-:9_S8079634181105);NM_006415#(-s-:9_S664013619593);NM_006415#(f-:9_S5983408007793)	sp|O15269|SPTC1_HUMAN	yes	no	2	0.0029883	112.59	124820000
AACGAVLLTELLER	R	14	0	1514.81	sp|Q8N697|S15A4_HUMAN	sp|Q8N697|S15A4_HUMAN	yes	yes	2,3	1.0037e-12	119.39	16644000
AACHLKLEDYDKAETEASK	R	19	2	2178.03	sp|Q9H3U1-2|UN45A_HUMAN;NM_001039675#(-s-:15_U4205739839471);sp|Q9H3U1|UN45A_HUMAN;NM_018671#(-s-:15_U4205739839471)	sp|Q9H3U1-2|UN45A_HUMAN	yes	no	4,5	3.6513e-53	197.1	8398400
AACICAEEEKEEL	R	13	1	1550.66	sp|Q9BX93|PG12B_HUMAN	sp|Q9BX93|PG12B_HUMAN	yes	yes	2	0.069551	46.643	3324600
AACILTSQTLMR	K	12	0	1363.7	sp|Q9P265|DIP2B_HUMAN	sp|Q9P265|DIP2B_HUMAN	yes	yes	2	8.0152e-05	72.29	20166000
AACLCFR	R	7	0	896.4	sp|Q9NZJ9|NUDT4_HUMAN;NM_019094#(-s-:12_N7713312335356);sp|O95989|NUDT3_HUMAN;NM_006703#(-s-:6_N8081388305119);NM_006703#(-s-:6_N7882646522795);NM_006703#(-s-s-:6_N1236116662133);NM_006703#(-s-:6_N3963859595780);NM_006703#(-s-s-:6_N5905158777063);sp|Q8NFP7|NUD10_HUMAN;sp|Q9NZJ9-2|NUDT4_HUMAN;NM_199040#(-s-:12_N7713312335356);sp|Q96G61|NUD11_HUMAN	sp|Q9NZJ9-2|NUDT4_HUMAN	no	no	2	0.0061058	121.68	386100000
AACLDILILR	K	10	0	1156.66	sp|P10276-2|RARA_HUMAN;sp|P10276|RARA_HUMAN;tr|A8MUP8|A8MUP8_HUMAN;sp|P10276-3|RARA_HUMAN;tr|J3KSJ4|J3KSJ4_HUMAN;tr|D6RBI3|D6RBI3_HUMAN;NM_000965#(f-T:3_R9956793236442);sp|P10826-2|RARB_HUMAN;sp|P10826|RARB_HUMAN;NM_016152#(f-:3_R6170996129219);NM_016152#(-t:3_R5305238261806);NM_016152#(f-T:3_R9956793236442);sp|P10826-3|RARB_HUMAN	sp|P10276-2|RARA_HUMAN	yes	no	2	0.00071599	76.228	4529500
AACLLDGVPVALK	R	13	0	1325.74	sp|Q8TDX7|NEK7_HUMAN;tr|F8WAG2|F8WAG2_HUMAN;sp|Q8TDX7-2|NEK7_HUMAN	sp|Q8TDX7|NEK7_HUMAN	yes	no	2,3	0.0010565	56.414	204520000
AACLLDGVPVALKK	R	14	1	1453.83	sp|Q8TDX7|NEK7_HUMAN;tr|F8WAG2|F8WAG2_HUMAN;sp|Q8TDX7-2|NEK7_HUMAN	sp|Q8TDX7|NEK7_HUMAN	yes	no	2,3	1.0792e-08	110.92	52677000
AACLPLPGYR	K	10	0	1116.58	NM_002298#(-t:13_L1935051262727);sp|P13796|PLSL_HUMAN;NM_002298#(-s-:13_L7415839860543);NM_002298#(-s-:13_L8277914671199);tr|Q5TBN3|Q5TBN3_HUMAN;tr|Q5TBN5|Q5TBN5_HUMAN	NM_002298#(-t:13_L1935051262727)	yes	no	2	0.00018424	98.582	1789800000
AACNLLQR	K	8	0	944.486	NM_002627#(-s-:10_P9713959168146);NM_002627#(f-:10_P4616954184326);sp|Q01813|K6PP_HUMAN;NM_002627#(-s-S-:10_P8033179338799);NM_002627#(-s-:10_P6835152241049);NM_002627#(-t:10_P1168210446214);NM_002627#(-s-:10_P8476192377352);NM_002627#(-t:10_P4778297039952);NM_002627#(-s-s-:10_P6303792667595);NM_002627#(-s-:10_P6962305339801);NM_002627#(-s-:10_P7023111867631);NM_002627#(-s-:10_P681603472994);NM_0…	NM_002627#(-s-:10_P9713959168146)	yes	no	2	0.00037736	146.21	1143600000
AACQCVEPIK	K	10	0	1174.55	NM_015029#(-t:8_P5244121755241);sp|Q99575|POP1_HUMAN	NM_015029#(-t:8_P5244121755241)	yes	no	2	0.0006733	76.228	41233000
AACQEAQVFGNQLIPPNAQVK	R	21	0	2282.15	sp|Q53H12|AGK_HUMAN;NM_018238#(f-T:7_A3595391735288);tr|E9PC15|E9PC15_HUMAN;NM_018238#(f-:7_A7943364333567);NM_018238#(-t:7_A4610911553321);NM_018238#(-t:7_A6777537781124);tr|E9PG39|E9PG39_HUMAN	sp|Q53H12|AGK_HUMAN	yes	no	2,3	1.2034e-16	97.256	218030000
AACQEAQVFGNQLIPPNAQVKK	R	22	1	2410.24	sp|Q53H12|AGK_HUMAN;NM_018238#(f-T:7_A3595391735288);tr|E9PC15|E9PC15_HUMAN;NM_018238#(f-:7_A7943364333567);NM_018238#(-t:7_A4610911553321);NM_018238#(-t:7_A6777537781124);tr|E9PG39|E9PG39_HUMAN	sp|Q53H12|AGK_HUMAN	yes	no	3	0.088516	13.13	480890
AACYFTMGLYEK	R	12	0	1452.64	sp|Q9UGR2-2|Z3H7B_HUMAN;sp|Q9UGR2|Z3H7B_HUMAN	sp|Q9UGR2-2|Z3H7B_HUMAN	yes	no	2	7.4185e-05	71.268	11712000
AADAAGPGCPR	R	11	0	1041.47	sp|Q8NCN4|RN169_HUMAN	sp|Q8NCN4|RN169_HUMAN	yes	yes	2	0.00050762	73.499	311420
AADAPFVINAIIR	R	13	0	1369.77	tr|H3BTN6|H3BTN6_HUMAN;sp|Q9H6L2|TM231_HUMAN;NM_001077418#(-s-:16_F6807479809481);sp|Q9H6L2-2|TM231_HUMAN;sp|Q9H6L2-3|TM231_HUMAN;NM_001077416#(-s-:16_F6807479809481)	tr|H3BTN6|H3BTN6_HUMAN	yes	no	2	0.00015679	66.393	53202000
AADAVEDLR	R	9	0	958.472	sp|Q9UNF0|PACN2_HUMAN;NM_007229#(-s-:22_P8309238161297);sp|Q9UNF0-2|PACN2_HUMAN;NM_007229#(-t:22_P741311452625);NM_007229#(-t:22_P1226170651529);NM_007229#(f-T:22_P5049096329020);NM_007229#(f-:22_P697697896425);NM_007229#(-t-e-f-:22_P7312668004046)	sp|Q9UNF0|PACN2_HUMAN	yes	no	2	0.000183	163.32	97563000
AADCDLQITNAQTK	K	14	0	1547.72	sp|Q7Z6E9|RBBP6_HUMAN;sp|Q7Z6E9-2|RBBP6_HUMAN;NM_006910#(-t:16_R1729410186818);NM_006910#(f-:16_R5491400052942);NM_006910#(f-t:16_R1295458794071);NM_018703#(-t:16_R1729410186818);NM_018703#(f-:16_R5491400052942);NM_018703#(f-t:16_R1295458794071);sp|Q7Z6E9-4|RBBP6_HUMAN;tr|H3BUN0|H3BUN0_HUMAN;tr|I3L3Y2|I3L3Y2_HUMAN;sp|Q7Z6E9-3|RBBP6_HUMAN	sp|Q7Z6E9|RBBP6_HUMAN	yes	no	2	6.3469e-08	95.981	26117000
AADCDLQITNAQTKEEYTDDNALIPK	K	26	1	2936.37	sp|Q7Z6E9|RBBP6_HUMAN;sp|Q7Z6E9-2|RBBP6_HUMAN;NM_006910#(-t:16_R1729410186818);NM_006910#(f-:16_R5491400052942);NM_006910#(f-t:16_R1295458794071);NM_018703#(-t:16_R1729410186818);NM_018703#(f-:16_R5491400052942);NM_018703#(f-t:16_R1295458794071);sp|Q7Z6E9-4|RBBP6_HUMAN;tr|H3BUN0|H3BUN0_HUMAN;tr|I3L3Y2|I3L3Y2_HUMAN;sp|Q7Z6E9-3|RBBP6_HUMAN	sp|Q7Z6E9|RBBP6_HUMAN	yes	no	3	1.1245e-99	192.75	8523600
AADCEVEQWDSDEPIPAK	R	18	0	2058.88	tr|Q5T946|Q5T946_HUMAN	tr|Q5T946|Q5T946_HUMAN	no	no	2,3,4	7.4197e-52	161.91	66051000
AADCEVEQWDSDEPIPAKELER	R	22	1	2586.15	tr|Q5T946|Q5T946_HUMAN	tr|Q5T946|Q5T946_HUMAN	no	no	2,3	2.227e-85	205.02	24611000
AADCISEPVNR	K	11	0	1230.57	NM_001083112#(-s-:2_G791132274432);sp|P43304|GPDM_HUMAN;tr|F5GYK7|F5GYK7_HUMAN;tr|E7EM56|E7EM56_HUMAN	NM_001083112#(-s-:2_G791132274432)	yes	no	2	0.00046856	69.721	75419000
AADDTWEPFASGK	K	13	0	1393.62	NM_000371#(f-:18_T1042514817825);sp|P02766|TTHY_HUMAN;NM_000371#(f-t:18_T6361001007017);NM_000371#(f-:18_T8246364327528);NM_000371#(-t:18_T4464948806470);NM_000371#(f-:18_T1831631725041)	NM_000371#(f-:18_T1042514817825)	yes	no	2	4.4711e-06	83.204	3789900
AADEALNAMTSNGSHR	R	16	0	1643.73	sp|Q13586|STIM1_HUMAN;NM_003156#(-s-:11_S5499245667577);NM_003156#(-t:11_S9214427582644);tr|E9PNJ4|E9PNJ4_HUMAN;tr|H0YDB2|H0YDB2_HUMAN	sp|Q13586|STIM1_HUMAN	yes	no	3	0.0004689	37.438	4379300
AADEAMEER	K	9	0	1020.42	sp|Q9NXH9|TRM1_HUMAN;NM_017722#(r:19_T288495988550);sp|Q9NXH9-2|TRM1_HUMAN;NM_017722#(-s-s-s-:19_T4464532224170);NM_017722#(-s-s-:19_T7571971985305);NM_017722#(-s-:19_T7318566026233);NM_017722#(-s-:19_T8206555904265);NM_017722#(-s-s-s-s-:19_T111735746553);NM_017722#(-s-s-s-:19_T9850539730222);NM_017722#(-s-s-:19_T9774133810814);NM_017722#(-s-s-s-s-:19_T2261481225920);NM_017722#(-s-s-s-:19_T334805…	sp|Q9NXH9|TRM1_HUMAN	no	no	2	0.0045405	67.334	795370
AADEEAFEDNSEEYIR	R	16	0	1886.78	NM_001316#(-t:20_C3819328198146);sp|P55060-3|XPO2_HUMAN;NM_001316#(f-T:20_C5969978294347);sp|P55060|XPO2_HUMAN;NM_001316#(-t:20_C1738167973710);NM_001316#(f-T:20_C8549154813296);tr|F8W904|F8W904_HUMAN;NM_001316#(f-:20_C5742475750137);NM_001316#(-t:20_C757719191970);NM_001316#(f-T:20_C6775741172695);NM_001316#(f-:20_C1586029435450);tr|B4DUC5|B4DUC5_HUMAN;NM_001316#(-t:20_C3322343151791);NM_001316#…	NM_001316#(-t:20_C3819328198146)	no	no	2	1.8638e-42	185.67	52497000
AADEEAFEDNSEEYIRR	R	17	1	2042.88	NM_001316#(-t:20_C3819328198146);sp|P55060-3|XPO2_HUMAN;NM_001316#(f-T:20_C5969978294347);sp|P55060|XPO2_HUMAN;NM_001316#(-t:20_C1738167973710);NM_001316#(f-T:20_C8549154813296);tr|F8W904|F8W904_HUMAN;NM_001316#(f-:20_C5742475750137);NM_001316#(-t:20_C757719191970);NM_001316#(f-T:20_C6775741172695);NM_001316#(f-:20_C1586029435450);tr|B4DUC5|B4DUC5_HUMAN;NM_001316#(-t:20_C3322343151791);NM_001316#…	NM_001316#(-t:20_C3819328198146)	no	no	2,3	4.3369e-74	261.74	125040000
AADEIEKEKELLIHER	R	16	2	1922.01	sp|Q96BN8|F105B_HUMAN	sp|Q96BN8|F105B_HUMAN	yes	yes	4,5	8.6004e-15	131.56	9183000
AADELMCIDGIPVK	R	14	0	1530.74	sp|Q5TCQ9-3|MAGI3_HUMAN;sp|Q5TCQ9-4|MAGI3_HUMAN;sp|Q5TCQ9-2|MAGI3_HUMAN;sp|Q5TCQ9|MAGI3_HUMAN	sp|Q5TCQ9-3|MAGI3_HUMAN	yes	no	2	0.017351	33.008	221620
AADELMCIDGIPVKGK	R	16	1	1715.86	sp|Q5TCQ9-3|MAGI3_HUMAN;sp|Q5TCQ9-4|MAGI3_HUMAN;sp|Q5TCQ9-2|MAGI3_HUMAN;sp|Q5TCQ9|MAGI3_HUMAN	sp|Q5TCQ9-3|MAGI3_HUMAN	yes	no	3	2.1648e-05	80.632	1032800
AADEPAYLTVGTDVSAK	K	17	0	1706.84	sp|P29374-3|ARI4A_HUMAN;sp|P29374-2|ARI4A_HUMAN;sp|P29374|ARI4A_HUMAN;tr|F8WAR5|F8WAR5_HUMAN;tr|C9JIF4|C9JIF4_HUMAN	sp|P29374-3|ARI4A_HUMAN	yes	no	2	6.0068e-09	85.563	4086700
AADEVAEGK	K	9	0	888.419	sp|P07954-2|FUMH_HUMAN;NM_000143#(f-:1_F2778340654721);sp|P07954|FUMH_HUMAN;NM_000143#(f-:1_F9762790352606);NM_000143#(-s-:1_F2647880460415);NM_000143#(-s-:1_F7416844082699);NM_000143#(-s-:1_F3072825760331);NM_000143#(-s-s-:1_F5599200109339)	sp|P07954-2|FUMH_HUMAN	yes	no	2	0.05502	54.419	114250
AADEVLAEAK	R	10	0	1015.52	sp|Q6P1J9|CDC73_HUMAN;NM_024529#(-s-:1_C6789045663928)	sp|Q6P1J9|CDC73_HUMAN	yes	no	2	0.00013686	104.82	42386000
AADFEDLLSGQGFNAHK	K	17	0	1818.85	sp|O75061-4|AUXI_HUMAN;NM_014787#(-s-:1_D4305578401317);sp|O75061|AUXI_HUMAN;sp|O75061-2|AUXI_HUMAN;NM_014787#(-t:1_D9271866346891)	sp|O75061-4|AUXI_HUMAN	yes	no	3	4.9e-38	151.8	42362000
AADFIDQALAQK	R	12	0	1289.66	sp|P51452|DUS3_HUMAN;tr|Q8IYJ9|Q8IYJ9_HUMAN;tr|K7ES89|K7ES89_HUMAN;tr|K7ELG5|K7ELG5_HUMAN	sp|P51452|DUS3_HUMAN	yes	no	2,3	2.6201e-10	133.49	1144800000
AADFLSEPEGGPEMAK	R	16	0	1647.74	sp|Q63HN8|RN213_HUMAN;sp|Q63HN8-4|RN213_HUMAN;tr|H3BLU6|H3BLU6_HUMAN;NM_020914#(f-T:17_R1117331555028)	sp|Q63HN8|RN213_HUMAN	yes	no	2	2.7711e-19	119.54	99739000
AADFQLHTHVNDGTEFGGSIYQK	K	23	0	2534.18	sp|Q9Y277-2|VDAC3_HUMAN;tr|F5H740|F5H740_HUMAN;NM_005662#(-s-:8_V1705950341528)	sp|Q9Y277-2|VDAC3_HUMAN	no	no	2,3,4,5	3.3509e-222	333.81	3689900000
AADGGERPLAASPPGTVK	R	18	1	1692.88	tr|B7ZM82|B7ZM82_HUMAN;tr|M0QXA7|M0QXA7_HUMAN;NM_021241#(-s-s-s-:19_W9759511760665);NM_021241#(-s-:19_W1221319349315);sp|O95785-2|WIZ_HUMAN	tr|B7ZM82|B7ZM82_HUMAN	no	no	3	2.1992e-06	87.228	5545200
AADGNYYNAR	R	10	0	1113.48	sp|Q7Z3D6|CN159_HUMAN;sp|Q7Z3D6-2|CN159_HUMAN;NM_024952#(r:14_C5246469652628);NM_001102368#(r:14_C5246469652628);NM_024952#(-s-:14_C1764825879914);NM_001102368#(-s-:14_C1764825879914);sp|Q7Z3D6-3|CN159_HUMAN;NM_001102369#(-s-:14_C1764825879914);NM_024952#(-s-:14_C9766298692710);NM_001102368#(-s-:14_C9766298692710);sp|Q7Z3D6-5|CN159_HUMAN;tr|H0YB09|H0YB09_HUMAN;NM_001102369#(r:14_C5246469652628);s…	sp|Q7Z3D6|CN159_HUMAN	yes	no	2	0.0035801	61.78	5885400
AADGSAVSTVTK	R	12	0	1105.56	NM_134269#(-t:22_S3889503897475);sp|P53814-5|SMTN_HUMAN;NM_134269#(-s-:22_S6591233271092);NM_006932#(-t:22_S3889503897475);NM_134270#(-t:22_S3889503897475);NM_134269#(-t:22_S1836612322467);sp|P53814|SMTN_HUMAN;sp|P53814-6|SMTN_HUMAN;NM_006932#(-s-:22_S6591233271092);NM_134270#(-s-:22_S6591233271092);NM_006932#(-t:22_S1836612322467);NM_134270#(-t:22_S1836612322467);NM_134269#(-t:22_S3013629248706)…	NM_134269#(-t:22_S3889503897475)	yes	no	2	0.00026045	71.558	39293000
AADHLEALAAIEDFFLEHEALGISMAK	R	27	0	2911.44	sp|Q13144|EI2BE_HUMAN;tr|E9PC74|E9PC74_HUMAN;NM_003907#(r:3_E2385515095549);NM_003907#(-s-:3_E298125222585);NM_003907#(r:3_E5285642483485);NM_003907#(r:3_E709543001948)	sp|Q13144|EI2BE_HUMAN	yes	no	4	0.0082999	40.744	6148700
AADHLKPFLDDSTLR	K	15	1	1697.87	sp|O43395|PRPF3_HUMAN;NM_004698#(f-:1_P8119842949430);tr|E7EVD1|E7EVD1_HUMAN;NM_004698#(r:1_P7813508722136);NM_004698#(r:1_P9692482347832)	sp|O43395|PRPF3_HUMAN	yes	no	2,3,4	2.9908e-13	132.84	672920000
AADIAEALYSVPR	R	13	0	1374.71	sp|Q9HAK2|COE2_HUMAN;tr|B7Z934|B7Z934_HUMAN;tr|F5H645|F5H645_HUMAN;NM_001005463#(f-t:10_E4890457168699);sp|Q9H4W6-2|COE3_HUMAN;sp|Q9H4W6|COE3_HUMAN;NM_001005463#(f-:10_E61774271243)	NM_001005463#(f-t:10_E4890457168699)	no	no	2	0.0013462	53.592	30072000
AADIDLYHCPNCEVLHGPSIMK	K	22	0	2539.17	sp|Q9UPP1-2|PHF8_HUMAN;sp|Q9UPP1|PHF8_HUMAN;sp|Q9UPP1-4|PHF8_HUMAN;sp|Q9UPP1-3|PHF8_HUMAN;tr|B0QZZ4|B0QZZ4_HUMAN;tr|Q5JPR8|Q5JPR8_HUMAN;tr|B0QZZ2|B0QZZ2_HUMAN;tr|B0QZZ3|B0QZZ3_HUMAN;tr|B0QZE1|B0QZE1_HUMAN	sp|Q9UPP1-2|PHF8_HUMAN	yes	no	4	8.115e-23	97.69	89470000
AADIDQEVK	K	9	0	987.487	NM_018448#(-t:12_C2523396157092);sp|Q86VP6|CAND1_HUMAN;NM_018448#(f-:12_C8319591184912);NM_018448#(f-T:12_C3362732543970);NM_018448#(f-:12_C6503560753947);NM_018448#(f-T:12_C1453815144964);NM_018448#(-t:12_C5626941285594);NM_018448#(r:12_C9388579233762)	NM_018448#(-t:12_C2523396157092)	yes	no	2	1.4734e-05	134.26	558620000
AADIDQEVKER	K	11	1	1272.63	NM_018448#(-t:12_C2523396157092);sp|Q86VP6|CAND1_HUMAN;NM_018448#(f-:12_C8319591184912);NM_018448#(f-T:12_C3362732543970);NM_018448#(f-:12_C6503560753947);NM_018448#(f-T:12_C1453815144964);NM_018448#(-t:12_C5626941285594);NM_018448#(r:12_C9388579233762)	NM_018448#(-t:12_C2523396157092)	yes	no	3	1.0172e-06	134.13	6067300
AADIIDGLR	K	9	0	942.513	sp|Q96ST3|SIN3A_HUMAN	sp|Q96ST3|SIN3A_HUMAN	yes	yes	2	0.0015078	86.136	127540000
AADISESSGADCK	M	13	0	1309.55	sp|O43583|DENR_HUMAN;NM_003677#(-s-:12_D3229742593814);tr|F8VVL1|F8VVL1_HUMAN;NM_003677#(-t:12_D4700458243521);NM_003677#(-s-s-:12_D7435000446927);NM_003677#(-s-:12_D741209078358);NM_003677#(-s-:12_D8149788259899);NM_003677#(-s-s-s-:12_D3968683030247);NM_003677#(-s-:12_D9782123565672);NM_003677#(-s-s-:12_D9894632918005)	sp|O43583|DENR_HUMAN	no	no	2	5.4065e-07	107.65	11010000
AADISESSGADCKGDPR	M	17	1	1734.75	sp|O43583|DENR_HUMAN;NM_003677#(-s-:12_D3229742593814);tr|F8VVL1|F8VVL1_HUMAN;NM_003677#(-t:12_D4700458243521);NM_003677#(-s-s-:12_D7435000446927);NM_003677#(-s-:12_D741209078358);NM_003677#(-s-:12_D8149788259899);NM_003677#(-s-s-s-:12_D3968683030247);NM_003677#(-s-:12_D9782123565672);NM_003677#(-s-s-:12_D9894632918005)	sp|O43583|DENR_HUMAN	no	no	2,3	4.6823e-18	141.86	44344000
AADISLDNLVEGK	K	13	0	1343.69	sp|Q12888|TP53B_HUMAN;tr|F8VY86|F8VY86_HUMAN;sp|Q12888-2|TP53B_HUMAN;NM_005657#(r:15_T3833088977747);tr|A6NNK5|A6NNK5_HUMAN;NM_005657#(r:15_T6580223446418);tr|H7BZY0|H7BZY0_HUMAN	sp|Q12888|TP53B_HUMAN	yes	no	2,3	2.4542e-12	132.79	177700000
AADKLAPAQYIR	R	12	1	1315.72	sp|Q13573|SNW1_HUMAN;NM_012245#(-t:14_S4979344504103);NM_012245#(-t:14_S615741066458);tr|G3V3A4|G3V3A4_HUMAN;tr|G3V4X8|G3V4X8_HUMAN	sp|Q13573|SNW1_HUMAN	yes	no	3	1.7801e-06	124.38	17359000
AADKPADQGAEKHEGTGQSSGITDQEK	M	27	2	2754.27	sp|Q9H9A5|CNOTA_HUMAN;sp|Q9H9A5-3|CNOTA_HUMAN;NM_015442#(-s-:3_C3440853404529);sp|Q9H9A5-2|CNOTA_HUMAN;sp|Q9H9A5-4|CNOTA_HUMAN;NM_015442#(-t:3_C7711657304808);tr|E9PCN5|E9PCN5_HUMAN	sp|Q9H9A5|CNOTA_HUMAN	yes	no	4	2.4601e-66	190.28	5694500
AADLFESEGAK	K	11	0	1136.54	sp|Q9H0R6|GATA_HUMAN;NM_018292#(-t:6_Q2012524293896);NM_018292#(-s-:6_Q5524630287480)	sp|Q9H0R6|GATA_HUMAN	yes	no	2	7.3661e-06	114.86	184450000
AADLKYIEACAR	R	12	1	1379.69	sp|O60701|UGDH_HUMAN;sp|O60701-3|UGDH_HUMAN;tr|E7ER83|E7ER83_HUMAN;tr|E7EV97|E7EV97_HUMAN;tr|E7ETF4|E7ETF4_HUMAN	sp|O60701|UGDH_HUMAN	no	no	3	5.8185e-06	106.32	5666000
AADLLAVHAVK	R	11	0	1106.64	sp|Q8NFC6|BD1L1_HUMAN;NM_148894#(-s-:4_F9331762767227)	sp|Q8NFC6|BD1L1_HUMAN	yes	no	3	4.3231e-05	84.507	10824000
AADLLQFPAVK	R	11	0	1171.66	sp|Q9UJP4-2|KLH21_HUMAN;sp|Q9UJP4|KLH21_HUMAN	sp|Q9UJP4-2|KLH21_HUMAN	yes	no	2	0.093984	33.1	5347900
AADLLVNPLDPR	R	12	0	1292.71	NM_182692#(-s-:7_S6225870852978);sp|P78362|SRPK2_HUMAN;sp|P78362-2|SRPK2_HUMAN;NM_182692#(-s-S-:7_S71713303116);NM_182691#(-s-:7_S7356959219311);NM_182692#(-s-:7_S7356959219311);NM_182692#(-s-:7_S7497861740776);NM_182691#(-s-:7_S4615518723310);NM_182692#(-s-:7_S4615518723310)	NM_182692#(-s-:7_S6225870852978)	no	no	2,3	2.5466e-05	90.793	445270000
AADLLYAMCDR	R	11	0	1297.58	sp|O95782-2|AP2A1_HUMAN;NM_130787#(f-T:19_A7779616395445);sp|O95782|AP2A1_HUMAN;NM_014203#(f-T:19_A7779616395445);NM_014203#(-s-s-:19_A9569240975922);NM_014203#(-s-:19_A2975066975538);NM_130787#(-t:19_A1779763698314);NM_014203#(-t:19_A1779763698314);NM_130787#(-s-:19_A4834908559705);NM_130787#(f-:19_A4248413353708);NM_014203#(-s-:19_A4834908559705);NM_014203#(f-:19_A4248413353708);NM_014203#(-s-s…	sp|O95782-2|AP2A1_HUMAN	yes	no	2,3	1.1373e-06	121.02	543270000
AADLNGDLTATR	K	12	0	1216.6	sp|Q15293|RCN1_HUMAN;tr|B7Z1M1|B7Z1M1_HUMAN;tr|E9PP27|E9PP27_HUMAN	sp|Q15293|RCN1_HUMAN	yes	no	2	3.9426e-14	145.14	826090000
AADLNLEWISLPR	M	13	0	1496.8	NM_019012#(-s-:12_P6495155407332);sp|Q9HAU0|PKHA5_HUMAN;sp|Q9HAU0-2|PKHA5_HUMAN;sp|Q9HAU0-4|PKHA5_HUMAN;sp|Q9HAU0-6|PKHA5_HUMAN;sp|Q9HAU0-5|PKHA5_HUMAN;sp|Q9HAU0-3|PKHA5_HUMAN;tr|Q86ST7|Q86ST7_HUMAN	NM_019012#(-s-:12_P6495155407332)	yes	no	2,3	4.7915e-12	140.82	37187000
AADLQLEMTQKPHK	K	14	1	1608.83	NM_001190#(-s-s-s-:19_B8976169826710);NM_001190#(-s-:19_B9369958234023);NM_001190#(-s-s-:19_B9847598354843);NM_001190#(-s-s-:19_B6010150902763);NM_001190#(-s-:19_B7506033847221);NM_001190#(-s-s-s-:19_B4037098572432);NM_001190#(-s-s-:19_B6857619200667);NM_001190#(-s-s-s-s-:19_B4892700387875);sp|O15382|BCAT2_HUMAN;tr|M0QXF9|M0QXF9_HUMAN;NM_001190#(-s-:19_B8408814943209);tr|M0QZ10|M0QZ10_HUMAN;NM_00…	sp|O15382|BCAT2_HUMAN	no	no	3,4	1.1589e-06	94.09	523010000
AADLVEALYGMPHNNQEIILK	R	21	0	2338.2	NM_001005463#(f-t:10_E4890457168699);sp|Q9H4W6-2|COE3_HUMAN;sp|Q9H4W6|COE3_HUMAN;NM_001005463#(f-:10_E61774271243)	NM_001005463#(f-t:10_E4890457168699)	no	no	3,4	2.9962e-33	118.19	25707000
AADMDLEWR	K	9	0	1105.49	tr|F8VSZ4|F8VSZ4_HUMAN;sp|Q9UIW2|PLXA1_HUMAN	tr|F8VSZ4|F8VSZ4_HUMAN	no	no	2	2.3282e-05	161.79	35841000
AADMGNPVGQSGLGMAYLYGR	K	21	0	2126.99	sp|Q9UBV2|SE1L1_HUMAN	sp|Q9UBV2|SE1L1_HUMAN	yes	yes	2,3	1.7073e-68	185.85	253660000
AADMLSGPR	K	9	0	916.444	NM_003748#(-t:1_A7720716574074);sp|P30038|AL4A1_HUMAN;sp|P30038-2|AL4A1_HUMAN;NM_003748#(f-t:1_A2194338837990);NM_003748#(f-:1_A6360866452277);NM_003748#(-s-:1_A5477813945004);tr|D2D4A3|D2D4A3_HUMAN;tr|Q5TF55|Q5TF55_HUMAN	NM_003748#(-t:1_A7720716574074)	yes	no	2	2.3809e-05	138.4	220650000
AADPAPEVR	R	9	0	924.466	sp|Q8IVT2|CS021_HUMAN	sp|Q8IVT2|CS021_HUMAN	yes	yes	2	0.0020093	81.263	22167000
AADPGPGAELDPAAPPPAR	R	19	0	1768.87	tr|K7EL81|K7EL81_HUMAN;sp|Q9BZL4-3|PP12C_HUMAN;sp|Q9BZL4-4|PP12C_HUMAN;sp|Q9BZL4|PP12C_HUMAN;tr|B5MEC7|B5MEC7_HUMAN;sp|Q9BZL4-2|PP12C_HUMAN;NM_017607#(r:19_P5623772472771);NM_017607#(-s-:19_P8215012801973);NM_017607#(-s-:19_P8680318277468);NM_017607#(r:19_P2977180046618);NM_017607#(f-:19_P569891372747);NM_017607#(-s-:19_P353128880466);NM_017607#(r:19_P7849497911121);NM_017607#(-s-:19_P12816404027…	tr|K7EL81|K7EL81_HUMAN	yes	no	2	3.2057e-06	68.952	818880
AADPPAENSSAPEAEQGGAE	K	20	0	1896.8	sp|P67809|YBOX1_HUMAN;NM_004559#(-t:1_Y1126415594120);NM_004559#(f-T:1_Y5433421627142);NM_004559#(-t:1_Y7274284998859);NM_004559#(r:1_Y8757339680519);NM_004559#(f-:1_Y1160309101593);NM_004559#(f-:1_Y709419389101);tr|H0Y449|H0Y449_HUMAN;NM_004559#(-s-:1_Y7532718623519);NM_004559#(-s-:1_Y1399695587724);NM_004559#(-s-s-:1_Y65261210000);NM_004559#(-s-:1_Y2607440434511);NM_004559#(-s-s-s-:1_Y380540765…	sp|P67809|YBOX1_HUMAN	yes	no	2,3	2.2181e-25	121.26	18549000
AADPSSLQSHIPVLDK	R	16	0	1676.87	tr|E7ERU2|E7ERU2_HUMAN;tr|E9PEB9|E9PEB9_HUMAN;tr|J3QTQ0|J3QTQ0_HUMAN;tr|E9PHM6|E9PHM6_HUMAN	tr|E7ERU2|E7ERU2_HUMAN	no	no	3	0.00022287	49.343	26978000
AADPVPSFDESSQDTSEK	K	18	0	1908.82	sp|Q96QE3|ATAD5_HUMAN;sp|Q96QE3-2|ATAD5_HUMAN	sp|Q96QE3|ATAD5_HUMAN	yes	no	2	0.0046517	34.649	1618400
AADQFDIYSSQQSK	R	14	0	1586.72	sp|Q7Z6I8|CE024_HUMAN;sp|Q7Z6I8-2|CE024_HUMAN;tr|H0YAE0|H0YAE0_HUMAN	sp|Q7Z6I8|CE024_HUMAN	yes	no	2,3	2.8616e-23	185.95	37649000
AADQTTAEQGMR	R	12	0	1277.57	NM_002077#(r:9_G4332946304738);NM_002077#(-t:9_G1323050389531);sp|Q92805|GOGA1_HUMAN	NM_002077#(r:9_G4332946304738)	yes	no	2	2.1495e-07	112.64	0
AADRLEEEIEEHAFDDNK	K	18	1	2129.95	NM_017905#(-s-:13_T9726957988014);sp|Q6UWJ1-3|TMCO3_HUMAN;sp|Q6UWJ1-2|TMCO3_HUMAN;NM_017905#(-s-s-:13_T9837154553599);NM_017905#(-s-:13_T5382953576048);NM_017905#(f-:13_T2758482889022);sp|Q6UWJ1|TMCO3_HUMAN;NM_017905#(-t:13_T680330955354);NM_017905#(f-t:13_T7291459744536)	NM_017905#(-s-:13_T9726957988014)	yes	no	4	4.6283e-30	140.28	4393400
AADRLEQELLR	K	11	1	1312.71	sp|Q6PK04|CC137_HUMAN;tr|I3L0U5|I3L0U5_HUMAN;NM_199287#(-t:17_C1368209018152)	sp|Q6PK04|CC137_HUMAN	yes	no	2,3	1.7558e-09	147.24	36210000
AADRLEQELLRDTVK	K	15	2	1755.95	sp|Q6PK04|CC137_HUMAN;tr|I3L0U5|I3L0U5_HUMAN;NM_199287#(-t:17_C1368209018152)	sp|Q6PK04|CC137_HUMAN	yes	no	4	0.00055483	73.593	683270
AADRLPNLSSPSAEGPPGPPSGPAPR	K	26	1	2494.26	NM_005488#(-s-s-:22_T8176690471560);sp|O60784|TOM1_HUMAN;NM_005488#(-t:22_T9545145131984);NM_005488#(-t:22_T4936680233559);NM_005488#(-s-s-s-s-:22_T2249652963218);NM_005488#(-s-s-s-:22_T4900485756599);NM_005488#(-s-s-:22_T5096921183128);NM_005488#(-s-:22_T9608823335195);tr|E7EPD0|E7EPD0_HUMAN;NM_005488#(f-:22_T656504141094);NM_005488#(-s-s-s-s-s-s-:22_T2275605563789);NM_005488#(-s-s-s-s-s-:22_T83…	NM_005488#(-s-s-:22_T8176690471560)	yes	no	3	5.1028e-22	118.9	26469000
AADSICDGDLVDSQIR	R	16	0	1733.79	NM_002913#(-s-:4_R3702454106941);NM_002913#(-t:4_R8498984949233);sp|P35251-2|RFC1_HUMAN;sp|P35251|RFC1_HUMAN;NM_002913#(-s-:4_R2264812145293);NM_002913#(-t:4_R6952248213025);NM_002913#(-s-:4_R7779804526243);NM_002913#(-s-s-:4_R5622496401854);NM_002913#(-s-:4_R3640800492160);NM_002913#(-s-s-:4_R6028398531588);NM_002913#(-t:4_R4226897567777);NM_002913#(-s-s-:4_R7377537429753);NM_002913#(-s-s-s-:4_R…	NM_002913#(-t:4_R8498984949233)	no	no	2	9.5577e-24	134.14	58794000
AADSLQQNLQR	K	11	0	1242.63	NM_001012991#(-s-:16_C9992108306422);sp|Q1ED39|CP088_HUMAN	NM_001012991#(-s-:16_C9992108306422)	no	no	2	5.3655e-11	176.95	140330000
AADSQNSGEGNTGAAESSFSQEVSR	R	25	0	2485.06	NM_003292#(f-T:1_T8309476700424);NM_003292#(-s-:1_T1027303053845);NM_003292#(-t:1_T2688717973590);sp|P12270|TPR_HUMAN;NM_003292#(-s-:1_T5885405663705);NM_003292#(-s-:1_T2910886420506);NM_003292#(-s-:1_T6375765248609);NM_003292#(-s-s-:1_T388465789248);NM_003292#(-s-s-:1_T952519752759);NM_003292#(-s-s-s-:1_T8797670278836)	NM_003292#(f-T:1_T8309476700424)	yes	no	2	3.5339e-109	210.64	2521900
AADTIGYPVMIR	K	12	0	1305.68	NM_001875#(f-:2_C3384471644445);NM_001875#(-t:2_C997736983683);NM_001122633#(f-:2_C3384471644445);sp|P31327|CPSM_HUMAN;NM_001122633#(-t:2_C997736983683);tr|J3KQL0|J3KQL0_HUMAN;NM_001122633#(-s-:2_C6201746595906);NM_001875#(r:2_C6310185629053);NM_001122633#(r:2_C6310185629053);NM_001875#(f-:2_C5236609717729);NM_001122633#(f-:2_C5236609717729);NM_001875#(f-T:2_C6709216706468);NM_001875#(-t:2_C80066…	NM_001875#(f-:2_C3384471644445)	yes	no	2	1.3798e-05	98.898	360830000
AADTQVSETLKR	M	12	1	1317.69	sp|Q92616|GCN1L_HUMAN;NM_006836#(f-T:12_G5669865150165)	sp|Q92616|GCN1L_HUMAN	yes	no	2	6.0107e-17	216.91	300070000
AADVENVPPVISTPHHYLISIYR	K	23	0	2590.35	sp|Q9Y2T2|AP3M1_HUMAN;NM_012095#(f-T:10_A1134123930913);NM_012095#(-t:10_A9987207641210);NM_012095#(f-:10_A4942954717602)	sp|Q9Y2T2|AP3M1_HUMAN	yes	no	3,4	6.5849e-42	127.92	350900000
AADVEQLKPEEIK	K	13	1	1468.78	NM_014611#(-s-:6_M1440352904999);sp|Q9NU22|MDN1_HUMAN;NM_014611#(-s-s-:6_M1666679965263);NM_014611#(-s-s-:6_M3454275648974);NM_014611#(-s-s-s-:6_M6787561955343);NM_014611#(-s-s-:6_M4519640696111);NM_014611#(-s-s-:6_M1736166639609);NM_014611#(-s-s-s-s-s-:6_M5492006478934);NM_014611#(-s-s-s-s-:6_M1462960251040);NM_014611#(-s-s-s-s-:6_M8777040048613);NM_014611#(-s-:6_M6759769926647);NM_014611#(-s-:6…	NM_014611#(-s-:6_M1440352904999)	no	no	3	8.6243e-08	119.39	68072000
AADVSVTHRPPLSPK	M	15	1	1573.86	sp|Q8IY67-2|RAVR1_HUMAN;sp|Q8IY67|RAVR1_HUMAN;sp|Q8IY67-3|RAVR1_HUMAN	sp|Q8IY67-2|RAVR1_HUMAN	yes	no	3	0.00039325	78.69	97617000
AAEAAAAPAESAAPAAGEEPSKEEGEPK	K	28	1	2635.22	sp|P80723|BASP1_HUMAN;NM_006317#(r:5_B2120425959883)	sp|P80723|BASP1_HUMAN	yes	no	2,3,4	1.2905e-53	163.46	1682500000
AAEAAASAYYNPGNPHNVYMPTSQPPPPPYYPPEDK	K	36	0	3900.77	tr|A6NG10|A6NG10_HUMAN;NM_012478#(f-:17_W5574279037926);NM_012478#(f-:17_W1145532149490);NM_012478#(f-:17_W7854085349252);tr|K7EIK1|K7EIK1_HUMAN;NM_012478#(f-:17_W7685870281717);tr|K7EMC9|K7EMC9_HUMAN;NM_012478#(f-:17_W3358662268121);sp|Q969T9|WBP2_HUMAN;NM_012478#(-t:17_W6511167663878);NM_012478#(-t:17_W880428709048);tr|B4DFG2|B4DFG2_HUMAN;NM_012478#(-t:17_W2636541180763);NM_012478#(-t:17_W97684…	tr|A6NG10|A6NG10_HUMAN	no	no	3,4	4.6076e-44	101.21	191470000
AAEAADLGLGAAVPVELR	M	18	0	1721.93	sp|Q9Y5Q8|TF3C5_HUMAN;sp|Q9Y5Q8-3|TF3C5_HUMAN;sp|Q9Y5Q8-2|TF3C5_HUMAN;tr|H7BY84|H7BY84_HUMAN;tr|Q5T7U1|Q5T7U1_HUMAN;NM_001122823#(r:9_G4608666901375);NM_012087#(f-:9_G4364455402958)	sp|Q9Y5Q8|TF3C5_HUMAN	yes	no	2,3	4.6056e-26	133.9	371170000
AAEAAEAAAAAAAAGSGK	R	18	0	1457.71	tr|E9PJD7|E9PJD7_HUMAN	tr|E9PJD7|E9PJD7_HUMAN	yes	yes	2	0.00059455	60.764	3048000
AAEAAINILK	R	10	0	1012.59	sp|O75569|PRKRA_HUMAN;sp|O75569-3|PRKRA_HUMAN;sp|O75569-2|PRKRA_HUMAN;tr|G5E9Q4|G5E9Q4_HUMAN;tr|F8WEG8|F8WEG8_HUMAN;tr|C9JMM3|C9JMM3_HUMAN	sp|O75569|PRKRA_HUMAN	yes	no	2	0.00039143	89.08	388300000
AAEAAPPTQEAQGETEPTEQAPDALEQAADTSR	K	33	0	3379.53	NM_199205#(-t:8_K5324873092948);NM_199205#(-s-s-:8_K6872774323728);NM_199205#(-s-s-s-:8_K9059340477113);NM_199205#(-s-s-s-:8_K9207909248350);NM_199205#(-s-s-s-s-:8_K2900739272161);NM_199205#(-s-s-s-s-s-:8_K6130027060012);NM_199205#(-s-:8_K8250231631129);NM_199205#(r:8_K9584614371810);NM_199205#(-s-s-:8_K2857109526334);NM_199205#(-s-s-s-s-s-:8_K6335344178663);NM_199205#(-s-s-s-s-s-s-:8_K8400096936…	sp|Q8N163|K1967_HUMAN	no	no	3	8.6865e-59	134.96	9708800
AAEAAPPTQEAQGETEPTEQAPDALEQAADTSRR	K	34	1	3535.63	NM_199205#(-t:8_K5324873092948);NM_199205#(-s-s-:8_K6872774323728);NM_199205#(-s-s-s-:8_K9059340477113);NM_199205#(-s-s-s-:8_K9207909248350);NM_199205#(-s-s-s-s-:8_K2900739272161);NM_199205#(-s-s-s-s-s-:8_K6130027060012);NM_199205#(-s-:8_K8250231631129);NM_199205#(r:8_K9584614371810);NM_199205#(-s-s-:8_K2857109526334);NM_199205#(-s-s-s-s-s-:8_K6335344178663);NM_199205#(-s-s-s-s-s-s-:8_K8400096936…	sp|Q8N163|K1967_HUMAN	no	no	4	1.0294e-16	89.391	4671600
AAEADGPLKR	M	10	1	1026.55	tr|J3QS48|J3QS48_HUMAN;tr|I3L295|I3L295_HUMAN;tr|J3KT75|J3KT75_HUMAN;tr|B4DT74|B4DT74_HUMAN;tr|J3QW43|J3QW43_HUMAN;tr|J3QRD5|J3QRD5_HUMAN;NM_004870#(-t:17_M4465204602833);sp|O75352|MPU1_HUMAN;NM_004870#(f-:17_M4573602884346);NM_004870#(f-:17_M2798250266788);NM_004870#(f-:17_M3304772712720);tr|I3L1D2|I3L1D2_HUMAN;tr|J3KSI4|J3KSI4_HUMAN;tr|I3L4E0|I3L4E0_HUMAN	tr|J3QS48|J3QS48_HUMAN	yes	no	2	6.1028e-08	157.99	1292300000
AAEAFSELSK	K	10	0	1051.52	sp|Q12929|EPS8_HUMAN;NM_004447#(f-T:12_E8302223152418);NM_004447#(-s-:12_E437181560657);NM_004447#(-s-:12_E5495903149261);NM_004447#(f-:12_E642825849795);NM_004447#(-t:12_E2517791355815);NM_004447#(-t:12_E5467727360625);NM_004447#(f-:12_E7957763623564);tr|B4DX66|B4DX66_HUMAN;NM_004447#(f-T:12_E7400099935042);NM_004447#(-s-:12_E49735095149)	sp|Q12929|EPS8_HUMAN	yes	no	2	0.0006257	79.659	1999300
AAEAGGAEEQYGFLTTPTK	K	19	0	1939.92	sp|P46821|MAP1B_HUMAN	sp|P46821|MAP1B_HUMAN	yes	yes	2,3	8.006e-55	185.55	586410000
AAEAHVDAHYYEQNEQPTGTCAACITGDNR	K	30	0	3348.42	sp|P55263|ADK_HUMAN;sp|P55263-2|ADK_HUMAN;NM_001123#(-t:10_A7630511288417);NM_001123#(f-:10_A4252719832994);NM_001123#(f-:10_A2367897179413);NM_001123#(f-T:10_A8520213177861);NM_001123#(-t:10_A5599499837003);sp|P55263-3|ADK_HUMAN;NM_001123#(f-T:10_A641688123318);NM_001123#(-t:10_A6747609834155);NM_001123#(f-:10_A5654630728385);NM_001123#(f-T:10_A2144802609810);tr|B7Z800|B7Z800_HUMAN;NM_001123#(-t…	sp|P55263|ADK_HUMAN	yes	no	3,4,5,6	2.8122e-152	203.19	373730000
AAEALAAEAVASR	M	13	0	1228.64	sp|A2RTX5|SYTC2_HUMAN;sp|A2RTX5-2|SYTC2_HUMAN;tr|B7ZLP8|B7ZLP8_HUMAN	sp|A2RTX5|SYTC2_HUMAN	yes	no	2	0.0012512	63.185	2215700
AAEALHGEADSSGVLAAVDATVNK	K	24	0	2295.13	sp|Q14554|PDIA5_HUMAN	sp|Q14554|PDIA5_HUMAN	yes	yes	3,4	9.1006e-68	157.28	198990000
AAEATNDYETLVK	K	13	0	1423.68	sp|Q2NKX8|ERC6L_HUMAN;tr|B5MDQ0|B5MDQ0_HUMAN	sp|Q2NKX8|ERC6L_HUMAN	yes	no	2	3.5411e-09	119.39	88585000
AAEATNDYETLVKR	K	14	1	1579.78	sp|Q2NKX8|ERC6L_HUMAN;tr|B5MDQ0|B5MDQ0_HUMAN	sp|Q2NKX8|ERC6L_HUMAN	yes	no	3	5.7636e-11	127.79	5254300
AAEAVAAAVGTGATTAAVMAAAGIAAIGPAK	K	31	0	2623.4	sp|P46821|MAP1B_HUMAN	sp|P46821|MAP1B_HUMAN	yes	yes	3,4	2.0493e-48	144.44	76053000
AAECNIVVTQPR	R	12	0	1356.68	sp|Q08211|DHX9_HUMAN;NM_001357#(-s-:1_D8664909047688);NM_001357#(-s-:1_D3394987094540);NM_001357#(f-T:1_D7035182508474);NM_001357#(-s-s-:1_D3710533341417);NM_001357#(r:1_D4868308529720);NM_001357#(-s-:1_D9398358861475);NM_001357#(-s-s-:1_D7669668670175);NM_001357#(-s-s-:1_D7470270530226);NM_001357#(-s-:1_D9579154987891);NM_001357#(-s-s-s-:1_D5255509926308);NM_001357#(-s-s-s-:1_D7157406681992);NM_…	sp|Q08211|DHX9_HUMAN	yes	no	2,3	6.955e-16	148.18	5573300000
AAEDAVYELQSK	R	12	0	1322.64	sp|Q92817|EVPL_HUMAN;tr|K7EKI0|K7EKI0_HUMAN;NM_001988#(r:17_E8771837025229)	sp|Q92817|EVPL_HUMAN	yes	no	2	0.0026985	49.632	53439000
AAEDDEDDDVDTK	R	13	0	1436.54	NM_002823#(r:2_P5782251046486);NM_001099285#(r:2_P5782251046486);tr|B8ZZQ6|B8ZZQ6_HUMAN;sp|P06454-2|PTMA_HUMAN;sp|P06454|PTMA_HUMAN;NM_002823#(f-:2_P53950367714);NM_001099285#(f-:2_P53950367714);NM_002823#(f-:2_P1374994738948);NM_001099285#(f-:2_P1374994738948);tr|B8ZZA1|B8ZZA1_HUMAN;tr|B8ZZW7|B8ZZW7_HUMAN;tr|H7C2N1|H7C2N1_HUMAN;NM_002823#(-s-:2_P862992032442);NM_001099285#(-s-:2_P862992032442)	NM_002823#(r:2_P5782251046486)	yes	no	2	7.806e-16	141.73	47538000
AAEDDEDDDVDTKK	R	14	1	1564.64	NM_002823#(r:2_P5782251046486);NM_001099285#(r:2_P5782251046486);tr|B8ZZQ6|B8ZZQ6_HUMAN;sp|P06454-2|PTMA_HUMAN;sp|P06454|PTMA_HUMAN;NM_002823#(f-:2_P53950367714);NM_001099285#(f-:2_P53950367714);NM_002823#(f-:2_P1374994738948);NM_001099285#(f-:2_P1374994738948);tr|B8ZZA1|B8ZZA1_HUMAN;tr|B8ZZW7|B8ZZW7_HUMAN;tr|H7C2N1|H7C2N1_HUMAN;NM_002823#(-s-:2_P862992032442);NM_001099285#(-s-:2_P862992032442)	NM_002823#(r:2_P5782251046486)	yes	no	2,3	3.9768e-24	195.87	826710000
AAEDDEDDDVDTKKQK	R	16	2	1820.79	NM_002823#(r:2_P5782251046486);NM_001099285#(r:2_P5782251046486);tr|B8ZZQ6|B8ZZQ6_HUMAN;sp|P06454-2|PTMA_HUMAN;sp|P06454|PTMA_HUMAN;NM_002823#(f-:2_P53950367714);NM_001099285#(f-:2_P53950367714);NM_002823#(f-:2_P1374994738948);NM_001099285#(f-:2_P1374994738948);tr|B8ZZA1|B8ZZA1_HUMAN;tr|B8ZZW7|B8ZZW7_HUMAN;tr|H7C2N1|H7C2N1_HUMAN;NM_002823#(-s-:2_P862992032442);NM_001099285#(-s-:2_P862992032442)	NM_002823#(r:2_P5782251046486)	yes	no	3,4	2.5085e-05	91.355	2211500
AAEDELNIEAK	R	11	0	1201.58	sp|Q9UQ90|SPG7_HUMAN;NM_003119#(-t:16_S6901297398171);sp|Q9UQ90-2|SPG7_HUMAN;NM_199367#(f-:16_S6533686011827)	sp|Q9UQ90|SPG7_HUMAN	yes	no	2,3	1.3423e-06	122.7	65265000
AAEDELQLPR	M	10	0	1140.58	sp|P78318|IGBP1_HUMAN;NM_001551#(-s-s-:X_I1697678677072);NM_001551#(-s-:X_I2792148586873);NM_001551#(-s-:X_I9997302201082);NM_001551#(-s-:X_I9507254768255);NM_001551#(f-T:X_I4772653439878);NM_001551#(-t:X_I3605612824328);NM_001551#(-s-s-s-:X_I7238503077749);NM_001551#(-s-:X_I5998944776137)	sp|P78318|IGBP1_HUMAN	yes	no	2	1.2262e-07	161.17	63963000
AAEDLFVNIR	K	10	0	1146.6	sp|Q9Y2A7|NCKP1_HUMAN;sp|Q9Y2A7-2|NCKP1_HUMAN;NM_013436#(-t:2_N8097651651555);NM_205842#(-t:2_N8097651651555);NM_013436#(-s-s-:2_N8709850807552);NM_205842#(-s-s-:2_N8709850807552);NM_013436#(-s-:2_N9364769312658);NM_205842#(-s-:2_N9364769312658);NM_013436#(-s-s-:2_N9317143483765);NM_205842#(-s-s-:2_N9317143483765);NM_013436#(-s-s-s-s-:2_N2072740183073);NM_205842#(-s-s-s-s-:2_N2072740183073);NM_20…	sp|Q9Y2A7|NCKP1_HUMAN	yes	no	2	2.4492e-07	132.01	683310000
AAEDSPYWVSPAYSK	K	15	0	1669.76	NM_018034#(-t:5_W7951106282445);sp|Q9NW82|WDR70_HUMAN	NM_018034#(-t:5_W7951106282445)	yes	no	2,3	1.4257e-11	97.797	208810000
AAEDSYAK	K	8	0	853.382	sp|Q9BZD4|NUF2_HUMAN;tr|E9PQC4|E9PQC4_HUMAN;NM_145697#(-t:1_N1720027773522)	sp|Q9BZD4|NUF2_HUMAN	yes	no	2	0.01978	58.981	900650
AAEDYGVIK	K	9	0	964.487	sp|Q01995|TAGL_HUMAN;NM_003186#(f-:11_T5290799369156);NM_003186#(-t:11_T9587782389301);NM_003186#(-t:11_T486959522179);NM_003186#(-t:11_T3220118303028);tr|H0YCU9|H0YCU9_HUMAN;NM_001001522#(f-f-:11_T4917507971056)	sp|Q01995|TAGL_HUMAN	yes	no	2	0.003085	74.92	3298600000
AAEEAASTLASSIHPEQCIK	R	20	0	2112.02	tr|B7ZLX3|B7ZLX3_HUMAN;tr|E7EUA5|E7EUA5_HUMAN;sp|Q7Z460-2|CLAP1_HUMAN;tr|F5GWS0|F5GWS0_HUMAN;tr|F8WA11|F8WA11_HUMAN;sp|Q7Z460-3|CLAP1_HUMAN;sp|Q7Z460|CLAP1_HUMAN	tr|B7ZLX3|B7ZLX3_HUMAN	no	no	2,3	1.9268e-68	182.76	112670000
AAEEAFVNDIDESSPGTEWER	R	21	0	2351.02	NM_001833#(-t:9_C1020535911343);sp|P09496-2|CLCA_HUMAN;NM_001076677#(-t:9_C1020535911343);NM_007096#(-t:9_C1020535911343);sp|P09496-4|CLCA_HUMAN;sp|P09496-3|CLCA_HUMAN;sp|P09496|CLCA_HUMAN;NM_001833#(-s-:9_C8009862215980);NM_001076677#(-s-:9_C8009862215980);NM_007096#(-s-:9_C8009862215980);tr|F5H6N3|F5H6N3_HUMAN;NM_001833#(-s-s-:9_C1547737900331);NM_001076677#(-s-s-:9_C1547737900331);tr|C9J8P9|C9…	NM_001833#(-t:9_C1020535911343)	yes	no	2,3	1.5431e-79	217.33	71549000
AAEECGYSVQVISMEPESCSPK	R	22	0	2457.05	sp|Q8NEC7|GSTCD_HUMAN;NM_001031720#(f-T:4_G4446835648144);NM_001031720#(f-:4_G3542063050782);sp|Q8NEC7-3|GSTCD_HUMAN;NM_024751#(f-T:4_G4446835648144)	sp|Q8NEC7|GSTCD_HUMAN	yes	no	3	6.0092e-32	117.23	889930
AAEEEDEADPK	R	11	0	1202.49	sp|P20962|PTMS_HUMAN	sp|P20962|PTMS_HUMAN	yes	yes	2	6.5579e-05	98.156	40372000
AAEEEDEADPKR	R	12	1	1358.6	sp|P20962|PTMS_HUMAN	sp|P20962|PTMS_HUMAN	yes	yes	2,3	7.1268e-17	186.81	552640000
AAEEEDEADPKRQK	R	14	2	1614.75	sp|P20962|PTMS_HUMAN	sp|P20962|PTMS_HUMAN	yes	yes	4	0.067847	46.069	52461
AAEEFVNVYYTTMDK	R	15	0	1779.8	sp|Q9UKK6|NXT1_HUMAN	sp|Q9UKK6|NXT1_HUMAN	yes	yes	2	8.6413e-05	58.079	31240000
AAEEFVNVYYTTMDKR	R	16	1	1935.9	sp|Q9UKK6|NXT1_HUMAN	sp|Q9UKK6|NXT1_HUMAN	yes	yes	3	8.2353e-38	159.34	31804000
AAEEIGIK	K	8	0	829.455	tr|G3V2B8|G3V2B8_HUMAN;NM_005956#(-t:14_M5703796308105);NM_005956#(-t:14_M1015812245655);NM_005956#(-s-:14_M6479404898840);tr|F5H2F4|F5H2F4_HUMAN;NM_005956#(-s-:14_M6704739722235);NM_005956#(f-:14_M2640062547146);NM_005956#(-s-:14_M3883101536804);NM_005956#(-s-:14_M3598717029953);sp|P11586|C1TC_HUMAN	sp|P11586|C1TC_HUMAN	no	no	2	0.0043642	95.531	467030000
AAEELTWER	R	9	0	1103.52	NM_005885#(-s-s-s-s-s-s-:5_M9205926466450);NM_005885#(-s-s-s-s-:5_M8774912020117);NM_005885#(-s-s-s-s-s-:5_M3327778855545);NM_005885#(-s-s-s-:5_M1008150577216);NM_005885#(-s-s-s-s-:5_M7399311766287);NM_005885#(-s-s-s-:5_M9632937198529);NM_005885#(-s-s-:5_M9716949455719);NM_005885#(-s-s-s-:5_M5200507953571);NM_005885#(-s-s-:5_M2324485050685);NM_005885#(-s-s-:5_M424590363089);NM_005885#(-s-:5_M7119…	NM_005885#(-s-s-s-s-s-s-:5_M9205926466450)	no	no	2	0.00051359	111.61	406610000
AAEEPSKVEEK	K	11	1	1215.6	sp|P29966|MARCS_HUMAN	sp|P29966|MARCS_HUMAN	yes	yes	3	4.0068e-07	141.71	6933100
AAEEVEAKFK	K	10	1	1120.58	sp|Q9NX63|CHCH3_HUMAN;tr|C9JRZ6|C9JRZ6_HUMAN;NM_017812#(-s-:7_C1253458952636);NM_017812#(-t:7_C4947535479474);tr|F8WAR4|F8WAR4_HUMAN	sp|Q9NX63|CHCH3_HUMAN	yes	no	3	0.00017849	96.342	722600
AAEEVLQTVDHYK	M	13	0	1501.74	tr|A8MVZ6|A8MVZ6_HUMAN;NM_001003398#(-t:12_B1248247469242);sp|Q96G01-4|BICD1_HUMAN;sp|Q96G01-3|BICD1_HUMAN;NM_001714#(-t:12_B1248247469242);sp|Q96G01|BICD1_HUMAN;tr|F8VZX7|F8VZX7_HUMAN;tr|F8W056|F8W056_HUMAN;sp|Q96G01-2|BICD1_HUMAN	tr|A8MVZ6|A8MVZ6_HUMAN	yes	no	2	2.5517e-16	154.36	16519000
AAEFGEPTSEQTGTAAGK	R	18	0	1750.8	sp|O95425-2|SVIL_HUMAN;sp|O95425|SVIL_HUMAN;NM_021738#(r:10_S2347651028055)	sp|O95425-2|SVIL_HUMAN	yes	no	2	1.769e-25	116.06	11417000
AAEFLAACAGGDLDEAR	R	17	0	1735.78	tr|K7EL81|K7EL81_HUMAN;sp|Q9BZL4-3|PP12C_HUMAN;sp|Q9BZL4-4|PP12C_HUMAN;sp|Q9BZL4|PP12C_HUMAN;tr|B5MEC7|B5MEC7_HUMAN;sp|Q9BZL4-2|PP12C_HUMAN;NM_017607#(r:19_P5623772472771);NM_017607#(-s-:19_P8215012801973);NM_017607#(-s-:19_P8680318277468);NM_017607#(r:19_P2977180046618);NM_017607#(f-:19_P569891372747);NM_017607#(-s-:19_P353128880466);NM_017607#(r:19_P7849497911121);NM_017607#(-s-:19_P12816404027…	tr|K7EL81|K7EL81_HUMAN	yes	no	2	0.0026432	40.968	1098100
AAEFLQMLEAIK	K	12	0	1362.72	sp|P52739-2|ZN131_HUMAN;sp|P52739|ZN131_HUMAN;tr|D6RFI6|D6RFI6_HUMAN;tr|D6RAT8|D6RAT8_HUMAN;tr|D6RBK1|D6RBK1_HUMAN;tr|D6RJH2|D6RJH2_HUMAN;tr|D6R9I2|D6R9I2_HUMAN	sp|P52739-2|ZN131_HUMAN	yes	no	2,3	6.8148e-06	91.961	42416000
AAEFYINYVTR	K	11	0	1345.67	sp|Q9NVR2|INT10_HUMAN;NM_018142#(-s-:8_I2347845766700);NM_018142#(-t:8_I7483686891042);NM_018142#(-t:8_I2541982226190);NM_018142#(f-:8_I249157197632)	sp|Q9NVR2|INT10_HUMAN	yes	no	2	6.4672e-06	110.08	43563000
AAEGAEAQGFSGLFAAYTDHPPPFR	R	25	0	2606.22	sp|Q9P253|VPS18_HUMAN	sp|Q9P253|VPS18_HUMAN	yes	yes	3	9.1875e-99	169.08	35303000
AAEGGLSSPEFSELCIWLGSQIK	K	23	0	2478.21	sp|Q52LJ0-2|FA98B_HUMAN;sp|Q52LJ0|FA98B_HUMAN	sp|Q52LJ0-2|FA98B_HUMAN	yes	no	3	0.028204	22.569	23104000
AAEGVSAADMAK	K	12	0	1119.52	sp|Q9NW13|RBM28_HUMAN;NM_018077#(-s-:7_R5894444073634);sp|Q9NW13-2|RBM28_HUMAN;NM_018077#(-s-:7_R9513175593217)	sp|Q9NW13|RBM28_HUMAN	yes	no	2	1.1369e-05	105.65	174670000
AAEGWSAPILTLAR	R	14	0	1454.79	sp|Q96T51|RUFY1_HUMAN;NM_025158#(-s-:5_R8702293407244);NM_025158#(-s-:5_R3018461506478);NM_025158#(-s-:5_R4149963023490);NM_025158#(-s-s-:5_R9837792629699);NM_025158#(-s-s-:5_R2232203351982);NM_025158#(-s-s-s-:5_R216939311035);NM_025158#(-s-:5_R6849303945854);sp|Q96T51-3|RUFY1_HUMAN;NM_025158#(-s-s-:5_R6192331953711);NM_025158#(-s-s-s-:5_R3568385148733);NM_025158#(-s-:5_R7760212808773);NM_025158#…	sp|Q96T51|RUFY1_HUMAN	no	no	2	2.4782e-06	80.507	14380000
AAEHDLEVASEEEQER	K	16	0	1840.81	sp|Q9UPS8|ANR26_HUMAN;sp|Q9UPS8-3|ANR26_HUMAN;tr|E7ESJ3|E7ESJ3_HUMAN	sp|Q9UPS8|ANR26_HUMAN	yes	no	4	0.080661	32.702	51264
AAEIASSDSANVSSR	K	15	0	1463.69	sp|P42338|PK3CB_HUMAN	sp|P42338|PK3CB_HUMAN	yes	yes	2	2.7497e-12	113.4	16769000
AAEIGYEDPINPTYEATNAMYHR	R	23	0	2625.18	tr|E7EQL6|E7EQL6_HUMAN;sp|O43272-2|PROD_HUMAN;sp|O43272-1|PROD_HUMAN;sp|O43272|PROD_HUMAN;NM_016335#(r:22_P7893179268679);NM_016335#(-s-:22_P6070644662546);NM_016335#(-s-:22_P367464380902)	tr|E7EQL6|E7EQL6_HUMAN	yes	no	3	5.0739e-10	69.765	6528800
AAEINGEVDDDDAGGEWR	R	18	0	1917.8	tr|J3KNX9|J3KNX9_HUMAN;sp|Q92614|MY18A_HUMAN;sp|Q92614-4|MY18A_HUMAN;sp|Q92614-3|MY18A_HUMAN;sp|Q92614-5|MY18A_HUMAN;NM_078471#(-s-:17_M1812277327836);NM_078471#(-s-:17_M6793744154133);NM_078471#(-s-s-:17_M5611738439508);NM_203318#(-s-:17_M1812277327836);NM_078471#(-s-:17_M6520926553448);NM_203318#(-s-:17_M6793744154133);NM_078471#(f-T:17_M9491572888449);NM_078471#(-s-s-s-:17_M7261880073967);NM_2…	tr|J3KNX9|J3KNX9_HUMAN	no	no	2,3	1.6489e-66	223.76	17995000
AAEISAMLK	R	9	0	932.5	NM_015029#(-t:8_P5244121755241);sp|Q99575|POP1_HUMAN;tr|E5RK39|E5RK39_HUMAN	NM_015029#(-t:8_P5244121755241)	yes	no	2	0.003899	71.614	55394000
AAEIVLSALPDR	R	12	0	1253.7	sp|Q8WUY3-4|PRUN2_HUMAN;NM_015225#(-s-S-:9_P9148774206412);sp|Q8WUY3|PRUN2_HUMAN;sp|Q8WUY3-2|PRUN2_HUMAN;sp|Q8WUY3-3|PRUN2_HUMAN;NM_015225#(-s-:9_P8385555740007);NM_015225#(r:9_P5356113814446);tr|E9PDC2|E9PDC2_HUMAN;tr|H7BZH9|H7BZH9_HUMAN	sp|Q8WUY3-4|PRUN2_HUMAN	yes	no	2	0.0018	57.434	3473100
AAEIVPSDMYK	K	11	0	1222.59	sp|P49917|DNLI4_HUMAN	sp|P49917|DNLI4_HUMAN	yes	yes	2	7.1162e-05	96.229	18039000
AAEIYGVTHTR	R	11	0	1216.62	tr|F5H315|F5H315_HUMAN;sp|Q9HCS7|SYF1_HUMAN	tr|F5H315|F5H315_HUMAN	yes	no	2	0.055392	41.242	17156000
AAEKEAALVQQEEEKAEQR	K	19	2	2156.07	sp|Q15020|SART3_HUMAN;tr|B7ZKM0|B7ZKM0_HUMAN;NM_014706#(-t:12_S9651616195486);NM_014706#(-s-:12_S3170577691884);NM_014706#(-s-s-:12_S3883260197178);NM_014706#(-s-:12_S3851502440221);NM_014706#(-s-s-s-s-:12_S3227323002898);NM_014706#(-s-:12_S9483639110914);NM_014706#(-s-s-s-s-:12_S4265166015294);NM_014706#(-s-s-s-:12_S8778068293189);NM_014706#(-s-:12_S5208368911344);NM_014706#(-s-s-s-s-s-:12_S5397…	sp|Q15020|SART3_HUMAN	no	no	4	9.205e-10	112.44	7175500
AAEKELEQLKTEEEELQR	R	18	2	2172.09	NM_144508#(-s-:15_C3220153682395);NM_170589#(-s-:15_C3220153682395);sp|Q8NG31-2|CASC5_HUMAN;sp|Q8NG31|CASC5_HUMAN;tr|H0YCZ2|H0YCZ2_HUMAN	NM_144508#(-s-:15_C3220153682395)	yes	no	3	0.00022347	74.214	6108100
AAEKLYLADPMK	R	12	1	1348.71	sp|P49458|SRP09_HUMAN;NM_003133#(f-:1_S1010270373214);NM_003133#(f-:1_S1559234239577);NM_003133#(-s-:1_S1091380543330);tr|E9PE20|E9PE20_HUMAN;NM_003133#(-s-:1_S6114853319521);NM_001130440#(f-:1_S1010270373214);sp|P49458-2|SRP09_HUMAN;NM_003133#(-s-:1_S6955938024032);NM_001130440#(f-:1_S1559234239577);NM_001130440#(-s-:1_S1091380543330);NM_003133#(-s-S-:1_S8144324433248)	sp|P49458|SRP09_HUMAN	yes	no	3	2.407e-05	92.65	3790200
AAELAVQNEVGLVDNPLK	K	18	0	1879.01	sp|Q9NVM6|DJC17_HUMAN;NM_018163#(f-T:15_D5495181347965);NM_018163#(-t:15_D2346904918921)	sp|Q9NVM6|DJC17_HUMAN	yes	no	2,3	4.411e-35	138.98	36105000
AAELEEELK	K	9	0	1030.52	tr|K7EL81|K7EL81_HUMAN;sp|Q9BZL4-3|PP12C_HUMAN;sp|Q9BZL4-4|PP12C_HUMAN;sp|Q9BZL4|PP12C_HUMAN;tr|B5MEC7|B5MEC7_HUMAN;sp|Q9BZL4-2|PP12C_HUMAN;NM_017607#(r:19_P5623772472771);NM_017607#(-s-:19_P8215012801973);tr|B4DME2|B4DME2_HUMAN;tr|K7ER83|K7ER83_HUMAN	tr|K7EL81|K7EL81_HUMAN	yes	no	2	0.0012201	90.15	66513000
AAELEEELKALSDLR	K	15	1	1685.88	tr|K7EL81|K7EL81_HUMAN;sp|Q9BZL4-3|PP12C_HUMAN;sp|Q9BZL4-4|PP12C_HUMAN;sp|Q9BZL4|PP12C_HUMAN;tr|B5MEC7|B5MEC7_HUMAN;sp|Q9BZL4-2|PP12C_HUMAN;NM_017607#(r:19_P5623772472771);NM_017607#(-s-:19_P8215012801973);tr|B4DME2|B4DME2_HUMAN;tr|K7ER83|K7ER83_HUMAN	tr|K7EL81|K7EL81_HUMAN	yes	no	3	0.0012667	59.709	126220
AAELELEK	R	8	0	901.476	sp|Q8IUE1|TF2LX_HUMAN	sp|Q8IUE1|TF2LX_HUMAN	yes	yes	2	0.0043874	88.819	25679000
AAELEMELNEHSLVIDTLK	K	19	0	2154.09	sp|Q9UHV9|PFD2_HUMAN	sp|Q9UHV9|PFD2_HUMAN	yes	yes	2,3,4	4.6835e-44	152.01	278220000
AAELEMELNEHSLVIDTLKEVDETRK	K	26	2	3011.51	sp|Q9UHV9|PFD2_HUMAN	sp|Q9UHV9|PFD2_HUMAN	yes	yes	4,5	4.8245e-23	131.04	33406000
AAELETDIR	R	9	0	1016.51	NM_012469#(f-:20_P376393255676);sp|O94906|PRP6_HUMAN;sp|O94906-2|PRP6_HUMAN;NM_012469#(f-T:20_P332983751777);NM_012469#(-s-:20_P6072137748889);NM_012469#(-s-s-:20_P6876286865040);NM_012469#(-s-s-:20_P4354998175358);NM_012469#(-s-:20_P1496667181297);NM_012469#(-s-:20_P7609726871486);NM_012469#(-s-s-s-:20_P8844451882944);NM_012469#(-s-s-:20_P225171199762);NM_012469#(-s-:20_P6201763996652);NM_012469…	NM_012469#(f-:20_P376393255676)	yes	no	2	0.00073279	109.66	163020000
AAELFGLTAEEVYLVHDELDKPLGR	R	25	1	2784.43	sp|Q86Y79|PTH_HUMAN;tr|C9J7Z1|C9J7Z1_HUMAN	sp|Q86Y79|PTH_HUMAN	yes	no	3,4	1.2358e-30	125.11	113520000
AAELFHQLSQALEVLTDAAAR	R	21	0	2253.18	sp|Q9NVM6|DJC17_HUMAN;NM_018163#(f-T:15_D5495181347965);NM_018163#(-t:15_D2346904918921);tr|H0YLQ7|H0YLQ7_HUMAN;tr|H0YK99|H0YK99_HUMAN	sp|Q9NVM6|DJC17_HUMAN	yes	no	3,4	8.9409e-51	148.38	124360000
AAELFSQWMESSGK	K	14	0	1569.71	sp|Q6P179|ERAP2_HUMAN;sp|Q6P179-3|ERAP2_HUMAN	sp|Q6P179|ERAP2_HUMAN	yes	no	2	3.3636e-17	139.3	141600000
AAELFVETIAK	R	11	0	1190.65	NM_019896#(f-:2_P6405263182971);sp|Q9NR33|DPOE4_HUMAN;NM_019896#(-s-:2_P1889016556724)	NM_019896#(f-:2_P6405263182971)	yes	no	2	0.0028478	65.179	2990900
AAELIANSLATAGDGLIELR	K	20	0	1997.08	sp|P35232|PHB_HUMAN;NM_002634#(-t:17_P5768114140392);NM_002634#(-t:17_P8377586671799);NM_002634#(-t:17_P2211657225443);NM_002634#(f-T:17_P7087425171671);NM_002634#(f-:17_P8427936565568);NM_002634#(-s-:17_P8137026767645);tr|C9JW96|C9JW96_HUMAN;NM_002634#(-s-:17_P6954952156413);NM_002634#(-s-s-:17_P6797062889349);NM_002634#(-s-s-:17_P8253212387102);NM_002634#(-s-:17_P7931104998583)	sp|P35232|PHB_HUMAN	yes	no	2,3,4	4.7935e-79	223.5	6334400000
AAELIANSLATAGDGLIELRK	K	21	1	2125.17	sp|P35232|PHB_HUMAN;NM_002634#(-t:17_P5768114140392);NM_002634#(-t:17_P8377586671799);NM_002634#(-t:17_P2211657225443);NM_002634#(f-T:17_P7087425171671);NM_002634#(f-:17_P8427936565568);NM_002634#(-s-:17_P8137026767645);tr|C9JW96|C9JW96_HUMAN;NM_002634#(-s-:17_P6954952156413);NM_002634#(-s-s-:17_P6797062889349);NM_002634#(-s-s-:17_P8253212387102);NM_002634#(-s-:17_P7931104998583)	sp|P35232|PHB_HUMAN	yes	no	3	5.4494e-05	60.561	477950
AAELLMSCFR	K	10	0	1196.57	sp|Q5JVF3-3|PCID2_HUMAN;sp|Q5JVF3|PCID2_HUMAN;NM_018386#(f-t:13_P7977634356997);sp|Q5JVF3-2|PCID2_HUMAN;NM_018386#(f-:13_P3069485091812);NM_018386#(-s-:13_P3796604968344);NM_018386#(-t:13_P8596018476873);sp|Q5JVF3-4|PCID2_HUMAN;NM_018386#(-t:13_P8773040899808);NM_018386#(-t:13_P8285340467211);NM_018386#(-s-:13_P64566741465);NM_018386#(f-:13_P4714388104458);NM_018386#(-s-s-:13_P7030265236050);NM_0…	sp|Q5JVF3-3|PCID2_HUMAN	yes	no	2	2.7078e-07	129.85	118860000
AAELLQDEYSGR	K	12	0	1350.64	NM_018116#(rr:1_M1020652551320);NM_018116#(-s-s-:1_M2967965066856)	NM_018116#(rr:1_M1020652551320)	no	no	2,3	4.0756e-16	172.11	153940000
AAELQAQWER	R	10	0	1200.59	sp|O15020|SPTN2_HUMAN;sp|O15020-2|SPTN2_HUMAN;NM_006946#(r:11_S5487932570808)	sp|O15020|SPTN2_HUMAN	yes	no	2	4.9303e-08	137.98	56033000
AAELTATQVEEEEEEEDFRK	K	20	1	2352.06	sp|O75717|WDHD1_HUMAN;NM_007086#(f-:14_W4845004862675);NM_007086#(-t:14_W3921319989469);tr|C9JW18|C9JW18_HUMAN;tr|F8W7P7|F8W7P7_HUMAN	sp|O75717|WDHD1_HUMAN	yes	no	3	1.1355e-68	188.84	18864000
AAELTATQVEEEEEEEDFRKK	K	21	2	2480.16	sp|O75717|WDHD1_HUMAN;NM_007086#(f-:14_W4845004862675);NM_007086#(-t:14_W3921319989469);tr|C9JW18|C9JW18_HUMAN;tr|F8W7P7|F8W7P7_HUMAN	sp|O75717|WDHD1_HUMAN	yes	no	4	4.6822e-17	124.25	4624000
AAELWGEQAEAR	R	12	0	1329.63	NM_004486#(-s-:9_G7411077923850);NM_004486#(-s-e-e-e-e-S-:9_G8888119885615);sp|Q08379|GOGA2_HUMAN;NM_004486#(r:9_G7314119198362);NM_004486#(-s-s-:9_G1763911798378);NM_004486#(r:9_G1494110088924);NM_004486#(-s-s-s-:9_G1277720275267);NM_004486#(-s-:9_G2653486034861);NM_004486#(-t:9_G9869953064513);NM_004486#(r:9_G6356338904359);sp|Q08379-2|GOGA2_HUMAN;NM_004486#(r:9_G2967524960739)	NM_004486#(-s-:9_G7411077923850)	yes	no	2	2.9811e-05	86.772	94749000
AAEMEHLLER	R	10	0	1197.58	NM_032431#(r:11_S9074964064494);sp|Q86TM6-3|SYVN1_HUMAN;sp|Q86TM6|SYVN1_HUMAN;NM_032431#(-s-:11_S4898904442184);NM_172230#(-s-:11_S4898904442184);NM_032431#(-s-s-:11_S3620147957303);NM_172230#(-s-s-:11_S3620147957303);NM_032431#(r:11_S6445903539865);NM_172230#(r:11_S6445903539865);sp|Q86TM6-2|SYVN1_HUMAN;tr|E9PMA1|E9PMA1_HUMAN;NM_032431#(-s-s-:11_S3239985116286);NM_172230#(-s-s-:11_S3239985116286…	NM_032431#(r:11_S9074964064494)	yes	no	2,3	8.3478e-06	115.57	209700000
AAEMLSQLDLFSR	K	13	0	1479.74	sp|P78318|IGBP1_HUMAN;NM_001551#(-s-s-:X_I1697678677072);NM_001551#(-s-:X_I2792148586873);NM_001551#(-s-:X_I9507254768255);NM_001551#(f-T:X_I4772653439878);NM_001551#(-t:X_I3605612824328);NM_001551#(-s-:X_I5998944776137)	sp|P78318|IGBP1_HUMAN	yes	no	2,3	1.5846e-18	162.31	324530000
AAEMMASLLK	R	10	0	1063.54	sp|P33176|KINH_HUMAN;NM_004521#(f-T:10_K4758579266199);NM_004521#(-s-:10_K5492343485001);NM_004521#(-t:10_K3015588594857);NM_004521#(f-:10_K536776536860)	sp|P33176|KINH_HUMAN	yes	no	2	0.00026816	93.096	980040000
AAENNVFHLVATVCSQEEPVQPLLR	R	25	0	2820.42	sp|Q96CW6|S7A6O_HUMAN;tr|I3L3T2|I3L3T2_HUMAN	sp|Q96CW6|S7A6O_HUMAN	yes	no	3	1.0828e-06	55.588	650440
AAEPEVEVEVYR	K	12	0	1389.68	sp|Q6ICG6-3|K0930_HUMAN;NM_001009880#(-s-:22_C5717815803397);NM_015264#(-s-:22_C5717815803397);tr|B0AZU2|B0AZU2_HUMAN;sp|Q6ICG6|K0930_HUMAN;sp|Q6ICG6-2|K0930_HUMAN;tr|B0QY18|B0QY18_HUMAN;NM_001009880#(-s-s-s-:22_C4284964300441);NM_015264#(-s-s-s-:22_C4284964300441);NM_001009880#(f-T:22_C2992679080780);NM_015264#(f-T:22_C2992679080780);NM_001009880#(-t:22_C5536894775942);NM_001009880#(f-:22_C15815…	sp|Q6ICG6-3|K0930_HUMAN	yes	no	2	5.1451e-05	78.903	3163900
AAEPLLTLER	R	10	0	1111.62	sp|O60524-4|NEMF_HUMAN;sp|O60524|NEMF_HUMAN;tr|G3V5V3|G3V5V3_HUMAN;sp|O60524-5|NEMF_HUMAN;sp|O60524-3|NEMF_HUMAN;NM_004713#(r:14_S2701812586557);tr|G3V4D9|G3V4D9_HUMAN	sp|O60524-4|NEMF_HUMAN	yes	no	2	0.019983	46.64	249950000
AAEPNKTEIQTLFK	M	14	1	1588.85	sp|Q8N6H7|ARFG2_HUMAN;NM_032389#(f-t:11_A9007924046024);NM_032389#(-t:11_A6220658720950);NM_032389#(r:11_A5290036681183);NM_032389#(-s-:11_A7162710050367);tr|G5E9L0|G5E9L0_HUMAN;NM_032389#(-s-:11_A5709864017587);NM_032389#(-t:11_A3133275573299);NM_032389#(r:11_A971813610452);NM_032389#(-s-s-:11_A3517087749984);tr|E9PQP3|E9PQP3_HUMAN;tr|E9PIY6|E9PIY6_HUMAN;NM_032389#(-t:11_A6890774768568);tr|E9PMU…	sp|Q8N6H7|ARFG2_HUMAN	no	no	2	6.4746e-10	140.27	549700000
AAEPQEQEFGK	R	11	0	1232.57	sp|Q9C0C2|TB182_HUMAN;NM_033396#(f-T:11_T87098581313);NM_033396#(-t:11_T183688476052);sp|Q9C0C2-2|TB182_HUMAN	sp|Q9C0C2|TB182_HUMAN	yes	no	2	1.1015e-06	122.69	48499000
AAEPVEDNCINFVAMK	M	16	0	1806.83	sp|Q14116-2|IL18_HUMAN;sp|Q14116|IL18_HUMAN	sp|Q14116-2|IL18_HUMAN	yes	no	2,3	3.2643e-14	107.74	375390000
AAEQAGCMVSASR	R	13	0	1336.59	NM_001040273#(-s-:10_T5801823867774);sp|Q2T9J0|TYSD1_HUMAN;NM_001040273#(-s-:10_T9301586872903);sp|Q2T9J0-2|TYSD1_HUMAN;NM_001040273#(-s-s-:10_T4691608363094)	NM_001040273#(-s-:10_T5801823867774)	yes	no	2	2.3247e-06	86.756	6000600
AAEQAHLWAELVFLYDK	R	17	0	2003.02	sp|Q00610-2|CLH1_HUMAN;sp|Q00610|CLH1_HUMAN;NM_004859#(-s-:17_C2758731975888);tr|J3KS13|J3KS13_HUMAN;sp|P53675|CLH2_HUMAN;sp|P53675-2|CLH2_HUMAN	sp|Q00610-2|CLH1_HUMAN	no	no	3	0.019094	22.051	6313000
AAEQISWYK	K	9	0	1094.54	sp|Q9H6R3|ACSS3_HUMAN;NM_024560#(-s-:12_A1935436113069)	sp|Q9H6R3|ACSS3_HUMAN	yes	no	2	0.00052532	111.61	42667000
AAEQISWYKPWTK	K	13	1	1606.81	sp|Q9H6R3|ACSS3_HUMAN;NM_024560#(-s-:12_A1935436113069)	sp|Q9H6R3|ACSS3_HUMAN	yes	no	2,3	5.5549e-08	119.96	119370000
AAEQYTPK	R	8	0	906.445	sp|P49327|FAS_HUMAN;NM_004104#(f-:17_F1077701467315);NM_004104#(-s-:17_F2914674533955);NM_004104#(-s-:17_F2955763659391);NM_004104#(-t:17_F8810097319914);NM_004104#(-s-s-:17_F3338822613971);NM_004104#(f-:17_F8465271853650);NM_004104#(-s-:17_F3214771148080);NM_004104#(r:17_F8997999164453);NM_004104#(f-t:17_F5488199791338);NM_004104#(-t:17_F2952608284637);NM_004104#(-s-:17_F8878905945369);NM_004104…	sp|P49327|FAS_HUMAN	no	no	2	0.0041235	101.54	74647000
AAESALQVVEK	M	11	0	1143.61	NM_003198#(-s-:1_T674764770829);NM_003198#(-t:1_T5622462400703);NM_003198#(-s-s-:1_T2987472500474);NM_003198#(-s-:1_T8346563488936);sp|Q14241|ELOA1_HUMAN;NM_003198#(-s-s-s-:1_T3754922055943);NM_003198#(-s-s-:1_T7311780548514);NM_003198#(-s-:1_T3032096785993)	NM_003198#(-s-:1_T674764770829)	yes	no	2	5.6595e-05	98.156	78294000
AAESETPGKSPEK	K	13	1	1329.64	tr|J3QSV6|J3QSV6_HUMAN;tr|B4DJ58|B4DJ58_HUMAN;NM_015659#(-s-:16_R7736344234020)	tr|J3QSV6|J3QSV6_HUMAN	no	no	3	0.020242	52.101	4324900
AAESIDQKNDSQLVIEAYK	K	19	1	2121.06	sp|Q96RU3-4|FNBP1_HUMAN;sp|Q96RU3-3|FNBP1_HUMAN;tr|E9PGQ4|E9PGQ4_HUMAN;sp|Q96RU3-2|FNBP1_HUMAN;sp|Q96RU3|FNBP1_HUMAN;NM_015033#(-s-s-:9_F6820078108802);NM_015033#(-t-f-:9_F5768039111021);NM_015033#(-s-:9_F211208307663);tr|H0Y7W6|H0Y7W6_HUMAN	sp|Q96RU3-4|FNBP1_HUMAN	no	no	3	0.00011816	69.765	1940600
AAESLADPTEYENLFPGLK	K	19	0	2064.01	NM_004766#(-s-:3_C2308742976719);NM_004766#(-t:3_C2290820663324);sp|P35606|COPB2_HUMAN;tr|B4DZI8|B4DZI8_HUMAN;NM_004766#(-s-:3_C421555163953);NM_004766#(-s-:3_C4382627292069);NM_004766#(f-:3_C8505079549959);NM_004766#(-s-s-:3_C4224523409131);NM_004766#(-s-:3_C8416760433260);NM_004766#(-s-:3_C7063619330336);NM_004766#(-s-:3_C7038655154690);NM_004766#(-s-s-s-:3_C8772490575610);NM_004766#(-s-s-:3_C5…	NM_004766#(-s-:3_C2308742976719)	yes	no	2,3	5.5587e-55	176.26	738620000
AAESLTAIPEPASPQLLETPIHASQIQK	R	28	0	2939.56	sp|Q14676|MDC1_HUMAN;NM_014641#(-s-:6_M3763810950038);tr|E9PGY5|E9PGY5_HUMAN;sp|Q14676-2|MDC1_HUMAN;tr|E7EVA7|E7EVA7_HUMAN;sp|Q14676-3|MDC1_HUMAN;NM_014641#(r:6_M1727986276489);tr|F8VV34|F8VV34_HUMAN;tr|F8W1C2|F8W1C2_HUMAN;tr|F8VZP8|F8VZP8_HUMAN;tr|F8VU38|F8VU38_HUMAN;NM_014641#(r:6_M1766021592626)	sp|Q14676|MDC1_HUMAN	yes	no	3,4	4.592e-99	169.6	564730000
AAESPDQKDTDGGPKEEESPV	K	21	2	2184.97	sp|P53985|MOT1_HUMAN	sp|P53985|MOT1_HUMAN	yes	yes	3	9.4642e-12	122.18	7491000
AAESSSDSSDSDSSEDDEAPSKPAGTTK	K	28	1	2757.12	sp|Q14978-2|NOLC1_HUMAN;NM_004741#(-t-e-e-f-:10_N6929983250248);sp|Q14978|NOLC1_HUMAN;sp|Q14978-3|NOLC1_HUMAN;NM_004741#(f-:10_N1160295541390);NM_004741#(-s-:10_N1783412506962);NM_004741#(-s-s-:10_N9906250713433);NM_004741#(-s-s-s-:10_N1168070287722);NM_004741#(-s-:10_N27708844615)	sp|Q14978-2|NOLC1_HUMAN	yes	no	3	0.069272	37.526	3174700
AAESVSKPDVSEEAPGPSK	K	19	1	1883.91	NM_016407#(-t:20_C5899252571380);NM_016407#(f-:20_C5791112680219);sp|Q9BY42|RTF2_HUMAN;NM_016407#(-s-:20_C1294342639132);NM_016407#(-s-s-s-:20_C3079371570840);NM_016407#(-s-:20_C317535075565);tr|A8MSH5|A8MSH5_HUMAN;NM_016407#(-s-:20_C1411198160914);tr|A2A2L5|A2A2L5_HUMAN;NM_016407#(f-T:20_C1096471259283);NM_016407#(-s-:20_C8698961774842)	NM_016407#(-t:20_C5899252571380)	yes	no	3	1.2183e-53	193.85	140330000
AAETDPGMVHLALGSDLTTLGLNLNSPENLYPK	R	33	0	3450.73	NM_014515#(-s-:12_C5306105580054);tr|F8VV52|F8VV52_HUMAN;NM_014515#(-s-:12_C7381629151809);sp|Q9NZN8|CNOT2_HUMAN;NM_014515#(f-:12_C6504213763297);NM_014515#(-s-:12_C1418287457823);NM_014515#(-s-s-:12_C9353005743286);NM_014515#(-s-:12_C6580870174140);NM_014515#(-s-:12_C4536048128973);NM_014515#(-s-s-s-:12_C1331938123689);NM_014515#(f-:12_C7179740845010);NM_014515#(-s-s-:12_C4427346300470);sp|Q9NZN…	NM_014515#(-s-:12_C5306105580054)	yes	no	3,4	1.9845e-108	172	58898000
AAETHFGFETVSEEEK	R	16	0	1809.81	sp|Q5HYK3|COQ5_HUMAN;tr|B4DP72|B4DP72_HUMAN;tr|F8VVW7|F8VVW7_HUMAN;NM_032314#(r:12_C1140084382001);sp|Q5HYK3-2|COQ5_HUMAN	sp|Q5HYK3|COQ5_HUMAN	yes	no	3	1.8199e-56	232.28	73306000
AAETHFGFETVSEEEKGGK	R	19	1	2051.94	sp|Q5HYK3|COQ5_HUMAN;tr|B4DP72|B4DP72_HUMAN;tr|F8VVW7|F8VVW7_HUMAN;NM_032314#(r:12_C1140084382001);sp|Q5HYK3-2|COQ5_HUMAN	sp|Q5HYK3|COQ5_HUMAN	yes	no	3,4	8.7896e-27	135.18	16318000
AAETIIDTK	K	9	0	960.513	sp|Q9GZS1-2|RPA49_HUMAN;sp|Q9GZS1|RPA49_HUMAN;tr|E7EX70|E7EX70_HUMAN	sp|Q9GZS1-2|RPA49_HUMAN	yes	no	2,3	0.00080586	109.66	24491000
AAETLNFGPEWLR	M	13	0	1502.75	NM_022574#(r:7_G1942384300597);sp|O75420|PERQ1_HUMAN;NM_022574#(r:7_G5289126761364);NM_022574#(r:7_G2464719344760)	NM_022574#(r:7_G1942384300597)	yes	no	2,3	1.9508e-07	110.38	103830000
AAETQTLNFGPEWLR	M	15	0	1731.86	sp|Q6Y7W6-4|PERQ2_HUMAN;NM_001103148#(-t:2_G1434228085054);NM_015575#(-t:2_G1434228085054);sp|Q6Y7W6|PERQ2_HUMAN;tr|I1E4Y6|I1E4Y6_HUMAN;NM_001103147#(-t:2_G1434228085054);sp|Q6Y7W6-3|PERQ2_HUMAN;NM_001103148#(r:2_G7593933829005);NM_015575#(r:2_G7593933829005);NM_001103147#(r:2_G7593933829005);tr|E7ESB6|E7ESB6_HUMAN;NM_001103148#(f-T:2_G5695496579419);NM_001103148#(f-:2_G8537491942264);NM_015575#(…	sp|Q6Y7W6-4|PERQ2_HUMAN	yes	no	2,3	2.3802e-41	238.43	222260000
AAETTVVEVEEIVDIGAFAPEDIHIPQIYVHR	K	32	0	3559.82	sp|P55809|SCOT1_HUMAN;tr|E9PDW2|E9PDW2_HUMAN	sp|P55809|SCOT1_HUMAN	yes	no	4	7.3115e-05	40.067	1222200
AAETVVDPEMTPYLDIANQTGR	R	22	0	2390.14	NM_016118#(-s-:7_N3836121564682);sp|Q9Y5A7-2|NUB1_HUMAN;NM_016118#(f-:7_N6236796965193);sp|Q9Y5A7|NUB1_HUMAN;tr|H3BM14|H3BM14_HUMAN;tr|H3BM74|H3BM74_HUMAN;NM_016118#(-s-:7_N7410618109870);tr|F8WDB6|F8WDB6_HUMAN;NM_016118#(f-:7_N2635909409173);tr|C9JRT6|C9JRT6_HUMAN	NM_016118#(-s-:7_N3836121564682)	yes	no	2,3	1.0475e-77	172.3	106380000
AAEVEMQLR	R	9	0	1045.52	NM_001099409#(-s-s-:11_E8719896555106);sp|Q8N3D4|EH1L1_HUMAN;NM_001099409#(f-:11_E1704050829847);NM_001099409#(r:11_E9709866059035);NM_001099409#(-s-s-:11_E7495192610083);NM_001099409#(r:11_E4043904204176);NM_001099409#(-t:11_E5669484664571);NM_001099409#(-s-s-s-:11_E1245274323540);NM_001099409#(-s-:11_E1042072078681);NM_001099409#(-s-:11_E2213341021798);NM_001099409#(-s-s-s-:11_E8461079705190);N…	NM_001099409#(-s-s-:11_E8719896555106)	no	no	2	0.064422	39.213	12383000
AAEVLNK	K	7	0	743.418	NM_005968#(-s-s-:19_H8089821780449);NM_031203#(-s-s-:19_H8089821780449);NM_031203#(-s-s-s-:19_H6472598747493);NM_005968#(-s-:19_H5564937080877);NM_031203#(-s-:19_H5564937080877);tr|M0R019|M0R019_HUMAN	NM_005968#(-s-:19_H5564937080877)	no	no	2	0.0079149	114.19	272220000
AAEVLPSAR	M	9	0	912.503	sp|Q9GZS1-2|RPA49_HUMAN	sp|Q9GZS1-2|RPA49_HUMAN	yes	yes	2	0.045063	51.276	17837000
AAEVPNEELINLLLK	K	15	0	1664.93	sp|Q709C8-3|VP13C_HUMAN;sp|Q709C8|VP13C_HUMAN;NM_017684#(f-T:15_V4679637293782);NM_020821#(f-T:15_V4679637293782);sp|Q709C8-4|VP13C_HUMAN;sp|Q709C8-2|VP13C_HUMAN;NM_018080#(f-T:15_V4679637293782);NM_001018088#(f-T:15_V4679637293782);NM_017684#(-t:15_V4653868580470);NM_020821#(-t:15_V4653868580470);NM_017684#(f-:15_V5494540002587);NM_020821#(f-:15_V5494540002587)	sp|Q709C8-3|VP13C_HUMAN	yes	no	2,3	1.539e-32	153.7	155430000
AAEVWMDEFK	R	10	0	1224.55	sp|Q8IXK2|GLT12_HUMAN;sp|Q8IXK2-2|GLT12_HUMAN	sp|Q8IXK2|GLT12_HUMAN	yes	no	2	0.00027605	88.596	18886000
AAEVWMDEYK	R	10	0	1240.54	sp|Q10471|GALT2_HUMAN;NM_004481#(-s-:1_G6853730535890);tr|G3V1S6|G3V1S6_HUMAN;NM_004481#(-s-:1_G1975552005902);NM_004481#(-s-s-:1_G4149592456124);NM_004481#(-s-s-:1_G2742190043500);NM_004481#(-s-:1_G876945870503);NM_004481#(-s-s-:1_G9719348451118);NM_004481#(-s-s-s-s-:1_G4826499651647);NM_004481#(r:1_G1432775244388);NM_004481#(-s-s-:1_G793934342563);NM_004481#(-s-s-s-:1_G7436750680687);NM_004481#…	sp|Q10471|GALT2_HUMAN	no	no	2	1.8928e-05	112.13	717030000
AAEVWMDEYKEHFYNR	R	16	1	2086.92	tr|F8VUJ3|F8VUJ3_HUMAN;sp|Q8N4A0|GALT4_HUMAN;sp|Q8N4A0-2|GALT4_HUMAN	tr|F8VUJ3|F8VUJ3_HUMAN	yes	no	4	1.7327e-06	77.431	2527500
AAEVYFGDLELFEPFDHPEESIPKPVHTR	M	29	1	3368.64	sp|Q6NZY4|ZCHC8_HUMAN;NM_017612#(-s-:12_Z2653468129240)	sp|Q6NZY4|ZCHC8_HUMAN	yes	no	3,4	6.0307e-16	103.85	42378000
AAEWLFPLAFSK	R	12	0	1378.73	sp|Q6SZW1|SARM1_HUMAN;sp|Q6SZW1-2|SARM1_HUMAN;NM_015077#(-t:17_S6200231613689);NM_015077#(r:17_S8169978004062)	sp|Q6SZW1|SARM1_HUMAN	yes	no	2	0.031261	37.525	1128600
AAEWQLDQPSWSGR	R	14	0	1629.75	NM_018090#(f-:1_N9451557839758);NM_018090#(-t:1_N5316395644609);sp|Q9NVZ3|NECP2_HUMAN;sp|Q9NVZ3-2|NECP2_HUMAN;NM_018090#(f-T:1_N3328692738675);sp|Q9NVZ3-3|NECP2_HUMAN;tr|F6SKB8|F6SKB8_HUMAN;sp|Q9NVZ3-4|NECP2_HUMAN;tr|D6RAN6|D6RAN6_HUMAN;tr|H0Y970|H0Y970_HUMAN	NM_018090#(f-:1_N9451557839758)	yes	no	2,3	1.7941e-33	227.63	447060000
AAEWYNIDFSLQNQLR	R	16	0	1966.95	NM_002018#(f-:17_F8104277352339)	NM_002018#(f-:17_F8104277352339)	no	no	2,3	1.1886e-09	79.471	63347000
AAFADSSGQHPPDACAFR	K	18	0	1903.83	sp|Q92826|HXB13_HUMAN	sp|Q92826|HXB13_HUMAN	yes	yes	3	4.5571e-09	77.506	40921000
AAFAELHNCIIDK	K	13	0	1500.74	sp|Q9NUQ6-2|SPS2L_HUMAN;NM_001100424#(f-:2_L2508012122609);tr|F8W6C2|F8W6C2_HUMAN;tr|C9JW67|C9JW67_HUMAN;tr|H7C2G5|H7C2G5_HUMAN;tr|B4DT67|B4DT67_HUMAN	sp|Q9NUQ6-2|SPS2L_HUMAN	no	no	2,3	2.3497e-06	82.651	286030000
AAFAHFPELYDFALSNVAEVDTR	R	23	0	2582.24	NM_014691#(-t:15_A3231270674965);NM_014691#(-s-:15_A3630445621940);sp|O60306|AQR_HUMAN;NM_014691#(f-:15_A899118114959);NM_014691#(-s-s-:15_A8482846403074);NM_014691#(-s-:15_A5701020518081);NM_014691#(-s-:15_A3133291824381);tr|H0YH15|H0YH15_HUMAN	NM_014691#(-t:15_A3231270674965)	yes	no	3	6.3617e-55	143.4	46504000
AAFALGGLGSGFASNR	R	16	0	1494.76	sp|P27708|PYR1_HUMAN;NM_004341#(-s-:2_C4125949106984);NM_004341#(-t:2_C5043093094460);tr|F8VPD4|F8VPD4_HUMAN;NM_004341#(f-:2_C367188441482);NM_004341#(r:2_C5520111712499)	sp|P27708|PYR1_HUMAN	yes	no	2,3	5.2745e-17	113.65	444330000
AAFAVEPQGPALGSEPMMLGSPTSPK	M	26	0	2569.26	sp|Q8NFH5|NUP53_HUMAN;NM_138285#(-t:2_N5988269226267);tr|F8WCF5|F8WCF5_HUMAN;tr|F8WEL4|F8WEL4_HUMAN	sp|Q8NFH5|NUP53_HUMAN	yes	no	3	8.4013e-16	103.75	19534000
AAFCLEELMMTNPHNHLYCQQYAEVK	K	26	0	3196.42	sp|Q15006|EMC2_HUMAN;NM_014673#(-t:8_T1128674465412);NM_014673#(-s-:8_T7792249509593);NM_014673#(f-:8_T3965142060180);NM_014673#(f-T:8_T853179214686);NM_014673#(-s-:8_T1682315870056);NM_014673#(-t:8_T1753458045146)	sp|Q15006|EMC2_HUMAN	yes	no	4	1.0373e-116	206.94	222510000
AAFDDAIAELDTLSEESYK	K	19	0	2086.96	sp|P62258|1433E_HUMAN;NM_006761#(-t:17_Y4032924005917);NM_006761#(-t:17_Y3778431063895);NM_006761#(f-T:17_Y3171737188806);NM_006761#(f-:17_Y2132266236782);NM_006761#(-t:17_Y3144314746492);NM_006761#(-s-:17_Y9366402543699);NM_006761#(f-T:17_Y2652305168291);NM_006761#(f-:17_Y1165115847762);sp|P62258-2|1433E_HUMAN;NM_006761#(f-:17_Y3504011776638);NM_006761#(-s-:17_Y2079574167084);NM_006761#(-t:17_Y7…	sp|P62258|1433E_HUMAN	yes	no	2	1.9465e-08	71.592	1943100
AAFECMYTLLDSCLDR	K	16	0	1963.85	NM_018448#(-t:12_C2523396157092);sp|Q86VP6|CAND1_HUMAN;NM_018448#(f-:12_C8319591184912);NM_018448#(f-T:12_C3362732543970);NM_018448#(f-:12_C6503560753947);sp|Q86VP6-2|CAND1_HUMAN;NM_018448#(f-T:12_C1453815144964);NM_018448#(-t:12_C5626941285594);NM_018448#(r:12_C9388579233762)	NM_018448#(-t:12_C2523396157092)	yes	no	2,3	1.4497e-14	94.45	109700000
AAFEELEK	R	8	0	935.46	sp|Q13439-4|GOGA4_HUMAN;sp|Q13439|GOGA4_HUMAN;tr|H0Y6I0|H0Y6I0_HUMAN;NM_002078#(f-:3_G3000813895735);tr|E7EVX2|E7EVX2_HUMAN	sp|Q13439-4|GOGA4_HUMAN	no	no	2	0.0024931	114.28	150000000
AAFENWEVEVTFR	K	13	0	1596.76	sp|P49257|LMAN1_HUMAN	sp|P49257|LMAN1_HUMAN	yes	yes	2,3	3.5915e-17	170.66	59179000
AAFERESDVPLKTEEFEVTK	K	20	2	2324.15	sp|Q969H8|CS010_HUMAN;tr|M0QYN0|M0QYN0_HUMAN;tr|M0QXF7|M0QXF7_HUMAN	sp|Q969H8|CS010_HUMAN	yes	no	3,4	2.313e-12	119.27	23781000
AAFFAER	R	7	0	810.402	NM_006726#(f-:4_L4835817596158);tr|F5H1X8|F5H1X8_HUMAN;sp|P50851-2|LRBA_HUMAN;sp|P50851|LRBA_HUMAN;NM_006726#(f-:4_L7262457778787);NM_006726#(-t:4_L88093839601);NM_006726#(f-T:4_L9887297831485);NM_006726#(f-:4_L7626672515106);NM_006726#(f-T:4_L6473852444060);NM_006726#(-t:4_L5640241319111);NM_006726#(-t-e-f-:4_L3236394441138);tr|E9PEM5|E9PEM5_HUMAN;tr|H0YAC6|H0YAC6_HUMAN	tr|F5H1X8|F5H1X8_HUMAN	no	no	2	0.022665	79.469	21089000
AAFFVTLDETEEGYR	K	15	0	1746.81	sp|P50416|CPT1A_HUMAN;sp|P50416-2|CPT1A_HUMAN	sp|P50416|CPT1A_HUMAN	yes	no	2,3	7.6201e-32	157.86	78031000
AAFGCFGNWLATVEQR	K	16	0	1825.86	sp|Q8IWA0|WDR75_HUMAN;NM_032168#(r:2_W934103161090);NM_032168#(-s-:2_W6344363393562)	sp|Q8IWA0|WDR75_HUMAN	yes	no	2,3	5.7223e-05	58.98	34039000
AAFGEEVDAVDTGISR	K	16	0	1635.77	sp|O00273-2|DFFA_HUMAN;NM_213566#(-s-:1_D4893744807916);sp|O00273|DFFA_HUMAN;NM_004401#(-s-:1_D4893744807916)	sp|O00273|DFFA_HUMAN	no	no	2,3	6.7093e-24	138.01	235420000
AAFGGAEHVPPELWEPFYTDQYAQEHVKPPVTR	R	33	1	3765.82	sp|Q9P1Y5|CAMP3_HUMAN;sp|Q9P1Y5-2|CAMP3_HUMAN;NM_020902#(-t:19_K4093951946375);NM_001080429#(-t:19_K4093951946375)	sp|Q9P1Y5|CAMP3_HUMAN	yes	no	4,5	5.4157e-11	74.973	26015000
AAFGILSYEHR	M	11	0	1262.64	sp|Q93074-3|MED12_HUMAN;NM_005120#(-t:X_M9571181045288);sp|Q93074|MED12_HUMAN;sp|Q93074-2|MED12_HUMAN;NM_005120#(-s-:X_M1071353011600);NM_005120#(r:X_M3899132097778);NM_005120#(r:X_M5272558266393)	sp|Q93074-3|MED12_HUMAN	yes	no	2	0.00018075	83.081	39507000
AAFGISDSYVDGSSFDPQR	R	19	0	2017.9	NM_016333#(-s-:16_S3150366581722);NM_016333#(-t:16_S7796522931896);NM_016333#(-t:16_S3283069536102);sp|Q9UQ35|SRRM2_HUMAN;NM_016333#(-t:16_S3919570444196);NM_016333#(-t:16_S3890529769320);NM_016333#(-s-:16_S9875395556856);NM_016333#(f-:16_S7257314503519);NM_016333#(f-:16_S3096529065077);NM_016333#(r:16_S604143250341);sp|Q9UQ35-2|SRRM2_HUMAN;tr|I3L2L6|I3L2L6_HUMAN;NM_016333#(f-:16_S7364636967394);…	NM_016333#(-s-:16_S3150366581722)	yes	no	2,3	9.5395e-62	217.88	328190000
AAFGISDSYVDGSSFDPQRR	R	20	1	2174	NM_016333#(-s-:16_S3150366581722);NM_016333#(-t:16_S7796522931896);NM_016333#(-t:16_S3283069536102);sp|Q9UQ35|SRRM2_HUMAN;NM_016333#(-t:16_S3919570444196);NM_016333#(-t:16_S3890529769320);NM_016333#(-s-:16_S9875395556856);NM_016333#(f-:16_S7257314503519);NM_016333#(f-:16_S3096529065077);NM_016333#(r:16_S604143250341);sp|Q9UQ35-2|SRRM2_HUMAN;tr|I3L2L6|I3L2L6_HUMAN;NM_016333#(f-:16_S7364636967394);…	NM_016333#(-s-:16_S3150366581722)	yes	no	3	7.2828e-18	110.74	34418000
AAFGLSEAGFNTACVTK	R	17	0	1742.83	sp|P31040|DHSA_HUMAN;NM_004168#(-t:5_S2897159470236);NM_004168#(f-T:5_S6668290808792);NM_004168#(-t:5_S4250242643143);tr|D6RFM5|D6RFM5_HUMAN;tr|E9PBJ5|E9PBJ5_HUMAN;NM_004168#(-s-s-:5_S6915225015128);NM_004168#(-s-s-:5_S225948812879);NM_004168#(-s-:5_S3695207634622);NM_004168#(-s-s-:5_S4095121953031);NM_004168#(-t:5_S1826325406770);NM_004168#(-s-s-s-s-:5_S9860777265568);NM_004168#(f-T:5_S652287968…	sp|P31040|DHSA_HUMAN	yes	no	2,3	1.8122e-37	151.8	1787700000
AAFGQGSGPIMLDEVQCTGTEASLADCK	R	28	0	2912.3	NM_005567#(f-:17_L1588017636703);NM_005567#(-s-:17_L9166628447208);sp|Q08380|LG3BP_HUMAN;tr|K7EP36|K7EP36_HUMAN;tr|K7EKQ5|K7EKQ5_HUMAN;tr|K7ERZ6|K7ERZ6_HUMAN;tr|K7EJD3|K7EJD3_HUMAN	NM_005567#(f-:17_L1588017636703)	yes	no	2,3	6.4429e-119	186.34	120740000
AAFGTQAPDPGSTESLQEKPMEIAPSAGFGGSLHPGAR	K	38	1	3765.81	NM_003565#(-s-:12_U7601558092995);NM_003565#(-s-:12_U877126305490);NM_003565#(-t:12_U234228674500);sp|O75385|ULK1_HUMAN;NM_003565#(r:12_U8902751599780);NM_003565#(r:12_U6688996403591);NM_003565#(-s-s-:12_U4262036777601);NM_003565#(-s-s-s-s-:12_U8669539468386);NM_003565#(-s-:12_U2744841253244);NM_003565#(-s-s-:12_U7933022488226);NM_003565#(-s-:12_U4317203632391);NM_003565#(-s-s-s-:12_U725171106652…	NM_003565#(-s-:12_U7601558092995)	no	no	4	0.047731	34.734	1945900
AAFLGCLTDVR	R	11	0	1221.62	sp|Q9UID3|VPS51_HUMAN;NM_013265#(r:11_C5615270204759);NM_013265#(f-:11_C5805893665212);sp|Q9UID3-2|VPS51_HUMAN;NM_013265#(-s-:11_C4289365225292)	sp|Q9UID3|VPS51_HUMAN	yes	no	2	0.0065257	49.448	159500000
AAFLNFFR	R	8	0	984.518	sp|Q5JTZ9|SYAM_HUMAN;NM_020745#(r:6_A8878802713743)	sp|Q5JTZ9|SYAM_HUMAN	yes	no	2	0.00060449	131.04	21460000
AAFNSGK	R	7	0	693.345	NM_002046#(-t:12_G2869033650173);NM_002046#(f-t:12_G9451828262466);NM_002046#(f-t:12_G2052614034495);NM_002046#(f-t:12_G1298358771093);NM_002046#(-s-s-:12_G7062638251260);NM_002046#(-s-s-:12_G4764961685425);NM_002046#(-s-s-s-:12_G4201314740945);NM_002046#(-s-s-s-s-:12_G2425684036601);NM_002046#(-s-s-s-:12_G6123219303967);NM_002046#(f-T:12_G7279958200385);NM_002046#(-t:12_G7497008237816);NM_002046…	NM_002046#(f-T:12_G7279958200385)	no	no	2	0.0062599	134.44	1210700000
AAFPQYQPVVMLEK	K	14	0	1619.84	sp|Q9UHN6|TMEM2_HUMAN;sp|Q9UHN6-2|TMEM2_HUMAN;tr|B4E1B9|B4E1B9_HUMAN;tr|H3BLX9|H3BLX9_HUMAN;tr|H3BLY0|H3BLY0_HUMAN	sp|Q9UHN6|TMEM2_HUMAN	yes	no	2,3	0.00018898	51.643	25148000
AAFQLDCSIVSR	K	12	0	1365.67	sp|O75054|IGSF3_HUMAN;tr|A6NJZ6|A6NJZ6_HUMAN;sp|O75054-2|IGSF3_HUMAN;NM_001007237#(-s-:1_I671577742725);NM_001542#(-s-:1_I671577742725)	sp|O75054|IGSF3_HUMAN	yes	no	2	0.00014253	69.846	10413000
AAFQLGSPWR	R	10	0	1131.58	NM_000690#(f-:12_A8146056731243);sp|P05091|ALDH2_HUMAN;NM_000690#(r:12_A28617093639);NM_000690#(-t:12_A9742919985010);NM_000690#(-s-:12_A260055996341);NM_000690#(-s-:12_A1619998722768);NM_000690#(f-:12_A5878837588915);NM_000690#(f-t:12_A482332013352);tr|F8VXI5|F8VXI5_HUMAN;NM_000690#(-s-s-:12_A1429889544727);NM_000690#(-t:12_A8871468764904);NM_000690#(-s-s-:12_A8401415238388);NM_000690#(-s-:12_A2…	NM_000690#(f-:12_A8146056731243)	yes	no	2	1.0784e-07	182.39	1087100000
AAFQPEANPSHLTLNTALVESEDL	K	24	0	2566.26	sp|Q8WX93-3|PALLD_HUMAN;sp|Q8WX93|PALLD_HUMAN;sp|Q8WX93-8|PALLD_HUMAN;sp|Q8WX93-5|PALLD_HUMAN;sp|Q8WX93-4|PALLD_HUMAN;NM_016081#(-s-s-s-:4_P4013897084332);NM_016081#(-s-:4_P2257436930971);sp|Q8WX93-7|PALLD_HUMAN;NM_016081#(-s-s-s-s-s-:4_P6879615399419);NM_016081#(-s-s-s-s-s-s-s-:4_P8291202815683);NM_016081#(-s-s-s-s-s-s-s-s-:4_P6906063450663);NM_016081#(-s-s-s-:4_P5255034086391);NM_016081#(-s-s-s…	sp|Q8WX93-3|PALLD_HUMAN	no	no	2,3	5.1381e-22	97.57	49352000
AAFQSLLDAQADEAVLDHPDLK	R	22	0	2366.18	sp|Q9UBI1|COMD3_HUMAN;NM_012071#(f-:10_C5381429466625);NM_012071#(-t:10_C8257946906082);NM_012071#(r:10_C2967152982725);NM_012071#(-s-:10_C2140295268965);tr|H0Y6Z9|H0Y6Z9_HUMAN;NM_012071#(-s-s-:10_C5304456317840);NM_012071#(-s-:10_C3893735391390);NM_012071#(r:10_C7483545811690);tr|H0Y4W0|H0Y4W0_HUMAN	sp|Q9UBI1|COMD3_HUMAN	yes	no	2,3,4	6.5586e-102	237.15	361270000
AAFQYGIK	K	8	0	896.476	sp|Q13123|RED_HUMAN;NM_006083#(-s-s-:5_I714820623550);NM_006083#(-s-:5_I2291565706883);NM_006083#(-s-s-:5_I9690317327998);NM_006083#(f-:5_I8279477429349);NM_006083#(-s-:5_I7189145332928);NM_006083#(-s-s-:5_I720938418837)	sp|Q13123|RED_HUMAN	yes	no	2	0.01346	65.252	54781000
AAFTAFEEAQLPR	R	13	0	1449.73	NM_138442#(-t:19_C3219298690226);sp|Q96CT7|CC124_HUMAN	NM_138442#(-t:19_C3219298690226)	yes	no	2,3	3.7514e-36	244.95	1156400000
AAFTVSLDPGPLEQFPHSMEPQLR	K	24	0	2666.32	sp|Q9UKD2|MRT4_HUMAN;NM_016183#(f-:1_M6848895392842);NM_016183#(-s-:1_M5629291141543)	sp|Q9UKD2|MRT4_HUMAN	yes	no	2,3,4	1.5523e-85	177.03	589310000
AAFVAYALAFPR	R	12	0	1295.7	NM_145201#(-s-:8_N8192615253974);sp|Q6XQN6|PNCB_HUMAN;tr|C9JC60|C9JC60_HUMAN;sp|Q6XQN6-2|PNCB_HUMAN;tr|G5E977|G5E977_HUMAN;sp|Q6XQN6-3|PNCB_HUMAN;NM_145201#(r:8_N8618188072246);tr|C9J8U2|C9J8U2_HUMAN;NM_145201#(rr:8_N2593612107650);NM_145201#(-s-:8_N7921170668656);NM_145201#(-t:8_N3394309468218);NM_145201#(f-:8_N928212644748)	sp|Q6XQN6|PNCB_HUMAN	no	no	2	0.00037829	62.466	1461600
AAFVLPEFAR	R	10	0	1119.61	sp|P19623|SPEE_HUMAN;NM_003132#(f-T:1_S3005101296144);tr|K7EL89|K7EL89_HUMAN	sp|P19623|SPEE_HUMAN	yes	no	2	3.2053e-07	129.85	2222000000
AAFVLPEFARK	R	11	1	1247.7	sp|P19623|SPEE_HUMAN;NM_003132#(f-T:1_S3005101296144);tr|K7EL89|K7EL89_HUMAN	sp|P19623|SPEE_HUMAN	yes	no	3	0.012261	45.307	611890
AAFVSEQQQK	R	10	0	1134.57	NM_002204#(-s-:17_I5730608074131);NM_005501#(-s-:17_I5730608074131);NM_002204#(-s-:17_I5076936311464);NM_002204#(-s-s-:17_I6169692240627);NM_002204#(r:17_I1416686052069);sp|P26006|ITA3_HUMAN;NM_005501#(r:17_I1416686052069);NM_005501#(-t:17_I8509819294310);sp|P26006-1|ITA3_HUMAN;NM_002204#(-s-s-:17_I5140591089943);NM_002204#(r:17_I4719999673731);NM_005501#(-s-s-:17_I5140591089943);NM_002204#(-s-s-…	NM_002204#(-s-:17_I5730608074131)	no	no	2	2.5448e-08	153.05	237090000
AAFYHQPWAQEAVGR	R	15	0	1729.83	sp|Q92925-3|SMRD2_HUMAN;tr|J3KMX2|J3KMX2_HUMAN;sp|Q92925|SMRD2_HUMAN;NM_001098426#(-s-:17_S9131594059182);NM_003077#(-s-:17_S1336641487652);NM_001098426#(-s-:17_S1336641487652);sp|Q92925-2|SMRD2_HUMAN;NM_003077#(r:17_S2596335510141);NM_001098426#(r:17_S2596335510141);tr|J3QWB6|J3QWB6_HUMAN	sp|Q92925-3|SMRD2_HUMAN	yes	no	3	1.5333e-12	101.61	241280000
AAGAAEAAVAAVEEVGSAGQFEELLR	M	26	0	2515.26	sp|O76003|GLRX3_HUMAN;NM_006541#(f-:10_G6025595472984);NM_006541#(-t-f-:10_G923770145481);NM_006541#(-s-:10_G7237811537277);NM_006541#(f-:10_G2076534481944);NM_006541#(f-:10_G4017350038421);NM_006541#(f-:10_G7894482378805);NM_006541#(-t:10_G8464980224570);NM_006541#(-t-e-e-f-:10_G5141787171337);NM_006541#(-t:10_G5528621360102);NM_006541#(f-T:10_G2481613784931)	sp|O76003|GLRX3_HUMAN	yes	no	2,3	7.7302e-41	139.04	7843200
AAGAAGAAAAAAR	R	13	0	998.526	sp|A6NCS6|CB072_HUMAN	sp|A6NCS6|CB072_HUMAN	yes	yes	2	0.0017329	67.061	9126000
AAGAAIAGQASLPVLPGVDR	R	20	0	1833.01	sp|Q9HBE1-3|PATZ1_HUMAN;sp|Q9HBE1|PATZ1_HUMAN;sp|Q9HBE1-4|PATZ1_HUMAN;sp|Q9HBE1-2|PATZ1_HUMAN	sp|Q9HBE1-3|PATZ1_HUMAN	yes	no	3	9.875e-05	52.814	12428000
AAGAALR	R	7	0	628.366	sp|Q13395|TARB1_HUMAN;NM_005646#(-s-:1_T4015063700416);NM_005646#(-s-:1_T6718507771881)	sp|Q13395|TARB1_HUMAN	no	no	2	0.025094	80.377	59022000
AAGAEGAEPAAPR	K	13	0	1166.57	sp|Q9P206-2|K1522_HUMAN	sp|Q9P206-2|K1522_HUMAN	yes	yes	2	0.00084728	61.423	2925800
AAGAEPDSILKPELLSAIEK	K	20	1	2051.11	sp|Q9BZV1|UBXN6_HUMAN;sp|Q9BZV1-2|UBXN6_HUMAN;NM_025241#(-s-s-:19_U2164771060861);tr|K7EP32|K7EP32_HUMAN;NM_025241#(-s-s-s-:19_U213621594838);NM_025241#(-s-s-:19_U5713401933219);NM_025241#(-s-:19_U5925653251541);NM_025241#(-s-s-s-s-:19_U9635950777700);NM_025241#(-s-s-s-:19_U933944958415);NM_025241#(-s-s-s-s-s-:19_U4618585457709);NM_025241#(-s-s-s-s-:19_U6208380126489);NM_025241#(-s-s-s-s-s-s-:19_…	sp|Q9BZV1|UBXN6_HUMAN	yes	no	3	7.7861e-25	132.14	472790000
AAGALLNGPPQFSTAPEIK	K	19	0	1881	NM_014516#(f-T:19_C9426186431102);sp|O75175|CNOT3_HUMAN;NM_014516#(-t:19_C628490282841);NM_014516#(-s-s-s-:19_C3764413088437);NM_014516#(-s-s-s-s-:19_C5587138795078);NM_014516#(-s-s-:19_C960832429523);NM_014516#(-s-s-s-:19_C2312802452007);sp|O75175-2|CNOT3_HUMAN;NM_014516#(-s-:19_C1007417214608);NM_014516#(-s-:19_C1122632653416);NM_014516#(-s-s-:19_C2261756936787);NM_014516#(f-:19_C1842055146607)…	NM_014516#(f-T:19_C9426186431102)	yes	no	2,3	8.7512e-27	119.62	508300000
AAGARPLTSPESLSR	K	15	1	1511.81	NM_080703#(-s-s-s-s-s-:6_B5598402483294);NM_004639#(-s-s-s-s-s-:6_B5598402483294);NM_080703#(-s-s-s-:6_B8273891394840);NM_004639#(-s-s-s-:6_B8273891394840);NM_080703#(-s-s-:6_B9612032834550);NM_004639#(-s-s-:6_B9612032834550);NM_080703#(-s-s-s-:6_B9409600835610);NM_004639#(-s-s-s-:6_B9409600835610);NM_080703#(-s-s-:6_B5767041750880);NM_004639#(-s-s-:6_B5767041750880);NM_080703#(-s-:6_B85049591654…	NM_080703#(-s-s-s-s-s-:6_B5598402483294)	no	no	3	0.00033538	76.341	13635000
AAGASDVVLYK	K	11	0	1092.58	sp|Q9NSD9|SYFB_HUMAN;NM_005687#(-s-s-:2_F1547700195087);NM_005687#(-s-s-:2_F2764285927658);NM_005687#(-s-:2_F5079600758771);NM_005687#(-t:2_F3010089405332);NM_005687#(-s-s-s-s-:2_F289225705894);NM_005687#(-s-s-:2_F4917414864918);NM_005687#(f-t:2_F3494553037219);NM_005687#(-t:2_F1437337521186);NM_005687#(f-:2_F9480553240265);NM_005687#(-s-:2_F5816599609814);NM_005687#(-s-s-s-s-:2_F9811999365404);N…	sp|Q9NSD9|SYFB_HUMAN	yes	no	2	7.1421e-05	99.283	1491900000
AAGCDFTNVVK	K	11	0	1180.55	sp|P52758|UK114_HUMAN;tr|H0YB34|H0YB34_HUMAN;tr|H0YBX3|H0YBX3_HUMAN;NM_005836#(-s-:8_H6262808604661)	sp|P52758|UK114_HUMAN	yes	no	2	0.00016632	77.062	350730000
AAGCNIPVASVAAGFPAGQTHLK	K	23	0	2236.14	sp|Q9Y315|DEOC_HUMAN;NM_015954#(-t:12_D1441613197855);tr|E9PPM8|E9PPM8_HUMAN;NM_015954#(-s-:12_D9638794519596);tr|G3V158|G3V158_HUMAN;NM_015954#(f-T:12_D4393914192791);NM_015954#(f-:12_D1587725452179);tr|E9PML7|E9PML7_HUMAN;tr|E9PMH9|E9PMH9_HUMAN;NM_015954#(-t:12_D6294707550895);NM_015954#(f-:12_D1992581645243);NM_015954#(f-T:12_D5915394331676);tr|E9PPK3|E9PPK3_HUMAN	sp|Q9Y315|DEOC_HUMAN	yes	no	3	2.0716e-15	95.153	215580000
AAGDTTVIENSDVSPETESSEK	K	22	0	2265.01	NM_001079521#(-s-s-s-:14_K4349133239105);NM_004986#(-s-s-s-:14_K4349133239105);NM_001079521#(-s-s-:14_K9167787760973);NM_004986#(-s-:14_K2142983939511);NM_001079522#(-s-s-:14_K9167787760973)	NM_001079521#(-s-s-:14_K9167787760973)	no	no	2,3	4.0564e-120	257.72	147120000
AAGELGIAVCNIPSAAVEETADSTICHILNLYR	K	33	0	3527.74	NM_001083914#(-s-:10_C8791093004952);sp|P56545|CTBP2_HUMAN;tr|Q5SQP8|Q5SQP8_HUMAN;sp|P56545-2|CTBP2_HUMAN;NM_001083914#(-s-:10_C4308100511966);NM_022802#(-s-:10_C4308100511966);NM_001083914#(-s-:10_C2069002480280)	NM_001083914#(-s-:10_C8791093004952)	yes	no	3,4	1.2762e-89	153.02	34164000
AAGEPIKEGDNDYFTCITK	K	19	1	2127.98	sp|Q99543|DNJC2_HUMAN;sp|Q99543-2|DNJC2_HUMAN;NM_014377#(r:7_D9165673291560);tr|H7C3L7|H7C3L7_HUMAN;tr|C9IZ83|C9IZ83_HUMAN;tr|F2Z3N9|F2Z3N9_HUMAN	sp|Q99543|DNJC2_HUMAN	yes	no	3	6.4879e-56	209.66	364220000
AAGEVLEPANLLAEEK	R	16	0	1652.86	sp|Q9Y5K8|VATD_HUMAN;tr|G3V2S6|G3V2S6_HUMAN;tr|H0YJH8|H0YJH8_HUMAN;tr|G3V2V6|G3V2V6_HUMAN	sp|Q9Y5K8|VATD_HUMAN	yes	no	2	2.6586e-13	95.197	68860000
AAGFDEIEQDLTQR	R	14	0	1591.75	sp|O95786|DDX58_HUMAN;tr|B3KWW1|B3KWW1_HUMAN;sp|O95786-2|DDX58_HUMAN;tr|A2A376|A2A376_HUMAN;tr|F5H5W6|F5H5W6_HUMAN	sp|O95786|DDX58_HUMAN	yes	no	2	1.6767e-09	94.09	24599000
AAGFDEIEQDLTQRFEEK	R	18	1	2125	sp|O95786|DDX58_HUMAN;tr|B3KWW1|B3KWW1_HUMAN;sp|O95786-2|DDX58_HUMAN;tr|A2A376|A2A376_HUMAN;tr|F5H5W6|F5H5W6_HUMAN	sp|O95786|DDX58_HUMAN	yes	no	3	8.1917e-07	62.589	1382500
AAGFERPSPVQLK	R	13	1	1398.76	sp|Q9UHI6|DDX20_HUMAN;tr|B4DWV7|B4DWV7_HUMAN	sp|Q9UHI6|DDX20_HUMAN	yes	no	3	0.00039829	70.089	87424000
AAGFKDPLLASGTDGVGTK	K	19	1	1803.94	sp|P22102|PUR2_HUMAN;NM_000819#(f-T:21_G632839954053);NM_000819#(r:21_G2465940895366);tr|B4DJ93|B4DJ93_HUMAN	sp|P22102|PUR2_HUMAN	yes	no	2,3	5.5053e-30	148.19	1961700000
AAGFPQYAQLYEDSQFPINIVAVK	R	24	0	2668.35	sp|Q9Y3M8-4|STA13_HUMAN;sp|Q9Y3M8-2|STA13_HUMAN;sp|Q9Y3M8|STA13_HUMAN;sp|Q9Y3M8-5|STA13_HUMAN;tr|H3BRG5|H3BRG5_HUMAN	sp|Q9Y3M8-4|STA13_HUMAN	yes	no	3,4	3.0858e-41	119.34	39535000
AAGGAVCEQPLGLECR	R	16	0	1686.78	sp|Q9HC84|MUC5B_HUMAN;tr|E9PBJ0|E9PBJ0_HUMAN	sp|Q9HC84|MUC5B_HUMAN	yes	no	2,3	7.0912e-42	168.5	33994000
AAGGDHGSPDSYR	M	13	0	1288.54	sp|P30566|PUR8_HUMAN;tr|E7ERF4|E7ERF4_HUMAN;sp|P30566-2|PUR8_HUMAN;NM_001123378#(f-:22_A4041774791405);NM_001123378#(f-:22_A7078290825994);NM_001123378#(-t:22_A7265740994635)	sp|P30566|PUR8_HUMAN	yes	no	2	2.1644e-28	244.71	175970000
AAGGDHGSPDSYRSPLASR	M	19	1	1899.88	sp|P30566|PUR8_HUMAN;tr|E7ERF4|E7ERF4_HUMAN;sp|P30566-2|PUR8_HUMAN;NM_001123378#(f-:22_A4041774791405);NM_001123378#(f-:22_A7078290825994);NM_001123378#(-t:22_A7265740994635)	sp|P30566|PUR8_HUMAN	yes	no	3	5.8251e-07	103.9	18210000
AAGGFTHDELLK	R	12	0	1257.64	sp|P56182|RRP1_HUMAN	sp|P56182|RRP1_HUMAN	yes	yes	2,3	1.5358e-06	108.56	1040200000
AAGGGGSCDPLAPAGVPCAFSPHSQAYFALASTDGHLR	M	38	0	3769.74	sp|Q15061|WDR43_HUMAN	sp|Q15061|WDR43_HUMAN	yes	yes	3,4	3.4364e-104	176.22	142070000
AAGGIELFVGGIGPDGHIAFNEPGSSLVSR	K	30	0	2923.48	sp|P46926|GNPI1_HUMAN;tr|E7EVU7|E7EVU7_HUMAN;tr|D6R9P4|D6R9P4_HUMAN;tr|D6RFF8|D6RFF8_HUMAN;tr|D6RAY7|D6RAY7_HUMAN;tr|D6RB13|D6RB13_HUMAN	sp|P46926|GNPI1_HUMAN	yes	no	3,4	4.4315e-94	163.09	373030000
AAGGLHLLPWSR	R	12	0	1276.7	NM_138346#(r:1_K58490279405);sp|Q8IYS2|K2013_HUMAN;sp|Q8IYS2-2|K2013_HUMAN	NM_138346#(r:1_K58490279405)	yes	no	3	0.0045744	42.629	20059000
AAGGLSR	M	7	0	630.345	NM_016538#(f-s-T:17_S2541975185645);NM_016538#(f-:17_S4439931229592);sp|Q9NRC8|SIR7_HUMAN;NM_016538#(r:17_S9574185516767);sp|Q9NRC8-2|SIR7_HUMAN;NM_016538#(r:17_S9644838635518);NM_016538#(f-t:17_S8154904008862);NM_016538#(-t:17_S1494333530335);tr|I3L2A4|I3L2A4_HUMAN;tr|I3L1J8|I3L1J8_HUMAN	NM_016538#(f-s-T:17_S2541975185645)	yes	no	1,2	0.018653	76.847	65864000
AAGGMLELPAPSNR	K	14	0	1382.7	sp|O15021-2|MAST4_HUMAN;sp|O15021-3|MAST4_HUMAN;tr|E7EWQ5|E7EWQ5_HUMAN;sp|O15021-1|MAST4_HUMAN;tr|J3QT34|J3QT34_HUMAN;tr|F8WAQ9|F8WAQ9_HUMAN;sp|O15021|MAST4_HUMAN;tr|H7C1I9|H7C1I9_HUMAN	sp|O15021-2|MAST4_HUMAN	yes	no	2	0.00011735	66.215	229260000
AAGGPGAGSAAPVSSTSSLPLAALNMR	M	27	0	2410.23	sp|Q99836|MYD88_HUMAN;tr|J3KPU4|J3KPU4_HUMAN;tr|H0Y4G9|H0Y4G9_HUMAN;tr|J3KQJ6|J3KQJ6_HUMAN;sp|Q99836-2|MYD88_HUMAN;tr|J3KQ87|J3KQ87_HUMAN;NM_002468#(f-:3_M2235952479643);sp|Q99836-3|MYD88_HUMAN;sp|Q99836-4|MYD88_HUMAN	sp|Q99836|MYD88_HUMAN	yes	no	2,3	4.9425e-15	101.41	24530000
AAGHPGDPESQQR	K	13	0	1348.61	NM_006289#(-s-s-:9_T5448982096712);NM_006289#(-s-s-s-:9_T6529221633583);NM_006289#(-s-s-s-s-s-s-:9_T9877463915433);NM_006289#(-s-s-s-s-s-:9_T6437789503476);NM_006289#(-s-s-s-s-s-:9_T8209657931625);NM_006289#(-s-s-s-s-s-:9_T8034355452369);NM_006289#(-s-s-s-s-:9_T3658876082806);NM_006289#(-s-s-s-s-s-s-s-s-s-:9_T936014498235);NM_006289#(-s-s-s-s-s-s-s-s-:9_T9102193833970);NM_006289#(-s-s-s-s-s-s-s-s…	NM_006289#(-s-s-s-:9_T1596020102767)	no	no	2,3	1.0351e-17	188.15	104260000
AAGIASETEIAFFCEEDYKNYK	K	22	1	2555.15	sp|Q3KRA6|CB076_HUMAN;NM_001017927#(-s-:2_C7543440534189)	sp|Q3KRA6|CB076_HUMAN	yes	no	3	0.032249	35.538	395180
AAGIDEQENWHEGK	K	14	0	1582.7	sp|P28838-2|AMPL_HUMAN;sp|P28838|AMPL_HUMAN;NM_015907#(-s-:4_L4463849076859)	sp|P28838-2|AMPL_HUMAN	yes	no	2,3,4	7.5152e-56	180.61	2804400000
AAGIDEQENWHEGKENIR	K	18	1	2094.97	sp|P28838-2|AMPL_HUMAN;sp|P28838|AMPL_HUMAN;NM_015907#(-s-:4_L4463849076859)	sp|P28838-2|AMPL_HUMAN	yes	no	3,4	4.4228e-30	141.13	210970000
AAGIDPSVIGPQVLLAHLAR	R	20	0	1997.14	sp|Q7Z449|CP2U1_HUMAN;sp|Q7Z449-2|CP2U1_HUMAN	sp|Q7Z449|CP2U1_HUMAN	yes	no	3	3.3469e-05	54.964	2197700
AAGIEIQK	R	8	0	828.471	sp|Q99459|CDC5L_HUMAN	sp|Q99459|CDC5L_HUMAN	yes	yes	2	0.0058366	82.452	56961000
AAGIIHLGATSCYVGDNTDLIILR	K	24	0	2542.32	sp|P30566|PUR8_HUMAN;sp|P30566-2|PUR8_HUMAN;NM_001123378#(f-:22_A4041774791405);NM_001123378#(f-:22_A7078290825994);NM_001123378#(-t:22_A7265740994635)	sp|P30566|PUR8_HUMAN	yes	no	3	4.8062e-54	141.93	62806000
AAGKELTVDNSFEFEK	K	16	1	1783.86	NM_016304#(-t:15_C9298800040818);sp|Q9UHA3|RLP24_HUMAN;NM_016304#(f-T:15_C1012829844114);NM_016304#(f-:15_C6155157688860);tr|H3BMQ2|H3BMQ2_HUMAN	NM_016304#(-t:15_C9298800040818)	yes	no	3	3.2283e-20	141.55	1730900
AAGKELTVDNSFEFEKR	K	17	2	1939.96	NM_016304#(-t:15_C9298800040818);sp|Q9UHA3|RLP24_HUMAN;NM_016304#(f-T:15_C1012829844114);NM_016304#(f-:15_C6155157688860);tr|H3BMQ2|H3BMQ2_HUMAN	NM_016304#(-t:15_C9298800040818)	yes	no	4	3.0128e-38	183.77	5674900
AAGKGDVPTK	K	10	1	942.513	sp|P62424|RL7A_HUMAN;NM_000972#(f-:9_R4671903629511);NM_000972#(f-:9_R2518286824260);NM_000972#(f-:9_R4578208125572);NM_000972#(f-T:9_R7157240321176);NM_000972#(-t:9_R7176795396459);NM_000972#(-t:9_R5139038494840);NM_000972#(f-:9_R9182192440884);NM_000972#(-t:9_R4545852019842);NM_000972#(-s-:9_R9714180655617);NM_000972#(-t:9_R7195857792500);NM_000972#(r:9_R3477051778215);NM_000972#(f-T:9_R1586196…	sp|P62424|RL7A_HUMAN	yes	no	3	4.5276e-05	119.27	52039000
AAGLAGSDLITALISPTTR	R	19	0	1827.01	tr|C9J4K5|C9J4K5_HUMAN;tr|F8W8A5|F8W8A5_HUMAN;sp|Q9NYP3|DONS_HUMAN;tr|C9JSP0|C9JSP0_HUMAN;tr|H7C1C1|H7C1C1_HUMAN	tr|C9J4K5|C9J4K5_HUMAN	yes	no	2,3	1.3451e-19	107.98	8769200
AAGLATMISTMRPDIDNMDEYVR	K	23	1	2569.2	sp|O75533|SF3B1_HUMAN;NM_012433#(-s-:2_S6826934827955);NM_012433#(-s-:2_S3608745864216);NM_012433#(-s-s-:2_S2356212416052);NM_012433#(-s-:2_S8100812357730);NM_012433#(-s-:2_S6087036609353);NM_012433#(-s-s-:2_S4504869669907);NM_012433#(-s-:2_S7095954234281);NM_012433#(-s-s-s-:2_S5625660433953);NM_012433#(-s-s-:2_S6070260272878);NM_012433#(-s-:2_S2629863027456);NM_012433#(-s-:2_S9598626584907);NM_0…	sp|O75533|SF3B1_HUMAN	no	no	2,3,4	5.2929e-54	161.51	700300000
AAGLEDKIELLK	K	12	1	1298.74	sp|Q9BTF0|THUM2_HUMAN	sp|Q9BTF0|THUM2_HUMAN	yes	yes	3	0.063724	38.3	16260000
AAGLEPVGHYEEVELTETSVNVGPER	R	26	0	2781.35	NM_003952#(-s-:11_R243130130624);NM_003952#(f-:11_R5341275995878);sp|Q9UBS0|KS6B2_HUMAN;NM_003952#(-t:11_R9099915708692);NM_003952#(r:11_R1634750697806);NM_003952#(f-:11_R2646804415898);NM_003952#(r:11_R6893163794341);NM_003952#(-s-:11_R8324939229084);tr|E9PQF6|E9PQF6_HUMAN;tr|G3V2F1|G3V2F1_HUMAN;tr|B4DML8|B4DML8_HUMAN;tr|E9PKK1|E9PKK1_HUMAN	NM_003952#(-s-:11_R243130130624)	yes	no	3,4	2.1846e-110	209.41	26304000
AAGLGELGAALLQLVR	R	16	0	1550.91	sp|P11474|ERR1_HUMAN;sp|P11474-2|ERR1_HUMAN;NM_004451#(-s-:11_E5973363228667);tr|H0YGT3|H0YGT3_HUMAN;NM_004451#(f-:11_E7650352115678)	sp|P11474|ERR1_HUMAN	yes	no	2	0.00016149	60.55	2834200
AAGLVSDLDADSGLTLSR	R	18	0	1759.9	sp|Q9BW92|SYTM_HUMAN;NM_025150#(-t:1_T9262546407100);NM_025150#(-s-s-:1_T9263278435497);NM_025150#(-s-:1_T1350021904409);NM_025150#(-s-:1_T2639429079277);NM_025150#(-s-:1_T3201522659125);NM_025150#(-s-s-s-:1_T2374656086489);NM_025150#(-s-s-:1_T5356171051946);NM_025150#(-s-:1_T5529156689282);NM_025150#(-s-s-s-s-s-:1_T5481241069691);NM_025150#(-s-s-s-s-:1_T1011908678950);NM_025150#(-s-s-s-s-:1_T953…	sp|Q9BW92|SYTM_HUMAN	no	no	2,3	1.8117e-42	152.94	72504000
AAGMNMEEEEELQQNLWGLK	K	20	0	2319.05	sp|Q13144|EI2BE_HUMAN;tr|E9PC74|E9PC74_HUMAN;NM_003907#(r:3_E2385515095549);NM_003907#(-s-:3_E298125222585);NM_003907#(r:3_E5285642483485);NM_003907#(-s-:3_E9576806455809);NM_003907#(r:3_E5325147857059);NM_003907#(r:3_E709543001948)	sp|Q13144|EI2BE_HUMAN	yes	no	3	9.257e-06	50.178	22043000
AAGMSSPGAQSHPEELPR	K	18	0	1820.85	NM_004145#(-t:19_M6908661243054);NM_001130065#(-t:19_M6908661243054);NM_001130065#(f-:19_M8240265656999);sp|Q13459-2|MYO9B_HUMAN;NM_001130065#(f-T:19_M2517376957438);NM_004145#(f-:19_M2534676584868);NM_001130065#(f-:19_M2534676584868);NM_004145#(f-:19_M8240265656999);tr|M0R0P8|M0R0P8_HUMAN;sp|Q13459|MYO9B_HUMAN;NM_004145#(f-T:19_M2517376957438);NM_001130065#(f-:19_M404559595556);NM_001130065#(-s-…	NM_004145#(-t:19_M6908661243054)	yes	no	3	4.6745e-26	116.06	13929000
AAGNESFR	R	8	0	850.393	sp|Q15785|TOM34_HUMAN;NM_006809#(-t:20_T9350100601663);NM_006809#(f-:20_T3111043249018);NM_006809#(f-T:20_T4237290837219);NM_006809#(f-T:20_T4034581514081);NM_006809#(-t:20_T5765263587820)	sp|Q15785|TOM34_HUMAN	yes	no	2	0.035856	91.064	2788100
AAGNPGSLAAPIDHKPCSAPLEPK	R	24	1	2397.21	sp|Q14676|MDC1_HUMAN;NM_014641#(-s-:6_M3763810950038);tr|E9PGY5|E9PGY5_HUMAN;sp|Q14676-2|MDC1_HUMAN;tr|E7EVA7|E7EVA7_HUMAN;sp|Q14676-3|MDC1_HUMAN;NM_014641#(r:6_M1727986276489);tr|F8VV34|F8VV34_HUMAN;tr|F8W1C2|F8W1C2_HUMAN;tr|F8VZP8|F8VZP8_HUMAN;tr|F8VU38|F8VU38_HUMAN;NM_014641#(r:6_M1766021592626)	sp|Q14676|MDC1_HUMAN	yes	no	4	1.384e-41	150.36	33867000
AAGPELQADCDQIVKR	K	16	1	1769.87	NM_017554#(-t:3_P6909794928245);sp|Q460N5|PAR14_HUMAN;sp|Q460N5-4|PAR14_HUMAN;NM_017554#(-s-:3_P7426575902165);NM_017554#(-s-:3_P3482858556082);sp|Q460N5-1|PAR14_HUMAN;sp|Q460N5-3|PAR14_HUMAN;tr|H7C5R8|H7C5R8_HUMAN	NM_017554#(-t:3_P6909794928245)	yes	no	3	3.1424e-14	106.82	7761500
AAGPGLGNVAMGPR	R	14	0	1266.65	sp|O14497|ARI1A_HUMAN;sp|O14497-2|ARI1A_HUMAN;sp|O14497-3|ARI1A_HUMAN;NM_006015#(r:1_A398815975533);NM_139135#(r:1_A398815975533);tr|H0Y488|H0Y488_HUMAN;tr|H0YCU6|H0YCU6_HUMAN	sp|O14497|ARI1A_HUMAN	yes	no	2	0.030675	44.426	1982900
AAGPGWAAYER	R	11	0	1147.54	sp|Q86VI3|IQGA3_HUMAN	sp|Q86VI3|IQGA3_HUMAN	yes	yes	2	0.014126	46.88	23557000
AAGPISER	M	8	0	799.419	sp|Q15427|SF3B4_HUMAN	sp|Q15427|SF3B4_HUMAN	yes	yes	2	0.0030859	91.783	303090000
AAGPLLTDECR	R	11	0	1201.58	sp|Q9BQ69|MACD1_HUMAN;NM_014067#(-s-:11_M2707751985851);NM_014067#(r:11_M3011839772243);NM_014067#(r:11_M2168000118827);NM_014067#(r:11_M516630132918);NM_014067#(-s-:11_M4320160769025)	sp|Q9BQ69|MACD1_HUMAN	yes	no	2	2.4661e-09	136.49	274920000
AAGPLQLR	R	8	0	824.487	sp|P20618|PSB1_HUMAN;NM_002793#(-s-:6_P7636131981747);NM_002793#(-s-:6_P7297323852312)	sp|P20618|PSB1_HUMAN	yes	no	2	0.0042938	86.472	57744000
AAGPSLSHTSGGTQSK	K	16	0	1484.72	NM_002945#(-t:17_R3116870649185);sp|P27694|RFA1_HUMAN;NM_002945#(f-:17_R4508463284466);NM_002945#(f-e-e-e-t:17_R1990646985742);NM_002945#(f-:17_R4400810574562);NM_002945#(f-:17_R1157062919861)	NM_002945#(-t:17_R3116870649185)	yes	no	2,3	3.7329e-42	192.78	739150000
AAGSDGTELFDQVHR	R	15	0	1601.74	NM_016230#(-s-:6_C1480669701261);sp|Q7L1T6|NB5R4_HUMAN;NM_016230#(-s-:6_C3368600086721)	NM_016230#(-s-:6_C1480669701261)	yes	no	3	0.00048253	46.41	19634000
AAGSGELGVTMK	K	12	0	1119.56	sp|O75369-8|FLNB_HUMAN;sp|O75369-3|FLNB_HUMAN;NM_001457#(-s-:3_F4863507839644);sp|O75369-6|FLNB_HUMAN	sp|O75369-8|FLNB_HUMAN	no	no	2	7.0455e-10	131.17	2515900000
AAGSGELGVTMKGPK	K	15	1	1401.73	sp|O75369-8|FLNB_HUMAN;sp|O75369-3|FLNB_HUMAN;NM_001457#(-s-:3_F4863507839644);sp|O75369-6|FLNB_HUMAN	sp|O75369-8|FLNB_HUMAN	no	no	3	9.098e-09	106.14	19704000
AAGSPHLTLEFCNYPSSMR	R	19	0	2136.97	sp|Q96GM8|TOE1_HUMAN;NM_025077#(r:1_T227925540115);tr|B4DEM6|B4DEM6_HUMAN;NM_025077#(r:1_T218081864532)	sp|Q96GM8|TOE1_HUMAN	yes	no	3	1.5685e-43	146.81	175780000
AAGSPSPLPAPDPAPK	R	16	0	1471.77	NM_024083#(-t:17_A4511955500435);NM_024083#(-t:17_A5984745770921);sp|Q9BZE9|ASPC1_HUMAN;sp|Q9BZE9-2|ASPC1_HUMAN;NM_024083#(-s-s-:17_A4265297757960);NM_024083#(-s-s-:17_A3843975208668);NM_024083#(-s-:17_A7994604691293);sp|Q9BZE9-3|ASPC1_HUMAN;NM_024083#(-s-:17_A9004986067732);tr|J3KRY8|J3KRY8_HUMAN;NM_024083#(-s-:17_A6749868162426);tr|J3KRF7|J3KRF7_HUMAN	NM_024083#(-t:17_A4511955500435)	yes	no	2	7.0931e-17	112.1	152750000
AAGSPSSSDQDEKLPGQDESTAGTSEQNDILK	K	32	1	3261.48	sp|Q9Y520-4|PRC2C_HUMAN;tr|E7EPN9|E7EPN9_HUMAN;sp|Q9Y520-5|PRC2C_HUMAN;sp|Q9Y520|PRC2C_HUMAN;sp|Q9Y520-7|PRC2C_HUMAN;sp|Q9Y520-6|PRC2C_HUMAN;sp|Q9Y520-3|PRC2C_HUMAN;NM_015172#(-t:1_B2230793219303);NM_015172#(-s-e-S-:1_B1615709284290);NM_015172#(-s-:1_B6407354570096);NM_015172#(f-T:1_B3313824677802);NM_015172#(f-:1_B4386024303127)	sp|Q9Y520-4|PRC2C_HUMAN	yes	no	3,4	3.0681e-170	251.13	54907000
AAGTAAALAFLSQESR	M	16	0	1562.81	sp|O75607|NPM3_HUMAN	sp|O75607|NPM3_HUMAN	yes	yes	1,2	1.3043e-56	254.18	1144900000
AAGTAGQLLYSNLQHLK	R	17	0	1783.96	NM_012153#(-s-:11_E5754354148125);sp|Q9NZC4-2|EHF_HUMAN;NM_012153#(-t:11_E5107274739839);sp|Q9NZC4|EHF_HUMAN;tr|E9PSB2|E9PSB2_HUMAN;NM_012153#(-s-s-:11_E8345632865808);NM_012153#(-s-:11_E9354632916262);tr|E9PQX0|E9PQX0_HUMAN;tr|E9PN75|E9PN75_HUMAN;tr|E9PQR6|E9PQR6_HUMAN;tr|E9PPS9|E9PPS9_HUMAN	NM_012153#(-s-:11_E5754354148125)	yes	no	3	0.0044075	43.794	28771000
AAGTCGVLLR	R	10	0	1016.54	sp|Q5T653|RM02_HUMAN;NM_015950#(f-T:6_M3346500107595);NM_015950#(-s-:6_M9957176503275);NM_015950#(-s-s-:6_M100132136339)	sp|Q5T653|RM02_HUMAN	yes	no	2	7.5896e-06	120.99	172780000
AAGTDGSDFQHR	R	12	0	1260.55	sp|Q8N5M9|JAGN1_HUMAN	sp|Q8N5M9|JAGN1_HUMAN	yes	yes	2,3	8.2614e-16	176.42	234360000
AAGTEGPFQEVDGVATTR	R	18	0	1804.86	NM_130440#(-s-:1_P386495974651);NM_002840#(-s-:1_P386495974651);sp|P10586-2|PTPRF_HUMAN;sp|P10586|PTPRF_HUMAN;NM_130440#(-s-:1_P7028072940705);NM_002840#(-s-:1_P7028072940705);NM_130440#(f-:1_P1195206266540);NM_002840#(f-:1_P1195206266540);NM_130440#(-t:1_P29246310668);NM_002840#(-t:1_P29246310668);NM_130440#(-s-:1_P1746140085334);NM_002840#(-s-:1_P1746140085334);NM_130440#(f-t:1_P93197267615);NM…	NM_130440#(-s-:1_P386495974651)	yes	no	2	2.3918e-08	75.143	20074000
AAGTLYTYPENWR	M	13	0	1540.73	sp|P26641|EF1G_HUMAN;NM_001404#(-t:11_E6488192714967);NM_001404#(-t:11_E6819426743709);NM_001404#(-s-s-:11_E8104795111009);NM_001404#(r:11_E8203396060030);NM_001404#(-t:11_E4403876636405);NM_001404#(-t:11_E1650192596767);NM_001404#(-t:11_E3596785655736);NM_001404#(-t:11_E7704476094133);NM_001404#(f-T:11_E8418978989064);NM_001404#(r:11_E5869460053489);NM_001404#(-s-:11_E9671756522277);NM_001404#(f…	sp|P26641|EF1G_HUMAN	yes	no	2,3	1.3655e-19	213.63	4685400000
AAGTSSYWEDLRK	M	13	1	1482.71	tr|E9PCW1|E9PCW1_HUMAN;sp|O95249|GOSR1_HUMAN;NM_001007025#(-s-:17_G9618196552251);NM_004871#(-s-:17_G9618196552251);NM_001007025#(f-:17_G653957753699);NM_004871#(f-:17_G653957753699);tr|B4DQA8|B4DQA8_HUMAN;tr|K7EJC8|K7EJC8_HUMAN;tr|F6RU00|F6RU00_HUMAN	tr|E9PCW1|E9PCW1_HUMAN	yes	no	2	4.097e-20	228.74	454100000
AAGVDCGDGVGAR	M	13	0	1203.53	NM_024570#(-t:13_R7482655034297);sp|Q5TBB1|RNH2B_HUMAN;tr|G3XAJ1|G3XAJ1_HUMAN;NM_024570#(f-:13_R8144786464623);NM_024570#(f-T:13_R2516227198621);NM_024570#(f-:13_R2691547112435)	NM_024570#(-t:13_R7482655034297)	yes	no	2	0.0073106	56.139	3578400
AAGVEAAAEVAATEIK	M	16	0	1499.78	tr|M0R019|M0R019_HUMAN	tr|M0R019|M0R019_HUMAN	no	no	2,3	8.8833e-24	147.1	2101500000
AAGVLEGALGPHVVTNLYLYPIK	K	23	0	2394.33	sp|Q96EN8|MOCOS_HUMAN	sp|Q96EN8|MOCOS_HUMAN	yes	yes	3	2.7155e-22	102.45	47080000
AAGVNVEPFWPGLFAK	K	16	0	1701.89	NM_213725#(-s-:15_R1708454340193);sp|P05386|RLA1_HUMAN;NM_001003#(f-:15_R5183376975934);NM_001003#(f-T:15_R1601416316559);NM_001003#(-t:15_R6449334098770);NM_001003#(-s-:15_R4563011253893);NM_001003#(f-t:15_R3994562475122);NM_001003#(-t:15_R9135670449889);NM_001003#(-t:15_R1333166170267);NM_001003#(r:15_R8370867170476);NM_001003#(f-:15_R265746734044)	NM_213725#(-s-:15_R1708454340193)	yes	no	2,3,4	5.414e-30	143.58	24234000000
AAGVVLEMIR	R	10	0	1057.6	sp|Q9Y230|RUVB2_HUMAN;NM_006666#(f-:19_R3341684475536);NM_006666#(-t:19_R1376068241204);NM_006666#(f-:19_R5066115164576);tr|B3KQ59|B3KQ59_HUMAN;NM_006666#(-s-s-:19_R1910982325536);NM_006666#(-s-:19_R2490236811393);NM_006666#(-s-s-:19_R8680043588640);NM_006666#(-s-s-:19_R9137811018839);NM_006666#(-s-s-:19_R7401769337228);NM_006666#(-s-s-s-s-:19_R825135739505);NM_006666#(-s-s-s-s-:19_R988824930328)…	sp|Q9Y230|RUVB2_HUMAN	yes	no	2	1.4237e-07	155.42	1631800000
AAGWAGSPPTLLPLSPTSPR	R	20	0	1975.05	sp|B0YJ81|HACD1_HUMAN;sp|B0YJ81-2|HACD1_HUMAN;tr|A6NP58|A6NP58_HUMAN	sp|B0YJ81|HACD1_HUMAN	yes	no	2	4.3076e-17	103.71	32133000
AAGWSELSER	K	10	0	1104.52	tr|H0YA52|H0YA52_HUMAN;sp|Q9H0N5|PHS2_HUMAN;NM_032151#(-s-:5_P6692357757825)	tr|H0YA52|H0YA52_HUMAN	yes	no	2	2.9982e-07	130.98	121540000
AAGYDLYSAYDYTIPPMEK	R	19	0	2166.98	sp|P33316-2|DUT_HUMAN;tr|H0YNW5|H0YNW5_HUMAN;NM_001025248#(f-:15_D1421016023109);NM_001948#(-t:15_D3728344782170);NM_001948#(f-:15_D3953211972551);NM_001948#(-t:15_D2857645533709);NM_001948#(f-T:15_D2276813178683);tr|H0YNJ9|H0YNJ9_HUMAN;tr|H0YKC5|H0YKC5_HUMAN;tr|H0Y477|H0Y477_HUMAN;tr|H0YMM5|H0YMM5_HUMAN;NM_001025249#(-t:15_D3728344782170);NM_001025249#(f-:15_D3953211972551);NM_001025249#(-t:15_D…	sp|P33316-2|DUT_HUMAN	no	no	2,3	0.0057954	30.945	56112000
AAGYNFYGTER	K	11	0	1247.56	sp|Q9H9Y6|RPA2_HUMAN;tr|F5GZX4|F5GZX4_HUMAN;sp|Q9H9Y6-2|RPA2_HUMAN;tr|F5H643|F5H643_HUMAN;tr|F8W898|F8W898_HUMAN	sp|Q9H9Y6|RPA2_HUMAN	yes	no	2	4.5688e-06	112.93	63488000
AAGYPPFFADQPIQIYEK	M	18	0	2054.01	NM_182948#(-s-s-s-:1_P3831742798867);NM_182948#(-s-s-s-s-s-s-:1_P5707822695333)	NM_182948#(-s-s-s-:1_P3831742798867)	yes	yes	2	1.1077e-08	75.548	14188000
AAHAALEEEYLK	K	12	0	1343.67	NM_030767#(-s-:9_A2470379456923);sp|Q7Z591|AKNA_HUMAN;sp|Q7Z591-3|AKNA_HUMAN;sp|Q7Z591-7|AKNA_HUMAN;sp|Q7Z591-2|AKNA_HUMAN;sp|Q7Z591-8|AKNA_HUMAN	NM_030767#(-s-:9_A2470379456923)	yes	no	2,3	2.668e-06	103.08	42289000
AAHACATVGNR	R	11	0	1126.53	NM_014315#(-s-:14_K9898031467176)	NM_014315#(-s-:14_K9898031467176)	no	no	3	0.001227	55.314	3118100
AAHDNMDIDK	K	10	0	1128.49	sp|Q9H444|CHM4B_HUMAN;NM_176812#(-t:20_C310741138993);NM_176812#(f-t:20_C6794386241470);NM_176812#(f-:20_C8782925209286);sp|P59074|CG301_HUMAN	sp|Q9H444|CHM4B_HUMAN	no	no	2,3	3.0218e-06	167.11	99558000
AAHEALGQFCCALHK	K	15	0	1711.79	NM_024658#(-s-s-:14_I6563760133714);NM_024658#(-s-:14_I6621892743191);NM_024658#(-s-:14_I156026837679);sp|Q8TEX9|IPO4_HUMAN;sp|Q8TEX9-2|IPO4_HUMAN;NM_024658#(r:14_I8796880739781);NM_024658#(r:14_I2903236173688);NM_024658#(-s-:14_I5823137739086);NM_024658#(-s-:14_I8254174839133);NM_024658#(-s-:14_I7211794712241);NM_024658#(-s-:14_I6094728752385);NM_024658#(r:14_I6053843548309);NM_024658#(-s-s-:14_…	NM_024658#(-s-s-:14_I6563760133714)	no	no	3,4	8.1626e-09	76.759	145320000
AAHEASSLYSEEK	M	13	0	1420.65	NM_015466#(r:3_P400061306455)	NM_015466#(r:3_P400061306455)	yes	yes	2,3	3.0626e-17	187.11	46409000
AAHEWDWFQR	M	10	0	1344.6	sp|Q96JQ2|CLMN_HUMAN;tr|G3V3D8|G3V3D8_HUMAN	sp|Q96JQ2|CLMN_HUMAN	yes	no	2	0.00016586	94.692	6315200
AAHFDIDWGK	K	10	0	1158.55	NM_001270#(-s-:5_C4150311023964);sp|O14646-2|CHD1_HUMAN;sp|O14646|CHD1_HUMAN;NM_001270#(-s-:5_C143530724370)	NM_001270#(-s-:5_C4150311023964)	no	no	2,3	1.1794e-08	174.41	122510000
AAHFFSTLK	K	9	0	1020.54	sp|Q53H12|AGK_HUMAN;NM_018238#(f-T:7_A3595391735288);tr|E9PC15|E9PC15_HUMAN;NM_018238#(f-:7_A7943364333567);NM_018238#(-t:7_A4610911553321);NM_018238#(-t:7_A6777537781124);NM_018238#(-s-:7_A5849237755104);tr|E9PG39|E9PG39_HUMAN	sp|Q53H12|AGK_HUMAN	yes	no	2,3	0.00019957	111.46	338820000
AAHGFDWEEER	K	11	0	1345.57	NM_014865#(-s-:12_N4196747347463);sp|Q15021|CND1_HUMAN;NM_014865#(-s-s-s-:12_N8582438175124);NM_014865#(-s-s-:12_N214569444940);NM_014865#(-s-:12_N1255324698513);NM_014865#(-s-s-s-:12_N2463787170549);NM_014865#(-s-s-:12_N3377332648639);NM_014865#(-s-:12_N7712820300541);NM_014865#(-s-s-:12_N3830000889024);NM_014865#(-s-s-:12_N1184820821481);NM_014865#(-s-:12_N2531303334163);NM_014865#(-s-:12_N9812…	NM_014865#(-s-:12_N4196747347463)	no	no	2,3	1.1076e-09	131.82	396000000
AAHGGSAASSALK	M	13	0	1126.57	sp|O94888|UBXN7_HUMAN;NM_015562#(f-:3_U7406433940387);NM_015562#(f-T:3_U8023237477738);NM_015562#(-t:3_U7784135352778);tr|F8WB69|F8WB69_HUMAN;tr|H7BYF4|H7BYF4_HUMAN	sp|O94888|UBXN7_HUMAN	yes	no	2	1.5953e-18	168.31	461400000
AAHGVLLQALDEMR	R	14	0	1522.79	sp|Q8WZA9|IRGQ_HUMAN	sp|Q8WZA9|IRGQ_HUMAN	yes	yes	2,3	1.9639e-08	96.82	257470000
AAHIFFTDTCPEPLFSELGR	K	20	0	2307.1	sp|Q15833-2|STXB2_HUMAN;NM_001127396#(f-T:19_S3327664956948);sp|Q15833|STXB2_HUMAN;NM_006949#(f-T:19_S3327664956948);tr|E7EQD5|E7EQD5_HUMAN;NM_001127396#(-s-:19_S8654346479338);NM_006949#(-s-:19_S8654346479338);NM_001127396#(r:19_S8745100295843);NM_006949#(r:19_S8745100295843);NM_001127396#(-s-s-:19_S3328967763505);NM_006949#(-s-s-:19_S3328967763505);NM_001127396#(-s-:19_S4487853718291);NM_006949…	sp|Q15833-2|STXB2_HUMAN	yes	no	2,3,4	5.919e-34	120.9	545060000
AAHLCAEAALR	K	11	0	1181.6	sp|Q9UQ80|PA2G4_HUMAN;tr|F8VTY8|F8VTY8_HUMAN;NM_006191#(-s-:12_P4307159405210);NM_006191#(f-:12_P741370121083);NM_006191#(r:12_P9587504060724);tr|F8VRZ3|F8VRZ3_HUMAN;tr|F8VR77|F8VR77_HUMAN;NM_006191#(-s-:12_P3632597629015);NM_006191#(f-T:12_P8696938730814);NM_006191#(-t:12_P7726772525260);NM_006191#(-s-:12_P6941407593327);tr|F8W0A3|F8W0A3_HUMAN;tr|H0YIN7|H0YIN7_HUMAN	sp|Q9UQ80|PA2G4_HUMAN	yes	no	2,3	5.2132e-12	175.34	5576600000
AAHLPLLTIEPPSDSSVDLSDR	R	22	0	2332.19	sp|Q5JU85-3|IQEC2_HUMAN;sp|Q5JU85|IQEC2_HUMAN;sp|Q5JU85-2|IQEC2_HUMAN	sp|Q5JU85-3|IQEC2_HUMAN	yes	no	3	0.061008	18.316	261940
AAHLSYGR	M	8	0	873.446	sp|Q96AX1|VP33A_HUMAN;tr|H3BMM5|H3BMM5_HUMAN;NM_022916#(-s-s-:12_V2410713661861);NM_022916#(-s-:12_V8171642547964);tr|F5H6Y0|F5H6Y0_HUMAN;tr|F5H7N5|F5H7N5_HUMAN	sp|Q96AX1|VP33A_HUMAN	yes	no	2	0.0053681	80.438	55379000
AAHNIHK	R	7	0	789.425	NM_018957#(r:22_S8709165473747);sp|Q9Y3L3|3BP1_HUMAN;sp|Q9Y3L3-2|3BP1_HUMAN;tr|F5GZA8|F5GZA8_HUMAN	NM_018957#(r:22_S8709165473747)	yes	no	2	0.02655	74.439	1114500
AAHSAELEAVLLALAR	K	16	0	1633.92	sp|O95613-2|PCNT_HUMAN;sp|O95613|PCNT_HUMAN;NM_006031#(-s-:21_P5025810744482);NM_006031#(-s-s-:21_P7471947725248);NM_006031#(-s-:21_P7158174520986);NM_006031#(-t:21_P5093639497427)	sp|O95613-2|PCNT_HUMAN	yes	no	3	3.3983e-24	135.91	5200800
AAHSEGNTTAGLDMR	R	15	0	1529.69	sp|P78371|TCPB_HUMAN;NM_006431#(-t:12_C6082410469128);NM_006431#(f-T:12_C1127052065931);sp|P78371-2|TCPB_HUMAN;NM_006431#(-s-:12_C2586835266634);NM_006431#(f-:12_C2110463298089);NM_006431#(-s-s-s-:12_C2748926851268);NM_006431#(-s-s-s-:12_C874960974087);NM_006431#(-s-:12_C2384914398013);NM_006431#(-s-:12_C896308616976);NM_006431#(-s-s-:12_C8871421765932);NM_006431#(-s-s-:12_C3669602880138);NM_0064…	sp|P78371|TCPB_HUMAN	no	no	2,3	2.842e-55	251.05	5468400000
AAHSMDTLGSAGAK	K	14	0	1315.62	sp|Q709F0|ACD11_HUMAN;sp|Q709F0-3|ACD11_HUMAN;sp|Q709F0-2|ACD11_HUMAN;tr|Q08AE9|Q08AE9_HUMAN	sp|Q709F0|ACD11_HUMAN	yes	no	2	0.049345	38.3	14927000
AAHTEDINACTLTTSPR	R	17	0	1856.87	sp|P04049|RAF1_HUMAN;sp|P04049-2|RAF1_HUMAN;NM_002880#(-t:3_R4938984785224);tr|B4E0X2|B4E0X2_HUMAN;NM_002880#(r:3_R3661968611666);tr|H7C155|H7C155_HUMAN;NM_002880#(-s-e-e-s-:3_R3576082621024);NM_002880#(f-:3_R4277994192152);tr|B4E1N6|B4E1N6_HUMAN	sp|P04049|RAF1_HUMAN	yes	no	3	2.3501e-24	126.46	3546800
AAHVFFTDSCPDALFNELVK	R	20	0	2280.09	NM_001032221#(-s-:9_S3458781310738);sp|P61764|STXB1_HUMAN;NM_001032221#(-s-:9_S2783401450666);NM_001032221#(-t:9_S1473300857130);NM_003165#(-s-:9_S3458781310738);sp|P61764-2|STXB1_HUMAN;NM_003165#(-s-:9_S2783401450666);NM_003165#(-t:9_S1473300857130);NM_001032221#(-s-:9_S182878311492);NM_001032221#(-s-:9_S2461213622581);NM_003165#(-s-:9_S2461213622581);NM_001032221#(-s-s-:9_S9578532947218);NM_001…	NM_001032221#(-s-:9_S3458781310738)	yes	no	2,3,4	1.7186e-58	156.73	530230000
AAHVLMPHESTVEHTHVDINEMESPLATR	R	29	0	3250.55	NM_012229#(-s-:10_N7389901826112);sp|P49902|5NTC_HUMAN;NM_012229#(-s-e-e-e-e-S-:10_N875435083581);NM_012229#(-s-s-:10_N8788723974829);NM_012229#(-s-:10_N2949596812450);NM_012229#(-s-:10_N1489512744850);tr|B7Z382|B7Z382_HUMAN;NM_012229#(-s-s-:10_N9393849256432);NM_012229#(-s-s-:10_N7890540794375);NM_012229#(-s-:10_N3152868487265);NM_012229#(-s-:10_N7022861432565);NM_012229#(-s-:10_N1618280628379);…	NM_012229#(-s-:10_N7389901826112)	yes	no	4,5,6	1.3492e-52	115.55	103690000
AAHVTLLTSLVEGEAVHLAR	K	20	0	2086.15	sp|Q92754|AP2C_HUMAN;tr|B4DWK3|B4DWK3_HUMAN	sp|Q92754|AP2C_HUMAN	yes	no	4	1.5436e-17	100.97	20200000
AAHYCHSTLK	K	10	0	1186.56	sp|Q96EK5|KBP_HUMAN	sp|Q96EK5|KBP_HUMAN	yes	yes	3	1.0331e-07	128.03	27558000
AAIAFLHALWQDR	R	13	0	1510.8	NM_015354#(-s-:9_N9595471648552);NM_015354#(-s-:9_N9745928181977);sp|Q5SRE5|NU188_HUMAN;NM_015354#(-t:9_N6436360942898);NM_015354#(-s-s-s-:9_N8382636714573);NM_015354#(-s-s-:9_N8413079391842);NM_015354#(-s-s-:9_N854314864296);NM_015354#(-s-:9_N7026548911717);NM_015354#(-s-:9_N6986737752388);NM_015354#(r:9_N4536145634921);NM_015354#(-s-:9_N3061539543528);NM_015354#(-s-:9_N7061388882383);NM_015354#…	NM_015354#(-s-:9_N9595471648552)	yes	no	2,3	4.7149e-07	88.092	6271600
AAIAPVLLDALTDPSR	K	16	0	1621.9	NM_006836#(-s-:12_G69393095546)	NM_006836#(-s-:12_G69393095546)	yes	yes	2	7.1452e-06	69.331	10319000
AAIAQALAGEVSVVPPSR	R	18	0	1734.96	sp|Q2TAY7|SMU1_HUMAN	sp|Q2TAY7|SMU1_HUMAN	yes	yes	2,3	4.435e-35	142.39	254720000
AAIAQLNGK	K	9	0	884.508	sp|Q96PK6|RBM14_HUMAN;NM_006328#(r:11_R8737586258822);NM_006328#(f-:11_R1042488097534);sp|Q96PK6-2|RBM14_HUMAN	sp|Q96PK6|RBM14_HUMAN	yes	no	2	9.5664e-06	144.38	514410000
AAIAQLNGKEVK	K	12	1	1240.71	sp|Q96PK6|RBM14_HUMAN;NM_006328#(r:11_R8737586258822);NM_006328#(f-:11_R1042488097534);sp|Q96PK6-2|RBM14_HUMAN	sp|Q96PK6|RBM14_HUMAN	yes	no	3	0.00040248	75.849	7755000
AAIAWEAGKPLCIEEVEVAPPK	K	22	1	2377.24	NM_000670#(-t:4_A8514481058526);sp|P08319|ADH4_HUMAN;sp|P08319-2|ADH4_HUMAN;NM_000670#(f-t:4_A8762826864576);NM_000670#(f-t:4_A1595555505601);NM_000670#(f-:4_A3496760049254);NM_000670#(f-:4_A9159449748994);tr|D6R9K8|D6R9K8_HUMAN;NM_000670#(r:4_A4736427934659);NM_000670#(r:4_A2240920992773);tr|D6RIB1|D6RIB1_HUMAN	NM_000670#(-t:4_A8514481058526)	yes	no	3	2.5379e-23	127.35	29455000
AAIDWFDGK	K	9	0	1021.49	NM_004960#(f-:16_F5894001511452);NM_004960#(-s-s-:16_F1127061586970);NM_004960#(-s-:16_F876680839770);NM_004960#(-t-f-:16_F6927461606107);NM_004960#(f-:16_F1979065203099);NM_004960#(f-:16_F660809569204);NM_004960#(f-:16_F5758165184688);NM_004960#(-tF-:16_F8494567306682);NM_004960#(-s-:16_F8426339431700);NM_004960#(f-:16_F7257568155498);NM_004960#(f-:16_F199005518018);NM_004960#(-t-f-:16_F88402863…	NM_004960#(f-:16_F5894001511452)	no	no	2	0.00016616	123.35	12426000000
AAIDWFDGKEFHGNIIK	K	17	1	1959.98	tr|K7EPT6|K7EPT6_HUMAN;NM_003487#(-s-:17_T2873602376840);sp|Q92804-2|RBP56_HUMAN;sp|Q92804|RBP56_HUMAN	tr|K7EPT6|K7EPT6_HUMAN	yes	no	2,3,4	4.014e-25	152.94	592270000
AAIDWFDGKEFSGNPIK	K	17	1	1893.93	NM_004960#(f-:16_F5894001511452);NM_004960#(-s-s-:16_F1127061586970);NM_004960#(-s-:16_F876680839770);NM_004960#(-t-f-:16_F6927461606107);NM_004960#(f-:16_F1979065203099);NM_004960#(f-:16_F660809569204);NM_004960#(f-:16_F5758165184688);NM_004960#(-tF-:16_F8494567306682);NM_004960#(-s-:16_F8426339431700);NM_004960#(f-:16_F7257568155498);NM_004960#(f-:16_F199005518018);NM_004960#(-t-f-:16_F88402863…	NM_004960#(f-:16_F5894001511452)	no	no	2,3,4	8.3051e-31	164.01	1486200000
AAIEAFNK	K	8	0	862.455	sp|Q9UHB9|SRP68_HUMAN;tr|G3V1U4|G3V1U4_HUMAN;NM_014230#(f-:17_S6866232073484);tr|F5H5Y3|F5H5Y3_HUMAN;sp|Q9UHB9-2|SRP68_HUMAN;NM_014230#(f-T:17_S9274503814881);NM_014230#(-t:17_S9487106280649)	sp|Q9UHB9|SRP68_HUMAN	yes	no	2	0.02057	58.426	164980000
AAIECEQPQPDLYK	R	14	0	1660.78	sp|Q8NB49-3|AT11C_HUMAN;sp|Q8NB49-2|AT11C_HUMAN;sp|Q8NB49-4|AT11C_HUMAN;sp|Q8NB49|AT11C_HUMAN	sp|Q8NB49-3|AT11C_HUMAN	yes	no	2	5.1547e-17	135.04	4489600
AAIESGHDDHESHMK	K	15	0	1662.71	NM_018181#(f-:18_Z9428810187135);NM_018181#(-s-s-s-:18_Z6851159800274);NM_018181#(-s-:18_Z7370540132462);sp|Q9HCE3|ZN532_HUMAN;NM_018181#(-s-s-:18_Z9866511185005);NM_018181#(-s-:18_Z7722482091742);NM_018181#(-s-:18_Z8259581787948);NM_018181#(-s-s-s-:18_Z5570690033133);NM_018181#(-s-s-:18_Z5917697953393);NM_018181#(-s-s-:18_Z4641772122365);NM_018181#(-s-:18_Z5088167092244);NM_018181#(-s-s-s-s-:18_…	NM_018181#(f-:18_Z9428810187135)	yes	no	4	2.5528e-05	61.649	3689300
AAIEVNAGR	R	9	0	899.482	sp|Q8N556|AFAP1_HUMAN;sp|Q8N556-2|AFAP1_HUMAN	sp|Q8N556|AFAP1_HUMAN	yes	no	2	0.0001605	126.62	89481000
AAIEYGTEEDVVK	K	13	0	1422.69	tr|Q5T321|Q5T321_HUMAN;tr|F5GXV7|F5GXV7_HUMAN;sp|Q8NFP9|NBEA_HUMAN;NM_015678#(f-:13_N8762562718769);NM_015678#(f-T:13_N2546919800004);NM_015678#(-t:13_N6726569995840);NM_015678#(-t:13_N3736113869923)	tr|Q5T321|Q5T321_HUMAN	yes	no	2	8.0979e-07	94.688	3159600
AAIGLLAR	R	8	0	783.497	sp|P07741|APT_HUMAN;NM_000485#(f-T:16_A197386283123);NM_000485#(f-:16_A876621880148);sp|P07741-2|APT_HUMAN;NM_001030018#(f-T:16_A197386283123);NM_001030018#(f-:16_A876621880148);tr|H3BQZ9|H3BQZ9_HUMAN;tr|H3BQB1|H3BQB1_HUMAN;tr|H3BQF1|H3BQF1_HUMAN;NM_000485#(f-:16_A8825927004260);NM_000485#(-s-:16_A2874163369843);NM_001030018#(f-S-T:16_A682867577738);tr|H3BSW3|H3BSW3_HUMAN;NM_001030018#(-s-:16_A23…	sp|P07741|APT_HUMAN	yes	no	2	0.0024919	117.93	1557600000
AAIHQILTENTPVSEQLSVPQR	K	22	0	2430.29	tr|Q5SZR4|Q5SZR4_HUMAN;sp|Q9Y2W6|TDRKH_HUMAN	tr|Q5SZR4|Q5SZR4_HUMAN	yes	no	3,4	3.0546e-78	171.47	178010000
AAIIADSSTFR	K	11	0	1150.6	NM_003760#(f-T:1_E7896573804643);sp|O43432|IF4G3_HUMAN;sp|O43432-3|IF4G3_HUMAN;NM_003760#(-s-:1_E7159044093560);NM_003760#(-t:1_E5351713909840);NM_003760#(f-:1_E3404521621997);NM_003760#(f-T:1_E3570704596325);NM_003760#(f-:1_E6632587670129);NM_003760#(-t:1_E4504231892833);tr|F5H564|F5H564_HUMAN;tr|Q504Z1|Q504Z1_HUMAN;tr|F5H8J4|F5H8J4_HUMAN	NM_003760#(f-T:1_E7896573804643)	yes	no	2	0.00012891	84.896	64595000
AAIISAEGDSK	K	11	0	1060.54	sp|P35232|PHB_HUMAN;NM_002634#(-t:17_P5768114140392);NM_002634#(-t:17_P8377586671799);NM_002634#(-t:17_P2211657225443);NM_002634#(f-T:17_P7087425171671);NM_002634#(f-:17_P8427936565568);NM_002634#(-s-:17_P8137026767645);tr|C9JW96|C9JW96_HUMAN;NM_002634#(-s-:17_P6954952156413);NM_002634#(-s-s-:17_P6797062889349);NM_002634#(-s-s-:17_P8253212387102);NM_002634#(-s-:17_P7931104998583)	sp|P35232|PHB_HUMAN	yes	no	2	5.196e-06	117.25	528140000
AAILDLEK	K	8	0	871.501	sp|Q15075|EEA1_HUMAN	sp|Q15075|EEA1_HUMAN	yes	yes	2	0.0058723	80.165	99411000
AAILEEK	K	7	0	772.433	NM_001077186#(-s-:19_M2451512535436);sp|Q7Z406-6|MYH14_HUMAN;NM_001077186#(-s-:19_M87342943421);sp|Q7Z406-2|MYH14_HUMAN;NM_001077186#(-s-s-:19_M1375952005241);NM_001077186#(-s-s-:19_M4131510644609);NM_024729#(-s-:19_M2451512535436);NM_001077186#(-s-:19_M3842296126377);NM_001077186#(-s-:19_M9872609382266);NM_001077186#(-t:19_M4665008061724);sp|Q7Z406|MYH14_HUMAN;NM_001077186#(-s-s-:19_M33673789407…	NM_001077186#(-s-:19_M2451512535436)	yes	no	2	0.015996	91.626	24141000
AAILETAPK	K	9	0	912.528	NM_004587#(-s-s-s-s-s-s-:20_R1508498511377);NM_004587#(-s-:20_R8837982885647);NM_004587#(-s-s-s-s-s-s-s-s-:20_R7480427617920);sp|Q9P2E9|RRBP1_HUMAN;NM_004587#(-s-s-s-s-:20_R2171955532715)	sp|Q9P2E9|RRBP1_HUMAN	no	no	2	0.001925	81.972	670400000
AAILGDTIMVAK	M	12	0	1201.67	NM_020247#(-s-:1_C6539459249328);sp|Q8NI60|ADCK3_HUMAN;NM_020247#(-t:1_C3696237514038);tr|Q5T7A4|Q5T7A4_HUMAN;NM_020247#(r:1_C607424657123);NM_020247#(-s-s-:1_C3755130503581);NM_020247#(-s-:1_C9813514465563);NM_020247#(-s-:1_C3947076111959);NM_020247#(-s-:1_C994380287030);NM_020247#(-s-:1_C966059086013);NM_020247#(-s-s-s-s-:1_C5068634525781);NM_020247#(-s-s-s-s-:1_C7447080935577);NM_020247#(-s-s-…	NM_020247#(-s-:1_C6539459249328)	yes	no	2	0.008464	54.683	24480000
AAILGFTSPVWAVR	K	14	0	1486.83	sp|Q6YHU6|THADA_HUMAN;sp|Q6YHU6-3|THADA_HUMAN;tr|H0Y3V5|H0Y3V5_HUMAN;tr|C9JER1|C9JER1_HUMAN	sp|Q6YHU6|THADA_HUMAN	yes	no	2	0.023133	34.432	5287800
AAILPTSIFLTNK	K	13	0	1387.81	sp|O14744|ANM5_HUMAN;NM_006109#(f-:14_P5155827925244);NM_006109#(-s-:14_P2439539107069);NM_006109#(-s-:14_P3066396482476);NM_006109#(f-:14_P7622347736965);NM_006109#(-t:14_P3055663574060);NM_006109#(-s-s-:14_P7019368214181);sp|O14744-2|ANM5_HUMAN;NM_001039619#(f-:14_P5155827925244);NM_006109#(r:14_P9044343086299);NM_001039619#(f-e-T:14_P517721244078);NM_001039619#(-s-:14_P2439539107069);NM_006109…	sp|O14744|ANM5_HUMAN	yes	no	2,3	2.6987e-16	142.47	3514100000
AAILQQTAEYIFSLEQEK	K	18	0	2081.07	sp|Q01664|TFAP4_HUMAN;NM_003223#(-s-:16_T1210076238172);NM_003223#(-s-:16_T7759677776105);tr|I3L254|I3L254_HUMAN	sp|Q01664|TFAP4_HUMAN	yes	no	3	7.6066e-07	65.467	11416000
AAILQTEVDALR	R	12	0	1298.72	NM_178040#(-t:12_E9592979687855);sp|Q8IUD2|RB6I2_HUMAN;tr|G8JLD3|G8JLD3_HUMAN;NM_178039#(-t:12_E9592979687855);sp|Q8IUD2-3|RB6I2_HUMAN;sp|Q8IUD2-2|RB6I2_HUMAN;NM_178040#(f-T:12_E2839872828331);NM_178039#(f-T:12_E2839872828331);NM_178040#(-t:12_E4747236553707);sp|Q8IUD2-4|RB6I2_HUMAN;NM_178039#(-t:12_E4747236553707);NM_178040#(f-T:12_E7638072355413);NM_178039#(f-T:12_E7638072355413);NM_015064#(-t:…	NM_178040#(-t:12_E9592979687855)	no	no	2	6.8371e-10	127.17	320750000
AAILSVPAAQNPEDLR	R	16	0	1663.89	sp|Q12980|NPRL3_HUMAN;tr|H7BXG2|H7BXG2_HUMAN	sp|Q12980|NPRL3_HUMAN	no	no	2	6.0387e-09	84.508	9669200
AAILWKPGAPFSIEEVEVAPPK	K	22	1	2348.28	sp|P28332|ADH6_HUMAN;sp|P28332-2|ADH6_HUMAN;tr|E9PBI1|E9PBI1_HUMAN;tr|D6RH17|D6RH17_HUMAN;tr|D6RDN5|D6RDN5_HUMAN	sp|P28332|ADH6_HUMAN	yes	no	3	2.5508e-23	128.01	12973000
AAIPSSGSLVATHDYYR	M	17	0	1806.89	NM_024299#(-t:20_C7299515414618);NM_024299#(f-:20_C4306989293752);sp|Q9H3Y8-2|PPDPF_HUMAN;NM_024299#(f-:20_C3517005352505);sp|Q9H3Y8|PPDPF_HUMAN;NM_024299#(r:20_C4669372382634)	NM_024299#(-t:20_C7299515414618)	yes	no	2	7.2659e-09	89.484	45132000
AAIQSQLDGVR	K	11	0	1156.62	sp|O60645-2|EXOC3_HUMAN;NM_007277#(-s-:5_E3051573094758);sp|O60645-3|EXOC3_HUMAN;sp|O60645|EXOC3_HUMAN;tr|D6RB59|D6RB59_HUMAN;NM_007277#(-s-s-:5_E3843713353613);NM_007277#(-s-:5_E7608414080678);tr|D6RBR9|D6RBR9_HUMAN	sp|O60645-2|EXOC3_HUMAN	yes	no	2	3.1445e-06	118.28	195710000
AAIRDIEGKLPQTEQELK	K	18	2	2038.11	sp|Q9NTJ3|SMC4_HUMAN;NM_001002800#(-s-:3_S941036860984);tr|E9PD53|E9PD53_HUMAN;NM_001002800#(-s-s-:3_S4276364324167);sp|Q9NTJ3-2|SMC4_HUMAN;NM_001002800#(-s-s-s-s-:3_S3066092561914);NM_005496#(r:3_S5274861488007);NM_005496#(f-:3_S5707763853984)	sp|Q9NTJ3|SMC4_HUMAN	yes	no	4	4.3545e-05	83.891	825590
AAISDSADCSLSPDVDPVLAFQR	K	23	0	2433.15	tr|Q5VWV2|Q5VWV2_HUMAN;sp|Q8TEW0-11|PARD3_HUMAN;sp|Q8TEW0-2|PARD3_HUMAN;sp|Q8TEW0|PARD3_HUMAN;sp|Q8TEW0-4|PARD3_HUMAN;sp|Q8TEW0-5|PARD3_HUMAN;sp|Q8TEW0-3|PARD3_HUMAN;sp|Q8TEW0-6|PARD3_HUMAN;sp|Q8TEW0-7|PARD3_HUMAN;sp|Q8TEW0-8|PARD3_HUMAN;sp|Q8TEW0-9|PARD3_HUMAN;sp|Q8TEW0-10|PARD3_HUMAN;tr|Q5VWU8|Q5VWU8_HUMAN;tr|F5GZI3|F5GZI3_HUMAN	tr|Q5VWV2|Q5VWV2_HUMAN	no	no	2,3	1.9393e-15	95.195	32867000
AAISLVPEVPK	K	11	0	1122.66	tr|G5E9I3|G5E9I3_HUMAN;NM_020314#(-t:16_C5394597843449);sp|Q7Z3J2|CP062_HUMAN;NM_020314#(f-:16_C1019458789345);NM_020314#(-s-:16_C4926237712412);tr|F5H7K1|F5H7K1_HUMAN;NM_020314#(-t:16_C1868177364484);NM_020314#(f-T:16_C494716559337);tr|E7EWW0|E7EWW0_HUMAN;NM_020314#(-s-s-:16_C4227437090043);NM_020314#(-t:16_C6666675049613);NM_020314#(-t:16_C1744935421839);NM_020314#(-s-:16_C9195182112302);NM_020…	NM_020314#(-s-:16_C732265999783)	no	no	2	0.06146	37.18	66054000
AAISSGIEDPVPTLHLTER	R	19	0	2005.05	NM_014516#(f-T:19_C9426186431102);sp|O75175|CNOT3_HUMAN;NM_014516#(-t:19_C628490282841);NM_014516#(-s-s-:19_C960832429523);NM_014516#(-s-s-s-:19_C2312802452007);sp|O75175-2|CNOT3_HUMAN;NM_014516#(-s-:19_C1007417214608);NM_014516#(f-:19_C1842055146607);sp|O75175-3|CNOT3_HUMAN;tr|H0Y5X7|H0Y5X7_HUMAN	NM_014516#(f-T:19_C9426186431102)	yes	no	2,3	2.0001e-35	133.93	977520000
AAITIQSSYR	K	10	0	1108.59	sp|Q8IZT6|ASPM_HUMAN	sp|Q8IZT6|ASPM_HUMAN	yes	yes	2	0.0043566	60.102	158910000
AAIVCYDLTDSSSFER	K	16	0	1832.83	sp|Q969Q5|RAB24_HUMAN;tr|F8W8H5|F8W8H5_HUMAN;NM_001031677#(rR:5_R9754130666833)	sp|Q969Q5|RAB24_HUMAN	yes	no	2	8.4505e-42	168.5	36144000
AAIVHNVDSDDLISMGSNDIEVLK	K	24	0	2554.26	NM_007282#(f-:3_R4277971685131);NM_007282#(-t:3_R5151839155989);NM_007282#(f-T:3_R7894968221598);NM_007282#(f-:3_R242298016008);NM_007282#(f-T:3_R976716701837);NM_007282#(-s-:3_R2438605555350);NM_007282#(-s-:3_R1796450773076);NM_007282#(f-:3_R2688932970968);NM_007282#(f-T:3_R957305626757);NM_007282#(-t:3_R8084555071447);sp|O43567|RNF13_HUMAN;NM_007282#(-t:3_R8243700498299);NM_007282#(-s-s-:3_R632…	NM_007282#(f-:3_R4277971685131)	yes	no	3	5.5213e-68	153.56	49385000
AAIVVGVELPVYDITK	R	16	0	1685.96	tr|F5H8H8|F5H8H8_HUMAN;sp|Q5SVS4|KMCP1_HUMAN;tr|E5RIW6|E5RIW6_HUMAN;NM_003951#(-s-:X_S4972078134146);tr|B4DJN2|B4DJN2_HUMAN;tr|B4DMK1|B4DMK1_HUMAN;sp|O95258-2|UCP5_HUMAN;sp|O95258|UCP5_HUMAN;sp|O95258-3|UCP5_HUMAN	tr|B4DJN2|B4DJN2_HUMAN	no	no	2	0.00076556	48.711	4617100
AAIVVHSR	K	8	0	851.498	sp|Q6P1M0|S27A4_HUMAN;NM_005094#(f-:9_S5675526339997);tr|B7Z662|B7Z662_HUMAN;sp|Q6PCB7|S27A1_HUMAN	sp|Q6P1M0|S27A4_HUMAN	no	no	2	0.088748	51.113	1073100
AAIVYHTK	R	8	0	901.502	sp|Q7Z417|NUFP2_HUMAN	sp|Q7Z417|NUFP2_HUMAN	yes	yes	2	0.014137	64.265	8157700
AAIYGGVEGGGTR	M	13	0	1206.6	sp|Q9UJ70|NAGK_HUMAN;sp|Q9UJ70-2|NAGK_HUMAN;tr|H7C3G9|H7C3G9_HUMAN;NM_017567#(-s-:2_N7960744949376);NM_017567#(-s-s-:2_N3525523479986);NM_017567#(-s-:2_N3633946293895);NM_017567#(-s-:2_N4247027371521);tr|H7C1L7|H7C1L7_HUMAN;NM_017567#(-t:2_N5151955375283)	sp|Q9UJ70|NAGK_HUMAN	yes	yes	2	7.3774e-07	107.17	22406000
AAKEAMEDGEIDGNK	K	15	1	1576.7	NM_005381#(-t:2_N1496125642353);NM_005381#(f-t:2_N5078851064966);NM_005381#(f-:2_N8833909843270);NM_005381#(-t:2_N8622516379151);NM_005381#(r:2_N380020911730);NM_005381#(-t:2_N8976627060765);NM_005381#(-t:2_N2019929968559);NM_005381#(-t:2_N1556431297860);NM_005381#(-t:2_N2693641040970);sp|P19338|NUCL_HUMAN;NM_005381#(-t:2_N268567601631);NM_005381#(f-:2_N4395329291144);NM_005381#(f-:2_N66941539533…	NM_005381#(-t:2_N1496125642353)	no	no	3	7.4278e-07	94.487	1618700
AAKLAPEFAK	R	10	1	1044.6	sp|P30041|PRDX6_HUMAN;NM_004905#(f-T:1_P3495126998130);NM_004905#(f-T:1_P3796407644803);NM_004905#(f-:1_P9831068048269);NM_004905#(r:1_P3797815395847);NM_004905#(-s-:1_P3340758340181);NM_004905#(f-:1_P4089944015746);NM_004905#(-t:1_P9350997807085);NM_004905#(f-T:1_P2928002894644);NM_004905#(-t:1_P7683892037029);NM_004905#(f-:1_P3523675828313);NM_004905#(f-:1_P1036417639769);NM_004905#(f-:1_P90677…	sp|P30041|PRDX6_HUMAN	yes	no	3	0.0014977	76.332	474600
AAKLSEGSQPAEEEEDQETPSR	R	22	1	2387.07	tr|E7EQT4|E7EQT4_HUMAN;sp|Q9UKV3|ACINU_HUMAN;NM_014977#(-s-:14_A3604459593553);NM_014977#(-s-:14_A7490241721447);NM_014977#(-s-:14_A4794745176323);NM_014977#(-s-s-:14_A1718609671231);NM_014977#(-s-s-:14_A5184409401757);NM_014977#(-s-:14_A6774361499597);NM_014977#(-s-s-s-:14_A1324406473336);NM_014977#(-s-s-:14_A933296096207);NM_014977#(-s-s-s-:14_A6624113588972);NM_014977#(-s-s-s-s-:14_A6536816286…	tr|E7EQT4|E7EQT4_HUMAN	no	no	3	0.080756	23.536	123440
AAKPEQIQK	R	9	1	1011.57	NM_003384#(-t:14_V5004281811675);NM_003384#(-t:14_V4976706064851);sp|Q99986|VRK1_HUMAN;NM_003384#(f-:14_V2100038814640)	NM_003384#(-t:14_V5004281811675)	yes	no	3	0.00024523	109.44	4745400
AAKPGPAEAPSPTASPSGDASPPATAPYDPR	R	31	1	2930.4	NM_015168#(-t:19_Z3495756892937);NM_015168#(f-:19_Z3771646693685);sp|Q9UPT8|ZC3H4_HUMAN;NM_015168#(f-T:19_Z385591500759);tr|M0QY97|M0QY97_HUMAN	sp|Q9UPT8|ZC3H4_HUMAN	no	no	3	2.6183e-08	84.152	1658600
AAKPTTTPEVK	K	11	1	1141.63	sp|P46821|MAP1B_HUMAN	sp|P46821|MAP1B_HUMAN	yes	yes	3	2.6556e-05	103.44	71312000
AAKVATK	K	7	1	687.428	sp|Q92576-2|PHF3_HUMAN;NM_015153#(f-T:6_P6069575397728);NM_015153#(-t:6_P5834802942712);NM_015153#(f-:6_P4834191577539);sp|Q92576|PHF3_HUMAN;NM_015153#(r:6_P6208221907381);tr|E7EVH3|E7EVH3_HUMAN;tr|E7ER40|E7ER40_HUMAN	sp|Q92576-2|PHF3_HUMAN	yes	no	2	0.017416	97.068	119510000
AALAALCPGDLIQAINGESTELMTHLEAQNR	K	31	0	3306.63	sp|P50479|PDLI4_HUMAN;NM_003687#(f-:5_P957831936594);sp|P50479-2|PDLI4_HUMAN	sp|P50479|PDLI4_HUMAN	yes	no	3,4,5	9.3562e-147	195.27	198150000
AALAATGAASGGGGGGGGAGSR	R	22	0	1629.78	sp|A6NKD9|CC85C_HUMAN	sp|A6NKD9|CC85C_HUMAN	yes	yes	2	1.5461e-06	81.884	9867000
AALAATLEEYK	K	11	0	1178.62	tr|F5H1H6|F5H1H6_HUMAN;sp|Q69YQ0|CYTSA_HUMAN;NM_015330#(-t:22_S954502680109);NM_015330#(f-:22_S6085303957998);NM_015330#(f-T:22_S9809733219327);tr|F8WAN1|F8WAN1_HUMAN;tr|C9J8U1|C9J8U1_HUMAN	tr|F5H1H6|F5H1H6_HUMAN	yes	no	2	1.5258e-06	122.69	182100000
AALADDFDTPR	K	11	0	1190.56	NM_024537#(-s-:13_C2636655431488);NM_024537#(-s-:13_C6619035746446);NM_024537#(-t:13_C4911171954410);sp|Q9HA77|SYCM_HUMAN;NM_024537#(f-:13_C3687254542755);NM_024537#(-s-:13_C157366757537);NM_024537#(-t:13_C8867076831416);NM_024537#(f-t:13_C7243988482633);NM_024537#(f-:13_C3113803298418);NM_024537#(-t:13_C320272172541);NM_024537#(f-T:13_C1307240915646);NM_024537#(f-:13_C8335732462574);tr|H0YFF0|H0…	NM_024537#(-s-:13_C2636655431488)	yes	no	2	3.8532e-05	105.46	166220000
AALADVLR	K	8	0	827.486	sp|Q9HC35|EMAL4_HUMAN;tr|B5MCW9|B5MCW9_HUMAN;NM_019063#(-t:2_E5714078347638);tr|B5MBZ0|B5MBZ0_HUMAN	sp|Q9HC35|EMAL4_HUMAN	yes	no	2	0.00055777	135.77	501320000
AALAEEQTEVAVK	M	13	0	1357.71	sp|Q15542|TAF5_HUMAN;sp|Q15542-2|TAF5_HUMAN	sp|Q15542|TAF5_HUMAN	yes	no	2	2.0717e-07	113.24	1152000
AALAEITEMVAQLHGTMIK	R	19	0	2026.06	NM_005766#(-s-:13_F9635874993825);NM_005766#(-t:13_F5863744333937);sp|Q9Y4F1|FARP1_HUMAN;tr|C9JME2|C9JME2_HUMAN;sp|Q9Y4F1-2|FARP1_HUMAN;NM_005766#(-s-:13_F6535308819528);NM_005766#(f-T:13_F5979815773550);tr|H0Y783|H0Y783_HUMAN;tr|M0QXT1|M0QXT1_HUMAN	NM_005766#(-s-:13_F9635874993825)	yes	no	3	3.377e-05	64.705	8306800
AALAGGTTMIIDHVVPEPESSLTEAYEK	K	28	0	2928.44	sp|Q14195-2|DPYL3_HUMAN;sp|Q14195|DPYL3_HUMAN;NM_001387#(-s-:5_D1728727162763);NM_001387#(-s-:5_D2448246693073);NM_001387#(-s-:5_D4332319849326);NM_001387#(-s-s-:5_D9008962398025);NM_001387#(-s-s-:5_D8071216804000);NM_001387#(-s-s-s-s-s-:5_D32747760890);NM_001387#(-s-s-s-s-:5_D2820948126771);NM_001387#(-s-s-s-:5_D6728987446563);NM_001387#(-s-s-s-s-:5_D7588405488383);NM_001387#(-s-s-s-:5_D76950758…	sp|Q14195-2|DPYL3_HUMAN	yes	no	3,4	3.1387e-99	171.63	574860000
AALAGGTTMIIDHVVPEPGTSLLAAFDQWR	K	30	0	3136.6	sp|Q16555-2|DPYL2_HUMAN;NM_001386#(-t:8_D274018747841);sp|Q16555|DPYL2_HUMAN;NM_001386#(-s-:8_D2336771295484);NM_001386#(-s-:8_D3441239726770);NM_001386#(-s-:8_D1632823806818);NM_001386#(-s-s-s-:8_D9274826815892);NM_001386#(-s-s-s-s-:8_D2744633617662);NM_001386#(-s-s-:8_D7699231014388);NM_001386#(-s-s-s-s-s-:8_D1749982132286);NM_001386#(-s-s-s-s-:8_D7058772980464);NM_001386#(-s-s-s-s-s-:8_D383048…	sp|Q16555-2|DPYL2_HUMAN	no	no	3,4	1.4049e-77	151.28	406370000
AALAGHPR	R	8	0	791.44	sp|Q15102|PA1B3_HUMAN;tr|M0R1K3|M0R1K3_HUMAN;NM_002573#(r:19_P4990346753177)	sp|Q15102|PA1B3_HUMAN	yes	no	2	0.00065433	134.66	60342000
AALAGLSLSLMER	K	13	0	1330.73	sp|P38935|SMBP2_HUMAN;NM_002180#(f-:11_I1352140984029)	sp|P38935|SMBP2_HUMAN	yes	no	2	1.1371e-05	80.96	27700000
AALAHSEEVTASQVAATK	R	18	0	1782.91	sp|Q15149-3|PLEC_HUMAN;NM_201381#(-s-s-s-s-s-s-s-:8_P6621846105569);NM_201381#(-s-s-s-s-s-s-:8_P8321402263697);NM_201381#(-s-s-s-s-s-s-s-s-s-s-s-:8_P4728626145876);NM_201381#(-s-s-s-s-s-s-s-s-s-s-:8_P4672746876300);NM_201381#(-s-s-s-s-s-s-s-s-s-s-:8_P6382015390916)	sp|Q15149-3|PLEC_HUMAN	no	no	2,3,4	7.5805e-75	246.12	3643400000
AALANLCIGDVITAIDGENTSNMTHLEAQNR	K	31	0	3311.59	NM_020992#(-s-:10_P3807465483372);NM_020992#(f-:10_P6694016058966);NM_020992#(-t:10_P174972484154);NM_020992#(-s-s-:10_P8416219833281);sp|O00151|PDLI1_HUMAN;NM_020992#(-t:10_P6079582619982)	sp|O00151|PDLI1_HUMAN	no	no	3,4	2.3675e-209	282.95	1431500000
AALAPELALEIPSGSQADIPLPK	R	23	0	2300.26	sp|Q8IVF2-3|AHNK2_HUMAN;sp|Q8IVF2|AHNK2_HUMAN	sp|Q8IVF2-3|AHNK2_HUMAN	yes	no	2,3,4	9.5099e-42	132.83	323190000
AALAPLPPLPAQFK	M	14	0	1432.84	NM_016485#(-t:6_V5249894189228);NM_016485#(f-:6_V9891601411997);sp|Q9NP79|VTA1_HUMAN;NM_016485#(-s-:6_V6260478411372);NM_016485#(f-T:6_V4754130424766);NM_016485#(f-:6_V5505316362801);NM_016485#(-t:6_V1550698827942);NM_016485#(f-T:6_V9384291751760);NM_016485#(-t:6_V5809633644599)	NM_016485#(-t:6_V5249894189228)	yes	no	2,3	8.5814e-07	91.961	1827900000
AALAPYNWPVWLGVHDR	R	17	0	1964.01	sp|Q9Y240|CLC11_HUMAN	sp|Q9Y240|CLC11_HUMAN	yes	yes	3	2.2913e-06	62.861	13181000
AALCAVHVIR	K	10	0	1108.62	NM_001030007#(-s-s-s-s-s-s-s-s-s-s-:16_A2274194244238)	NM_001030007#(-s-s-s-s-s-s-s-s-s-s-:16_A2274194244238)	no	no	2,3	9.2955e-06	116.37	693280000
AALCHFCIDMLNAK	K	14	0	1662.77	sp|P54920|SNAA_HUMAN;NM_003827#(-t:19_N9436669185024);NM_003827#(f-T:19_N1202110473375);NM_003827#(f-:19_N3107706360758);NM_003827#(-s-s-:19_N4911108420368);tr|M0R0Y2|M0R0Y2_HUMAN;NM_003827#(-t:19_N5433203885831);NM_003827#(-t:19_N794752187613);NM_003827#(f-T:19_N7212307040548);NM_003827#(f-:19_N1892995125611);tr|M0R2M1|M0R2M1_HUMAN;tr|M0R0I4|M0R0I4_HUMAN	sp|P54920|SNAA_HUMAN	yes	no	2,3	6.7844e-13	119.88	568120000
AALCHFIVDELNAK	K	14	0	1599.81	tr|B4DK44|B4DK44_HUMAN;sp|Q9H115|SNAB_HUMAN;NM_022080#(-s-s-:20_N2322718911801);tr|Q4G0M0|Q4G0M0_HUMAN;NM_022080#(-t:20_N7955293540759);NM_022080#(-s-:20_N6956517624881);NM_022080#(-s-s-:20_N6949204594199);NM_022080#(-s-:20_N6288395297958);NM_022080#(-s-s-s-s-:20_N6913430687305)	tr|B4DK44|B4DK44_HUMAN	yes	no	3	0.027343	31.914	15076000
AALDAAAK	R	8	0	729.402	sp|Q9NZC9|SMAL1_HUMAN;tr|H7BYI2|H7BYI2_HUMAN;NM_014140#(f-:2_S9368303593373)	sp|Q9NZC9|SMAL1_HUMAN	yes	no	2	0.063825	42.599	446500
AALDCSTSHLDEFYSDPHAVAGALK	K	25	0	2674.23	sp|Q68EM7-2|RHG17_HUMAN;sp|Q68EM7-6|RHG17_HUMAN;sp|Q68EM7-5|RHG17_HUMAN;sp|Q68EM7|RHG17_HUMAN;NM_018054#(-s-:16_A1645118273535);NM_018054#(f-s-T:16_A1765397375888);NM_001006634#(-s-:16_A1645118273535);NM_001006634#(f-s-T:16_A1765397375888);NM_018054#(-s-:16_A6253343683398);NM_001006634#(-s-:16_A6253343683398);NM_018054#(-s-s-:16_A9012764541808);NM_001006634#(-s-s-:16_A9012764541808);NM_018054#(-t…	sp|Q68EM7-2|RHG17_HUMAN	no	no	3,4	1.7435e-135	252.47	483310000
AALDEQFEPQK	K	11	0	1274.61	sp|P15428-5|PGDH_HUMAN;sp|P15428|PGDH_HUMAN;tr|E9PD69|E9PD69_HUMAN;sp|P15428-4|PGDH_HUMAN;tr|E9PBZ2|E9PBZ2_HUMAN;sp|P15428-2|PGDH_HUMAN	sp|P15428-5|PGDH_HUMAN	yes	no	2	2.5534e-06	117.25	39860000
AALDGPLDAALDHLR	K	15	0	1546.81	sp|Q12756-3|KIF1A_HUMAN;sp|Q12756-2|KIF1A_HUMAN;sp|Q12756|KIF1A_HUMAN;NM_004321#(-s-:2_K8601421901774);NM_004321#(-s-:2_K2674166700473);tr|F8W8V9|F8W8V9_HUMAN;tr|H7C437|H7C437_HUMAN	sp|Q12756-3|KIF1A_HUMAN	yes	no	3	9.8839e-12	102.5	46750000
AALDGTPGMIGYGMAK	K	16	0	1551.74	sp|P09417|DHPR_HUMAN;NM_000320#(f-:4_Q5870076449512);NM_000320#(-s-T:4_Q6201652134930);tr|B3KW71|B3KW71_HUMAN;NM_000320#(f-s-T:4_Q5817940678799);NM_000320#(-s-:4_Q757095329656);NM_000320#(f-s-:4_Q9451261016663);NM_000320#(-t:4_Q651107371875);NM_000320#(f-:4_Q3330521210217);NM_000320#(-s-:4_Q6589057694527);NM_000320#(r:4_Q3853008477755);NM_000320#(f-:4_Q2293049519984);NM_000320#(-s-s-:4_Q160147680…	sp|P09417|DHPR_HUMAN	yes	no	2,3	4.647e-09	88.561	578350000
AALDSGAFQSVWVSTDHDEIENVAK	R	25	0	2688.27	sp|Q8NFW8|NEUA_HUMAN;sp|Q8NFW8-2|NEUA_HUMAN	sp|Q8NFW8|NEUA_HUMAN	yes	no	3	3.9976e-110	213.2	95963000
AALDSINELPENILLELFTHVPAR	K	24	0	2674.43	sp|Q9NRD1|FBX6_HUMAN;NM_018438#(-s-:1_F2283720257809)	sp|Q9NRD1|FBX6_HUMAN	yes	no	3	1.4606e-85	177.03	10732000
AALDSLSLFTSLGLSEQK	M	18	0	1878.99	NM_005051#(-s-s-s-s-s-s-:3_Q647697356391);NM_005051#(-s-s-s-s-s-s-s-:3_Q8416589614166);NM_005051#(-s-s-s-:3_Q3988675599679);NM_005051#(-s-s-s-s-s-s-s-s-:3_Q6330313588731);NM_005051#(-s-:3_Q7728572172692);NM_005051#(-s-s-:3_Q8888265806268);NM_005051#(-s-s-s-s-s-s-s-s-s-s-:3_Q8058535253018);NM_005051#(-s-s-s-s-s-s-:3_Q8849324454667);NM_005051#(-s-s-s-s-s-s-s-s-s-s-s-:3_Q199991336007);NM_005051#(-s-…	NM_005051#(-s-:3_Q2719665117827)	no	no	2,3	8.9959e-96	285.59	277950000
AALDTLGLR	R	9	0	928.534	sp|O95873|CF047_HUMAN	sp|O95873|CF047_HUMAN	yes	yes	2	0.0010905	95.358	49413000
AALEAAAAAAPER	R	13	0	1210.63	sp|Q86UK7-2|ZN598_HUMAN;sp|Q86UK7-3|ZN598_HUMAN;sp|Q86UK7|ZN598_HUMAN	sp|Q86UK7-2|ZN598_HUMAN	yes	no	2	1.4802e-08	117.93	93001000
AALEACHK	R	8	0	898.433	sp|P11766|ADHX_HUMAN;NM_000671#(f-t:4_A7981177037436);NM_000671#(-s-:4_A7223194557187);NM_000671#(-s-:4_A3278495388816);NM_000671#(-t:4_A3856934419591)	sp|P11766|ADHX_HUMAN	no	no	3	0.032	39.253	128880
AALEAIDELDLFGAHGGR	K	18	0	1853.93	NM_000292#(-s-:X_P4448875690963);NM_000292#(-s-:X_P6318521799039);sp|P46019|KPB2_HUMAN;NM_000292#(-s-:X_P9168788556961)	NM_000292#(-s-:X_P4448875690963)	yes	no	2,3	3.6808e-52	162.59	143240000
AALEAIDELDLFGAHGGRK	K	19	1	1982.02	NM_000292#(-s-:X_P4448875690963);NM_000292#(-s-:X_P6318521799039);sp|P46019|KPB2_HUMAN;NM_000292#(-s-:X_P9168788556961)	NM_000292#(-s-:X_P4448875690963)	yes	no	4	5.1669e-06	68.243	1367500
AALEALDELDLFGVK	K	15	0	1602.85	NM_001122670#(f-:X_P491301734251);sp|P46020-2|KPB1_HUMAN;NM_002637#(f-:X_P491301734251);sp|P46020|KPB1_HUMAN;tr|A6NMN0|A6NMN0_HUMAN;sp|P46020-3|KPB1_HUMAN;tr|A6NIT2|A6NIT2_HUMAN;NM_001122670#(f-T:X_P8004262498546);NM_001122670#(-t:X_P1753541909878);NM_002637#(f-T:X_P8004262498546);NM_002637#(-t:X_P1753541909878)	NM_001122670#(f-:X_P491301734251)	yes	no	2,3	1.5012e-09	90.707	59071000
AALEALGSCLNNK	R	13	0	1359.68	NM_005412#(f-T:12_S3967499251578);NM_005412#(-s-s-s-s-:12_S3621803936379)	NM_005412#(f-T:12_S3967499251578)	no	no	2,3	2.7773e-18	172.13	5675900000
AALEALGSCLNNKYSEGYPGK	R	21	1	2241.07	NM_005412#(f-T:12_S3967499251578);NM_005412#(-s-s-s-s-:12_S3621803936379)	NM_005412#(f-T:12_S3967499251578)	no	no	3	9.2577e-08	90.464	11730000
AALEALLGR	R	9	0	912.539	sp|O15061|SYNEM_HUMAN;sp|O15061-2|SYNEM_HUMAN;sp|O15061-3|SYNEM_HUMAN;tr|C9JIE4|C9JIE4_HUMAN	sp|O15061|SYNEM_HUMAN	no	no	2	0.0017694	82.75	26892000
AALEALLPYTER	R	12	0	1345.72	sp|Q12788|TBL3_HUMAN;NM_006453#(-t:16_T9573706230116);NM_006453#(f-:16_T8796763715702);NM_006453#(f-:16_T9697019060794);tr|J3KNP2|J3KNP2_HUMAN;NM_006453#(r:16_T3079793119050);NM_006453#(f-:16_T6050728732471)	sp|Q12788|TBL3_HUMAN	yes	no	2,3	1.8272e-07	117.86	689990000
AALEAQNALHNIK	K	13	0	1391.75	NM_006561#(-s-s-:10_C3029594516730);NM_006561#(-s-:10_C6437790307415);NM_006561#(-s-:10_C5865238463063);tr|E9PC62|E9PC62_HUMAN;NM_006561#(-s-:10_C9268129205433);NM_006561#(-s-s-s-:10_C7478752484286);NM_006561#(-s-s-:10_C6822564776913);NM_001083591#(-s-s-:10_C2820731630548);NM_001025076#(-s-s-:10_C3029594516730);NM_006561#(-t:10_C9969940673302);NM_001025077#(-s-s-:10_C3029594516730);NM_001083591#(…	NM_006561#(-s-s-:10_C3029594516730)	yes	no	2,3	2.4793e-16	145.08	123600000
AALEAQNALHNMK	K	13	0	1409.71	NM_006560#(-s-s-s-:11_C6803936675068);sp|Q92879-4|CELF1_HUMAN;tr|G5EA30|G5EA30_HUMAN;NM_198700#(-s-s-s-:11_C8577428663373);NM_001025596#(-s-s-s-:11_C3384080085545);NM_006560#(-s-s-:11_C8490522808202);NM_001025596#(-s-s-:11_C8490522808202);NM_006560#(-s-s-:11_C9392734191225);NM_001025596#(-s-s-:11_C9392734191225);NM_006560#(-s-:11_C3996021820231);NM_198700#(-s-:11_C3996021820231);NM_001025596#(-s-…	NM_006560#(-s-s-s-:11_C6803936675068)	no	no	2,3	1.7019e-18	151.98	2761300000
AALEAVGGTVVLE	K	13	0	1227.67	sp|P52815|RM12_HUMAN;NM_002949#(-s-:17_M3982489241881)	sp|P52815|RM12_HUMAN	yes	no	2,3	1.2854e-06	96.229	126260000
AALEDSSGSSELQEIMR	K	17	0	1821.84	sp|Q12929|EPS8_HUMAN;NM_004447#(f-T:12_E8302223152418);NM_004447#(-s-:12_E437181560657);NM_004447#(-s-:12_E5495903149261);NM_004447#(-s-s-:12_E4029377555658);NM_004447#(-t:12_E5467727360625);NM_004447#(f-:12_E7957763623564);tr|B4DX66|B4DX66_HUMAN;NM_004447#(f-T:12_E7400099935042);NM_004447#(-s-:12_E49735095149);NM_004447#(-s-s-s-s-:12_E2734471979339);NM_004447#(-s-:12_E2978982593283);NM_004447#(-…	sp|Q12929|EPS8_HUMAN	yes	no	2	1.8816e-56	233.14	35578000
AALEDSSGSSELQEIMRR	K	18	1	1977.94	sp|Q12929|EPS8_HUMAN;NM_004447#(f-T:12_E8302223152418);NM_004447#(-s-:12_E437181560657);NM_004447#(-s-:12_E5495903149261);NM_004447#(-s-s-:12_E4029377555658);NM_004447#(-t:12_E5467727360625);NM_004447#(f-:12_E7957763623564);tr|B4DX66|B4DX66_HUMAN;NM_004447#(f-T:12_E7400099935042);NM_004447#(-s-:12_E49735095149);NM_004447#(-s-s-s-s-:12_E2734471979339);NM_004447#(-s-:12_E2978982593283);NM_004447#(-…	sp|Q12929|EPS8_HUMAN	yes	no	3	0.021028	32.366	9681800
AALEEANGEIEK	K	12	0	1272.62	sp|Q8NB16|MLKL_HUMAN;NM_152649#(-s-:16_M9777816951137);tr|I3L2T9|I3L2T9_HUMAN;sp|Q8NB16-2|MLKL_HUMAN;tr|I3L4Z5|I3L4Z5_HUMAN	sp|Q8NB16|MLKL_HUMAN	yes	no	2	8.3994e-10	125.54	27092000
AALEEEVR	R	8	0	915.466	NM_006747#(-t:11_S237575342909);sp|Q96FS4|SIPA1_HUMAN;tr|F6RY50|F6RY50_HUMAN;NM_006747#(-s-:11_S3723652054565);NM_006747#(-s-s-s-:11_S4165510210049)	NM_006747#(-t:11_S237575342909)	yes	no	2	0.0043742	91.318	5351100
AALEEFSR	K	8	0	921.456	NM_003074#(-s-:3_S5157930513375);sp|Q92922|SMRC1_HUMAN;NM_003074#(-t:3_S8637391799374);NM_003074#(-s-:3_S5319372730775);NM_003074#(-s-:3_S5226461406530);NM_003074#(f-:3_S3428524986273);NM_003074#(f-T:3_S5289152480051)	NM_003074#(-s-:3_S5157930513375)	yes	no	2	0.0021504	116.25	79005000
AALEELVK	R	8	0	871.501	tr|D6REN6|D6REN6_HUMAN;NM_002109#(f-:5_H2190672678423);sp|P12081|SYHC_HUMAN;NM_002109#(f-:5_H9930853858100);tr|B4DDD8|B4DDD8_HUMAN;tr|J3KNE5|J3KNE5_HUMAN;sp|P12081-2|SYHC_HUMAN;tr|B4E1C5|B4E1C5_HUMAN;tr|E7ETE2|E7ETE2_HUMAN;tr|D6RF05|D6RF05_HUMAN	tr|D6REN6|D6REN6_HUMAN	yes	no	2	0.0042319	99.755	1293700000
AALEEVEGDVAELELK	R	16	0	1713.87	sp|Q15057|ACAP2_HUMAN	sp|Q15057|ACAP2_HUMAN	yes	yes	3	8.6434e-10	86.548	5266100
AALEEVER	K	8	0	915.466	sp|Q15149-3|PLEC_HUMAN;NM_201381#(-s-s-s-s-s-s-s-:8_P6621846105569);NM_201381#(-s-s-s-s-s-s-:8_P8321402263697);NM_201381#(-s-s-s-s-s-s-s-s-s-s-s-:8_P4728626145876);NM_201381#(-s-s-s-s-s-s-s-s-s-s-:8_P4672746876300)	sp|Q15149-3|PLEC_HUMAN	no	no	2	0.00098594	124.98	108070000
AALEEVYPDLTPEETR	R	16	0	1831.88	NM_012255#(-s-s-s-s-s-s-:20_X555863001685);NM_012255#(-s-s-s-s-s-s-:20_X4561792510064);NM_012255#(-s-s-s-s-s-:20_X6387322432808);NM_012255#(-s-:20_X5498159112637);sp|Q9H0D6|XRN2_HUMAN;NM_012255#(-s-:20_X4471486196028);sp|Q9H0D6-2|XRN2_HUMAN;NM_012255#(-s-s-:20_X7170116308311);tr|B4DZC3|B4DZC3_HUMAN;NM_012255#(-t:20_X5237243886905);NM_012255#(-s-:20_X4416419819843);NM_012255#(-s-s-:20_X22900969454…	NM_012255#(-s-:20_X5498159112637)	no	no	2,3	8.7806e-42	174.59	949860000
AALEEVYPDLTPEETRR	R	17	1	1987.99	NM_012255#(-s-s-s-s-s-s-:20_X555863001685);NM_012255#(-s-s-s-s-s-s-:20_X4561792510064);NM_012255#(-s-s-s-s-s-:20_X6387322432808);NM_012255#(-s-:20_X5498159112637);sp|Q9H0D6|XRN2_HUMAN;NM_012255#(-s-:20_X4471486196028);sp|Q9H0D6-2|XRN2_HUMAN;NM_012255#(-s-s-:20_X7170116308311);tr|B4DZC3|B4DZC3_HUMAN;NM_012255#(-t:20_X5237243886905);NM_012255#(-s-:20_X4416419819843);NM_012255#(-s-s-:20_X22900969454…	NM_012255#(-s-:20_X5498159112637)	no	no	2,3,4	2.4073e-42	174.4	223670000
AALEEWLPR	R	9	0	1083.57	sp|P78549|NTHL1_HUMAN;tr|H3BPD5|H3BPD5_HUMAN;NM_002528#(-s-:16_N4299994955697);NM_002528#(f-:16_N454217939937)	sp|P78549|NTHL1_HUMAN	yes	no	2	0.020267	55.235	8041900
AALEGTATYR	R	10	0	1051.53	sp|Q9NRV9|HEBP1_HUMAN	sp|Q9NRV9|HEBP1_HUMAN	yes	yes	2	3.7498e-07	152.97	502010000
AALEKPMDLEEEK	K	13	1	1501.73	sp|O14967|CLGN_HUMAN	sp|O14967|CLGN_HUMAN	yes	yes	2,3	3.7636e-07	106.32	85527000
AALEKPMDLEEEKK	K	14	2	1629.83	sp|O14967|CLGN_HUMAN	sp|O14967|CLGN_HUMAN	yes	yes	3,4	3.8756e-10	145.43	160690000
AALELEMWK	K	9	0	1089.55	sp|Q8N960-2|CE120_HUMAN;sp|Q8N960|CE120_HUMAN;tr|D6REX9|D6REX9_HUMAN	sp|Q8N960-2|CE120_HUMAN	yes	no	2	0.0049729	64.841	3132300
AALELLSLDLK	K	11	0	1184.7	NM_007186#(-s-:20_C733149920572);sp|Q9BV73|CP250_HUMAN;NM_001035518#(-s-:20_C733149920572);sp|Q9BV73-2|CP250_HUMAN;NM_001035518#(rr:20_C8418933065060);NM_007186#(rr:20_C8418933065060)	NM_007186#(-s-:20_C733149920572)	yes	no	2	2.7968e-05	108.35	20140000
AALEQDLAFWYGPR	K	14	0	1635.8	sp|P09601|HMOX1_HUMAN;tr|B1AHA8|B1AHA8_HUMAN	sp|P09601|HMOX1_HUMAN	yes	no	2,3	1.7868e-28	209.25	152290000
AALEQLLK	K	8	0	884.533	NM_004819#(-t:19_S5363830542104);sp|Q92797|SYMPK_HUMAN;NM_004819#(-s-:19_S8032448049609);NM_004819#(f-t:19_S1745324424676);NM_004819#(f-:19_S7427604167560);NM_004819#(-t:19_S8559268653380);NM_004819#(-s-:19_S3556301232436);NM_004819#(-s-s-:19_S3610033576119);NM_004819#(-t:19_S4495216877623);NM_004819#(-s-:19_S4725539693498);NM_004819#(f-:19_S4448470197889);NM_004819#(f-T:19_S9842768167044);NM_004…	NM_004819#(-t:19_S5363830542104)	yes	no	2	0.0073665	75.738	213230000
AALEQPCEGSLTR	K	13	0	1430.68	sp|Q6PUV4|CPLX2_HUMAN;tr|D6RGY3|D6RGY3_HUMAN;tr|D6R960|D6R960_HUMAN	sp|Q6PUV4|CPLX2_HUMAN	yes	no	2	2.1594e-07	104.24	264030000
AALEQPCEGSLTRPK	K	15	1	1655.83	sp|Q6PUV4|CPLX2_HUMAN;tr|D6RGY3|D6RGY3_HUMAN;tr|D6R960|D6R960_HUMAN	sp|Q6PUV4|CPLX2_HUMAN	yes	no	2,3	4.5319e-20	159.22	1288500000
AALEQPCEGSLTRPKK	K	16	2	1783.93	sp|Q6PUV4|CPLX2_HUMAN;tr|D6RGY3|D6RGY3_HUMAN;tr|D6R960|D6R960_HUMAN	sp|Q6PUV4|CPLX2_HUMAN	yes	no	4	2.3917e-06	98.281	12623000
AALETDENLLLCAPTGAGK	R	19	0	1942.97	sp|O75643|U520_HUMAN;NM_014014#(-s-:2_A7560875699781);NM_014014#(-s-s-:2_A1590888029879);NM_014014#(r:2_A1124837584179);NM_014014#(-s-s-s-:2_A3429679243742);NM_014014#(r:2_A5495918166371);NM_014014#(-s-s-s-s-:2_A5731425942818);NM_014014#(-s-s-s-s-s-:2_A7639038295287);NM_014014#(-s-s-s-s-s-s-:2_A3282950609663);NM_014014#(-s-s-s-s-s-s-s-:2_A5602500352109);NM_014014#(-s-s-s-s-s-s-s-s-:2_A67286946814…	sp|O75643|U520_HUMAN	yes	no	2,3,4	1.5558e-54	180.39	1015300000
AALEYLEDIDLK	K	12	0	1391.72	sp|Q9BRX8-2|F213A_HUMAN;NM_032333#(-t:10_C5479030552175);sp|Q9BRX8|F213A_HUMAN;NM_032333#(f-:10_C3434640486887);NM_032333#(f-:10_C3694318967351);NM_032333#(f-T:10_C3102424697225);NM_032333#(-t:10_C1408070228410);NM_032333#(-t-e-F-:10_C2584083206924);NM_032333#(f-:10_C6313107357366)	sp|Q9BRX8-2|F213A_HUMAN	yes	no	2,3	2.3447e-10	124.12	180010000
AALEYLEDIDLKTLEKEPR	K	19	2	2245.18	sp|Q9BRX8-2|F213A_HUMAN;NM_032333#(-t:10_C5479030552175);sp|Q9BRX8|F213A_HUMAN;NM_032333#(f-:10_C3434640486887);NM_032333#(f-:10_C3694318967351);NM_032333#(f-T:10_C3102424697225);NM_032333#(-t:10_C1408070228410);NM_032333#(-t-e-F-:10_C2584083206924);NM_032333#(f-:10_C6313107357366)	sp|Q9BRX8-2|F213A_HUMAN	yes	no	4	2.0311e-05	83.894	280330
AALEYLGSFDHYAT	R	14	0	1556.71	NM_130440#(-s-:1_P386495974651);NM_002840#(-s-:1_P386495974651);sp|P10586-2|PTPRF_HUMAN;sp|P10586|PTPRF_HUMAN;NM_130440#(-s-:1_P7028072940705);NM_002840#(-s-:1_P7028072940705);NM_130440#(f-:1_P1195206266540);NM_002840#(f-:1_P1195206266540);NM_130440#(-s-:1_P1746140085334);NM_002840#(-s-:1_P1746140085334);NM_130440#(-s-s-s-:1_P7103386047548);NM_002840#(-s-s-s-:1_P7103386047548);NM_130440#(-s-:1_P8…	NM_130440#(-s-:1_P386495974651)	no	no	2	0.00010962	62.454	88615000
AALFALQNLFEEK	K	13	0	1492.79	NM_000254#(-t:1_M1199472977688);sp|Q99707|METH_HUMAN;tr|B7ZLW7|B7ZLW7_HUMAN	NM_000254#(-t:1_M1199472977688)	yes	no	2,3	3.7268e-12	127.56	37435000
AALFVEACLK	R	10	0	1120.6	sp|Q9BZH6|WDR11_HUMAN;NM_018117#(f-T:10_B3059434147733);NM_018117#(-t:10_B9478573053940);NM_018117#(f-:10_B1413991860462);NM_018117#(f-:10_B293604267086)	sp|Q9BZH6|WDR11_HUMAN	yes	no	2	0.053068	35.652	941490
AALFVSNNSR	K	10	0	1077.56	sp|Q96GD0|PLPP_HUMAN	sp|Q96GD0|PLPP_HUMAN	yes	yes	2	0.0029911	79.16	28088000
AALGEPVRLER	M	11	1	1209.68	sp|Q9NUP9|LIN7C_HUMAN;tr|G3V1D4|G3V1D4_HUMAN	sp|Q9NUP9|LIN7C_HUMAN	yes	no	2	4.1159e-05	110.08	41006000
AALGHLAGEAAAAPGPGTPCASR	M	23	0	2102.03	NM_023080#(-t:8_C4193244208242);sp|Q9H7E9|CH033_HUMAN;sp|Q9H7E9-2|CH033_HUMAN;NM_023080#(-s-:8_C2924077676956)	NM_023080#(-t:8_C4193244208242)	yes	no	2,3	2.1108e-85	210.38	491110000
AALGPLVTGLYDVQAFK	R	17	0	1761.97	sp|P11172|UMPS_HUMAN;NM_000373#(-t:3_U7292758352025);NM_000373#(f-:3_U9843864073649);tr|E9PFD2|E9PFD2_HUMAN;tr|F2Z3P2|F2Z3P2_HUMAN;tr|F2Z303|F2Z303_HUMAN;tr|F8WDG4|F8WDG4_HUMAN	sp|P11172|UMPS_HUMAN	yes	no	2,3	2.6318e-43	188.39	1872400000
AALGPSSQNVTEYVVR	M	16	0	1689.87	sp|P35269|T2FA_HUMAN;NM_002096#(r:19_G9498763380744);tr|M0R0Z3|M0R0Z3_HUMAN	sp|P35269|T2FA_HUMAN	yes	no	2,3	4.3797e-30	160.65	354930000
AALGPSSQNVTEYVVRVPK	M	19	1	2014.08	sp|P35269|T2FA_HUMAN;NM_002096#(r:19_G9498763380744);tr|M0R0Z3|M0R0Z3_HUMAN	sp|P35269|T2FA_HUMAN	yes	no	3	3.0911e-09	109.72	2172200
AALGSPSHTFR	M	11	0	1142.58	sp|Q96HJ9|CG055_HUMAN	sp|Q96HJ9|CG055_HUMAN	no	no	2	1.3557e-06	131.82	516700000
AALGVAEAVAAPHPAEGAETAEAVELSR	M	28	0	2686.36	sp|Q86Y56|HEAT2_HUMAN;sp|Q86Y56-2|HEAT2_HUMAN;NM_017802#(-s-:7_H9316400443084);NM_017802#(f-T:7_H6781905453620);NM_017802#(-t:7_H6873018455889)	sp|Q86Y56|HEAT2_HUMAN	yes	no	2,3,4	8.3674e-53	146.17	186380000
AALGVLESDLPSAVTLLK	M	18	0	1796.03	NM_015514#(rR:14_N3932790083755);NM_015514#(-t:14_N2720126632401);sp|Q8NEJ9-2|NGDN_HUMAN;NM_001042635#(-t:14_N2720126632401);sp|Q8NEJ9|NGDN_HUMAN;NM_015514#(f-T:14_N3801065387137);NM_015514#(f-:14_N6034969252493);NM_001042635#(f-T:14_N3801065387137);NM_001042635#(f-:14_N6034969252493)	NM_015514#(rR:14_N3932790083755)	yes	no	2,3	8.8325e-43	163.91	1191800000
AALGVLR	K	7	0	698.444	tr|B4DX24|B4DX24_HUMAN;sp|P22570|ADRO_HUMAN;tr|E7EQC1|E7EQC1_HUMAN;sp|P22570-2|ADRO_HUMAN;sp|P22570-3|ADRO_HUMAN;tr|B7Z7G2|B7Z7G2_HUMAN;tr|G3V0F2|G3V0F2_HUMAN;tr|B4DQQ4|B4DQQ4_HUMAN	tr|B4DX24|B4DX24_HUMAN	no	no	2	0.0068452	121.68	279510000
AALGYDYK	K	8	0	899.439	NM_005335#(-s-:3_H1761081765109);sp|P14317|HCLS1_HUMAN;NM_005335#(-s-s-:3_H6305280481902);NM_005335#(-s-:3_H7432318584953);NM_005335#(-s-:3_H6432800748138);NM_005335#(-s-:3_H1784039929499);NM_005335#(-s-s-s-:3_H2756191382464);NM_005335#(-s-s-:3_H9868100140547);NM_005335#(-s-s-:3_H617386588406);NM_005335#(-s-:3_H7397979518909);NM_005335#(-s-:3_H1526523985343);NM_005335#(-s-s-s-:3_H5707029130481);N…	NM_005335#(-s-:3_H1761081765109)	yes	no	2	0.02045	57.59	52354000
AALGYDYKGETEKHESQR	K	18	2	2080.98	NM_005335#(-s-:3_H1761081765109);sp|P14317|HCLS1_HUMAN;NM_005335#(-s-s-:3_H6305280481902);NM_005335#(-s-:3_H7432318584953);NM_005335#(-s-:3_H6432800748138);NM_005335#(-s-:3_H1784039929499);NM_005335#(-s-s-s-:3_H2756191382464);NM_005335#(-s-s-:3_H9868100140547);NM_005335#(-s-s-:3_H617386588406);NM_005335#(-s-:3_H7397979518909);NM_005335#(-s-:3_H1526523985343);NM_005335#(-s-s-s-:3_H5707029130481);N…	NM_005335#(-s-:3_H1761081765109)	yes	no	5	5.0772e-05	81.51	8823400
AALHDPGFPSYCQSLK	K	16	0	1789.85	tr|J3QK86|J3QK86_HUMAN;tr|J3KPG5|J3KPG5_HUMAN;sp|Q9UIF9-2|BAZ2A_HUMAN;sp|Q9UIF9-3|BAZ2A_HUMAN;tr|F8VU39|F8VU39_HUMAN;NM_013449#(-s-:12_B7852090183859);NM_013449#(-t:12_B6143381644981);sp|Q9UIF9|BAZ2A_HUMAN;NM_013449#(r:12_B7719697894172);NM_013449#(-s-:12_B6208766743001)	tr|J3QK86|J3QK86_HUMAN	yes	no	3	4.9865e-05	55.011	28413000
AALHLYSNTLNFQISEVEPK	R	20	0	2273.17	sp|P41227|NAA10_HUMAN;NM_003491#(-s-:X_A7286293095764);tr|F8W808|F8W808_HUMAN;tr|A8MWP7|A8MWP7_HUMAN;tr|C9JW55|C9JW55_HUMAN	sp|P41227|NAA10_HUMAN	yes	no	2,3,4	2.0996e-69	188.41	368190000
AALHPPALAVLSHTPDGATQTIAWVGK	K	27	0	2721.46	sp|Q8NDH3-5|PEPL1_HUMAN;sp|Q8NDH3-4|PEPL1_HUMAN;sp|Q8NDH3|PEPL1_HUMAN;NM_024663#(r:20_N3295320519813);sp|Q8NDH3-2|PEPL1_HUMAN;sp|Q8NDH3-3|PEPL1_HUMAN;tr|H0YEP3|H0YEP3_HUMAN	sp|Q8NDH3-5|PEPL1_HUMAN	yes	no	4	1.5701e-10	72.316	66912000
AALHTTPDSPAAQLERAEDGSECDPDQEEEEEEEEK	M	36	1	4040.68	sp|A6NFI3|ZN316_HUMAN	sp|A6NFI3|ZN316_HUMAN	yes	yes	6	0.091378	0.020718	1928400
AALIEVGEGVNLSTIPR	K	17	0	1737.96	sp|Q86V59-2|PNML1_HUMAN;sp|Q86V59|PNML1_HUMAN	sp|Q86V59-2|PNML1_HUMAN	yes	no	2,3	2.6502e-05	60.489	786700
AALIMQVLQLTADQIAMLPPEQR	K	23	0	2549.37	sp|P33240-2|CSTF2_HUMAN;sp|P33240|CSTF2_HUMAN;NM_001325#(-s-:X_C5817056778454);NM_001325#(-s-:X_C191250849173);tr|E7EWR4|E7EWR4_HUMAN;NM_001325#(-s-s-s-:X_C2898693777095);NM_001325#(-s-s-:X_C8356338891002);NM_001325#(-s-s-:X_C8266604912500);NM_001325#(-s-s-s-s-s-:X_C6839430782113);NM_001325#(f-:X_C2980862581008);NM_001325#(-s-s-s-s-s-s-:X_C7394998502892);NM_001325#(-s-s-s-:X_C9478783261162);NM_00…	sp|P33240-2|CSTF2_HUMAN	no	no	3	0.00034373	51.876	4413700
AALIYTCTVCR	K	11	0	1326.64	sp|Q9Y5V0|ZN706_HUMAN;tr|E5RHV4|E5RHV4_HUMAN;tr|H0YAP1|H0YAP1_HUMAN;tr|E5RHR6|E5RHR6_HUMAN	sp|Q9Y5V0|ZN706_HUMAN	yes	no	2	4.9727e-05	99.283	63105000
AALLAELALLEPEALR	R	16	0	1691.98	sp|Q3KQV9|UAP1L_HUMAN	sp|Q3KQV9|UAP1L_HUMAN	yes	yes	2,3	9.0042e-25	138.73	310120000
AALLDQALSNAR	K	12	0	1241.67	tr|H3BPE1|H3BPE1_HUMAN;tr|H3BQK9|H3BQK9_HUMAN;NM_012090#(-s-s-s-s-:1_M352374647963);NM_012090#(-s-s-s-:1_M1053685127607);NM_012090#(-s-s-:1_M4038445225109);NM_012090#(-s-:1_M2436073315075);sp|Q9UPN3-3|MACF1_HUMAN	tr|H3BPE1|H3BPE1_HUMAN	no	no	2	1.0447e-07	122.7	198310000
AALLDQIR	K	8	0	898.524	sp|O00401|WASL_HUMAN;NM_003941#(-t:7_W6221507359268);NM_003941#(-s-:7_W4172300121843);NM_003941#(f-T:7_W5460252698570);NM_003941#(-s-:7_W2911829936893);NM_003941#(-s-s-:7_W4622717392088);NM_003941#(-s-:7_W3558689191356);NM_003941#(-s-s-s-s-:7_W7182359042505);NM_003941#(-s-s-s-:7_W5519932919384);NM_003941#(-s-s-s-s-s-s-:7_W4045060738877);NM_003941#(-s-s-s-:7_W7527784845912);NM_003941#(-s-s-s-s-:7_…	sp|O00401|WASL_HUMAN	no	no	2	0.0035125	110.31	301520000
AALLEAGMPECTEDK	R	15	0	1633.73	sp|Q9C0C9|UBE2O_HUMAN;NM_022066#(r:17_U6298178066078);tr|K7ES11|K7ES11_HUMAN	sp|Q9C0C9|UBE2O_HUMAN	yes	no	2	2.1129e-19	130.47	264560000
AALLEFEERER	K	11	1	1361.69	sp|Q96EV2|RBM33_HUMAN;tr|H0Y3K4|H0Y3K4_HUMAN;tr|H7C0H2|H7C0H2_HUMAN;tr|H7BXM6|H7BXM6_HUMAN	sp|Q96EV2|RBM33_HUMAN	yes	no	3	1.2794e-05	114.86	6623400
AALLELTGAVDYAAIPR	K	17	0	1742.96	sp|Q8ND90|PNMA1_HUMAN	sp|Q8ND90|PNMA1_HUMAN	yes	yes	3	0.028432	24.918	2502600
AALLELWELR	R	10	0	1212.69	sp|Q13813-2|SPTN1_HUMAN;tr|A6NG51|A6NG51_HUMAN;NM_001130438#(f-T:9_S7052636956660);NM_001130438#(-s-:9_S8619359514920);NM_001130438#(-s-s-:9_S5660456354964);NM_001130438#(-s-s-:9_S3927038404637);NM_001130438#(-s-s-s-:9_S5184587581911);NM_001130438#(-t:9_S7763351271622);NM_001130438#(-s-s-:9_S4867333940718);NM_001130438#(-s-:9_S1368467321877);NM_001130438#(-s-:9_S3254443258005);NM_001130438#(-s-s-…	sp|Q13813-2|SPTN1_HUMAN	no	no	2,3	4.1479e-08	163.88	1039300000
AALLELWELRR	R	11	1	1368.79	sp|Q13813-2|SPTN1_HUMAN;tr|A6NG51|A6NG51_HUMAN;NM_001130438#(f-T:9_S7052636956660);NM_001130438#(-s-:9_S8619359514920);NM_001130438#(-s-s-:9_S5660456354964);NM_001130438#(-s-s-:9_S3927038404637);NM_001130438#(-s-s-s-:9_S5184587581911);NM_001130438#(-t:9_S7763351271622);NM_001130438#(-s-s-:9_S4867333940718);NM_001130438#(-s-:9_S1368467321877);NM_001130438#(-s-:9_S3254443258005);NM_001130438#(-s-s-…	sp|Q13813-2|SPTN1_HUMAN	no	no	3	3.1037e-06	118.28	7043400
AALLETLSLLLAK	K	13	0	1354.84	sp|Q92616|GCN1L_HUMAN;NM_006836#(f-T:12_G5669865150165);NM_006836#(f-:12_G9314862352880);NM_006836#(-t:12_G1135351849413);NM_006836#(r:12_G892825152677);NM_006836#(-s-:12_G69393095546)	sp|Q92616|GCN1L_HUMAN	no	no	2,3	1.7946e-19	199.82	319780000
AALLHGETR	R	9	0	966.525	NM_006413#(f-:10_R2187110067098);NM_001104546#(f-:10_R2187110067098);sp|P78346|RPP30_HUMAN;sp|P78346-2|RPP30_HUMAN;tr|Q5VU10|Q5VU10_HUMAN	NM_006413#(f-:10_R2187110067098)	yes	no	2,3	0.0010008	101.65	133610000
AALLNFDEFAVSK	K	13	0	1423.73	sp|Q9Y613|FHOD1_HUMAN;NM_013241#(f-T:16_F8183999000131);NM_013241#(-t:16_F5247449815671);NM_013241#(r:16_F6350644298306);NM_013241#(f-:16_F2844042521287);NM_013241#(r:16_F4870521132670);NM_013241#(r:16_F8491021181448);NM_013241#(r:16_F2845651341693);NM_013241#(r:16_F7290638783118);tr|B4DVN5|B4DVN5_HUMAN;NM_013241#(-s-:16_F7297792130889);tr|J3KTH7|J3KTH7_HUMAN	sp|Q9Y613|FHOD1_HUMAN	yes	no	2	2.1927e-06	85.536	572840000
AALLNQHYQVNFK	K	13	0	1544.81	NM_004446#(-s-:1_E4814869076632);sp|P07814|SYEP_HUMAN;NM_004446#(-t:1_E6537522061332);NM_004446#(f-T:1_E6726018784936);NM_004446#(f-:1_E8056113028154)	sp|P07814|SYEP_HUMAN	no	no	2,3,4	3.9183e-19	185.77	1417300000
AALLSGPPGVGK	K	12	0	1065.62	NM_002913#(-s-:4_R3702454106941);NM_002913#(-t:4_R8498984949233);sp|P35251-2|RFC1_HUMAN;sp|P35251|RFC1_HUMAN;NM_002913#(-s-:4_R2264812145293);NM_002913#(-t:4_R6952248213025);NM_002913#(-s-:4_R7779804526243);NM_002913#(-s-s-:4_R5622496401854);NM_002913#(-s-:4_R3640800492160);NM_002913#(-s-s-:4_R6028398531588);NM_002913#(-t:4_R4226897567777);NM_002913#(-s-s-:4_R7377537429753);NM_002913#(-s-s-s-:4_R…	NM_002913#(-t:4_R8498984949233)	no	no	2	0.0024147	57.175	215330000
AALLSPGDPAIWAGLMAACHADDK	K	24	0	2450.17	NM_014639#(-s-s-s-s-s-:5_T5539983499040);NM_014639#(-s-s-s-s-s-:5_T7986186738278);NM_014639#(-s-s-s-s-:5_T9593580798883);NM_014639#(-s-s-s-:5_T4205081180078);NM_014639#(-s-s-s-:5_T6718236718761);NM_014639#(-s-s-:5_T1340335304206);NM_014639#(-s-s-:5_T7609532640096);NM_014639#(-s-s-:5_T5837426172185);NM_014639#(-s-:5_T5047863973496);NM_014639#(-s-:5_T6618035201395);NM_014639#(f-:5_T9975412465165);N…	NM_014639#(-s-s-s-s-s-:5_T5539983499040)	yes	no	3	3.2163e-22	103.75	101820000
AALLTER	R	7	0	772.444	sp|Q9Y5B9|SP16H_HUMAN;NM_007192#(-s-:14_S2655773662227);NM_007192#(-s-:14_S6234886541315)	sp|Q9Y5B9|SP16H_HUMAN	yes	no	2	0.0051782	146.94	441900000
AALLVTTRPR	K	10	1	1096.67	sp|Q9NX02-5|NALP2_HUMAN;sp|Q9NX02-2|NALP2_HUMAN;tr|J3KN39|J3KN39_HUMAN;sp|Q9NX02|NALP2_HUMAN;sp|Q9NX02-4|NALP2_HUMAN;NM_017852#(-s-:19_N3280770727682);NM_017852#(f-:19_N7478420361752);sp|Q9NX02-3|NALP2_HUMAN;NM_017852#(r:19_N5196879691971)	sp|Q9NX02-5|NALP2_HUMAN	no	no	3	0.057997	42.718	183700
AALLWALAAALER	R	13	0	1367.79	sp|Q8IZ83|A16A1_HUMAN;sp|Q8IZ83-3|A16A1_HUMAN;NM_153329#(-t:19_A4868464989762);NM_153329#(f-:19_A6068151724325);NM_153329#(f-T:19_A5619034164856);tr|F8WBH3|F8WBH3_HUMAN;tr|F5H4B6|F5H4B6_HUMAN;NM_153329#(-s-s-:19_A1183664022827)	sp|Q8IZ83|A16A1_HUMAN	yes	no	3	0.0061579	37.613	437210
AALLYASSHSTLSSR	R	15	0	1562.81	NM_018025#(f-t:19_G9070854083414);NM_018025#(-t:19_G5904432510769);NM_018025#(f-:19_G7197913100214);sp|Q9BRR8|GPTC1_HUMAN	NM_018025#(f-t:19_G9070854083414)	yes	no	3	6.124e-07	76.759	322110
AALMDASQLEPGEK	R	14	0	1458.7	NM_032383#(f-:3_H7623528997255);NM_032383#(-t:3_H860869920936);sp|Q969F9|HPS3_HUMAN;NM_032383#(-t:3_H9940465321400);tr|G5E9V4|G5E9V4_HUMAN;sp|Q969F9-2|HPS3_HUMAN	NM_032383#(f-:3_H7623528997255)	yes	no	2	0.00040725	56.569	7209900
AALMTPGTGAPPAPGDFSGEGSQGLPDPSPEPK	M	33	0	3132.47	sp|P19971|TYPH_HUMAN;tr|C9JGI3|C9JGI3_HUMAN;sp|P19971-2|TYPH_HUMAN;NM_001113756#(-s-:22_T6513843502514)	sp|P19971|TYPH_HUMAN	yes	no	3	4.5153e-11	82.413	6778200
AALNALQPPEFR	K	12	0	1325.71	sp|Q3ZAQ7|VMA21_HUMAN	sp|Q3ZAQ7|VMA21_HUMAN	yes	yes	2,3	9.0332e-16	163.12	857600000
AALNAVR	R	7	0	713.418	sp|O14745|NHRF1_HUMAN;NM_004252#(-s-:17_S7715740241787);NM_004252#(-s-:17_S1416907431488);NM_004252#(-s-s-:17_S3769232724912);NM_004252#(-s-s-s-:17_S6903803372815);NM_004252#(-s-:17_S4264806927888);tr|J3QRP6|J3QRP6_HUMAN;NM_004252#(-s-s-:17_S4684586583894)	sp|O14745|NHRF1_HUMAN	yes	no	2	0.0064969	122.15	225780000
AALNELLK	K	8	0	870.517	NM_014639#(-s-s-s-s-s-:5_T5539983499040);NM_014639#(-s-s-s-s-s-:5_T7986186738278);NM_014639#(-s-s-s-s-:5_T9593580798883);NM_014639#(-s-s-s-:5_T4205081180078);NM_014639#(-s-s-s-:5_T6718236718761);NM_014639#(-s-s-:5_T1340335304206);NM_014639#(-s-s-:5_T7609532640096);NM_014639#(-s-s-:5_T5837426172185);NM_014639#(-s-:5_T5047863973496);NM_014639#(-s-:5_T6618035201395);NM_014639#(f-:5_T9975412465165);N…	NM_014639#(-s-s-s-s-s-:5_T5539983499040)	yes	no	2	0.010373	69.825	44563000
AALNGADIYAGCCTLK	K	16	0	1696.79	sp|Q8WVV9-4|HNRLL_HUMAN;tr|D6W592|D6W592_HUMAN;sp|Q8WVV9|HNRLL_HUMAN;NM_138394#(-s-:2_H4680856619362);NM_138394#(r:2_H1377246221680);sp|Q8WVV9-3|HNRLL_HUMAN;tr|C9IYN3|C9IYN3_HUMAN;sp|Q8WVV9-2|HNRLL_HUMAN;NM_138394#(r:2_H9720816018836);tr|H7BXH8|H7BXH8_HUMAN	sp|Q8WVV9-4|HNRLL_HUMAN	yes	no	2	1.3664e-23	132.84	165180000
AALNLPEAASYDEVR	R	15	0	1617.8	sp|O95602|RPA1_HUMAN;tr|B9ZVN9|B9ZVN9_HUMAN;NM_015425#(-s-:2_P5857213867777);NM_015425#(-s-:2_P6704905772782);NM_015425#(-s-:2_P2584016676420);NM_015425#(-s-:2_P3249625866602);NM_015425#(-s-s-:2_P2824257168371)	sp|O95602|RPA1_HUMAN	yes	no	2	3.1735e-15	124.62	352610000
AALNPEIVSVIPNAVDPTDFTPDPFR	R	26	0	2794.42	sp|P37287|PIGA_HUMAN;NM_002641#(r:X_P2497514110099)	sp|P37287|PIGA_HUMAN	yes	no	3	1.8145e-07	61.039	10155000
AALPAHSFVCSLSLK	K	15	0	1599.84	sp|O14772|FPGT_HUMAN;NM_003838#(r:1_F3096518180561);NM_003838#(f-:1_F391035203600);sp|O14772-2|FPGT_HUMAN	sp|O14772|FPGT_HUMAN	yes	no	3	1.6245e-11	98.676	452370
AALPDLTK	K	8	0	827.475	sp|Q13217|DNJC3_HUMAN;NM_006260#(r:13_D9407770847146);NM_006260#(f-T:13_D8511045701032);NM_006260#(f-:13_D2698760185759);NM_006260#(-t:13_D7713211081587)	sp|Q13217|DNJC3_HUMAN	yes	no	2	0.0071397	77.732	229350000
AALPEGLPEASR	R	12	0	1209.64	sp|Q99988|GDF15_HUMAN	sp|Q99988|GDF15_HUMAN	yes	yes	2	6.9642e-05	78.324	564450000
AALPGLDVLIYLK	R	13	0	1384.83	sp|P78316|NOP14_HUMAN;NM_003703#(f-:4_N5890199077418);tr|E9PFK5|E9PFK5_HUMAN;sp|P78316-2|NOP14_HUMAN;NM_003703#(f-S-:4_N4112952044395);NM_003703#(f-S-T:4_N1738229681623)	sp|P78316|NOP14_HUMAN	yes	no	2,3	2.0137e-07	96.745	13842000
AALPLTTSDTK	K	11	0	1116.6	NM_031407#(-s-s-s-s-s-s-s-:X_H1670042632806);NM_031407#(-s-s-s-s-s-s-s-s-:X_H6434022303756);NM_031407#(-s-s-s-:X_H5042568661139);NM_031407#(-s-:X_H8859769001091);NM_031407#(-s-s-s-s-:X_H5660308344712);NM_031407#(-s-s-s-s-s-:X_H3045231135783);NM_031407#(-s-:X_H3854286165320);NM_031407#(-s-s-s-:X_H33798549115);NM_031407#(-s-:X_H4359841200375);NM_031407#(-s-s-:X_H7127981684908);NM_031407#(-s-:X_H810…	sp|Q7Z6Z7-2|HUWE1_HUMAN	no	no	2	8.0991e-05	96.229	104560000
AALPSHVVTMLDNFPTNLHPMSQLSAAVTALNSESNFAR	R	39	0	4151.06	NM_004077#(-s-:12_C2631804832681);tr|B4DJV2|B4DJV2_HUMAN;NM_004077#(f-:12_C5178015993019);sp|O75390|CISY_HUMAN;NM_004077#(-s-s-:12_C4274784046014);NM_198324#(f-:12_C5178015993019);NM_198324#(-s-:12_C7929410023938);NM_004077#(-s-s-:12_C7742650718916);NM_004077#(-s-:12_C4527911383221);NM_004077#(-s-:12_C7929410023938);NM_004077#(-t:12_C3026490626855);NM_198324#(-s-e-e-s-:12_C1358399864888);NM_19832…	NM_004077#(-s-:12_C2631804832681)	yes	no	4,5	7.2422e-55	112.36	134590000
AALPSLTNPPSLSPIR	K	16	0	1632.92	sp|P42858|HD_HUMAN	sp|P42858|HD_HUMAN	yes	yes	2,3	3.5005e-13	93.106	77892000
AALPTPALSPEDK	R	13	0	1308.69	tr|B4DST5|B4DST5_HUMAN;NM_015466#(r:3_P400061306455);sp|Q9H3S7|PTN23_HUMAN;NM_015466#(r:3_P279131350651);NM_015466#(r:3_P6904046537454);NM_015466#(r:3_P7446021686347)	sp|Q9H3S7|PTN23_HUMAN	no	no	2	0.00017633	66.989	115510000
AALQALK	R	7	0	713.444	sp|Q9H444|CHM4B_HUMAN;NM_176812#(-t:20_C310741138993);NM_176812#(f-t:20_C6794386241470);NM_176812#(f-:20_C8782925209286);sp|Q96CF2|CHM4C_HUMAN	sp|Q9H444|CHM4B_HUMAN	no	no	2	0.02614	76.847	289220000
AALQALR	R	7	0	741.45	sp|Q9BY43|CHM4A_HUMAN;tr|Q14D22|Q14D22_HUMAN;tr|H0YI46|H0YI46_HUMAN;tr|E9PQ80|E9PQ80_HUMAN;tr|E9PQI5|E9PQI5_HUMAN;NM_014169#(-s-:14_C5493222474995)	sp|Q9BY43|CHM4A_HUMAN	no	no	2	0.015172	94.163	106880000
AALQEELQLCK	R	11	0	1301.66	NM_004104#(-s-s-s-s-s-:17_F5865559025869);NM_004104#(r:17_F6931335426640);NM_004104#(r:17_F7114973120097);sp|P49327|FAS_HUMAN;NM_004104#(f-:17_F1077701467315);NM_004104#(-s-:17_F2914674533955);NM_004104#(-s-:17_F2955763659391);NM_004104#(-t:17_F8810097319914);NM_004104#(-s-s-:17_F3338822613971);NM_004104#(f-:17_F8465271853650);NM_004104#(-s-:17_F3214771148080);NM_004104#(r:17_F8997999164453);NM_0…	sp|P49327|FAS_HUMAN	no	no	2,3	2.0039e-06	118.28	3775200000
AALQEGHQFLCSIEA	K	15	0	1672.79	sp|P50583|AP4A_HUMAN	sp|P50583|AP4A_HUMAN	yes	yes	2,3	3.9995e-06	70.373	341730000
AALQELLSK	R	9	0	971.565	sp|P62851|RS25_HUMAN;NM_001028#(-s-:11_R1070436327982);NM_001028#(r:11_R8003986835436);NM_001028#(-s-:11_R5763276395159);NM_001028#(-t:11_R3255196538554)	sp|P62851|RS25_HUMAN	yes	no	2	0.00014917	125.57	14583000000
AALQELLSKGLIK	R	13	1	1382.85	sp|P62851|RS25_HUMAN;NM_001028#(-s-:11_R1070436327982);NM_001028#(r:11_R8003986835436)	sp|P62851|RS25_HUMAN	yes	no	3	0.00097975	67.118	3767800
AALQELTR	K	8	0	900.503	sp|Q9H9Y6|RPA2_HUMAN;tr|F5GZX4|F5GZX4_HUMAN;sp|Q9H9Y6-2|RPA2_HUMAN;tr|F8W898|F8W898_HUMAN;NM_019014#(f-:2_P3596543079692);NM_019014#(-t:2_P9925708460070);NM_019014#(f-T:2_P8560137592393);tr|C9JJG2|C9JJG2_HUMAN;tr|C9JS83|C9JS83_HUMAN;tr|F8WDS4|F8WDS4_HUMAN;tr|F8WAK7|F8WAK7_HUMAN;tr|F8WBB9|F8WBB9_HUMAN;tr|F8WCS3|F8WCS3_HUMAN	sp|Q9H9Y6|RPA2_HUMAN	yes	no	2	0.047767	69.812	23037000
AALQILKPEEHMYLK	K	15	1	1782.97	sp|O60287|NPA1P_HUMAN	sp|O60287|NPA1P_HUMAN	yes	yes	3,4	2.3088e-05	77.776	84774000
AALQLVVDPGDPR	R	13	0	1349.73	sp|O96013|PAK4_HUMAN;NM_001014832#(f-:19_P5223880664365);sp|O96013-4|PAK4_HUMAN;sp|O96013-3|PAK4_HUMAN;NM_001014834#(f-:19_P5223880664365);sp|O96013-2|PAK4_HUMAN	sp|O96013|PAK4_HUMAN	yes	no	2,3	2.3545e-05	73.881	25308000
AALQMQFNAAER	R	12	0	1348.66	sp|Q8WX93-3|PALLD_HUMAN;sp|Q8WX93|PALLD_HUMAN;sp|Q8WX93-8|PALLD_HUMAN;sp|Q8WX93-5|PALLD_HUMAN;NM_016081#(-s-:4_P3128563438218);sp|Q8WX93-2|PALLD_HUMAN;NM_016081#(-s-:4_P9493649436072);sp|Q8WX93-9|PALLD_HUMAN;NM_016081#(-s-:4_P2097591892866);NM_016081#(-s-:4_P2523197596441);NM_016081#(-s-s-:4_P4230792945903);NM_016081#(-s-:4_P5719523814733);NM_016081#(-s-s-s-:4_P8390941938574);NM_016081#(-s-:4_P92…	sp|Q8WX93-3|PALLD_HUMAN	no	no	2	1.5321e-13	88.803	7892800
AALQSQAEALR	R	11	0	1156.62	sp|Q8WZA9|IRGQ_HUMAN	sp|Q8WZA9|IRGQ_HUMAN	yes	yes	2	7.9143e-06	114.86	165450000
AALQTAYVEVQR	R	12	0	1347.71	sp|Q9H2Y7|ZN106_HUMAN;tr|E9PE29|E9PE29_HUMAN;tr|H3BS99|H3BS99_HUMAN	sp|Q9H2Y7|ZN106_HUMAN	yes	no	2	0.0020046	52.391	80353000
AALQVEEESWNAYPYTR	K	17	0	2025.94	NM_001130848#(-t:11_P4769304312745);NM_004910#(-t:11_P4769304312745);NM_001130848#(-s-s-:11_P1766227304296);NM_004910#(-s-s-:11_P1766227304296);NM_001130848#(-s-s-s-s-:11_P4112906892452);NM_004910#(-s-s-s-s-:11_P4112906892452);NM_001130848#(-s-:11_P2553689925005);NM_004910#(-s-:11_P2553689925005);NM_001130848#(-s-s-s-:11_P804781624151);NM_001130848#(-s-s-s-:11_P2781906999988);NM_004910#(-s-s-s-:1…	NM_001130848#(-t:11_P4769304312745)	yes	no	3	0.00035335	40.493	1997000
AALRPLVK	M	8	1	866.57	tr|D3YTB1|D3YTB1_HUMAN;sp|P62910|RL32_HUMAN;tr|F8W727|F8W727_HUMAN;NM_001007073#(f-:3_R4393235870795);NM_001007073#(f-:3_R6821710086029);tr|D3YTI8|D3YTI8_HUMAN	tr|D3YTB1|D3YTB1_HUMAN	yes	no	2	0.0026086	119.17	811480000
AALRPLVKPK	M	10	2	1091.72	tr|D3YTB1|D3YTB1_HUMAN;sp|P62910|RL32_HUMAN;tr|F8W727|F8W727_HUMAN;NM_001007073#(f-:3_R4393235870795);NM_001007073#(f-:3_R6821710086029);tr|D3YTI8|D3YTI8_HUMAN	tr|D3YTB1|D3YTB1_HUMAN	yes	no	2,3	0.0024315	86.898	738610000
AALRPTDVVLEVGPGTGNMTVK	K	22	1	2224.19	sp|Q9UNQ2|DIM1_HUMAN;tr|D6RCL3|D6RCL3_HUMAN;NM_014473#(-t:5_D3382523807903)	sp|Q9UNQ2|DIM1_HUMAN	yes	no	3,4	2.7598e-07	89.721	521600000
AALSALESFLK	K	11	0	1148.64	sp|P78527|PRKDC_HUMAN;tr|E7EUY0|E7EUY0_HUMAN;sp|P78527-2|PRKDC_HUMAN	sp|P78527|PRKDC_HUMAN	yes	no	2,3	2.3907e-06	120.77	2656000000
AALSASEGEEVPQDK	K	15	0	1529.72	NM_145812#(f-t:X_A8260283212121);sp|O95831-3|AIFM1_HUMAN;NM_004208#(f-t:X_A8260283212121);sp|O95831|AIFM1_HUMAN;NM_145812#(-t:X_A1273343005160);NM_004208#(-t:X_A1273343005160);NM_145812#(-t:X_A7629134870019);NM_004208#(-t:X_A7629134870019);NM_145812#(f-t:X_A187255944095);NM_004208#(f-t:X_A187255944095);NM_145813#(-s-s-s-:X_A6172431267632);NM_145813#(-s-s-s-s-:X_A1375487823874);NM_145812#(f-:X_A59…	NM_145812#(f-t:X_A8260283212121)	yes	no	2	8.4349e-32	176	647330000
AALSASEGEEVPQDKAPSHVPFLLIGGGTAAFAAAR	K	36	1	3534.81	NM_145812#(f-t:X_A8260283212121);sp|O95831-3|AIFM1_HUMAN;NM_004208#(f-t:X_A8260283212121);sp|O95831|AIFM1_HUMAN;NM_145812#(-t:X_A1273343005160);NM_004208#(-t:X_A1273343005160);NM_145812#(-t:X_A7629134870019);NM_004208#(-t:X_A7629134870019);NM_145812#(f-t:X_A187255944095);NM_004208#(f-t:X_A187255944095);NM_145813#(-s-s-s-:X_A6172431267632);NM_145813#(-s-s-s-s-:X_A1375487823874);NM_145812#(f-:X_A59…	NM_145812#(f-t:X_A8260283212121)	yes	no	4	2.7483e-72	161.61	8217000
AALSEEELER	K	10	0	1145.56	NM_003760#(f-T:1_E7896573804643);sp|O43432|IF4G3_HUMAN;sp|O43432-3|IF4G3_HUMAN;NM_003760#(-s-:1_E7159044093560);NM_003760#(-t:1_E5351713909840);NM_003760#(f-:1_E3404521621997);NM_003760#(f-T:1_E3570704596325);NM_003760#(f-:1_E6632587670129);NM_003760#(-t:1_E4504231892833);tr|F5H564|F5H564_HUMAN;tr|Q504Z1|Q504Z1_HUMAN;NM_003760#(-s-:1_E595494678725);tr|F5H8J4|F5H8J4_HUMAN;NM_003760#(f-T:1_E2332159…	NM_003760#(f-T:1_E7896573804643)	yes	no	2	2.3258e-05	113.93	29201000
AALSEEELERK	K	11	1	1273.65	NM_003760#(f-T:1_E7896573804643);sp|O43432|IF4G3_HUMAN;sp|O43432-3|IF4G3_HUMAN;NM_003760#(-s-:1_E7159044093560);NM_003760#(-t:1_E5351713909840);NM_003760#(f-:1_E3404521621997);NM_003760#(f-T:1_E3570704596325);NM_003760#(f-:1_E6632587670129);NM_003760#(-t:1_E4504231892833);tr|F5H564|F5H564_HUMAN;tr|Q504Z1|Q504Z1_HUMAN;NM_003760#(-s-:1_E595494678725);tr|F5H8J4|F5H8J4_HUMAN;NM_003760#(f-T:1_E2332159…	NM_003760#(f-T:1_E7896573804643)	yes	no	3	0.00069315	64.266	8384600
AALSEMVEYITHNR	R	14	0	1632.79	NM_178586#(-t:14_P9879555730554);NM_002719#(-s-:14_P7021969161049);NM_178587#(-s-:14_P1619080032864);sp|Q13362-2|2A5G_HUMAN;NM_178586#(-s-:14_P1619080032864);NM_178586#(-s-:14_P7021969161049);sp|Q13362-3|2A5G_HUMAN;NM_002719#(-s-:14_P1619080032864);sp|Q13362|2A5G_HUMAN;sp|Q13362-4|2A5G_HUMAN;tr|H0YJ75|H0YJ75_HUMAN;tr|F5GWP3|F5GWP3_HUMAN;NM_178587#(-s-:14_P2610379370863);NM_178587#(-s-:14_P1249092…	NM_178586#(-t:14_P9879555730554)	yes	no	2,3	3.0115e-13	125.29	295030000
AALSGANVLTLIEK	R	14	0	1398.81	sp|Q07954|LRP1_HUMAN;NM_002332#(r:12_L9341383782399);NM_002332#(-s-:12_L7559471206006);tr|H0YJI8|H0YJI8_HUMAN	sp|Q07954|LRP1_HUMAN	yes	no	2	0.04919	29.129	1359600
AALSGSYVNFGVFR	K	14	0	1486.76	sp|Q9UIA9|XPO7_HUMAN;NM_015024#(f-T:8_X4518532708786);tr|E9PEN8|E9PEN8_HUMAN;NM_001100161#(f-T:8_X4518532708786);NM_015024#(f-:8_X9345611350695);tr|E7ESC6|E7ESC6_HUMAN;NM_001100162#(f-T:8_X4518532708786);NM_001100161#(f-:8_X9345611350695);NM_001100162#(f-:8_X9345611350695);NM_015024#(-t-e-e-f-:8_X8261274493738);NM_015024#(-s-:8_X2741045607285)	sp|Q9UIA9|XPO7_HUMAN	no	no	2	2.989e-08	102.97	111750000
AALSHSGSPGVVPEGNGTFLDDTHNVSEWR	R	30	0	3135.46	NM_018156#(f-:1_V9536053848088);sp|Q5THJ4-2|VP13D_HUMAN;NM_015378#(f-:1_V9536053848088);sp|Q5THJ4|VP13D_HUMAN;tr|J3KP14|J3KP14_HUMAN;NM_018156#(f-t:1_V5288774537041);NM_018156#(-t:1_V7082015739141);NM_015378#(f-t:1_V5288774537041);NM_015378#(-t:1_V7082015739141);tr|H3BLS7|H3BLS7_HUMAN	NM_018156#(f-:1_V9536053848088)	yes	no	4	4.3161e-14	78.913	1548400
AALSLPAK	K	8	0	769.47	sp|Q14978-2|NOLC1_HUMAN;NM_004741#(-t-e-e-f-:10_N6929983250248);sp|Q14978|NOLC1_HUMAN;sp|Q14978-3|NOLC1_HUMAN;NM_004741#(f-:10_N1160295541390);NM_004741#(-s-:10_N1783412506962);NM_004741#(-s-s-:10_N9906250713433);NM_004741#(-s-:10_N8207649535093);NM_004741#(-s-s-s-:10_N1168070287722);NM_004741#(-s-s-:10_N5279417602160);NM_004741#(-s-s-s-s-:10_N9009280425216);NM_004741#(-s-:10_N27708844615);NM_004…	sp|Q14978-2|NOLC1_HUMAN	yes	no	2	0.0083611	75.761	689310000
AALSSFQK	K	8	0	850.455	NM_004236#(f-:15_C5604362818521);NM_004236#(f-:15_C5033592560118);sp|P61201|CSN2_HUMAN;NM_004236#(f-e-e-e-T:15_C4860450486457);sp|P61201-2|CSN2_HUMAN;tr|H0YKU5|H0YKU5_HUMAN;NM_004236#(f-:15_C723331219017)	NM_004236#(f-:15_C5604362818521)	yes	no	2	0.0039166	107.9	91470000
AALSSQQQQQLALLLQQFQTLK	K	22	0	2484.37	sp|Q6Y7W6-4|PERQ2_HUMAN;NM_001103148#(-t:2_G1434228085054);NM_015575#(-t:2_G1434228085054);sp|Q6Y7W6|PERQ2_HUMAN;tr|I1E4Y6|I1E4Y6_HUMAN;NM_001103148#(f-T:2_G9660850217651);NM_015575#(f-T:2_G9660850217651);NM_001103147#(-t:2_G1434228085054);sp|Q6Y7W6-3|PERQ2_HUMAN;NM_001103148#(r:2_G7593933829005);NM_015575#(r:2_G7593933829005);NM_001103148#(-t:2_G4163523102190);NM_015575#(-t:2_G4163523102190);NM_…	sp|Q6Y7W6-4|PERQ2_HUMAN	yes	no	3	1.1189e-31	112.57	45139000
AALSSSELLELGDSLMR	R	17	0	1790.91	NM_019004#(f-:7_A3450712016163);NM_019004#(-t:7_A2988792552844);NM_019004#(-t:7_A9811670024893);sp|Q9P2G1|AKIB1_HUMAN;NM_019004#(-s-:7_A5297461425518);NM_019004#(f-T:7_A5955998541731)	NM_019004#(f-:7_A3450712016163)	yes	no	3	6.501e-18	106.82	890820
AALTAEHFAALQSLLK	M	16	0	1682.94	sp|Q9P000|COMD9_HUMAN;NM_014186#(r:11_C598294341354);sp|Q9P000-2|COMD9_HUMAN;NM_001101653#(r:11_C598294341354);NM_001101653#(-s-e-e-S-:11_C1891754887732);NM_014186#(-s-s-:11_C6715740554920);tr|E9PJ95|E9PJ95_HUMAN;NM_001101653#(-s-e-S-:11_C9175275872332);NM_014186#(-s-s-s-:11_C9730218667181);NM_001101653#(-s-:11_C5532802956361);NM_001101653#(-s-s-:11_C6715740554920);NM_001101653#(-s-:11_C826324966…	sp|Q9P000|COMD9_HUMAN	yes	no	2,3	4.3037e-42	188.47	737480000
AALTFLQDENMVSFIK	R	16	0	1825.93	tr|D3DQ30|D3DQ30_HUMAN;tr|E7EQY9|E7EQY9_HUMAN;tr|G3XAF8|G3XAF8_HUMAN;sp|Q5SRH9-4|TT39A_HUMAN;NM_001080494#(-s-:1_T9135151359095);tr|E9PAZ4|E9PAZ4_HUMAN	tr|D3DQ30|D3DQ30_HUMAN	yes	no	2,3	8.7425e-14	96.489	4416700
AALTFVQDENMINFIK	K	16	0	1852.94	tr|G5E9Y5|G5E9Y5_HUMAN;sp|Q5VTQ0-2|TT39B_HUMAN;sp|Q5VTQ0-3|TT39B_HUMAN;sp|Q5VTQ0-4|TT39B_HUMAN;sp|Q5VTQ0|TT39B_HUMAN;sp|Q5VTQ0-5|TT39B_HUMAN;sp|Q5VTQ0-6|TT39B_HUMAN	tr|G5E9Y5|G5E9Y5_HUMAN	yes	no	2,3	2.0126e-18	110.44	2064800
AALTGLLHR	R	9	0	950.566	sp|P55084|ECHB_HUMAN;tr|B4E2W0|B4E2W0_HUMAN;NM_000183#(f-:2_H8093871954915);NM_000183#(f-T:2_H1224824273802);NM_000183#(f-:2_H3656594664319);NM_000183#(-s-:2_H5333252230574);NM_000183#(-s-:2_H9560604882619);tr|B5MD38|B5MD38_HUMAN;tr|C9JEY0|C9JEY0_HUMAN;tr|C9JE81|C9JE81_HUMAN	sp|P55084|ECHB_HUMAN	yes	no	2,3	1.3394e-05	162.97	3221700000
AALTLTPSAVNK	R	12	0	1184.68	sp|Q9BUE6|ISCA1_HUMAN;tr|B4DJI5|B4DJI5_HUMAN;tr|Q5TBE9|Q5TBE9_HUMAN	sp|Q9BUE6|ISCA1_HUMAN	yes	no	2	2.1004e-05	96.604	41521000
AALTSALSIQNYHLECTETQAWMR	K	24	0	2793.32	sp|O15020|SPTN2_HUMAN;sp|O15020-2|SPTN2_HUMAN;NM_006946#(r:11_S5487932570808)	sp|O15020|SPTN2_HUMAN	yes	no	3	2.1909e-87	187.86	33277000
AALTSAR	R	7	0	688.387	NM_002815#(-s-:17_P8259760552602);NM_002815#(f-:17_P5195293317558);sp|O00231|PSD11_HUMAN;NM_002815#(f-:17_P2401544856256);NM_002815#(-s-:17_P7288876345395);NM_002815#(-s-:17_P7157212417001);NM_002815#(-s-:17_P5793439270032);NM_002815#(-t:17_P2476850584956);sp|O00231-2|PSD11_HUMAN;NM_002815#(-s-:17_P4003747358843);NM_002815#(-s-s-:17_P4966124844762);NM_002815#(-s-:17_P2033595151547);NM_002815#(-s-…	NM_002815#(-s-:17_P8259760552602)	yes	no	2	0.0080457	114.72	121160000
AALTTLFK	M	8	0	863.512	sp|Q96KP4|CNDP2_HUMAN;NM_018235#(-t:18_C8029212219190);NM_018235#(-t:18_C6089854523502);NM_018235#(-t:18_C4434299048137);NM_018235#(-s-:18_C2256033540174);NM_018235#(-t:18_C1064669368608);NM_018235#(-t:18_C2825063480270);sp|Q96KP4-2|CNDP2_HUMAN;NM_018235#(f-:18_C8635782891633);tr|J3QKT2|J3QKT2_HUMAN;tr|J3KSV5|J3KSV5_HUMAN;tr|J3QQN6|J3QQN6_HUMAN;tr|J3QR27|J3QR27_HUMAN;tr|J3QLU1|J3QLU1_HUMAN;tr|J3Q…	sp|Q96KP4|CNDP2_HUMAN	yes	no	2	0.0024663	94.114	702900000
AALTVHQAR	R	9	0	965.541	tr|H3BSM7|H3BSM7_HUMAN;NM_022744#(-t:16_C2298497809172);sp|Q96GQ5|CP058_HUMAN;NM_022744#(-s-:16_C9629632335836);tr|H3BR29|H3BR29_HUMAN;NM_022744#(-s-:16_C279906194913);NM_022744#(-s-:16_C4147462393967);tr|B4DJP2|B4DJP2_HUMAN;NM_022744#(f-T:16_C3037635223486);NM_022744#(f-:16_C8646711155103);tr|I3L2V0|I3L2V0_HUMAN	tr|H3BSM7|H3BSM7_HUMAN	yes	no	2,3	0.003204	73.573	0
AALTYSSGFDHHLGDQSGEK	R	20	0	2118.96	sp|P59923|ZN445_HUMAN	sp|P59923|ZN445_HUMAN	yes	yes	4	0.061628	20.251	2414200
AALVAGMYPNLVHVDR	K	16	0	1724.9	NM_022828#(f-T:5_Y1818872868421);NM_022828#(f-:5_Y2573810778818);sp|Q9H6S0|YTDC2_HUMAN	NM_022828#(f-T:5_Y1818872868421)	yes	no	3	0.00017391	49.223	71804000
AALVAQNYINYQQGTPHR	R	18	0	2043.03	sp|Q9BS40|LXN_HUMAN	sp|Q9BS40|LXN_HUMAN	yes	yes	2,3,4	1.5205e-52	164.93	495070000
AALVDLEPGTMDSVR	R	15	0	1572.78	sp|Q9BUF5|TBB6_HUMAN;tr|K7EL29|K7EL29_HUMAN;NM_032525#(r:18_T1257832113381);tr|K7EN98|K7EN98_HUMAN;tr|K7ESQ3|K7ESQ3_HUMAN;tr|K7EQT3|K7EQT3_HUMAN;tr|K7EJ64|K7EJ64_HUMAN;tr|K7EJZ4|K7EJZ4_HUMAN;tr|K7EPE5|K7EPE5_HUMAN;tr|K7ERA8|K7ERA8_HUMAN	sp|Q9BUF5|TBB6_HUMAN	no	no	2,3	1.8219e-19	133.47	2447100000
AALVDQSGVLLAFADQPIK	R	19	0	1955.07	NM_018291#(-s-:1_F4674583251497);NM_018291#(f-T:1_F5968153689795);NM_018291#(-t:1_F9080933800461);tr|F2Z2V1|F2Z2V1_HUMAN;NM_001113411#(-s-:1_F4674583251497);NM_001113411#(f-T:1_F5968153689795);NM_001113411#(-t:1_F9080933800461);NM_018291#(f-:1_F3984366676099);sp|Q96C11|FGGY_HUMAN;NM_001113411#(f-:1_F3984366676099);sp|Q96C11-3|FGGY_HUMAN;NM_018291#(-s-:1_F8524094960473);NM_001113411#(-s-:1_F852409…	NM_018291#(-s-:1_F4674583251497)	yes	no	2,3	3.7419e-19	98.175	5061300
AALVDYLDGK	K	10	0	1063.56	NM_014639#(-s-s-s-s-s-:5_T5539983499040);NM_014639#(-s-s-s-s-s-:5_T7986186738278);NM_014639#(-s-s-s-s-:5_T9593580798883);NM_014639#(-s-s-s-:5_T4205081180078);NM_014639#(-s-s-s-:5_T6718236718761);NM_014639#(-s-s-:5_T1340335304206);NM_014639#(-s-s-:5_T7609532640096);NM_014639#(-s-s-:5_T5837426172185);NM_014639#(-s-:5_T5047863973496);NM_014639#(-s-:5_T6618035201395);NM_014639#(f-:5_T9975412465165);N…	NM_014639#(-s-s-s-s-s-:5_T5539983499040)	yes	no	2	0.00031474	90.827	676370000
AALVGGTTMIIDHVVPEPGSSLLTSFEK	R	28	0	2868.49	tr|E9PD68|E9PD68_HUMAN;sp|Q14194|DPYL1_HUMAN;sp|Q14194-2|DPYL1_HUMAN;NM_001313#(f-:4_C2844227843527);NM_001313#(-s-:4_C4175726319990);NM_001313#(-s-:4_C7377974788378);NM_001014809#(-s-:4_C4175726319990);NM_001014809#(-s-:4_C7377974788378);NM_001313#(-s-s-:4_C7022032781733);NM_001014809#(-s-s-:4_C7022032781733);NM_001313#(-s-s-:4_C6071225036316);NM_001014809#(-s-s-:4_C6071225036316);NM_001313#(-s-…	tr|E9PD68|E9PD68_HUMAN	no	no	3,4	3.7765e-41	121.72	26417000
AALVGGTTMIIGHVLPDKETSLVDAYEK	K	28	1	2927.53	sp|Q9BPU6|DPYL5_HUMAN;tr|E7EWB4|E7EWB4_HUMAN;tr|E9PHT0|E9PHT0_HUMAN;tr|E7ESV0|E7ESV0_HUMAN	sp|Q9BPU6|DPYL5_HUMAN	yes	no	3,4	6.1922e-16	102.39	43353000
AALVHSDDEVFER	K	13	0	1486.71	tr|D6RC13|D6RC13_HUMAN;sp|Q8N7B6-2|PACRL_HUMAN;tr|D6RC28|D6RC28_HUMAN;tr|D6R9N9|D6R9N9_HUMAN;sp|Q8N7B6|PACRL_HUMAN;tr|D6RC23|D6RC23_HUMAN;tr|D6RAM4|D6RAM4_HUMAN;tr|D6RGK2|D6RGK2_HUMAN;sp|Q8N7B6-4|PACRL_HUMAN	tr|D6RC13|D6RC13_HUMAN	yes	no	3	0.00033321	52.576	85723000
AALVLEDGSVLR	M	12	0	1241.7	sp|P27708|PYR1_HUMAN;NM_004341#(-s-:2_C4125949106984);NM_004341#(-t:2_C5043093094460);tr|F8VPD4|F8VPD4_HUMAN;NM_004341#(f-:2_C367188441482);NM_004341#(r:2_C5520111712499)	sp|P27708|PYR1_HUMAN	yes	no	2	2.8462e-10	142.08	1249400000
AALVMYWK	K	8	0	980.515	sp|O76024|WFS1_HUMAN;tr|H0Y9G5|H0Y9G5_HUMAN	sp|O76024|WFS1_HUMAN	yes	no	2	0.0044006	84.097	23594000
AALVVLENYYK	R	11	0	1281.7	sp|Q8TAA9-2|VANG1_HUMAN;sp|Q8TAA9|VANG1_HUMAN	sp|Q8TAA9-2|VANG1_HUMAN	yes	no	2	3.0365e-05	105.4	374570000
AALYILGDK	R	9	0	962.544	sp|O95248|MTMR5_HUMAN;sp|O95248-4|MTMR5_HUMAN;NM_002972#(r:22_S3520150773765);NM_002972#(-t:22_S4507188252494);NM_002972#(-t:22_S2178296417677);tr|G5E933|G5E933_HUMAN;NM_002972#(r:22_S296447738822);NM_002972#(f-:22_S7021266938379);NM_002972#(r:22_S4044155045837);NM_002972#(f-T:22_S2705056442658);NM_002972#(f-T:22_S3771922587362);NM_002972#(f-:22_S6845279518293);NM_002972#(r:22_S3853707863964);NM_…	sp|O95248|MTMR5_HUMAN	yes	no	2	0.035721	45.022	182410000
AALYLECSAK	R	10	0	1124.55	sp|Q9HBH0|RHOF_HUMAN	sp|Q9HBH0|RHOF_HUMAN	yes	yes	2	0.030867	40.714	23298000
AALYVHWPYCEK	R	12	0	1535.72	NM_018346#(-t:17_R5177277231404);NM_018346#(-s-:17_R4233389462688);NM_018346#(r:17_R8524398793083);sp|Q9HA92|RSAD1_HUMAN;NM_018346#(r:17_R7463098266445);NM_018346#(f-:17_R7252407226093);NM_018346#(-s-s-:17_R543638636724);NM_018346#(r:17_R1643589596650);tr|H0Y9X4|H0Y9X4_HUMAN	NM_018346#(-t:17_R5177277231404)	yes	no	3	0.0043316	37.613	166870
AAMAQVIGDR	R	10	0	1030.52	sp|Q02083-2|NAAA_HUMAN;NM_001042402#(-s-:4_N8130757126795);sp|Q02083|NAAA_HUMAN;NM_001042402#(-s-s-:4_N8223659469539);sp|Q02083-3|NAAA_HUMAN;tr|D6R9S9|D6R9S9_HUMAN;NM_014435#(-s-:4_N8124289935266)	sp|Q02083-2|NAAA_HUMAN	yes	no	2	0.00018138	100.88	229530000
AAMAVGGAGGSR	M	12	0	1003.49	sp|O14744|ANM5_HUMAN;NM_006109#(f-:14_P5155827925244);NM_006109#(-s-:14_P2439539107069);NM_006109#(-s-:14_P3066396482476);NM_006109#(f-:14_P7622347736965);NM_006109#(-t:14_P3055663574060);NM_006109#(-s-s-:14_P7019368214181);NM_006109#(r:14_P9044343086299);NM_001039619#(f-e-T:14_P517721244078);NM_006109#(r:14_P8298050910073);NM_006109#(f-:14_P9552346777508);tr|G3V5W5|G3V5W5_HUMAN;NM_006109#(-s-:14…	sp|O14744|ANM5_HUMAN	yes	no	2	3.6345e-05	93.839	255640000
AAMDNSEIAGEK	K	12	0	1234.55	tr|C9J406|C9J406_HUMAN	tr|C9J406|C9J406_HUMAN	no	no	2	5.8794e-10	130.1	330990000
AAMDNSEIAGEKK	K	13	1	1362.64	tr|C9J406|C9J406_HUMAN	tr|C9J406|C9J406_HUMAN	no	no	2,3	6.1314e-12	143.56	66144000
AAMEALVVEVTK	R	12	0	1259.68	sp|Q08211|DHX9_HUMAN;NM_001357#(-s-:1_D8664909047688);NM_001357#(-s-:1_D3394987094540);NM_001357#(f-T:1_D7035182508474);NM_001357#(-s-s-:1_D3710533341417);NM_001357#(r:1_D4868308529720);NM_001357#(-s-:1_D9398358861475);NM_001357#(-s-s-:1_D7669668670175);NM_001357#(-s-s-:1_D7470270530226);NM_001357#(-s-:1_D9579154987891);NM_001357#(-s-s-s-:1_D5255509926308);NM_001357#(-s-s-s-:1_D7157406681992);NM_…	sp|Q08211|DHX9_HUMAN	yes	no	2,3	2.4858e-06	105.65	1032400000
AAMEALVVEVTKQPAIISQLDPVNER	R	26	1	2820.51	sp|Q08211|DHX9_HUMAN;NM_001357#(-s-:1_D8664909047688);NM_001357#(-s-:1_D3394987094540);NM_001357#(f-T:1_D7035182508474);NM_001357#(-s-s-:1_D3710533341417);NM_001357#(r:1_D4868308529720);NM_001357#(-s-:1_D9398358861475);NM_001357#(-s-s-:1_D7669668670175);NM_001357#(-s-s-:1_D7470270530226);NM_001357#(-s-:1_D9579154987891);NM_001357#(-s-s-s-:1_D5255509926308);NM_001357#(-s-s-s-:1_D7157406681992);NM_…	sp|Q08211|DHX9_HUMAN	yes	no	3,4	1.6161e-102	200.13	16541000
AAMEPIVISAK	R	11	0	1128.62	NM_006289#(-s-s-:9_T5448982096712);NM_006289#(-s-s-s-:9_T6529221633583);NM_006289#(-s-s-s-s-s-s-:9_T9877463915433);NM_006289#(-s-s-s-s-s-:9_T6437789503476);NM_006289#(-s-s-s-s-s-:9_T8209657931625);NM_006289#(-s-s-s-s-s-:9_T8034355452369);NM_006289#(-s-s-s-s-:9_T3658876082806);NM_006289#(-s-s-s-s-s-s-s-s-s-:9_T936014498235);NM_006289#(-s-s-s-s-s-s-s-s-:9_T9102193833970);NM_006289#(-s-s-s-s-s-s-s-s…	NM_006289#(-s-s-s-:9_T1596020102767)	no	no	2	0.0029962	58.172	1703600000
AAMFPETLDEGMQIPSTQFDAAHPTNVQR	R	29	0	3201.49	sp|P35222|CTNB1_HUMAN;tr|B4DGU4|B4DGU4_HUMAN;NM_001098210#(-t:3_C9129490362789);NM_001098210#(-t:3_C2350901741797);NM_001098210#(f-T:3_C7564271859838);NM_001098210#(f-:3_C2437570538479);NM_001098210#(f-T:3_C7883709776443);tr|E7EMJ5|E7EMJ5_HUMAN	sp|P35222|CTNB1_HUMAN	yes	no	3,4	3.5247e-53	125.62	632840000
AAMFTAGSNFNHVVQNEK	K	18	0	1963.92	NM_012405#(-s-:1_I6948159225486);sp|O60725|ICMT_HUMAN	NM_012405#(-s-:1_I6948159225486)	yes	no	3	6.1957e-26	109.87	219650000
AAMGLGAR	K	8	0	745.39	sp|A1L0T0|ILVBL_HUMAN;tr|M0R026|M0R026_HUMAN;NM_006844#(-s-s-:19_I6261188282581);NM_006844#(-s-s-:19_I4750643286095);NM_006844#(-s-s-s-s-:19_I6638263504501);NM_006844#(r:19_I8018463981041);NM_006844#(r:19_I9887464395205);NM_006844#(-s-:19_I845322466525)	sp|A1L0T0|ILVBL_HUMAN	no	no	2	0.0072245	79.469	56522000
AAMGNFVDLCR	R	11	0	1252.57	NM_182984#(-s-:22_T3956386539471);NM_182984#(-s-:22_T4143633038909);NM_182984#(f-:22_T8168797661168);sp|Q8IZ69|TRM2A_HUMAN;tr|F2Z2W7|F2Z2W7_HUMAN;NM_182984#(-s-:22_T1340773340606);NM_182984#(-s-s-s-:22_T9359722018079);NM_182984#(-s-s-:22_T6875767335600);NM_182984#(-s-s-:22_T8313882592910);NM_182984#(-s-:22_T3409204217766);NM_182984#(r:22_T2117949804754)	NM_182984#(-s-:22_T3956386539471)	yes	no	2	0.00052436	68.107	92345000
AAMGPGISR	R	9	0	858.438	sp|Q96G03|PGM2_HUMAN;tr|E7ENQ8|E7ENQ8_HUMAN;tr|E9PD70|E9PD70_HUMAN	sp|Q96G03|PGM2_HUMAN	yes	no	2	0.0014643	89.08	73943000
AAMITHQR	K	8	0	926.476	sp|O14975|S27A2_HUMAN	sp|O14975|S27A2_HUMAN	yes	yes	3	0.0057746	58.426	26521000
AAMIWIVGEYAER	R	13	0	1507.75	sp|P63010|AP2B1_HUMAN;sp|P63010-2|AP2B1_HUMAN;NM_001282#(-t:17_A4938532452448);NM_001282#(f-:17_A6603848617321);NM_001030006#(-t:17_A4938532452448);NM_001030006#(f-:17_A6603848617321);NM_001282#(-t:17_A3337773315019);NM_001282#(-s-:17_A5495058865529);NM_001030006#(-t:17_A3337773315019);NM_001030006#(-s-:17_A5495058865529);tr|Q7Z451|Q7Z451_HUMAN;NM_001282#(-s-:17_A2584488564983);NM_001030006#(-s-:…	sp|P63010|AP2B1_HUMAN	no	no	2,3	2.6331e-11	123.95	170010000
AAMKPGWEDLVR	R	12	1	1371.7	sp|Q15596|NCOA2_HUMAN;tr|E7EWM1|E7EWM1_HUMAN	sp|Q15596|NCOA2_HUMAN	no	no	3	0.0018994	64.64	17185000
AAMLAPLLEVIK	K	12	0	1267.76	sp|Q14191|WRN_HUMAN;NM_000553#(-t:8_W5132561324444)	sp|Q14191|WRN_HUMAN	yes	no	2	0.0074346	46.88	16710000
AAMPPQIIQFPEDQK	K	15	0	1711.86	NM_053025#(-t:3_M7355809752952);sp|Q15746|MYLK_HUMAN;NM_053025#(f-t:3_M1422300647695);NM_053025#(-t:3_M2788002665269);sp|Q15746-5|MYLK_HUMAN;NM_053027#(-s-e-e-S-:3_M3621386565308);sp|Q15746-3|MYLK_HUMAN;NM_053025#(-s-:3_M9350386658146);NM_053025#(-s-:3_M9694755618102);NM_053025#(f-:3_M9544603574087);NM_053027#(f-t:3_M1422300647695);NM_053027#(-t:3_M2788002665269);NM_053027#(-s-:3_M9350386658146);…	NM_053025#(-t:3_M7355809752952)	no	no	2,3	3.8691e-12	104.55	53107000
AAMRETWLSENQR	K	13	1	1590.76	sp|Q01082|SPTB2_HUMAN;NM_003128#(f-:2_S9945403355743);NM_003128#(f-:2_S886050107133);NM_003128#(-s-:2_S7239118451463);NM_003128#(-s-:2_S285915103186);NM_003128#(f-t:2_S36809207774);NM_003128#(-t:2_S9364907984270);NM_003128#(f-:2_S3266705601618);NM_003128#(-s-:2_S4647947387841);NM_003128#(-s-s-:2_S2145980096779);NM_003128#(-s-:2_S7271124306907);NM_003128#(-s-s-:2_S6745116337822);NM_003128#(-s-:2_S…	sp|Q01082|SPTB2_HUMAN	no	no	3	0.014811	47.668	3327000
AAMTDAMVPR	K	10	0	1061.5	sp|Q9P0K7-3|RAI14_HUMAN;tr|E7EMX7|E7EMX7_HUMAN;sp|Q9P0K7|RAI14_HUMAN;sp|Q9P0K7-2|RAI14_HUMAN;sp|Q9P0K7-4|RAI14_HUMAN;NM_015577#(f-:5_R8509735638008)	sp|Q9P0K7-3|RAI14_HUMAN	yes	no	2	0.0011117	74.533	57827000
AAMTSLMDLTLLLAR	K	15	0	1618.88	NM_005993#(-s-s-s-s-s-s-s-s-s-s-s-:17_T7509445836169)	NM_005993#(-s-s-s-s-s-s-s-s-s-s-s-:17_T7509445836169)	no	no	3	0.00076198	40.983	906380
AAMYSVEITVEK	K	12	0	1339.67	sp|O75781|PALM_HUMAN	sp|O75781|PALM_HUMAN	yes	yes	3	0.020984	42.629	37829000
AANAAENDFSVSQAEMSSR	K	19	0	1983.86	NM_001090#(-s-e-e-S-:6_A9335846435135);sp|Q8NE71|ABCF1_HUMAN;NM_001025091#(r:6_A7342759000457);NM_001025091#(f-:6_A9993338664966);NM_001025091#(r:6_A2221518872741);sp|Q8NE71-2|ABCF1_HUMAN;NM_001090#(r:6_A7342759000457);NM_001025091#(-s-:6_A1603218869745);NM_001090#(f-:6_A9993338664966);NM_001090#(r:6_A2221518872741);NM_001090#(-s-:6_A1603218869745);NM_001090#(r:6_A9448520777249);tr|H0YGW7|H0YGW7_…	NM_001090#(-s-e-e-S-:6_A9335846435135)	yes	no	2,3	1.1962e-74	237.86	300050000
AANATTNPSQLLPLELVDK	M	19	0	1994.07	sp|Q9Y4Y9|LSM5_HUMAN;tr|B8ZZF8|B8ZZF8_HUMAN	sp|Q9Y4Y9|LSM5_HUMAN	yes	no	2,3	1.188e-19	115.57	2378700000
AANATTNPSQLLPLELVDKCIGSR	M	24	1	2567.34	sp|Q9Y4Y9|LSM5_HUMAN;tr|B8ZZF8|B8ZZF8_HUMAN	sp|Q9Y4Y9|LSM5_HUMAN	yes	no	3	0.080515	41.672	1840700
AANDAGYFNDEMAPIEVK	K	18	0	1953.88	sp|P42765|THIM_HUMAN;NM_006111#(-t:18_A1001262651561);tr|K7EME0|K7EME0_HUMAN;NM_006111#(f-T:18_A6763984976141)	sp|P42765|THIM_HUMAN	yes	no	2,3	1.7402e-35	142.88	780120000
AANFENHSGK	R	10	0	1073.49	NM_003373#(-s-:10_V7808343453743);NM_014000#(-s-:10_V7808343453743);NM_003373#(-s-s-:10_V4946397173805);NM_014000#(-s-s-:10_V4946397173805);NM_003373#(-s-s-s-:10_V7544549772803);NM_014000#(-s-s-s-:10_V7544549772803);NM_003373#(-s-s-s-s-:10_V9783051377797);NM_014000#(-s-s-s-s-:10_V9783051377797);NM_003373#(-s-s-s-s-s-:10_V2193193708518);NM_014000#(-s-s-s-s-s-:10_V2193193708518);tr|Q5JQ13|Q5JQ13_HU…	sp|P18206-2|VINC_HUMAN	no	no	2,3	0.00011008	110.53	136350000
AANFVHMDTAQK	K	12	0	1331.63	sp|Q16566|KCC4_HUMAN;NM_001744#(f-:5_C9649906511209)	sp|Q16566|KCC4_HUMAN	yes	no	3	0.028189	30.567	36118000
AANGVVLATEK	K	11	0	1071.59	sp|P25787|PSA2_HUMAN;NM_002787#(-s-:7_P4363191588511)	sp|P25787|PSA2_HUMAN	yes	no	2	5.1157e-05	105.03	1234100000
AANGVVLATEKK	K	12	1	1199.69	sp|P25787|PSA2_HUMAN;NM_002787#(-s-:7_P4363191588511)	sp|P25787|PSA2_HUMAN	yes	no	2,3	7.7478e-06	115.92	40867000
AANILVGENLVCK	R	13	0	1399.75	sp|P12931|SRC_HUMAN;sp|P12931-2|SRC_HUMAN;sp|P07947|YES_HUMAN;tr|J3QRU1|J3QRU1_HUMAN	sp|P12931|SRC_HUMAN	no	no	2	1.2557e-06	92.295	432650000
AANILVSDTLSCK	R	13	0	1390.71	sp|P06239|LCK_HUMAN;NM_005356#(f-:1_L3406717127486);sp|P06239-3|LCK_HUMAN;tr|Q573B4|Q573B4_HUMAN;NM_005356#(rr:1_L586569017773)	sp|P06239|LCK_HUMAN	yes	no	2	9.8282e-09	116.51	251690000
AANIPEHNTIGFMFACVGR	K	19	0	2104	sp|Q8NEZ5|FBX22_HUMAN;NM_147188#(-t:15_F8673747050006);tr|H3BTR7|H3BTR7_HUMAN;NM_147188#(f-:15_F3907092280600)	sp|Q8NEZ5|FBX22_HUMAN	no	no	3	1.9966e-53	166.6	13027000
AANIVIQTEPPVPVSINSNITR	R	22	0	2332.28	sp|Q9P2N5|RBM27_HUMAN	sp|Q9P2N5|RBM27_HUMAN	yes	yes	3	0.00027012	38.267	744900
AANKDQELIENESYR	R	15	1	1778.84	sp|Q9H7U1|CCSE2_HUMAN;NM_018999#(-s-:10_K5490116115774);sp|Q9H7U1-3|CCSE2_HUMAN;sp|Q9H7U1-2|CCSE2_HUMAN	sp|Q9H7U1|CCSE2_HUMAN	yes	no	3	1.7481e-11	110.55	4970800
AANLEMFK	K	8	0	922.458	NM_020699#(-t:1_G4141829851794);sp|Q8WXI9|P66B_HUMAN	NM_020699#(-t:1_G4141829851794)	yes	no	2	0.078109	55.37	13983000
AANLLLGYK	K	9	0	961.56	NM_001130481#(-t:2_V351902838707);sp|Q86Y07|VRK2_HUMAN;NM_001130481#(f-:2_V5142891028270);NM_001130482#(-t:2_V351902838707);sp|Q86Y07-3|VRK2_HUMAN;NM_001130483#(f-:2_V3439240224861);NM_001130483#(f-T:2_V517996412564);NM_001130483#(-t:2_V351902838707);NM_001130483#(f-:2_V5142891028270);sp|Q86Y07-5|VRK2_HUMAN;sp|Q86Y07-2|VRK2_HUMAN;NM_001130482#(f-:2_V5142891028270);sp|Q86Y07-4|VRK2_HUMAN;NM_001130…	NM_001130481#(-t:2_V351902838707)	yes	no	2	0.0013603	88.819	34003000
AANLSGDCSLVNEIFR	R	16	0	1764.85	sp|Q9Y6H3|ATP23_HUMAN	sp|Q9Y6H3|ATP23_HUMAN	yes	yes	2	6.455e-15	100.43	19319000
AANMHAQIK	R	9	0	982.502	sp|Q99988|GDF15_HUMAN	sp|Q99988|GDF15_HUMAN	yes	yes	2,3	0.0012749	90.135	44149000
AANMIPAHDSPLAALAFDASGTK	R	23	0	2268.12	NM_001033519#(-t:7_W3967949083651);NM_016003#(-t:7_W3967949083651);NM_001033519#(f-:7_W7484153545025);sp|Q9Y4P8-2|WIPI2_HUMAN;NM_001033519#(f-T:7_W2622386761542);NM_016003#(f-:7_W7484153545025);sp|Q9Y4P8-4|WIPI2_HUMAN;NM_016003#(f-T:7_W2622386761542);NM_001033518#(-t:7_W3967949083651);NM_015610#(-t:7_W3967949083651);NM_001033519#(-s-s-:7_W5778734766254);NM_016003#(-s-s-:7_W5778734766254);NM_00103…	NM_001033519#(-t:7_W3967949083651)	no	no	2,3	1.0091e-41	133.27	119900000
AANMLQQSGSK	K	11	0	1133.55	sp|P46063|RECQ1_HUMAN	sp|P46063|RECQ1_HUMAN	yes	yes	2	2.2494e-11	150.09	151820000
AANMPDSELFELISENR	K	17	0	1934.9	sp|Q07864|DPOE1_HUMAN;tr|E7ETS8|E7ETS8_HUMAN;tr|F5H1D6|F5H1D6_HUMAN;NM_006231#(r:12_P9383162409758);NM_006231#(r:12_P9661688689513);NM_006231#(r:12_P448646737883);tr|F5H7H6|F5H7H6_HUMAN	sp|Q07864|DPOE1_HUMAN	yes	no	2,3	9.1655e-09	78.078	14935000
AANNGALPPDLSYIVR	R	16	0	1669.88	sp|P08574|CY1_HUMAN;NM_001916#(-t:8_C5670906165082);NM_001916#(f-t:8_C1757997458189);NM_001916#(-t:8_C4868125314103);NM_001916#(f-T:8_C5376501118598);NM_001916#(f-:8_C1979487349628);NM_001916#(r:8_C8384283551421)	sp|P08574|CY1_HUMAN	yes	no	2,3	1.8316e-30	150.34	718930000
AANNGSAMVR	R	10	0	989.471	NM_014329#(f-t:16_E7887517660241);sp|Q6P2E9|EDC4_HUMAN;NM_014329#(r:16_E904006409367);NM_014329#(-s-:16_E2255814819030);NM_014329#(-s-:16_E6198207729904);NM_014329#(-s-s-s-:16_E5331300514786);NM_014329#(-s-:16_E7152495232127);NM_014329#(-s-:16_E4007469769952);NM_014329#(-s-s-s-:16_E2983626038445);NM_014329#(-s-s-:16_E5589279074751);NM_014329#(-s-s-s-s-:16_E1846836156468);NM_014329#(-s-s-s-s-s-:16…	NM_014329#(f-t:16_E7887517660241)	yes	no	2	0.00013033	105.98	8692200
AANNIASLLTK	R	11	0	1114.63	sp|Q9BV44|THUM3_HUMAN;tr|H7C0R6|H7C0R6_HUMAN	sp|Q9BV44|THUM3_HUMAN	yes	no	2	1.0362e-06	125.72	204160000
AANPEMPLSFTISR	K	14	0	1532.77	sp|Q7L5L3|GDPD3_HUMAN;NM_024307#(r:16_G7585335584858);sp|Q7L5L3-1|GDPD3_HUMAN	sp|Q7L5L3|GDPD3_HUMAN	yes	no	2	0.0057342	41.542	13539000
AANPFQQK	R	8	0	902.461	NM_025250#(f-:7_T5993126631851);NM_025250#(-s-:7_T7366969976279);sp|Q9C0H2-2|TTYH3_HUMAN;NM_025250#(-s-:7_T5518250518761);sp|Q9C0H2|TTYH3_HUMAN;sp|Q9C0H2-4|TTYH3_HUMAN;NM_025250#(-s-:7_T2027672411146);NM_025250#(-t:7_T7864020836498);NM_025250#(f-:7_T6775989749094);NM_025250#(-s-s-:7_T6975821190582);NM_025250#(-s-:7_T5963672343243);NM_025250#(-s-s-:7_T6030855570846);NM_025250#(-s-s-s-:7_T458062676…	NM_025250#(f-:7_T5993126631851)	yes	no	2	0.00098807	125.25	12521000
AANPGCSLEDFVR	K	13	0	1434.66	sp|Q15042|RB3GP_HUMAN;tr|C9J837|C9J837_HUMAN;tr|A6H8Z3|A6H8Z3_HUMAN;NM_012233#(-s-:2_R3923429178824)	sp|Q15042|RB3GP_HUMAN	yes	no	2	1.3474e-17	153.74	186140000
AANPVDFLSK	R	10	0	1060.56	NM_017647#(-s-:17_F8515563870212);sp|Q8IY81|SPB1_HUMAN;NM_017647#(-s-s-:17_F9744990598063);NM_017647#(r:17_F8681964923930);NM_017647#(-s-:17_F2610808925110);NM_017647#(-s-s-s-s-:17_F7253093778605);NM_017647#(r:17_F8130909252858);NM_017647#(r:17_F2286093514181);NM_017647#(r:17_F6192956337092);NM_017647#(-s-:17_F2309024964785)	NM_017647#(-s-:17_F8515563870212)	yes	no	2	0.00053372	82.417	1225000000
AANQVEETLHTHLPQTPETNFR	K	22	0	2532.24	sp|Q5VZL5-4|ZMYM4_HUMAN;sp|Q5VZL5|ZMYM4_HUMAN;sp|Q5VZL5-2|ZMYM4_HUMAN	sp|Q5VZL5-4|ZMYM4_HUMAN	yes	no	4	2.344e-67	153.19	8365100
AANSLEAFIFETQDK	K	15	0	1682.82	NM_001130991#(-t:11_H9370691807938);sp|Q9Y4L1|HYOU1_HUMAN;NM_001130991#(-s-:11_H2507974379065);NM_001130991#(r:11_H569148953171);tr|E9PL22|E9PL22_HUMAN;NM_001130991#(-t:11_H9700707985140);NM_001130991#(-t:11_H7124740232747);NM_001130991#(-s-s-:11_H4374346581406);NM_001130991#(-s-T:11_H4103726842918);NM_001130991#(-s-:11_H4436687704905);NM_001130991#(-s-s-s-:11_H5441129194164);NM_001130991#(-s-s-s…	NM_001130991#(-t:11_H9370691807938)	yes	no	2,3	1.8768e-32	174.68	1254800000
AANVCYQEFDVPAVFPIELK	R	20	0	2309.14	sp|Q8NE22-2|SETD9_HUMAN;sp|Q8NE22|SETD9_HUMAN;NM_153706#(-s-S-:5_C5029973478080);NM_153706#(-t:5_C2473351798643);NM_153706#(-s-:5_C7240628240873)	sp|Q8NE22-2|SETD9_HUMAN	yes	no	3	8.8441e-05	42.348	6874400
AANVFPFR	M	8	0	920.487	sp|Q9H9F9|ARP5_HUMAN	sp|Q9H9F9|ARP5_HUMAN	yes	yes	2	0.0030434	89.142	96263000
AANVGSMFQYWK	M	12	0	1400.65	sp|Q13948|CASP_HUMAN;sp|Q13948-10|CASP_HUMAN;sp|Q13948-2|CASP_HUMAN;sp|Q13948-9|CASP_HUMAN;sp|P39880-9|CUX1_HUMAN;sp|P39880-3|CUX1_HUMAN	sp|P39880-3|CUX1_HUMAN	no	no	2	7.7844e-05	80.69	16293000
AANVLLSEHGEVK	K	13	0	1365.73	tr|B4DR80|B4DR80_HUMAN;sp|Q9Y6E0-2|STK24_HUMAN;sp|Q9Y6E0|STK24_HUMAN;NM_001032296#(-s-:13_S5888216251507);tr|H0Y630|H0Y630_HUMAN	tr|B4DR80|B4DR80_HUMAN	yes	no	3	4.6928e-07	91.62	107220000
AANVLLSEQGDVK	K	13	0	1342.71	tr|Q8NBY1|Q8NBY1_HUMAN;sp|Q9P289|MST4_HUMAN;tr|B4E0Y9|B4E0Y9_HUMAN;sp|Q9P289-3|MST4_HUMAN;NM_001042453#(-t:X_M2494628601443);sp|Q9P289-2|MST4_HUMAN;NM_001042452#(-t:X_M2494628601443);NM_006374#(-s-:2_S6020602886112);sp|O00506|STK25_HUMAN;NM_006374#(-t:2_S2807108407899);NM_006374#(-s-:2_S5759800730317);NM_006374#(-s-s-:2_S6487713580699);tr|B7Z9K1|B7Z9K1_HUMAN;NM_006374#(-t:2_S7068178342438);tr|A8K…	tr|Q8NBY1|Q8NBY1_HUMAN	no	no	2	2.6662e-11	125.03	249950000
AANVTLLTSLVEGEAVHLAR	K	20	0	2063.14	sp|P05549|AP2A_HUMAN;tr|Q96SH1|Q96SH1_HUMAN;sp|P05549-5|AP2A_HUMAN;tr|Q5TAV5|Q5TAV5_HUMAN;sp|Q6VUC0|AP2E_HUMAN;sp|Q92481|AP2B_HUMAN;sp|Q92481-2|AP2B_HUMAN;NM_003221#(-s-:6_T4772293880847)	sp|P05549|AP2A_HUMAN	yes	no	3	1.9069e-50	153.36	71303000
AANVVASTK	R	9	0	859.476	sp|O75146|HIP1R_HUMAN;NM_003959#(-t:12_H4255661972101);NM_003959#(-s-s-:12_H4175031113852);NM_003959#(-s-:12_H7543198810768);NM_003959#(-s-:12_H5428879273238);NM_003959#(-s-:12_H5339262199116);NM_003959#(-s-:12_H8555782506195);NM_003959#(-s-:12_H8389733664418);NM_003959#(-s-s-:12_H7122565716199);NM_003959#(-s-:12_H8762162734777);NM_003959#(-s-:12_H7166909301831);NM_003959#(-s-s-:12_H7041314009712…	sp|O75146|HIP1R_HUMAN	no	no	2	0.0030405	77.662	45467000
AANWYER	K	7	0	908.414	sp|O75489|NDUS3_HUMAN;NM_004551#(f-t:11_N695648987514);NM_004551#(-s-:11_N3776807085179);NM_004551#(r:11_N9664985084021)	sp|O75489|NDUS3_HUMAN	yes	no	2	0.0066084	128.57	359620000
AANYDFYQLLEEK	K	13	0	1602.76	sp|Q8ND04|SMG8_HUMAN;sp|Q8ND04-2|SMG8_HUMAN;tr|J3KTD7|J3KTD7_HUMAN	sp|Q8ND04|SMG8_HUMAN	yes	no	2,3	1.7293e-06	84.297	37486000
AANYSSTSTRR	M	11	1	1212.58	sp|Q9BTV4|TMM43_HUMAN;NM_024334#(-s-:3_T8824404552543)	sp|Q9BTV4|TMM43_HUMAN	yes	no	2	3.6861e-05	100.82	4113800
AAPAAPPAAR	K	10	0	891.493	sp|P17676|CEBPB_HUMAN	sp|P17676|CEBPB_HUMAN	yes	yes	2	0.039266	36.424	2878000
AAPAGGFQNIACLR	R	14	0	1444.72	sp|Q9UBP6|TRMB_HUMAN;NM_023033#(-s-S-:12_M1358231693175);NM_005371#(-s-:12_M6800912475922);tr|H0YIH0|H0YIH0_HUMAN	sp|Q9UBP6|TRMB_HUMAN	yes	no	2	2.4182e-08	98.407	271920000
AAPAPTASSTININTSTSK	K	19	0	1830.93	NM_153810#(f-:10_C1914102494192);sp|Q86Y37|CACL1_HUMAN;sp|Q86Y37-2|CACL1_HUMAN;NM_153810#(f-:10_C5832765573330);NM_153810#(-s-:10_C1603159313025)	NM_153810#(f-:10_C1914102494192)	yes	no	3	3.5625e-06	61.757	1128200
AAPAQQTTQPGGGK	M	14	0	1310.66	sp|Q9NXG2|THUM1_HUMAN;tr|J3KQB0|J3KQB0_HUMAN;tr|H3BNW0|H3BNW0_HUMAN	sp|Q9NXG2|THUM1_HUMAN	yes	no	2	1.6823e-10	135.81	49897000
AAPAQQTTQPGGGKR	M	15	1	1466.76	sp|Q9NXG2|THUM1_HUMAN;tr|J3KQB0|J3KQB0_HUMAN;tr|H3BNW0|H3BNW0_HUMAN	sp|Q9NXG2|THUM1_HUMAN	yes	no	2	2.3511e-26	174.39	17805000
AAPASSAGASDAR	R	13	0	1130.53	sp|Q8NF37|PCAT1_HUMAN	sp|Q8NF37|PCAT1_HUMAN	yes	yes	2	3.3571e-08	115.57	15477000
AAPAVQTK	R	8	0	784.444	sp|P55084|ECHB_HUMAN;tr|F5GZQ3|F5GZQ3_HUMAN;NM_000183#(f-:2_H3656594664319);NM_000183#(-s-:2_H5333252230574);tr|B5MD38|B5MD38_HUMAN;tr|C9JEY0|C9JEY0_HUMAN;tr|C9JE81|C9JE81_HUMAN;tr|C9K0M0|C9K0M0_HUMAN	sp|P55084|ECHB_HUMAN	yes	no	2	0.0038823	110.31	306950000
AAPCEGQAFAVGVEK	M	15	0	1532.73	tr|C9J0I9|C9J0I9_HUMAN;sp|Q86WB0|NIPA_HUMAN;NM_016478#(f-T:7_Z1463386694563);sp|Q86WB0-3|NIPA_HUMAN;NM_016478#(-s-:7_Z3609685306039);tr|C9J672|C9J672_HUMAN;tr|F8WAU5|F8WAU5_HUMAN;tr|F8WBD7|F8WBD7_HUMAN;tr|F8WDK5|F8WDK5_HUMAN;tr|F8WF13|F8WF13_HUMAN	tr|C9J0I9|C9J0I9_HUMAN	yes	no	2	1.8065e-06	86.548	11522000
AAPCIYWLPLTDSQIVQK	K	18	0	2102.09	tr|E7EQT4|E7EQT4_HUMAN;sp|Q9UKV3|ACINU_HUMAN;NM_014977#(-s-:14_A3604459593553);NM_014977#(-s-:14_A7490241721447);NM_014977#(-s-:14_A4794745176323);NM_014977#(-s-s-:14_A1718609671231);NM_014977#(-s-s-:14_A5184409401757);NM_014977#(-s-s-s-:14_A1324406473336);NM_014977#(-s-s-s-:14_A6624113588972);NM_014977#(-s-s-s-s-:14_A6536816286798);NM_014977#(-s-s-s-:14_A1231643634971);NM_014977#(-s-s-s-s-:14_A6…	tr|E7EQT4|E7EQT4_HUMAN	no	no	2,3,4	6.1699e-26	106.6	1062500000
AAPDAQVPPEYVWAPAKPPEETSDHADL	K	28	1	3000.41	sp|Q8WWX9|SELM_HUMAN;NM_080430#(-s-:22_S2496275958277)	sp|Q8WWX9|SELM_HUMAN	yes	no	3	0.082329	26.13	7970000
AAPDDPSGFAVLASCAR	R	17	0	1703.79	sp|Q9UHJ6|SHPK_HUMAN	sp|Q9UHJ6|SHPK_HUMAN	yes	yes	2,3	1.7932e-09	88.319	119180000
AAPDILIATPGR	R	12	0	1193.68	NM_017895#(-s-s-:20_D5126977116436);sp|Q96GQ7|DDX27_HUMAN;NM_017895#(-s-s-s-:20_D3355061181339);NM_017895#(-s-:20_D7993699142072);NM_017895#(-s-:20_D6694971069538);NM_017895#(-s-:20_D6798222861405);NM_017895#(-s-:20_D847693378368);NM_017895#(-s-s-s-:20_D3131847366121);NM_017895#(-s-s-:20_D7603115929221);NM_017895#(r:20_D5358547248846);NM_017895#(-s-:20_D3584011942122);NM_017895#(-s-s-s-s-:20_D225…	NM_017895#(-s-s-:20_D5126977116436)	yes	no	2	0.00012368	74.698	751220000
AAPDITGHK	K	9	0	908.472	NM_017455#(f-:15_N388133696960);sp|Q9Y639-1|NPTN_HUMAN;NM_012428#(f-:15_N5869307578467);NM_012428#(f-:15_N388133696960);sp|Q9Y639|NPTN_HUMAN;NM_012428#(f-S-T:15_N6316696022144);NM_012428#(-s-:15_N4718100955582);sp|Q9Y639-3|NPTN_HUMAN;tr|Q9UFM8|Q9UFM8_HUMAN;sp|Q9Y639-4|NPTN_HUMAN;tr|H7BXJ1|H7BXJ1_HUMAN;tr|F5GZD0|F5GZD0_HUMAN;sp|Q9Y639-5|NPTN_HUMAN;NM_017455#(-s-:15_N6217027050776);tr|H3BU51|H3BU51…	NM_017455#(f-:15_N388133696960)	yes	no	2,3	0.00097976	81.972	134920000
AAPDITGHKR	K	10	1	1064.57	NM_017455#(f-:15_N388133696960);sp|Q9Y639-1|NPTN_HUMAN;NM_012428#(f-:15_N5869307578467);NM_012428#(f-:15_N388133696960);sp|Q9Y639|NPTN_HUMAN;NM_012428#(f-S-T:15_N6316696022144);NM_012428#(-s-:15_N4718100955582);sp|Q9Y639-3|NPTN_HUMAN;tr|Q9UFM8|Q9UFM8_HUMAN;sp|Q9Y639-4|NPTN_HUMAN;tr|H7BXJ1|H7BXJ1_HUMAN;tr|F5GZD0|F5GZD0_HUMAN;sp|Q9Y639-5|NPTN_HUMAN;NM_017455#(-s-:15_N6217027050776);tr|H3BU51|H3BU51…	NM_017455#(f-:15_N388133696960)	yes	no	3	0.00019623	86.898	20425000
AAPDPVLEAGPVAHGPLPVPLVLDNGSFQVR	R	31	0	3131.68	sp|Q9H9F9|ARP5_HUMAN	sp|Q9H9F9|ARP5_HUMAN	yes	yes	3,4	9.8707e-62	134.91	131420000
AAPEASGTPSSDAVSR	R	16	0	1501.7	NM_007074#(-s-:16_C3194609702871);sp|P31146|COR1A_HUMAN;NM_007074#(r:16_C3739053349869);NM_007074#(-t:16_C1947838477552);NM_007074#(-t:16_C7330844818677);NM_007074#(-s-s-s-:16_C9591257454734);NM_007074#(-s-s-:16_C7451904721332);NM_007074#(f-:16_C9970459107217);NM_007074#(-s-s-:16_C9140080054932);NM_007074#(-s-:16_C7992875447337);NM_007074#(-s-s-s-s-:16_C4205321310283);NM_007074#(-s-s-s-:16_C85164…	NM_007074#(-s-:16_C3194609702871)	yes	no	2	3.8622e-37	159.34	1177000000
AAPEASGTPSSDAVSRLEEEMR	R	22	1	2289.05	NM_007074#(-s-:16_C3194609702871);sp|P31146|COR1A_HUMAN;NM_007074#(r:16_C3739053349869);NM_007074#(-t:16_C1947838477552);NM_007074#(-t:16_C7330844818677);NM_007074#(-s-s-s-:16_C9591257454734);NM_007074#(-s-s-:16_C7451904721332);NM_007074#(f-:16_C9970459107217);NM_007074#(-s-s-:16_C9140080054932);NM_007074#(-s-:16_C7992875447337);NM_007074#(-s-s-s-s-:16_C4205321310283);NM_007074#(-s-s-s-:16_C85164…	NM_007074#(-s-:16_C3194609702871)	yes	no	3	2.2681e-07	89.831	37537000
AAPEASSPPASPLQHLLPGK	K	20	0	1967.05	NM_022833#(-s-:9_F8683753176316);NM_022833#(f-:9_F2684459366460);sp|Q96TA1-2|NIBL1_HUMAN;sp|Q96TA1|NIBL1_HUMAN;NM_001035534#(-s-:9_F8683753176316);NM_001035534#(-s-:9_F9186340450511);NM_001035534#(-t:9_F3986725680776);NM_022833#(-s-:9_F9186340450511);NM_022833#(-t:9_F3986725680776);NM_001035534#(-s-:9_F9754978859604);NM_022833#(-s-:9_F9754978859604);NM_001035534#(-s-:9_F4561681880747);NM_022833#(…	NM_022833#(-s-:9_F8683753176316)	no	no	2,3	1.1803e-11	84.249	736620000
AAPEEHDSPTEASQPIVEEEETK	M	23	0	2522.13	sp|Q9H0S4|DDX47_HUMAN;tr|F5H1N9|F5H1N9_HUMAN	sp|Q9H0S4|DDX47_HUMAN	yes	no	2,3	1.3957e-77	173.81	141040000
AAPEEPQQRPPEAVAAAPAGTTSSR	K	25	1	2488.23	sp|Q96JP5-2|ZFP91_HUMAN;sp|Q96JP5|ZFP91_HUMAN	sp|Q96JP5-2|ZFP91_HUMAN	yes	no	3	4.0393e-31	139.47	4423100
AAPEERDLTQEQTEK	M	15	1	1743.83	sp|Q96CS3|FAF2_HUMAN	sp|Q96CS3|FAF2_HUMAN	yes	yes	2	2.0393e-21	173.51	4470200
AAPEGSGLGEDAR	M	13	0	1228.57	sp|Q96G03|PGM2_HUMAN;tr|E7ENQ8|E7ENQ8_HUMAN;tr|E9PD70|E9PD70_HUMAN	sp|Q96G03|PGM2_HUMAN	yes	no	2	0.0010581	64.104	11344000
AAPEINNLIEEATEFIK	K	17	0	1900.98	sp|Q8IVP5|FUND1_HUMAN	sp|Q8IVP5|FUND1_HUMAN	yes	yes	2,3	3.1319e-14	95.692	25877000
AAPEMVSLLK	K	10	0	1057.58	sp|Q92947|GCDH_HUMAN;tr|B4DK85|B4DK85_HUMAN;sp|Q92947-2|GCDH_HUMAN;tr|K7ESA6|K7ESA6_HUMAN;tr|K7EQ99|K7EQ99_HUMAN	sp|Q92947|GCDH_HUMAN	yes	no	2	0.0023105	66.056	819100000
AAPENPGGVLSVELPGLLAQLAR	R	23	0	2271.26	tr|H7BXI1|H7BXI1_HUMAN;NM_020728#(f-T:7_F8563985310606);sp|A0FGR8-2|ESYT2_HUMAN;NM_020728#(f-T:7_F9923960184907);NM_020728#(-s-:7_F7295625317734);NM_020728#(-s-:7_F7696976854783);NM_020728#(-s-s-:7_F4142992696396);NM_020728#(-s-:7_F254853328034);NM_020728#(-s-:7_F4032984822866);NM_020728#(-s-:7_F9310069632393);NM_020728#(-s-s-s-:7_F2401308127514);NM_020728#(-s-s-:7_F6721488527610);NM_020728#(-s-s…	tr|H7BXI1|H7BXI1_HUMAN	yes	no	2,3,4	6.142e-05	53.998	70435000
AAPEPLRPR	M	9	1	1005.57	sp|Q15599|NHRF2_HUMAN;tr|D3DU85|D3DU85_HUMAN;sp|Q15599-2|NHRF2_HUMAN;NM_004785#(-s-:16_S4622142932235)	sp|Q15599|NHRF2_HUMAN	yes	no	2	0.0029748	88.267	346970000
AAPEPQQPMELYQPSAESLR	K	20	0	2241.07	sp|Q96BH1|RNF25_HUMAN;NM_022453#(-s-:2_R2501851234707)	sp|Q96BH1|RNF25_HUMAN	yes	no	3	2.7169e-12	86.539	5889600
AAPFSLEYR	R	9	0	1052.53	sp|Q15181|IPYR_HUMAN;NM_021129#(f-T:10_P1070172294020);NM_021129#(-s-:10_P8142001344601);NM_021129#(-s-:10_P6204726946943);NM_021129#(-s-:10_P7845260418572);NM_021129#(f-:10_P2433058777383);NM_021129#(f-:10_P6150285681832);NM_021129#(-t:10_P8784495156447);tr|Q5SQT6|Q5SQT6_HUMAN;NM_021129#(-s-s-:10_P6959491627097)	sp|Q15181|IPYR_HUMAN	no	no	2	6.4587e-06	141.48	3919300000
AAPGAAGSR	K	9	0	756.388	sp|Q92522|H1X_HUMAN	sp|Q92522|H1X_HUMAN	yes	yes	2	0.0011776	97.635	19041000
AAPGAEFAPNK	R	11	0	1071.53	NM_007363#(f-:X_N9450563463443);NM_007363#(-t:X_N8492080783096);NM_007363#(f-:X_N3137943208978);sp|Q15233|NONO_HUMAN;NM_007363#(f-:X_N1387069055847);NM_007363#(f-:X_N1926318001037);NM_007363#(f-:X_N2197015475729);sp|Q15233-2|NONO_HUMAN;NM_007363#(f-:X_N9759917473099);NM_007363#(-s-:X_N3279528605865);NM_007363#(-t:X_N8650059699758);NM_007363#(-t:X_N1086427785758);NM_007363#(f-:X_N7761823973487);NM…	NM_007363#(f-:X_N9450563463443)	no	no	2	0.0001164	89.171	1641500000
AAPGAEFAPNKR	R	12	1	1227.64	NM_007363#(f-:X_N9450563463443);NM_007363#(-t:X_N8492080783096);NM_007363#(f-:X_N3137943208978);sp|Q15233|NONO_HUMAN;NM_007363#(f-:X_N1387069055847);NM_007363#(f-:X_N1926318001037);NM_007363#(f-:X_N2197015475729);sp|Q15233-2|NONO_HUMAN;NM_007363#(f-:X_N9759917473099);NM_007363#(-s-:X_N3279528605865);NM_007363#(-t:X_N8650059699758);NM_007363#(-t:X_N1086427785758);NM_007363#(f-:X_N7761823973487);NM…	NM_007363#(f-:X_N9450563463443)	no	no	2,3	2.789e-11	149.33	2143800000
AAPGAGDAAAGSGAEFAGGDGAAR	R	24	0	1973.88	sp|Q5K4L6|S27A3_HUMAN;sp|Q5K4L6-2|S27A3_HUMAN;sp|Q5K4L6-3|S27A3_HUMAN	sp|Q5K4L6|S27A3_HUMAN	yes	no	2	0.000695	56.131	5940000
AAPGALLVMGVSGSGK	M	16	0	1413.77	tr|Q5T6J8|Q5T6J8_HUMAN;sp|Q5T6J7|GNTK_HUMAN	tr|Q5T6J8|Q5T6J8_HUMAN	yes	no	2	1.7094e-06	91.657	3232100
AAPGDPQDELLPLAGPGSQWLR	M	22	0	2287.16	NM_021136#(f-T:14_R7709311746650);NM_021136#(-t:14_R4080845425149);sp|Q16799|RTN1_HUMAN;NM_021136#(f-T:14_R8001101142989);NM_021136#(f-:14_R3009876457162);NM_021136#(-t:14_R2703033447140);NM_021136#(-t:14_R8224293090765);NM_021136#(f-:14_R8598589952065);NM_021136#(f-t:14_R6155403207092)	NM_021136#(f-T:14_R7709311746650)	yes	no	3	0.0044514	45.363	5373900
AAPGEFR	R	7	0	746.371	sp|P55265-2|DSRAD_HUMAN;sp|P55265-3|DSRAD_HUMAN;tr|H0YCK3|H0YCK3_HUMAN;NM_015840#(-s-:1_A8302946893558);NM_015841#(-s-:1_A8302946893558);NM_015840#(r:1_A9514435630981);NM_015841#(r:1_A9514435630981);NM_015841#(-s-s-:1_A4686328212493);NM_015840#(-s-s-:1_A4686328212493);NM_015841#(-s-s-:1_A1631120794197);NM_015841#(-s-s-:1_A1182692127235);NM_015840#(r:1_A9676804557152);NM_015840#(-s-s-:1_A682193572…	sp|P55265-2|DSRAD_HUMAN	no	no	2	0.022238	81.613	20768000
AAPGPALCLFDVDGTLTAPR	M	20	0	2041.03	sp|O15305|PMM2_HUMAN;NM_000303#(f-T:16_P3385933075096);NM_000303#(f-T:16_P7941886539405);NM_000303#(f-:16_P4748229938880);NM_000303#(-t:16_P6569312801727);NM_000303#(-s-s-:16_P8620470204746);NM_000303#(-t:16_P6280354214379);tr|H3BRM0|H3BRM0_HUMAN;NM_000303#(f-:16_P4697429789954);tr|B7Z6R0|B7Z6R0_HUMAN;tr|H3BR08|H3BR08_HUMAN;tr|H3BM92|H3BM92_HUMAN;tr|H3BV34|H3BV34_HUMAN;tr|H3BT06|H3BT06_HUMAN;tr|H…	sp|O15305|PMM2_HUMAN	yes	no	2,3	2.9607e-50	166.52	735380000
AAPGPAYEEEGTPLR	R	15	0	1556.75	sp|Q3KP66-3|CA106_HUMAN;NM_018265#(-s-:1_C1533337159253);NM_018265#(-s-:1_C8060559189459);sp|Q3KP66|CA106_HUMAN;NM_018265#(-t:1_C2392804309816)	sp|Q3KP66-3|CA106_HUMAN	yes	no	2	0.0013329	53.168	1183400
AAPGPGPSTFSFVPPSK	K	17	0	1642.84	sp|P35658-2|NU214_HUMAN;sp|P35658-4|NU214_HUMAN;sp|P35658|NU214_HUMAN;sp|P35658-3|NU214_HUMAN;sp|P35658-5|NU214_HUMAN;NM_005085#(-t:9_N3014304407895);NM_005085#(-s-s-:9_N9257601338418);NM_005085#(-s-:9_N6955004479384);NM_005085#(-s-:9_N1878201017575);NM_005085#(-s-s-s-:9_N4172882942762);NM_005085#(-s-s-:9_N7244891573150);NM_005085#(-s-:9_N3086199358444);NM_005085#(f-:9_N7325913664200)	sp|P35658-2|NU214_HUMAN	yes	no	2	1.792e-08	79.514	188880000
AAPLAAPPPAPAAPPAVAPPAGPR	R	24	0	2124.18	sp|Q6SPF0|SAMD1_HUMAN	sp|Q6SPF0|SAMD1_HUMAN	yes	yes	2,3	9.1343e-10	81.016	84739000
AAPLAGFGYGLPISR	R	15	0	1488.81	sp|Q15120|PDK3_HUMAN;sp|Q15120-2|PDK3_HUMAN	sp|Q15120|PDK3_HUMAN	yes	no	2	2.9288e-09	93.243	149640000
AAPLDSIHSLAAYYIDCIR	R	19	0	2148.07	sp|P49327|FAS_HUMAN;NM_004104#(f-:17_F1077701467315);NM_004104#(-s-:17_F2914674533955);NM_004104#(-s-:17_F2955763659391);NM_004104#(-t:17_F8810097319914);NM_004104#(-s-s-:17_F3338822613971);NM_004104#(f-:17_F8465271853650);NM_004104#(-s-:17_F3214771148080);NM_004104#(r:17_F8997999164453);NM_004104#(f-t:17_F5488199791338);NM_004104#(-t:17_F2952608284637);NM_004104#(-s-:17_F8878905945369);NM_004104…	sp|P49327|FAS_HUMAN	no	no	2,3,4	9.5122e-36	136.49	1312500000
AAPLGGMFSGQPPGPPQAPPGLPGQASLLQAAPGAPR	M	37	0	3457.79	sp|Q9H204|MED28_HUMAN	sp|Q9H204|MED28_HUMAN	yes	yes	3,4	6.4645e-15	88.241	16017000
AAPLIPLSQQIPTGNSLYESYYK	M	23	0	2552.32	sp|Q9UBC2-2|EP15R_HUMAN;sp|Q9UBC2|EP15R_HUMAN;NM_021235#(f-:19_E9585562645990);sp|Q9UBC2-3|EP15R_HUMAN;NM_021235#(-s-:19_E4880432570863);NM_021235#(-s-:19_E685042373805);tr|M0R165|M0R165_HUMAN;tr|A5PL29|A5PL29_HUMAN;tr|M0R1V5|M0R1V5_HUMAN;tr|K7EJR2|K7EJR2_HUMAN;tr|M0R330|M0R330_HUMAN;tr|M0QX30|M0QX30_HUMAN	sp|Q9UBC2-2|EP15R_HUMAN	yes	no	2,3	6.1631e-11	92.792	85554000
AAPLLLAR	R	8	0	823.528	sp|P15309|PPAP_HUMAN;NM_001099#(r:3_A5214133573825);sp|P15309-2|PPAP_HUMAN;NM_001099#(f-:3_A4932696397156);NM_001099#(f-t:3_A1845391378642);NM_001099#(-t:3_A7996001568668);NM_001134194#(-s-:3_A9378961953537);tr|Q5FBY0|Q5FBY0_HUMAN;tr|E9PFE6|E9PFE6_HUMAN;NM_001099#(f-:3_A4396275293367);NM_001099#(f-T:3_A529667505502);NM_001099#(-t:3_A1653587007631);NM_001099#(-t:3_A4152588879430)	sp|P15309|PPAP_HUMAN	yes	no	2	0.01681	62.717	26193000
AAPLQGMLPGLLAPLR	R	16	0	1616.94	sp|P12111|CO6A3_HUMAN;sp|P12111-2|CO6A3_HUMAN;tr|E7ENL6|E7ENL6_HUMAN;tr|E9PCV6|E9PCV6_HUMAN;sp|P12111-4|CO6A3_HUMAN;NM_004369#(-s-s-s-:2_C7728943515591);NM_004369#(-s-s-:2_C7186644083091);NM_004369#(-s-s-:2_C6424286407226);NM_004369#(-s-:2_C2747375423134);NM_004369#(-s-:2_C1952148283268);NM_004369#(-s-:2_C3108348211039);NM_057167#(-s-s-s-:2_C7728943515591);NM_057167#(-s-s-:2_C7186644083091);NM_05…	sp|P12111|CO6A3_HUMAN	yes	no	2,3	2.919e-13	95.264	239960000
AAPPEPGEPEERK	M	13	1	1405.68	sp|Q5RI15|COX20_HUMAN;sp|Q5RI15-2|COX20_HUMAN;NM_198076#(-s-:1_F9487120327091)	sp|Q5RI15|COX20_HUMAN	yes	no	2	6.1776e-05	84.365	4689800
AAPPGEYFSVGSQVSCR	M	17	0	1810.83	tr|K7ELG9|K7ELG9_HUMAN;sp|Q3MHD2|LSM12_HUMAN;sp|Q3MHD2-2|LSM12_HUMAN	tr|K7ELG9|K7ELG9_HUMAN	yes	no	2,3	1.3929e-24	146.2	115610000
AAPPQIPDTR	K	10	0	1064.56	NM_022756#(f-S-T:1_C1734635523488);NM_022756#(-s-t:1_C7586592524722);NM_022756#(f-S-:1_C5136635035654);sp|Q9HAF1-2|EAF6_HUMAN;sp|Q9HAF1|EAF6_HUMAN;NM_022756#(-s-s-:1_C4316397416949);tr|B1AK64|B1AK64_HUMAN;NM_022756#(-t:1_C9652828046467);NM_022756#(f-:1_C8668630562768);sp|Q9HAF1-3|EAF6_HUMAN;NM_022756#(-s-:1_C8210579604266);NM_022756#(-t:1_C9012772527301);NM_022756#(f-t:1_C1268067543134);NM_022756…	NM_022756#(f-S-T:1_C1734635523488)	yes	no	2	0.00218	66.19	131310000
AAPPQPVTHLIFDMDGLLLDTER	M	23	0	2548.3	tr|E7EVH9|E7EVH9_HUMAN;sp|Q08623-3|HDHD1_HUMAN;sp|Q08623|HDHD1_HUMAN;sp|Q08623-2|HDHD1_HUMAN	tr|E7EVH9|E7EVH9_HUMAN	yes	no	3	2.8153e-07	78.976	8873000
AAPPTAGSMAIEK	K	13	0	1242.63	NM_014503#(-s-:12_U4916159715712);NM_014503#(-s-:12_U5824205269865);NM_014503#(-s-:12_U1873139581272);sp|O75691|UTP20_HUMAN;NM_014503#(-s-:12_U4710649009358);NM_014503#(-s-s-s-:12_U7633150193859);NM_014503#(-s-s-:12_U3714829603709);NM_014503#(-s-:12_U2545290252226);NM_014503#(-s-s-:12_U2492624747842);NM_014503#(-s-:12_U4099816756873);NM_014503#(-s-s-s-:12_U6579686780518);NM_014503#(-s-s-:12_U2707…	NM_014503#(-s-:12_U4916159715712)	no	no	2	0.00090884	59.248	92592000
AAPQDVHVR	M	9	0	991.52	sp|Q12981|SEC20_HUMAN;sp|Q12981-1|SEC20_HUMAN;sp|Q12981-2|SEC20_HUMAN;sp|Q12981-3|SEC20_HUMAN	sp|Q12981|SEC20_HUMAN	yes	no	2	0.010829	68.456	53012000
AAPQPLNLVSSVTLSK	K	16	0	1623.92	sp|Q9H334-2|FOXP1_HUMAN;tr|G5E965|G5E965_HUMAN;tr|H0Y882|H0Y882_HUMAN;sp|Q9H334-3|FOXP1_HUMAN;sp|Q9H334-6|FOXP1_HUMAN;sp|Q9H334-4|FOXP1_HUMAN;sp|Q9H334|FOXP1_HUMAN;tr|E9PFD3|E9PFD3_HUMAN;tr|C9J0F0|C9J0F0_HUMAN	sp|Q9H334-2|FOXP1_HUMAN	no	no	2,3	0.0016011	40.014	1252500
AAPQPSVSCVYK	K	12	0	1305.64	sp|P38435-2|VKGC_HUMAN;sp|P38435|VKGC_HUMAN;NM_000821#(-s-:2_G9152629909561);NM_000821#(-s-:2_G2806009486473);NM_000821#(-s-s-:2_G9780183822190);NM_000821#(-s-s-s-s-:2_G1999528193218);NM_000821#(-s-s-:2_G9954459173978);NM_000821#(-s-:2_G7666887009980);NM_000821#(-s-s-:2_G9956006247575);NM_000821#(-s-s-s-:2_G4035222312104);NM_000821#(-s-s-s-:2_G3444752503422);NM_000821#(-s-:2_G1613702897916);NM_00…	sp|P38435-2|VKGC_HUMAN	yes	no	2	2.8439e-05	88.338	83683000
AAPQSPSVPK	K	10	0	980.529	sp|O75694|NU155_HUMAN;sp|O75694-2|NU155_HUMAN;tr|E9PF10|E9PF10_HUMAN	sp|O75694|NU155_HUMAN	yes	no	2	0.0010653	76.943	42803000
AAPRPAPVAQPPAAAPPSAVGSSAAAPR	R	28	1	2532.36	NM_016139#(-t:7_C5989479017685);sp|Q9Y6H1|CHCH2_HUMAN;NM_016139#(f-:7_C3870645996151);sp|Q5T1J5|CHCH9_HUMAN;NM_016139#(-s-:7_C5750238801455)	NM_016139#(-t:7_C5989479017685)	yes	no	3,4	5.0691e-11	99.836	19150000
AAPRPPPAR	M	9	1	931.535	NM_013236#(-t:22_A6404705652352);sp|Q9UBB4|ATX10_HUMAN;NM_013236#(f-:22_A2487608684849);NM_013236#(f-T:22_A7506551479171);sp|Q9UBB4-2|ATX10_HUMAN;NM_013236#(f-:22_A7214221508125)	NM_013236#(-t:22_A6404705652352)	yes	no	2	0.0050522	84.743	81922000
AAPSAGSWSTFQHK	M	14	0	1473.7	sp|P42575|CASP2_HUMAN;tr|C9JRR9|C9JRR9_HUMAN	sp|P42575|CASP2_HUMAN	yes	no	2	1.8855e-06	90.884	18542000
AAPSDGFKPR	M	10	1	1044.54	sp|Q92979|NEP1_HUMAN	sp|Q92979|NEP1_HUMAN	yes	yes	2	3.8594e-07	163.16	771270000
AAPSEVAAIAPGEGDGGGGGFGSWLDGR	M	28	0	2557.18	sp|Q96MW1|CCD43_HUMAN;NM_144609#(f-T:17_C3829597527509);tr|Q86WV7|Q86WV7_HUMAN;NM_144609#(f-:17_C8584679326781);sp|Q96MW1-2|CCD43_HUMAN;NM_144609#(-t:17_C984898535417);NM_144609#(-s-s-:17_C2930263026254);NM_144609#(-s-:17_C3358035687538)	sp|Q96MW1|CCD43_HUMAN	yes	no	3	6.0377e-07	70.145	23487000
AAPSPSGGGGSGGGSGSGTPGPVGSPAPGHPAVSSMQGKR	M	40	1	3398.6	NM_003010#(f-:17_M3638752706954);NM_003010#(-s-:17_M1469985837601);sp|P45985|MP2K4_HUMAN;NM_003010#(f-:17_M3579192603790);NM_003010#(-t:17_M9929997982869);NM_003010#(f-T:17_M9049477849188);NM_003010#(-s-:17_M8768473617148);NM_003010#(f-t:17_M7255196245984);NM_003010#(-t:17_M587071633387);NM_003010#(f-:17_M5019596114246)	NM_003010#(f-:17_M3638752706954)	yes	no	3	0.078267	0.54825	33539000
AAPSTAPAEATPPKPGEAEAPPK	R	23	1	2184.11	sp|O95817|BAG3_HUMAN	sp|O95817|BAG3_HUMAN	yes	yes	3	3.0929e-07	95.996	60358000
AAPSYEDFVAALTVK	R	15	0	1580.81	sp|Q96JA3|PKHA8_HUMAN;tr|J3KQS5|J3KQS5_HUMAN	sp|Q96JA3|PKHA8_HUMAN	yes	no	2	0.00011572	61.265	3119300
AAPTAASDQPDSAATTEK	R	18	0	1730.8	sp|Q9BRP8-2|WIBG_HUMAN;sp|Q9BRP8|WIBG_HUMAN	sp|Q9BRP8-2|WIBG_HUMAN	yes	no	2	8.5524e-52	168.64	13123000
AAPTPTPAPVPVPVPLPAPAPAPHGEAR	K	28	0	2674.46	sp|Q96T58|MINT_HUMAN	sp|Q96T58|MINT_HUMAN	yes	yes	3,4	3.8082e-11	76.899	170000000
AAPTSAPPSK	R	10	0	925.487	sp|Q13123|RED_HUMAN;NM_006083#(-s-s-:5_I714820623550);NM_006083#(-s-:5_I8561329640872);NM_006083#(f-:5_I7608854014451);NM_006083#(f-:5_I8423156701158);NM_006083#(r:5_I6482657895874);NM_006083#(-s-:5_I3295628969079);NM_006083#(-t:5_I5070935095993);NM_006083#(-s-:5_I2291565706883);NM_006083#(-s-s-:5_I9690317327998);NM_006083#(f-:5_I3789569108403);NM_006083#(-s-:5_I5133864400530);NM_006083#(f-:5_I75…	sp|Q13123|RED_HUMAN	yes	no	2	0.055267	47.302	277770
AAPVDLELK	M	9	0	954.539	tr|E5RGS4|E5RGS4_HUMAN;sp|O60925|PFD1_HUMAN;tr|D6RGG5|D6RGG5_HUMAN	tr|E5RGS4|E5RGS4_HUMAN	yes	no	2	0.02779	54.539	191900000
AAPVDLELKK	M	10	1	1082.63	tr|E5RGS4|E5RGS4_HUMAN;sp|O60925|PFD1_HUMAN;tr|D6RGG5|D6RGG5_HUMAN	tr|E5RGS4|E5RGS4_HUMAN	yes	no	2	0.00025156	98.04	477810000
AAPVLLR	M	7	0	738.475	sp|Q8N0U8|VKORL_HUMAN;tr|E7ETM5|E7ETM5_HUMAN	sp|Q8N0U8|VKORL_HUMAN	yes	no	2	0.01823	87.582	128900000
AAPVTGGMGAVLMR	R	14	0	1329.69	sp|P18583-5|SON_HUMAN;sp|P18583-7|SON_HUMAN;sp|P18583|SON_HUMAN;sp|P18583-9|SON_HUMAN;sp|P18583-2|SON_HUMAN;NM_138927#(r:21_S484681810531);NM_138927#(f-:21_S5770854054387);NM_138927#(r:21_S3547466338860);tr|H7C1M2|H7C1M2_HUMAN;tr|J3QSZ5|J3QSZ5_HUMAN	sp|P18583-5|SON_HUMAN	yes	no	2	1.3276e-06	84.892	83723000
AAPVVAPPGVVVSR	M	14	0	1317.78	sp|Q13144|EI2BE_HUMAN;tr|E9PC74|E9PC74_HUMAN;NM_003907#(r:3_E2385515095549);NM_003907#(-s-:3_E298125222585);NM_003907#(-s-:3_E9576806455809);NM_003907#(r:3_E5325147857059);NM_003907#(r:3_E3401884097172);NM_003907#(r:3_E4926711732584);NM_003907#(f-:3_E8204338442637);NM_003907#(-s-:3_E4622385706217);NM_003907#(-s-s-:3_E1796672995468);tr|C9JRD9|C9JRD9_HUMAN	sp|Q13144|EI2BE_HUMAN	yes	no	2	0.00094942	63.185	150480000
AAPYWITAPQNLVLSPGEDGTLICR	K	25	0	2741.38	tr|C9JYY6|C9JYY6_HUMAN;sp|Q92823-3|NRCAM_HUMAN;sp|Q92823-4|NRCAM_HUMAN;sp|Q92823-6|NRCAM_HUMAN;tr|F8W775|F8W775_HUMAN;sp|Q92823-2|NRCAM_HUMAN;sp|Q92823|NRCAM_HUMAN;sp|Q92823-5|NRCAM_HUMAN;tr|C9JH43|C9JH43_HUMAN	tr|C9JYY6|C9JYY6_HUMAN	yes	no	3	4.4777e-15	80.412	14527000
AAQAGVAVGDWVLSIDGENAGSLTHIEAQNK	K	31	0	3120.55	sp|Q9NR12|PDLI7_HUMAN;NM_005451#(f-:5_P6972449558584);NM_005451#(-t:5_P9975138875035);sp|Q9NR12-2|PDLI7_HUMAN;NM_005451#(-s-:5_P7920919316000);NM_203352#(-s-:5_P7920919316000);NM_005451#(-s-s-:5_P8604931427401);NM_005451#(-t:5_P8601958321870);NM_203352#(-t:5_P8601958321870);NM_005451#(-s-s-:5_P9404094833654);NM_005451#(-s-s-:5_P7767131293758);NM_203352#(-s-s-:5_P9404094833654);NM_005451#(-s-s-:5_…	sp|Q9NR12|PDLI7_HUMAN	yes	no	3,4	6.0781e-153	215.81	121310000
AAQALALLR	M	9	0	925.571	sp|Q16401-2|PSMD5_HUMAN;sp|Q16401|PSMD5_HUMAN;tr|F2Z3J2|F2Z3J2_HUMAN	sp|Q16401-2|PSMD5_HUMAN	yes	no	2	1.2321e-05	149.65	300150000
AAQAPSSFQLLYDLK	R	15	0	1650.86	tr|G3V2B8|G3V2B8_HUMAN;NM_005956#(-t:14_M5703796308105);NM_005956#(-t:14_M1015812245655);NM_005956#(-s-:14_M6479404898840);tr|F5H2F4|F5H2F4_HUMAN;NM_005956#(-s-:14_M6704739722235);NM_005956#(-s-:14_M8586771262486);NM_005956#(-s-:14_M842434965313);sp|P11586|C1TC_HUMAN	sp|P11586|C1TC_HUMAN	no	no	2,3	1.632e-32	183.41	4204800000
AAQAPTPGLLQSPR	R	14	0	1405.77	sp|Q9H0X9-2|OSBL5_HUMAN;sp|Q9H0X9|OSBL5_HUMAN;tr|B4DVB0|B4DVB0_HUMAN;tr|F5GZ42|F5GZ42_HUMAN;tr|H0YCD7|H0YCD7_HUMAN;tr|E9PNH0|E9PNH0_HUMAN	sp|Q9H0X9-2|OSBL5_HUMAN	yes	no	2	0.016244	39.629	12036000
AAQASDLEK	K	9	0	931.461	sp|P37837|TALDO_HUMAN;NM_006755#(f-:11_T2794141612217);NM_006755#(f-T:11_T9822560958215);NM_006755#(-s-:11_T2464670497638);NM_006755#(-t:11_T4271837330204);NM_006755#(-s-:11_T7441792173066);NM_006755#(f-:11_T1379398766492)	sp|P37837|TALDO_HUMAN	yes	no	2	0.001033	99.815	28832000
AAQASDLEKIHLDEK	K	15	1	1666.85	sp|P37837|TALDO_HUMAN;NM_006755#(f-:11_T2794141612217);NM_006755#(f-T:11_T9822560958215);NM_006755#(-s-:11_T2464670497638);NM_006755#(-t:11_T4271837330204);NM_006755#(-s-:11_T7441792173066);NM_006755#(f-:11_T1379398766492)	sp|P37837|TALDO_HUMAN	yes	no	3,4	4.0756e-13	132.08	49349000
AAQCGHPVLCVQPHHIGVAVK	K	21	0	2277.16	NM_005597#(-t:19_N5612182401845);sp|P08651-5|NFIC_HUMAN;tr|K7EMU1|K7EMU1_HUMAN;sp|P08651|NFIC_HUMAN;NM_005597#(f-T:19_N6664832634141);NM_005597#(f-:19_N1224835954181)	NM_005597#(-t:19_N5612182401845)	no	no	5	0.004891	32.797	264910
AAQDFFSTCR	R	10	0	1201.52	NM_000374#(f-:1_U1458673046577);NM_000374#(-t:1_U8175648673315);sp|P06132|DCUP_HUMAN;NM_000374#(-s-:1_U2779518880286);NM_000374#(f-:1_U8436642268547);NM_000374#(-s-s-:1_U8133360263937);NM_000374#(-s-:1_U3443693310024);NM_000374#(-t:1_U4881820301152);NM_000374#(-s-s-s-:1_U6351107914350);NM_000374#(-s-s-:1_U7542117655584);NM_000374#(rr:1_U4919925228799);NM_000374#(-s-:1_U6183574357455);NM_000374#(r…	NM_000374#(f-:1_U1458673046577)	yes	no	2	4.8702e-08	164.97	826750000
AAQDIKDEEPGDLGR	K	15	1	1612.77	sp|Q9BTC0|DIDO1_HUMAN;NM_033081#(-s-:20_D8940583824041);NM_033081#(-s-:20_D1339412485969);NM_033081#(-s-s-s-:20_D7802326726468);NM_033081#(-s-s-s-s-:20_D595265038471);NM_033081#(-s-s-s-s-:20_D219539027602);sp|Q9BTC0-1|DIDO1_HUMAN;NM_080797#(r:20_D6894134252109);NM_080797#(-s-:20_D8940583824041);NM_033081#(-s-:20_D7225770041532);NM_080797#(-s-:20_D1339412485969);NM_033081#(-s-s-:20_D1278792520942)…	sp|Q9BTC0|DIDO1_HUMAN	yes	no	3	7.1759e-13	128.64	59692000
AAQDLCEEALR	R	11	0	1274.59	NM_012469#(f-:20_P376393255676);sp|O94906|PRP6_HUMAN;sp|O94906-2|PRP6_HUMAN;NM_012469#(f-T:20_P332983751777);NM_012469#(-s-:20_P6072137748889);NM_012469#(-s-s-:20_P6876286865040);NM_012469#(-s-s-:20_P4354998175358);NM_012469#(-s-:20_P7609726871486);NM_012469#(-s-s-s-:20_P8844451882944);NM_012469#(-s-:20_P6201763996652);NM_012469#(-s-s-:20_P370132188127);NM_012469#(-s-:20_P4217872750449);NM_012469…	NM_012469#(f-:20_P376393255676)	yes	no	2	1.4907e-11	184.24	513610000
AAQDRDQIYR	R	10	1	1234.61	sp|P62995|TRA2B_HUMAN;NM_004593#(f-T:3_S444767650720);NM_004593#(-t:3_S1341597075389);sp|P62995-3|TRA2B_HUMAN;NM_004593#(f-:3_S825401909689);tr|H7C2L4|H7C2L4_HUMAN	sp|P62995|TRA2B_HUMAN	yes	no	2,3	9.1303e-07	211.64	114100000
AAQEEYVK	K	8	0	936.455	NM_000034#(-s-:16_A1237256709659);NM_184043#(f-:16_A9680935946002);NM_184043#(-s-:16_A4381978875601);NM_184043#(-t:16_A6931267526672);NM_184043#(f-:16_A5792193055679);NM_184043#(f-:16_A9367431045794);NM_184043#(f-:16_A4715196801107);NM_184043#(f-T:16_A929472833840);NM_184043#(-s-s-:16_A2260447598393);tr|H3BR68|H3BR68_HUMAN;NM_184043#(-t:16_A3929206818357);NM_184043#(f-T:16_A5813388251553);tr|J3KP…	NM_184043#(-t:16_A3929206818357)	no	no	2	0.0029779	111.95	2912100000
AAQEEYVKR	K	9	1	1092.56	NM_000034#(-s-:16_A1237256709659);NM_184043#(f-:16_A9680935946002);NM_184043#(-s-:16_A4381978875601);NM_184043#(-t:16_A6931267526672);NM_184043#(f-:16_A5792193055679);NM_184043#(f-:16_A9367431045794);NM_184043#(f-:16_A4715196801107);NM_184043#(f-T:16_A929472833840);NM_184043#(-s-s-:16_A2260447598393);tr|H3BR68|H3BR68_HUMAN;NM_184043#(-t:16_A3929206818357);NM_184043#(f-T:16_A5813388251553);tr|J3KP…	NM_184043#(-t:16_A3929206818357)	no	no	2,3	0.00028476	95.502	8476200
AAQEEYVKRALANSLACQGK	K	20	2	2206.12	NM_000034#(-s-:16_A1237256709659);NM_184043#(f-:16_A9680935946002);NM_184043#(-s-:16_A4381978875601);NM_184043#(-t:16_A6931267526672);NM_184043#(f-:16_A5792193055679);NM_184043#(f-:16_A9367431045794);NM_184043#(f-:16_A4715196801107);NM_184043#(f-T:16_A929472833840);NM_184043#(-s-s-:16_A2260447598393);tr|H3BR68|H3BR68_HUMAN;NM_184043#(-t:16_A3929206818357);NM_184043#(f-T:16_A5813388251553);tr|J3KP…	NM_184043#(-t:16_A3929206818357)	no	no	4	0.075874	39.905	272930
AAQELQEGQR	K	10	0	1128.55	sp|P35520-2|CBS_HUMAN;NM_000071#(-s-:21_C2402187073712);sp|P35520|CBS_HUMAN;NM_000071#(-s-:21_C4386745428675);NM_000071#(-s-:21_C5763467328243);NM_000071#(-s-:21_C3809736927472);NM_000071#(-s-:21_C7786651353232);NM_000071#(-s-s-:21_C2630841109481);NM_000071#(-s-:21_C419960034321);NM_000071#(-s-s-s-:21_C5210927881195);NM_000071#(-s-s-s-:21_C2247447906267);NM_000071#(-s-s-s-s-:21_C6480290783278);NM…	sp|P35520-2|CBS_HUMAN	yes	no	2	2.8285e-08	140.49	21390000
AAQEQVLNASR	K	11	0	1185.61	sp|Q99543|DNJC2_HUMAN;sp|Q99543-2|DNJC2_HUMAN	sp|Q99543|DNJC2_HUMAN	yes	no	2	8.9036e-12	142.19	283580000
AAQFVDLLGYFSLK	K	14	0	1570.84	sp|Q5T4S7-3|UBR4_HUMAN;NM_020765#(f-:1_U8505762085531);sp|Q5T4S7|UBR4_HUMAN;NM_020765#(f-T:1_U7529296726766);sp|Q5T4S7-2|UBR4_HUMAN;sp|Q5T4S7-4|UBR4_HUMAN;NM_020765#(-t:1_U7631085373844)	sp|Q5T4S7-3|UBR4_HUMAN	yes	no	3	3.2734e-06	68.283	5426400
AAQGEPQVQFK	M	11	0	1201.61	sp|P62826|RAN_HUMAN;tr|B5MDF5|B5MDF5_HUMAN;NM_006325#(r:12_R3748126936229);NM_006325#(r:12_R4832117313030);NM_006325#(r:12_R1821243412226);NM_006325#(-s-:12_R9242732563367);NM_006325#(f-:12_R116667396605);NM_006325#(-s-:12_R7653669623112)	sp|P62826|RAN_HUMAN	yes	no	2	7.485e-06	123.79	5673600000
AAQGPPAPAVPPNTDVMACTQTALLQK	K	27	0	2746.38	tr|H0YEB6|H0YEB6_HUMAN;NM_006396#(-t:11_S9245844307839);sp|O60232|SSA27_HUMAN;tr|G3V1B8|G3V1B8_HUMAN;NM_006396#(r:11_S2030108519106)	tr|H0YEB6|H0YEB6_HUMAN	yes	no	2,3	0.00031208	45.639	48229000
AAQGVGPGPGSAAPPGLEAAR	M	21	0	1829.94	tr|B8ZZ87|B8ZZ87_HUMAN;NM_025029#(-s-:2_F7801009752189);sp|Q6NZ67|MZT2B_HUMAN;NM_001085365#(-s-:2_F2274062579003);sp|Q6P582|MZT2A_HUMAN;NM_025029#(-s-:2_F5819809835518);NM_001085365#(-s-:2_F3145826058887)	tr|B8ZZ87|B8ZZ87_HUMAN	yes	no	2	0.00069127	59.163	6466100
AAQHDLPASEGEVWSMPVPVER	K	22	0	2404.15	sp|O75449|KTNA1_HUMAN;NM_007044#(f-T:6_K8464896962549);NM_007044#(-s-:6_K2223519332007);tr|B7ZBC8|B7ZBC8_HUMAN;sp|O75449-2|KTNA1_HUMAN;tr|B7ZBC9|B7ZBC9_HUMAN	sp|O75449|KTNA1_HUMAN	yes	no	3	8.3857e-11	79.589	149900000
AAQHGVCSVLK	K	11	0	1168.6	NM_015179#(-s-s-s-s-s-s-s-s-:10_R5454604056481);NM_015179#(-s-s-s-s-s-s-s-s-s-:10_R352640296724)	NM_015179#(-s-s-s-s-s-s-s-s-s-:10_R352640296724)	no	no	2,3	4.9592e-06	113.95	931410000
AAQIFITELTLR	K	12	0	1374.79	sp|Q13952-5|NFYC_HUMAN;sp|Q13952|NFYC_HUMAN;tr|Q5T6K7|Q5T6K7_HUMAN;tr|E9PI99|E9PI99_HUMAN;NM_014223#(f-T:1_N6444735650337);sp|Q13952-6|NFYC_HUMAN;tr|Q5T6K5|Q5T6K5_HUMAN;NM_014223#(-t:1_N6994869259099);NM_014223#(-t:1_N6173298360738);tr|F8VWM3|F8VWM3_HUMAN;sp|Q13952-2|NFYC_HUMAN;sp|Q13952-3|NFYC_HUMAN;tr|E9PIG7|E9PIG7_HUMAN;tr|E9PL11|E9PL11_HUMAN	sp|Q13952-5|NFYC_HUMAN	yes	no	2,3	1.4614e-05	80.69	105980000
AAQIGAHTLSGACLDPGAFK	K	20	0	1983.98	sp|Q16134|ETFD_HUMAN;NM_004453#(f-:4_E269275575769);tr|J3KND9|J3KND9_HUMAN;NM_004453#(-s-:4_E9394602434142)	sp|Q16134|ETFD_HUMAN	yes	no	3	3.4223e-68	175.85	59237000
AAQIPESDQIK	M	11	0	1198.62	sp|Q9Y5J7|TIM9_HUMAN;tr|G3V502|G3V502_HUMAN;tr|G3V2F3|G3V2F3_HUMAN;tr|G3V306|G3V306_HUMAN	sp|Q9Y5J7|TIM9_HUMAN	yes	no	2	0.0014471	68.536	64093000
AAQIPIVATTSTPGIVR	M	17	0	1693.97	sp|Q6PI98|IN80C_HUMAN;sp|Q6PI98-4|IN80C_HUMAN;NM_001098817#(-s-s-s-:18_I3228931028643);NM_001098817#(-s-s-:18_I7332965048329);NM_001098817#(-s-:18_I4852587041520);NM_194281#(-s-s-:18_I3650452786586);NM_194281#(-t:18_I8224224595465);NM_194281#(f-:18_I4017472807915);NM_001098817#(-s-s-:18_I3650452786586);NM_194281#(f-T:18_I6236796108280);sp|Q6PI98-3|IN80C_HUMAN;NM_001098817#(-t:18_I8224224595465);N…	sp|Q6PI98|IN80C_HUMAN	no	no	2	0.012487	47.916	2506500
AAQLAIR	R	7	0	741.45	tr|D3YTB1|D3YTB1_HUMAN;sp|P62910|RL32_HUMAN;tr|F8W727|F8W727_HUMAN;NM_001007073#(f-:3_R6821710086029)	tr|D3YTB1|D3YTB1_HUMAN	yes	no	2	0.0057954	144.29	5455000000
AAQLATEIADIK	K	12	0	1242.68	sp|Q15075|EEA1_HUMAN	sp|Q15075|EEA1_HUMAN	yes	yes	2	5.222e-05	78.964	558750000
AAQLCGAGMAAVVDK	R	15	0	1460.71	NM_000188#(-s-:10_H3220845649930);sp|P19367|HXK1_HUMAN;NM_000188#(-s-s-:10_H4706402415966);NM_033497#(-s-:10_H3220845649930);NM_000188#(-s-:10_H705582791);sp|P19367-3|HXK1_HUMAN;tr|E7ENR4|E7ENR4_HUMAN;NM_033497#(-s-s-:10_H4706402415966);NM_033497#(-s-:10_H705582791);NM_000188#(-s-s-s-s-:10_H7729525105115);NM_000188#(-s-:10_H7125006740115);NM_033497#(-s-s-s-s-:10_H7729525105115);NM_033497#(-s-:10_…	NM_033496#(-s-:10_H3220845649930)	no	no	2	2.0146e-05	69.331	509810000
AAQLCGAGMAAVVDKIR	R	17	1	1729.9	NM_000188#(-s-:10_H3220845649930);sp|P19367|HXK1_HUMAN;NM_000188#(-s-s-:10_H4706402415966);NM_033497#(-s-:10_H3220845649930);NM_000188#(-s-:10_H705582791);sp|P19367-3|HXK1_HUMAN;tr|E7ENR4|E7ENR4_HUMAN;NM_033497#(-s-s-:10_H4706402415966);NM_033497#(-s-:10_H705582791);NM_000188#(-s-s-s-s-:10_H7729525105115);NM_000188#(-s-:10_H7125006740115);NM_033497#(-s-s-s-s-:10_H7729525105115);NM_033497#(-s-:10_…	NM_033496#(-s-:10_H3220845649930)	no	no	3	0.00041959	64.454	1338700
AAQLCGAGMAAVVDR	R	15	0	1488.72	NM_000189#(-s-:2_H2056306429640);sp|P52789|HXK2_HUMAN;NM_000189#(-s-s-:2_H1494371039055);NM_000189#(-s-:2_H6042381285200);tr|E9PB90|E9PB90_HUMAN;NM_000189#(-s-s-s-s-:2_H8174905553632);NM_000189#(-s-:2_H7949889587647);NM_000189#(-s-:2_H6141736040228);NM_000189#(-s-s-:2_H7620218466510);NM_000189#(-s-:2_H9270994362918);NM_000189#(-s-s-s-s-:2_H5179782576927);NM_000189#(-s-s-s-s-s-s-s-s-:2_H3238381225…	NM_000189#(-s-:2_H2056306429640)	no	no	2	0.00018481	59.728	39082000
AAQLEPITYMQGLSACEQIR	R	20	0	2278.11	sp|Q9HBH0|RHOF_HUMAN	sp|Q9HBH0|RHOF_HUMAN	yes	yes	2,3	3.1834e-33	118.37	54623000
AAQLGFGGVYIQTDVGGSGLSR	K	22	0	2152.09	sp|Q9UKU7|ACAD8_HUMAN;NM_014384#(-t:11_A9225084193321);tr|B7Z5W4|B7Z5W4_HUMAN	sp|Q9UKU7|ACAD8_HUMAN	yes	no	3	0.0055675	36.663	533290
AAQLGFK	K	7	0	733.412	NM_000108#(-s-:7_D6024410908836);sp|P09622|DLDH_HUMAN;tr|E9PEX6|E9PEX6_HUMAN;NM_000108#(f-t:7_D4954471032484);tr|B4DT69|B4DT69_HUMAN;NM_000108#(-s-:7_D248556200200);NM_000108#(f-:7_D784340235954);NM_000108#(-t:7_D3823615351820);tr|F8WDM5|F8WDM5_HUMAN;tr|F2Z2E3|F2Z2E3_HUMAN	NM_000108#(-s-:7_D6024410908836)	yes	no	2	0.010409	99.919	933300000
AAQLIGTCSQNVAAIQEQVLGLGALR	R	26	0	2680.43	NM_001130106#(r:19_H2708080510134);NM_001130106#(r:19_H4390688646569);sp|Q9NZL4|HPBP1_HUMAN;NM_001130106#(-s-:19_H6324170670374);NM_001130106#(f-:19_H5457801636985);NM_001130106#(-s-:19_H8203738360814);tr|C9JNI7|C9JNI7_HUMAN;sp|Q9NZL4-2|HPBP1_HUMAN;tr|K7EN20|K7EN20_HUMAN;tr|K7EL16|K7EL16_HUMAN;NM_001130106#(f-:19_H4637042606900)	NM_001130106#(r:19_H2708080510134)	yes	no	2,3,4	3.0256e-82	164.05	323750000
AAQLPNDVVLQIMELCGATR	R	20	0	2198.12	sp|Q96D71-3|REPS1_HUMAN;sp|Q96D71|REPS1_HUMAN;NM_031922#(-s-:6_R1815557568716);NM_031922#(-s-:6_R7966617572807);NM_001128617#(-s-:6_R3213241723413);tr|F2Z3L2|F2Z3L2_HUMAN;sp|Q96D71-2|REPS1_HUMAN;tr|J3KP76|J3KP76_HUMAN;tr|E9PMG1|E9PMG1_HUMAN;NM_001128617#(-s-:6_R1815557568716);tr|H0YDT0|H0YDT0_HUMAN;NM_001128617#(-s-:6_R7966617572807)	sp|Q96D71-2|REPS1_HUMAN	no	no	2,3	4.0221e-68	166.47	95300000
AAQLRPISLPGVSSTEDLQDLFR	K	23	1	2512.33	NM_014774#(f-t:1_K8573468807828);NM_014774#(-s-:1_K979368521309);sp|O75071|EFC14_HUMAN;NM_014774#(-t:1_K5667835704009)	NM_014774#(f-t:1_K8573468807828)	yes	no	3	0.00077209	53.998	7914900
AAQLVDKDSTFLSTLEHHLSR	R	21	1	2367.22	sp|Q969V3-2|NCLN_HUMAN;sp|Q969V3|NCLN_HUMAN;NM_020170#(r:19_N646464691795);tr|K7EMW4|K7EMW4_HUMAN;NM_020170#(-s-:19_N880721064103);NM_020170#(-s-s-:19_N3935566676384);NM_020170#(-s-:19_N3729677443741);tr|K7ELZ9|K7ELZ9_HUMAN	sp|Q969V3-2|NCLN_HUMAN	yes	no	3,4,5	4.9463e-69	197.68	389210000
AAQLVQLQGPDAHGVFLVR	K	19	0	2018.11	sp|Q9UQQ2|SH2B3_HUMAN;tr|F5GYM4|F5GYM4_HUMAN;tr|F8VZW1|F8VZW1_HUMAN	sp|Q9UQQ2|SH2B3_HUMAN	yes	no	3	2.6626e-05	54.253	1121800
AAQMHSGYQR	R	10	0	1147.52	sp|Q96PK6|RBM14_HUMAN;NM_006328#(r:11_R8737586258822);NM_006328#(f-:11_R1042488097534)	sp|Q96PK6|RBM14_HUMAN	yes	no	2,3	1.7549e-07	134.57	210580000
AAQMLQSNK	R	9	0	989.496	sp|Q68CQ4|DIEXF_HUMAN;NM_014388#(f-:1_C2824646220576)	sp|Q68CQ4|DIEXF_HUMAN	yes	no	2	0.0010138	100.02	38379000
AAQNEIWQTFFR	K	12	0	1509.74	NM_006019#(-s-s-s-s-:11_T8246554951808);NM_006019#(-s-s-s-:11_T525169613949);NM_006019#(-s-s-:11_T5801475570849);NM_006019#(-s-s-:11_T2091335898593);NM_006019#(-s-s-:11_T1681175055861);NM_006019#(-s-:11_T4029410365644);NM_006019#(-s-:11_T1909390039868);sp|Q13488|VPP3_HUMAN;NM_006019#(-s-s-:11_T5488496415117);NM_006019#(-s-s-:11_T4132957537508);NM_006019#(r:11_T685035026313);NM_006019#(-s-:11_T629…	NM_006019#(-s-s-s-s-:11_T8246554951808)	yes	no	2,3	7.2282e-21	208.74	66999000
AAQNISK	R	7	0	730.397	sp|Q99623|PHB2_HUMAN;tr|J3KPX7|J3KPX7_HUMAN;NM_007273#(-t:12_P2092477123384);NM_007273#(f-:12_P5827044590713);tr|F5GY37|F5GY37_HUMAN;NM_007273#(-s-:12_P6616085365265);sp|Q99623-2|PHB2_HUMAN;NM_007273#(f-:12_P6526074697918);NM_007273#(f-t:12_P7498573951167);NM_007273#(-s-s-:12_P1524956884040);NM_007273#(-s-s-:12_P423502191667);NM_007273#(-s-:12_P6421227425211)	sp|Q99623|PHB2_HUMAN	yes	no	2	0.012148	101.28	98759000
AAQNSGEAEYIEK	K	13	0	1408.65	NM_002291#(r:7_L1939419800563);sp|P07942|LAMB1_HUMAN;tr|G3XAI2|G3XAI2_HUMAN	NM_002291#(r:7_L1939419800563)	yes	no	2,3	1.6297e-11	127.71	248830000
AAQPPAQPCQLCGR	R	14	0	1552.72	sp|Q96B54|ZN428_HUMAN;tr|M0QXZ5|M0QXZ5_HUMAN;NM_182498#(-s-:19_Z3597659063411);NM_182498#(r:19_Z5998358575602)	sp|Q96B54|ZN428_HUMAN	yes	no	2	6.0331e-10	116.24	534830000
AAQQAASSSGQGQQAQTPTGK	K	21	0	2000.95	sp|P48729|KC1A_HUMAN;NM_001025105#(-s-t:5_C3397433054487);NM_001025105#(-t:5_C8343487636395);NM_001892#(-s-:5_C8299146950351);sp|P48729-2|KC1A_HUMAN;NM_001025105#(-s-:5_C8299146950351);NM_001025105#(f-:5_C2500132456163);tr|H0Y9X2|H0Y9X2_HUMAN;NM_001892#(-s-:5_C7499632610463);NM_001025105#(-s-:5_C7499632610463)	sp|P48729|KC1A_HUMAN	no	no	2,3	2.7771e-42	133.24	10070000
AAQQQEEQEEKEEEDDEQTLHR	K	22	1	2698.16	sp|P78318|IGBP1_HUMAN;NM_001551#(-s-s-:X_I1697678677072);NM_001551#(-s-:X_I9997302201082);NM_001551#(-s-s-s-:X_I7238503077749);NM_001551#(-s-s-:X_I8684941686970)	sp|P78318|IGBP1_HUMAN	yes	no	3,4	1.5076e-84	199.61	316390000
AAQRPLR	M	7	1	810.482	sp|Q8WZ82|OVCA2_HUMAN	sp|Q8WZ82|OVCA2_HUMAN	yes	yes	2	0.045769	64.523	0
AAQSALAAIFNLHLDQTPSR	R	20	0	2123.11	sp|P78563-2|RED1_HUMAN;sp|P78563-4|RED1_HUMAN;tr|G5E9B4|G5E9B4_HUMAN	sp|P78563-2|RED1_HUMAN	no	no	3	1.9154e-08	76.301	10415000
AAQSANISVR	K	10	0	1015.54	NM_000191#(-s-:1_H3470889581381);tr|B1AK13|B1AK13_HUMAN;sp|P35914|HMGCL_HUMAN;NM_000191#(f-:1_H2324843058206);NM_000191#(-t:1_H1603466493335)	NM_000191#(-s-:1_H3470889581381)	yes	no	2	0.00014169	104.43	165880000
AAQSGDYGGAGDDYVLGSLR	K	20	0	1970.9	sp|P35716|SOX11_HUMAN	sp|P35716|SOX11_HUMAN	yes	yes	2	1.0413e-25	120.71	5663800
AAQSLDEMSQTITDLLSEQK	K	20	0	2207.06	NM_001083617#(f-:8_R1870381692367);NM_001083617#(-t:8_R6515559905420);NM_001083617#(f-:8_R1338638851507);NM_001083617#(-s-:8_R5446620880779);NM_014781#(-s-:8_R5446620880779);NM_001083617#(-s-s-:8_R7955468925790);NM_001083617#(-t:8_R626624253764);NM_014781#(-s-s-:8_R7955468925790);sp|Q8TDY2-2|RBCC1_HUMAN;NM_014781#(-t:8_R626624253764);sp|Q8TDY2|RBCC1_HUMAN;NM_001083617#(-s-:8_R506820041730);NM_014…	NM_001083617#(f-:8_R1870381692367)	yes	no	3	6.9584e-06	55.844	7797200
AAQSLLNK	R	8	0	843.481	sp|Q9UMR2|DD19B_HUMAN;tr|H3BQK0|H3BQK0_HUMAN;sp|Q9UMR2-2|DD19B_HUMAN;sp|Q9UMR2-4|DD19B_HUMAN;tr|H3BN59|H3BN59_HUMAN;tr|H3BMQ5|H3BMQ5_HUMAN;sp|Q9NUU7|DD19A_HUMAN;tr|I3L0H8|I3L0H8_HUMAN;NM_018332#(-s-:16_D906701187863);NM_018332#(-s-:16_D8993053210870);NM_018332#(f-:16_D9147864370369);NM_018332#(-s-s-s-s-:16_D3717480476483);NM_018332#(-s-s-s-:16_D5594437121051);NM_018332#(-s-s-s-:16_D7695440403907)…	sp|Q9NUU7|DD19A_HUMAN	no	no	2	0.0039326	93.992	199240000
AAQSTAMNR	R	9	0	948.445	tr|I3L0N3|I3L0N3_HUMAN;NM_006178#(-t:17_N9032861323109);sp|P46459|NSF_HUMAN;NM_006178#(-s-:17_N2264178385255);NM_006178#(f-T:17_N3765403807466);NM_006178#(f-:17_N2792879656788);NM_006178#(-s-:17_N9335534791741);NM_006178#(-s-s-s-:17_N1351898265549);NM_006178#(-s-s-s-:17_N3732831716116);NM_006178#(-s-s-s-s-s-:17_N237467401420);NM_006178#(-s-s-:17_N3871748468190);NM_006178#(-s-s-s-:17_N814179764958…	tr|I3L0N3|I3L0N3_HUMAN	no	no	2	0.00011139	128.38	41052000
AAQTAEDAMQIMEQMTK	K	17	0	1895.84	sp|P30622-1|CLIP1_HUMAN;sp|P30622|CLIP1_HUMAN;tr|F5H0N7|F5H0N7_HUMAN;sp|P30622-2|CLIP1_HUMAN	sp|P30622-1|CLIP1_HUMAN	no	no	2,3	7.0337e-74	252.47	169780000
AAQTAERLDQDINATK	K	16	1	1743.88	NM_004240#(-s-:19_T5791575152992);NM_004240#(-s-:19_T6689019870288);sp|Q15642-2|CIP4_HUMAN;sp|Q15642-4|CIP4_HUMAN;sp|Q15642-3|CIP4_HUMAN;NM_004240#(-s-:19_T8013685337884);NM_004240#(-s-:19_T723999442609);NM_004240#(f-T:19_T9107815032136);NM_004240#(-t:19_T115474718121);NM_004240#(-s-s-:19_T2698110531351);NM_004240#(-s-:19_T1354101877653);NM_004240#(-s-:19_T2466743735392);sp|Q15642-5|CIP4_HUMAN;tr…	sp|Q15642|CIP4_HUMAN	no	no	3	1.2054e-17	128.06	12715000
AAQTAERLDQDINATKADVEK	K	21	2	2286.15	NM_004240#(-s-:19_T5791575152992);NM_004240#(-s-:19_T6689019870288);sp|Q15642-2|CIP4_HUMAN;sp|Q15642-4|CIP4_HUMAN;sp|Q15642-3|CIP4_HUMAN;NM_004240#(-s-:19_T8013685337884);NM_004240#(-s-:19_T723999442609);NM_004240#(f-T:19_T9107815032136);NM_004240#(-t:19_T115474718121);NM_004240#(-s-s-:19_T2698110531351);NM_004240#(-s-:19_T1354101877653);NM_004240#(-s-:19_T2466743735392);sp|Q15642-5|CIP4_HUMAN;tr…	sp|Q15642|CIP4_HUMAN	no	no	3	2.8335e-24	140.73	1493000
AAQTELGQQILADFEEAFPSQGTK	K	24	0	2578.26	sp|Q5VIR6-4|VPS53_HUMAN;tr|G3V0H8|G3V0H8_HUMAN;sp|Q5VIR6-2|VPS53_HUMAN;sp|Q5VIR6|VPS53_HUMAN;NM_001128159#(-s-s-:17_V3126529452510);sp|Q5VIR6-3|VPS53_HUMAN;NM_001128159#(-s-s-s-:17_V1515212637263);tr|F6VX93|F6VX93_HUMAN	sp|Q5VIR6-4|VPS53_HUMAN	yes	no	3	6.536e-68	152.28	62582000
AAQTGQVDGELIR	R	13	0	1356.7	sp|O94964-2|SOGA1_HUMAN;sp|O94964|SOGA1_HUMAN;NM_199181#(-s-s-s-:20_C1252320509013);NM_199181#(-s-s-s-s-:20_C7411618783973);NM_199181#(-s-s-:20_C2828832090277);NM_199181#(-s-:20_C924764856729);NM_199181#(-s-s-:20_C2846795949052);NM_199181#(-s-:20_C2410058166684);NM_199181#(-s-:20_C8248210883360);NM_199181#(-s-s-s-:20_C4133534039376);NM_199181#(-s-:20_C6275062397624);NM_199181#(-s-s-:20_C918491262…	sp|O94964-2|SOGA1_HUMAN	no	no	2	2.223e-06	86.944	1588800
AAQTTIETAIHSLIETLK	K	18	0	1939.06	tr|F5GX82|F5GX82_HUMAN;sp|O94915|FRYL_HUMAN;sp|O94915-2|FRYL_HUMAN	tr|F5GX82|F5GX82_HUMAN	no	no	3	3.3929e-14	95.205	37465000
AAQVAPAAASSLGNPPPPPPSELKK	M	25	1	2394.29	sp|O14497|ARI1A_HUMAN;sp|O14497-2|ARI1A_HUMAN	sp|O14497|ARI1A_HUMAN	yes	no	3	4.8036e-05	78.428	4656300
AAQVAQDEEIAR	R	12	0	1299.64	sp|Q8IVM0|CCD50_HUMAN;NM_174908#(-t:3_C6603160495511);NM_178335#(-t:3_C6603160495511);sp|Q8IVM0-2|CCD50_HUMAN;NM_174908#(f-:3_C7212746410467);NM_178335#(f-:3_C7212746410467);NM_174908#(-t:3_C2855879280680)	sp|Q8IVM0|CCD50_HUMAN	yes	no	2	4.7536e-10	130.16	2702300
AAQVLVQELEQYQLLPK	R	17	0	1969.09	sp|Q9NSI6-3|BRWD1_HUMAN;sp|Q9NSI6-2|BRWD1_HUMAN;sp|Q9NSI6|BRWD1_HUMAN;sp|Q9NSI6-4|BRWD1_HUMAN	sp|Q9NSI6-3|BRWD1_HUMAN	yes	no	2,3	7.2213e-18	101.9	20934000
AAQVMGPPDR	R	10	0	1040.51	sp|Q96I24|FUBP3_HUMAN;NM_003934#(-s-:9_F7864729027559);NM_003934#(-t:9_F2265541653497);NM_003934#(-s-:9_F6802269022990);NM_003934#(-s-:9_F2038649505747);NM_003934#(-s-s-:9_F7332046867436);NM_003934#(-s-:9_F5757339700546);NM_003934#(-s-s-s-s-s-:9_F3362006256360);NM_003934#(-s-s-s-s-s-s-:9_F9933564867139);NM_003934#(-s-s-:9_F2517021588598);NM_003934#(-s-s-s-:9_F2934877282222)	sp|Q96I24|FUBP3_HUMAN	yes	no	2	1.2042e-05	117.7	368430000
AAQVTFR	K	7	0	791.429	sp|Q6PK04|CC137_HUMAN	sp|Q6PK04|CC137_HUMAN	yes	yes	2	0.014246	104.45	0
AAQYGLQLVESQNELQNQLDK	K	21	0	2388.19	NM_017785#(-t:5_C9978864492080);sp|Q96EA4|SPDLY_HUMAN;sp|Q96EA4-2|SPDLY_HUMAN;tr|D6RC83|D6RC83_HUMAN;tr|D6RIF7|D6RIF7_HUMAN;tr|D6RIB8|D6RIB8_HUMAN;tr|D6R936|D6R936_HUMAN;tr|D6REZ1|D6REZ1_HUMAN;tr|D6RCL1|D6RCL1_HUMAN	NM_017785#(-t:5_C9978864492080)	yes	no	3	1.9051e-70	186.56	40828000
AAQYGSMSFNPSTPGASYGPGR	M	22	0	2201.98	sp|Q9NUV9|GIMA4_HUMAN	sp|Q9NUV9|GIMA4_HUMAN	yes	yes	2,3	2.8731e-67	174.2	16827000
AAQYQVNQAAAAQAAATAAAMGIPQAVLPPLPK	K	33	0	3201.7	NM_207295#(-s-s-:3_M560261846861);sp|Q9NR56-3|MBNL1_HUMAN;sp|Q9NR56-4|MBNL1_HUMAN;NM_207296#(-s-S-S-:3_M5096327204201);NM_207296#(-s-S-:3_M1731629923506);sp|Q9NR56-6|MBNL1_HUMAN;sp|Q9NR56-2|MBNL1_HUMAN;sp|Q9NR56-5|MBNL1_HUMAN;tr|H7C4T5|H7C4T5_HUMAN;NM_207297#(-t:3_M4306325314847);NM_207292#(-t:3_M4306325314847);NM_021038#(-t:3_M4306325314847)	NM_207295#(-s-s-:3_M560261846861)	yes	no	3,4,5	7.856e-74	153.06	53566000
AAQYQVNQAAAAQAAATAAAMTQSAVK	K	27	0	2605.29	tr|C9JP00|C9JP00_HUMAN;sp|Q9NR56|MBNL1_HUMAN;tr|Q86VM6|Q86VM6_HUMAN;NM_207293#(-t:3_M4306325314847)	tr|C9JP00|C9JP00_HUMAN	yes	no	3,4	8.6108e-118	183.99	198990000
AAREELLAEFGSGTLDLPALTR	R	22	1	2329.23	sp|P58107|EPIPL_HUMAN	sp|P58107|EPIPL_HUMAN	yes	no	3	3.6268e-11	104.81	4542900
AAREPNIDR	R	9	1	1040.54	sp|P23588|IF4B_HUMAN;tr|E7EX17|E7EX17_HUMAN;NM_001417#(-s-:12_E7576148076352);NM_001417#(-t:12_E6604288266484);tr|B4DS13|B4DS13_HUMAN;NM_001417#(f-t:12_E6581001544879);NM_001417#(f-:12_E5626614672009);NM_001417#(-s-:12_E829998108359);NM_001417#(f-T:12_E1853882373567);NM_001417#(f-:12_E561371211535);NM_001417#(r:12_E3523557290232);NM_001417#(-s-s-:12_E4437072712038);NM_001417#(-t:12_E1806802541409…	sp|P23588|IF4B_HUMAN	no	no	3	0.001569	80.758	21497000
AARPEIADR	K	9	1	997.53	sp|Q96GM8|TOE1_HUMAN;NM_025077#(r:1_T227925540115);tr|B4DEM6|B4DEM6_HUMAN	sp|Q96GM8|TOE1_HUMAN	yes	no	3	0.042535	38.238	2976100
AASAAAAELQASGGPR	M	16	0	1426.72	sp|Q9HCN4|GPN1_HUMAN;tr|B4DQM4|B4DQM4_HUMAN;tr|F8WD09|F8WD09_HUMAN	sp|Q9HCN4|GPN1_HUMAN	yes	no	2	7.9875e-20	141	33484000
AASAAAASAAAASAASGSPGPGEGSAGGEK	M	30	0	2386.1	NM_005762#(-t:19_T7498049120686);sp|Q13263|TIF1B_HUMAN;NM_005762#(-t:19_T390787060278);NM_005762#(r:19_T1538596965574);NM_005762#(-s-:19_T4573109733984);NM_005762#(-t:19_T7892474544205);NM_005762#(-t:19_T8850029060752);sp|Q13263-2|TIF1B_HUMAN;NM_005762#(-s-:19_T334738968231);NM_005762#(-s-s-:19_T518602058769);NM_005762#(r:19_T7951061793908);NM_005762#(-t:19_T3056677619040);NM_005762#(f-:19_T54362…	NM_005762#(-t:19_T7498049120686)	no	no	2,3	7.5222e-170	272.2	1459700000
AASAAAASAAAASAASGSPGPGEGSAGGEKR	M	31	1	2542.2	NM_005762#(-t:19_T7498049120686);sp|Q13263|TIF1B_HUMAN;NM_005762#(-t:19_T390787060278);NM_005762#(r:19_T1538596965574);NM_005762#(-s-:19_T4573109733984);NM_005762#(-t:19_T7892474544205);NM_005762#(-t:19_T8850029060752);sp|Q13263-2|TIF1B_HUMAN;NM_005762#(-s-:19_T334738968231);NM_005762#(-s-s-:19_T518602058769);NM_005762#(r:19_T7951061793908);NM_005762#(-t:19_T3056677619040);NM_005762#(f-:19_T54362…	NM_005762#(-t:19_T7498049120686)	no	no	2,3,4	3.0734e-63	181.56	190810000
AASAAFQENVGR	R	12	0	1219.59	NM_005993#(-s-:17_T612768256857);NM_005993#(-s-:17_T1172702066093);NM_005993#(-s-s-s-s-s-:17_T1235149621010);NM_005993#(-s-s-:17_T3098415167357);NM_005993#(-s-s-s-:17_T4750240288527);NM_005993#(-s-s-:17_T6420518399034);NM_005993#(-s-s-s-s-:17_T1179606468128);NM_005993#(-s-s-s-:17_T2417666157774);NM_005993#(-t:17_T2893905012088);NM_005993#(-s-s-s-:17_T509373717013);NM_005993#(-s-s-s-s-:17_T5317611…	NM_005993#(-s-:17_T612768256857)	no	no	2	1.9345e-17	205.56	633150000
AASAAGAAGSAGGSSGAAGAAGGGAGAGTR	R	30	0	2174.01	sp|Q9UKY7|CDV3_HUMAN;NM_001134422#(f-:3_C6190994462737);NM_017548#(-t:3_C7023537611016);sp|Q9UKY7-2|CDV3_HUMAN;NM_017548#(-t:3_C624029773546);NM_001134422#(-t:3_C624029773546)	sp|Q9UKY7|CDV3_HUMAN	no	no	3	1.1192e-05	73.936	1245900
AASAAGAAGSAGGSSGAAGAAGGGAGAGTRPGDGGTASAGAAGPGAATK	R	49	1	3668.71	sp|Q9UKY7|CDV3_HUMAN;NM_001134422#(f-:3_C6190994462737);NM_017548#(-t:3_C7023537611016);sp|Q9UKY7-2|CDV3_HUMAN;NM_017548#(-t:3_C624029773546);NM_001134422#(-t:3_C624029773546)	sp|Q9UKY7|CDV3_HUMAN	no	no	3,4,5	2.5774e-14	101.77	57592000
AASAAGVPLEASGEQVR	K	17	0	1611.82	NM_001112726#(-s-:14_K5289273041802);sp|Q9Y4F5-2|C170B_HUMAN;sp|Q9Y4F5|C170B_HUMAN;tr|J3KQR7|J3KQR7_HUMAN;NM_001112726#(-s-s-:14_K7821319809838);NM_001112726#(-s-:14_K2192924884585);NM_001112726#(-s-:14_K4102412314664);NM_015005#(-s-:14_K5289273041802);tr|E9PFC1|E9PFC1_HUMAN;sp|Q9Y4F5-3|C170B_HUMAN;NM_015005#(-s-s-:14_K7821319809838);NM_015005#(-s-:14_K2192924884585);NM_015005#(-s-:14_K4102412314…	NM_001112726#(-s-:14_K5289273041802)	no	no	2	1.09e-19	120.63	7032100
AASAATAAPTATPAAQESGTIPK	R	23	0	2082.06	sp|O00116|ADAS_HUMAN;NM_003659#(-t:2_A8252020608498);tr|B8ZZ81|B8ZZ81_HUMAN	sp|O00116|ADAS_HUMAN	yes	no	2,3	4.3839e-84	187.43	171810000
AASADSTTEGTPADGFTVLSTK	K	22	0	2126	NM_138609#(-t:5_H1419123703431);sp|O75367-2|H2AY_HUMAN;NM_138609#(f-T:5_H6589467133092);NM_138609#(-t:5_H7740077053441);NM_138609#(-t:5_H846874551357);NM_138609#(-s-:5_H8822530136661);NM_138609#(f-T:5_H332045624847);NM_138609#(f-:5_H9700467179773);NM_138609#(-t:5_H4542534905881);NM_138609#(-s-e-s-:5_H4342456752640);NM_138609#(-t:5_H1954705696154);NM_001040158#(-t:5_H1954705696154);NM_138610#(-t:5…	NM_138610#(-t:5_H1419123703431)	no	no	2,3,4	1.2756e-83	183.06	2689300000
AASADSTTEGTPADGFTVLSTKSLFLGQK	K	29	1	2899.45	NM_138609#(-t:5_H1419123703431);sp|O75367-2|H2AY_HUMAN;NM_138609#(f-T:5_H6589467133092);NM_138609#(-t:5_H7740077053441);NM_138609#(-t:5_H846874551357);NM_138609#(-s-:5_H8822530136661);NM_138609#(f-T:5_H332045624847);NM_138609#(f-:5_H9700467179773);NM_138609#(-t:5_H4542534905881);NM_138609#(-s-e-s-:5_H4342456752640);NM_138609#(-t:5_H1954705696154);NM_001040158#(-t:5_H1954705696154);NM_138610#(-t:5…	NM_138610#(-t:5_H1419123703431)	no	no	3	9.8483e-08	81.315	1519300
AASAFFTYVSLSQEGR	R	16	0	1732.84	tr|B4DUX0|B4DUX0_HUMAN;NM_181864#(f-T:1_A7229684852446);sp|O00154-4|BACH_HUMAN;NM_181866#(-s-:1_A731543979299);NM_181866#(f-:1_A9123680751275);sp|O00154-6|BACH_HUMAN;NM_181866#(-t:1_A2525497519355);NM_007274#(-s-:1_A731543979299);NM_181864#(-s-:1_A731543979299);NM_181865#(-t:1_A2525497519355);NM_007274#(f-:1_A9123680751275);NM_007274#(-t:1_A2525497519355);NM_181864#(f-:1_A9123680751275);sp|O00154…	sp|O00154-4|BACH_HUMAN	no	no	2,3	1.2698e-49	218.28	285240000
AASAGEQLELEK	K	12	0	1244.62	NM_006642#(-s-s-s-s-:1_S7653341184284);NM_006642#(-s-s-s-:1_S1780765902471);tr|A6NCS9|A6NCS9_HUMAN;NM_006642#(-t:1_S4465366777581);NM_006642#(-s-s-:1_S1392240685131);NM_006642#(-s-:1_S264808864130);NM_006642#(-s-:1_S5091498831193);NM_006642#(-s-:1_S8605534565959);sp|Q86SQ7|SDCG8_HUMAN;NM_006642#(f-:1_S3373234995418);NM_006642#(-t:1_S6560050672370);NM_006642#(f-T:1_S4134491526979);sp|Q86SQ7-2|SDCG…	NM_006642#(-s-s-s-s-:1_S7653341184284)	yes	no	2	6.6966e-10	128.68	39398000
AASAGQEPLHNEELAGAGR	R	19	0	1876.9	NM_023935#(-s-:20_C177885303946);sp|Q96HY6|DDRGK_HUMAN;NM_023935#(-s-s-:20_C587492402276);NM_023935#(-s-:20_C8383350484106);NM_023935#(-s-:20_C9285868410242);NM_023935#(r:20_C3132275469267);NM_023935#(-t:20_C1377829025870);sp|Q96HY6-2|DDRGK_HUMAN;NM_023935#(-s-s-s-:20_C3592271940955);NM_023935#(-s-s-:20_C3504288805995);NM_023935#(f-:20_C3111214517872)	NM_023935#(-s-:20_C177885303946)	yes	no	3	2.0805e-36	144.68	441760000
AASAGVPYHGEVPVSLAR	K	18	0	1779.93	sp|O15020|SPTN2_HUMAN;sp|O15020-2|SPTN2_HUMAN	sp|O15020|SPTN2_HUMAN	yes	no	2,3	1.1895e-06	71.376	234250000
AASAHAIGTVK	R	11	0	1024.57	sp|P31323|KAP3_HUMAN;NM_002736#(r:7_P2547809096757)	sp|P31323|KAP3_HUMAN	yes	no	2,3	2.3403e-05	113.38	51778000
AASALYACTK	M	10	0	1054.51	tr|B2R9C2|B2R9C2_HUMAN;sp|Q5HYJ3-2|FA76B_HUMAN;tr|F5GX09|F5GX09_HUMAN;sp|Q5HYJ3|FA76B_HUMAN;tr|F5H5F4|F5H5F4_HUMAN	tr|B2R9C2|B2R9C2_HUMAN	yes	no	2	0.0014839	76.682	2467400
AASAPYFEVLEK	K	12	0	1323.67	NM_006659#(-s-:10_T3421390553418);sp|Q9BSJ2|GCP2_HUMAN;NM_006659#(f-:10_T7505837380694);sp|Q9BSJ2-4|GCP2_HUMAN;NM_006659#(-s-:10_T8389784734542);NM_006659#(-t:10_T4208749702613);NM_006659#(-s-:10_T2937554999797);tr|F2Z2B9|F2Z2B9_HUMAN;sp|Q9BSJ2-3|GCP2_HUMAN;NM_006659#(f-:10_T1050577504544)	NM_006659#(-s-:10_T3421390553418)	yes	no	2,3	5.7104e-05	78.964	428860000
AASASSVHVPVSALGAGSAATAASEEMYVPR	R	31	0	2943.44	NM_001099271#(-s-s-:5_C6949406157457);tr|D6RDG4|D6RDG4_HUMAN;sp|Q8NA72-3|POC5_HUMAN;sp|Q8NA72|POC5_HUMAN;NM_152408#(-s-:5_C4446896505989);NM_001099271#(-s-:5_C4446896505989)	NM_001099271#(-s-s-:5_C6949406157457)	yes	no	3	1.9347e-05	57.347	17425000
AASAYAVGDVK	R	11	0	1050.53	sp|P13861|KAP2_HUMAN;tr|Q9BUB1|Q9BUB1_HUMAN;NM_004157#(-s-s-:3_P1047678238529);NM_004157#(-s-:3_P9727196891810);NM_004157#(-s-:3_P1595865452945);NM_004157#(-t:3_P2041256174050);tr|H7C330|H7C330_HUMAN	sp|P13861|KAP2_HUMAN	yes	no	2	0.00015719	81.92	348730000
AASCVLLHTGQK	M	12	0	1283.67	sp|P14550|AK1A1_HUMAN;NM_153326#(-s-:1_A3408350034347);tr|Q5T621|Q5T621_HUMAN	sp|P14550|AK1A1_HUMAN	yes	no	2	8.3333e-18	217.22	3460900000
AASDELSK	K	8	0	819.397	NM_003373#(-s-:10_V7808343453743);NM_014000#(-s-:10_V7808343453743);NM_003373#(-s-s-:10_V4946397173805);NM_014000#(-s-s-:10_V4946397173805);NM_003373#(-s-s-s-:10_V7544549772803);NM_014000#(-s-s-s-:10_V7544549772803);NM_003373#(-s-s-s-s-:10_V9783051377797);NM_014000#(-s-s-s-s-:10_V9783051377797);NM_003373#(-s-s-s-s-s-:10_V2193193708518);NM_014000#(-s-s-s-s-s-:10_V2193193708518);tr|Q5JQ13|Q5JQ13_HU…	sp|P18206-2|VINC_HUMAN	no	no	2	0.006307	80.219	2714300
AASDELSKTISPMVMDAK	K	18	1	1892.92	NM_003373#(-s-:10_V7808343453743);NM_014000#(-s-:10_V7808343453743);NM_003373#(-s-s-:10_V4946397173805);NM_014000#(-s-s-:10_V4946397173805);NM_003373#(-s-s-s-:10_V7544549772803);NM_014000#(-s-s-s-:10_V7544549772803);NM_003373#(-s-s-s-s-:10_V9783051377797);NM_014000#(-s-s-s-s-:10_V9783051377797);NM_003373#(-s-s-s-s-s-:10_V2193193708518);NM_014000#(-s-s-s-s-s-:10_V2193193708518);tr|Q5JQ13|Q5JQ13_HU…	sp|P18206-2|VINC_HUMAN	no	no	3	0.00017564	67.418	180880
AASDIAMTELPPTHPIR	K	17	0	1818.93	sp|P62258|1433E_HUMAN;NM_006761#(-t:17_Y4032924005917);NM_006761#(-t:17_Y3778431063895);NM_006761#(f-T:17_Y3171737188806);NM_006761#(f-:17_Y2132266236782);NM_006761#(-t:17_Y3144314746492);NM_006761#(-s-:17_Y9366402543699);NM_006761#(f-T:17_Y2652305168291);NM_006761#(f-:17_Y1165115847762);NM_006761#(-s-:17_Y3135501727585);NM_006761#(f-:17_Y6037127257022);NM_006761#(f-T:17_Y8510200334511);sp|P62258…	sp|P62258|1433E_HUMAN	yes	no	2,3,4	6.8243e-46	207.66	6761700000
AASDIWKPVLSIDTEPR	K	17	1	1896.99	sp|Q96JM3|CHAP1_HUMAN	sp|Q96JM3|CHAP1_HUMAN	yes	yes	2,3	5.0748e-43	200.48	533910000
AASDLMSYCEQHAR	K	14	0	1637.69	sp|O60262|GBG7_HUMAN	sp|O60262|GBG7_HUMAN	yes	yes	3	1.3624e-06	73.927	11758000
AASDPLLSSVSPAVSK	R	16	0	1527.81	NM_006521#(-t:X_T5628324615804);sp|P19532|TFE3_HUMAN	NM_006521#(-t:X_T5628324615804)	yes	no	2	4.7827e-06	74.726	37965000
AASEAAVVSSPSLK	M	14	0	1315.7	sp|Q8WWH5|TRUB1_HUMAN;NM_139169#(-t:10_T6851147676885);NM_139169#(-s-:10_T9147229742317);NM_139169#(-t:10_T7256044149091)	sp|Q8WWH5|TRUB1_HUMAN	yes	no	2	8.7345e-10	130.1	11492000
AASEAPEEEVSLPWVHLAYQR	K	21	0	2381.17	sp|Q63HN8|RN213_HUMAN;sp|Q63HN8-4|RN213_HUMAN;tr|H3BLU6|H3BLU6_HUMAN;NM_020914#(f-T:17_R1117331555028);NM_020914#(f-:17_R8579862724701);NM_020914#(-t:17_R8263469212057)	sp|Q63HN8|RN213_HUMAN	yes	no	2,3	2.2274e-43	130.56	106520000
AASEDMTSDEER	R	12	0	1339.52	tr|I3L2J0|I3L2J0_HUMAN;NM_015125#(-t-f-:19_C4630965006976);NM_015125#(-t:19_C9407119389799);NM_015125#(-t:19_C7403909956233);NM_015125#(-t:19_C6537658432738);NM_015125#(-t:19_C3673869935984);sp|Q96RK0|CIC_HUMAN;NM_015125#(r:19_C379517286948);NM_015125#(r:19_C5241536006723)	tr|I3L2J0|I3L2J0_HUMAN	yes	no	2	1.8301e-15	180.2	1065800
AASEELLEK	K	9	0	988.508	tr|F8VY01|F8VY01_HUMAN;sp|Q6ZV73-2|FGD6_HUMAN;sp|Q6ZV73|FGD6_HUMAN	tr|F8VY01|F8VY01_HUMAN	yes	no	2	0.056472	41.448	8718100
AASEFILGK	K	9	0	934.512	sp|Q8IXQ6-2|PARP9_HUMAN;NM_031458#(-t-f-:3_P2455930718191);sp|Q8IXQ6-3|PARP9_HUMAN	sp|Q8IXQ6-2|PARP9_HUMAN	no	no	2	0.057805	43.308	3131400
AASELYSPLSGEVTEINEALAENPGLVNK	K	29	0	3014.51	sp|P23434|GCSH_HUMAN;tr|H3BNV1|H3BNV1_HUMAN	sp|P23434|GCSH_HUMAN	yes	no	3	0.022771	27.617	13793000
AASEQYIDTEK	K	11	0	1253.58	sp|Q9NZM3-2|ITSN2_HUMAN;sp|Q9NZM3|ITSN2_HUMAN;tr|H7C3E2|H7C3E2_HUMAN	sp|Q9NZM3-2|ITSN2_HUMAN	yes	no	2	5.2274e-12	178.67	11243000
AASEWLLR	R	8	0	944.508	NM_001003805#(-s-e-e-s-:14_A5756564060715);sp|Q99766|ATP5S_HUMAN;tr|Q8WXQ4|Q8WXQ4_HUMAN;NM_001003805#(f-:14_A2953037460125);NM_015684#(f-:14_A2953037460125);sp|Q99766-3|ATP5S_HUMAN;sp|Q99766-2|ATP5S_HUMAN	NM_001003805#(-s-e-e-s-:14_A5756564060715)	yes	no	2	0.0013962	119.29	23141000
AASGAVEPGPPGAAVAPSPAPAPPPAPDHLFR	M	32	0	2968.52	sp|O75312|ZPR1_HUMAN;NM_003904#(f-T:11_Z3310859331294);tr|H7BZM7|H7BZM7_HUMAN;NM_003904#(-t:11_Z1103198030007);NM_003904#(f-T:11_Z3392586431016);NM_003904#(f-T:11_Z1286747487525);NM_003904#(-t:11_Z4648760806466);NM_003904#(f-t:11_Z9555456590358);NM_003904#(-t:11_Z4928852569900);NM_003904#(-t:11_Z8050913083899);tr|F8WBC5|F8WBC5_HUMAN	sp|O75312|ZPR1_HUMAN	yes	no	3	4.7607e-13	92.231	51615000
AASGFISPLSAECMLQYK	K	18	0	1971.94	sp|Q6ZMI0|PPR21_HUMAN;sp|Q6ZMI0-2|PPR21_HUMAN;sp|Q6ZMI0-5|PPR21_HUMAN;sp|Q6ZMI0-3|PPR21_HUMAN	sp|Q6ZMI0|PPR21_HUMAN	yes	no	2,3	7.0623e-09	79.514	188050000
AASGFNAMEDAQTLR	K	15	0	1580.73	NM_001153#(-s-:2_A1121853929828);sp|P09525|ANXA4_HUMAN;tr|Q6P452|Q6P452_HUMAN;NM_001153#(f-:2_A1391674170501);NM_001153#(-s-:2_A1476443936251);NM_001153#(-s-s-s-:2_A4428476936553);NM_001153#(-s-s-:2_A1586294476325);NM_001153#(-s-:2_A821981348207)	NM_001153#(-s-:2_A1121853929828)	yes	no	2,3	6.2878e-32	178.68	3043900000
AASGFNAMEDAQTLRK	K	16	1	1708.82	NM_001153#(-s-:2_A1121853929828);sp|P09525|ANXA4_HUMAN;tr|Q6P452|Q6P452_HUMAN;NM_001153#(f-:2_A1391674170501);NM_001153#(-s-:2_A1476443936251);NM_001153#(-s-s-s-:2_A4428476936553);NM_001153#(-s-s-:2_A1586294476325);NM_001153#(-s-:2_A821981348207)	NM_001153#(-s-:2_A1121853929828)	yes	no	2,3	1.0233e-42	203.2	46979000
AASGLLSIGLCK	K	12	0	1188.65	tr|B4DHT5|B4DHT5_HUMAN;sp|Q96CM8|ACSF2_HUMAN;NM_025149#(f-:17_A2695724175323);tr|B4DFQ6|B4DFQ6_HUMAN;NM_025149#(r:17_A8152728163985);NM_025149#(-s-:17_A265819210033);NM_025149#(-s-:17_A3904498892573);tr|D6RF87|D6RF87_HUMAN	tr|B4DHT5|B4DHT5_HUMAN	yes	no	2	5.9065e-05	81.676	18123000
AASGTTGTYQEWK	K	13	0	1398.64	sp|P04114|APOB_HUMAN;NM_000384#(r:2_A5993527659098)	sp|P04114|APOB_HUMAN	yes	no	2	4.5217e-17	174.05	22425000
AASGYPVKVPLEVQEADEAK	R	20	1	2100.07	NM_006295#(-s-:6_V8182826889598);sp|P26640|SYVC_HUMAN;NM_006295#(r:6_V9056324370519);NM_006295#(r:6_V7400074234572);NM_006295#(-s-s-:6_V3920643264486);NM_006295#(-s-:6_V6624901368038);NM_006295#(-s-:6_V8514538969654);tr|B0V043|B0V043_HUMAN;NM_006295#(-s-s-s-:6_V482308456168);NM_006295#(-s-s-:6_V3910920557540);NM_006295#(-s-s-:6_V9530260762355);NM_006295#(-s-:6_V429328149341);NM_006295#(-s-s-s-s-:…	NM_006295#(-s-:6_V8182826889598)	yes	no	3,4	4.0577e-34	146.97	46359000
AASGYPVKVPLEVQEADEAKLQQTEAELR	R	29	2	3168.63	NM_006295#(-s-:6_V8182826889598);sp|P26640|SYVC_HUMAN;NM_006295#(r:6_V9056324370519);NM_006295#(r:6_V7400074234572);NM_006295#(-s-s-:6_V3920643264486);NM_006295#(-s-:6_V6624901368038);NM_006295#(-s-:6_V8514538969654);tr|B0V043|B0V043_HUMAN;NM_006295#(-s-s-s-:6_V482308456168);NM_006295#(-s-s-:6_V3910920557540);NM_006295#(-s-s-:6_V9530260762355);NM_006295#(-s-:6_V429328149341);NM_006295#(-s-s-s-s-:…	NM_006295#(-s-:6_V8182826889598)	yes	no	4	7.1412e-07	78.913	424810
AASHEQAAAALK	R	12	0	1166.6	sp|Q12959-4|DLG1_HUMAN;sp|Q12959-2|DLG1_HUMAN;NM_004087#(f-T:3_D5642333397432);sp|Q12959-5|DLG1_HUMAN;sp|Q12959-3|DLG1_HUMAN;sp|Q12959-6|DLG1_HUMAN;NM_001098424#(-t:3_D8568313907945);sp|Q12959|DLG1_HUMAN;sp|Q12959-7|DLG1_HUMAN;NM_001098424#(f-T:3_D5642333397432);sp|Q12959-8|DLG1_HUMAN;NM_004087#(f-:3_D706756460649);NM_004087#(r:3_D6103895070757);sp|Q12959-9|DLG1_HUMAN;NM_001098424#(f-:3_D70675646…	sp|Q12959-4|DLG1_HUMAN	yes	no	3	5.035e-14	145.29	0
AASHVLQTVWSYK	K	13	0	1488.77	tr|C9JJX6|C9JJX6_HUMAN;sp|O00192-2|ARVC_HUMAN;tr|E9PDC3|E9PDC3_HUMAN;sp|O00192|ARVC_HUMAN	tr|C9JJX6|C9JJX6_HUMAN	yes	no	3	4.9687e-07	88.092	8924400
AASIENVLQDSSPEHCGR	R	18	0	1968.9	NM_015246#(-s-s-s-:16_M1962414492082);NM_015246#(-s-s-:16_M5203831978982);sp|O60291|MGRN1_HUMAN;NM_015246#(-s-:16_M2335358275594);NM_015246#(-s-:16_M3871917110172);sp|O60291-2|MGRN1_HUMAN;tr|K7EPJ5|K7EPJ5_HUMAN;sp|O60291-4|MGRN1_HUMAN;tr|E9PB19|E9PB19_HUMAN;sp|O60291-3|MGRN1_HUMAN;NM_015246#(-t:16_M9639691740780);NM_015246#(-s-s-:16_M3001922070854);NM_015246#(f-:16_M3040644795580);NM_015246#(-s-:…	NM_015246#(-s-s-s-:16_M1962414492082)	yes	no	3	2.454e-13	86.8	5224300
AASIFGGAK	R	9	0	820.444	sp|P23588|IF4B_HUMAN;tr|E7EX17|E7EX17_HUMAN;NM_001417#(-s-:12_E7576148076352);NM_001417#(-t:12_E6604288266484);tr|B4DS13|B4DS13_HUMAN;NM_001417#(f-t:12_E6581001544879);NM_001417#(f-:12_E5626614672009);NM_001417#(-s-:12_E829998108359);NM_001417#(f-T:12_E1853882373567);NM_001417#(f-:12_E561371211535);NM_001417#(r:12_E3523557290232);NM_001417#(-s-s-:12_E4437072712038);NM_001417#(-t:12_E1806802541409…	sp|P23588|IF4B_HUMAN	no	no	2	0.0013105	93.267	403660000
AASIFGGAKPVDTAAR	R	16	1	1530.82	sp|P23588|IF4B_HUMAN;tr|E7EX17|E7EX17_HUMAN;NM_001417#(-s-:12_E7576148076352);NM_001417#(-t:12_E6604288266484);tr|B4DS13|B4DS13_HUMAN;NM_001417#(f-t:12_E6581001544879);NM_001417#(f-:12_E5626614672009);NM_001417#(-s-:12_E829998108359);NM_001417#(f-T:12_E1853882373567);NM_001417#(f-:12_E561371211535);NM_001417#(r:12_E3523557290232);NM_001417#(-s-s-:12_E4437072712038);NM_001417#(-t:12_E1806802541409…	sp|P23588|IF4B_HUMAN	no	no	2,3	4.9837e-42	197.47	1305500000
AASITSEVFNK	K	11	0	1165.6	sp|Q9Y5B9|SP16H_HUMAN;NM_007192#(-s-:14_S2655773662227);NM_007192#(-s-:14_S4028929491963);NM_007192#(-s-:14_S6234886541315);NM_007192#(-s-s-:14_S7346464318253)	sp|Q9Y5B9|SP16H_HUMAN	yes	no	2,3	2.7477e-06	119.27	1622000000
AASITSEVFNKFFK	K	14	1	1587.83	sp|Q9Y5B9|SP16H_HUMAN;NM_007192#(-s-:14_S2655773662227);NM_007192#(-s-:14_S4028929491963);NM_007192#(-s-:14_S6234886541315);NM_007192#(-s-s-:14_S7346464318253)	sp|Q9Y5B9|SP16H_HUMAN	yes	no	3	0.0019962	59.75	4257400
AASIYSSWAEEQR	R	13	0	1496.69	sp|Q92538|GBF1_HUMAN;NM_004193#(f-T:10_G7446182588923);NM_004193#(-s-:10_G6458607998957);NM_004193#(-s-:10_G1642007098371);NM_004193#(-s-:10_G2110147888736);NM_004193#(f-:10_G5119565845322);NM_004193#(r:10_G1630319440314);NM_004193#(r:10_G1547905995979);NM_004193#(r:10_G34881874267);NM_004193#(r:10_G1178040387831);NM_004193#(f-:10_G6558085707830);NM_004193#(-t:10_G9279335454427)	sp|Q92538|GBF1_HUMAN	yes	no	2,3	1.0484e-17	191.79	267180000
AASKPVEAAVVAAAVPSSGSGVGGGGTAGPGTGGLPR	M	37	1	3116.62	sp|O94826|TOM70_HUMAN	sp|O94826|TOM70_HUMAN	yes	yes	3,4	6.3755e-10	113.32	8588000
AASLEAVSYAIDTLK	R	15	0	1550.82	sp|O96007|MOC2B_HUMAN	sp|O96007|MOC2B_HUMAN	yes	yes	2,3	4.388e-32	174.95	304370000
AASLELSEVKK	K	11	1	1173.66	NM_005895#(-s-:12_G9434437563236);sp|Q08378|GOGA3_HUMAN;NM_005895#(-s-:12_G9476322100055);NM_005895#(-s-:12_G3915191437937);NM_005895#(-s-s-:12_G7652489137390);sp|Q08378-2|GOGA3_HUMAN;NM_005895#(-s-:12_G4252659734859);NM_005895#(-s-:12_G6837717700492);NM_005895#(-s-s-s-s-:12_G5752248524300);NM_005895#(-s-s-s-:12_G9458646806657);NM_005895#(-s-s-:12_G9867954749420);NM_005895#(-s-:12_G7943781607943)…	NM_005895#(-s-:12_G9434437563236)	yes	no	3	0.02529	54.772	9084600
AASLEYDYETIR	K	12	0	1429.67	sp|Q96N66|MBOA7_HUMAN;sp|Q96N66-2|MBOA7_HUMAN;NM_024298#(-t:19_M8885683792125);NM_024298#(-s-:19_M7462236415833);sp|Q96N66-3|MBOA7_HUMAN;NM_024298#(-s-:19_M387600688680)	sp|Q96N66|MBOA7_HUMAN	yes	no	2,3	2.4425e-16	187.85	1432900000
AASLGCNNKPAFPELDFR	K	18	1	2005.97	sp|Q8IYB1|M21D2_HUMAN;NM_178496#(f-:3_C3234502153531)	sp|Q8IYB1|M21D2_HUMAN	yes	no	3	1.2141e-06	85.087	140970000
AASLGLLQFPILNASVDENCQNITYK	K	26	0	2878.45	sp|P11182|ODB2_HUMAN;NM_001918#(-s-:1_D1766816537740);NM_001918#(-s-:1_D2539850554735)	sp|P11182|ODB2_HUMAN	no	no	3,4	1.8696e-103	186.82	280770000
AASLGSSQSSR	K	11	0	1049.51	NM_001750#(-t:5_C1186328863334);NM_001042442#(-t:5_C1186328863334);NM_001042441#(-t:5_C1186328863334);NM_001042440#(-t:5_C1186328863334)	NM_001750#(-t:5_C1186328863334)	no	no	2	1.6816e-11	185.77	192220000
AASLHWTSER	K	10	0	1156.56	tr|E9PIC0|E9PIC0_HUMAN;sp|O14521|DHSD_HUMAN;tr|H0YD96|H0YD96_HUMAN;tr|H0YD41|H0YD41_HUMAN;tr|G3V173|G3V173_HUMAN;NM_003002#(f-:11_S5708773412754);tr|E9PK73|E9PK73_HUMAN;NM_003002#(f-:11_S6627454733350);tr|H3BRW5|H3BRW5_HUMAN;tr|E9PIG3|E9PIG3_HUMAN	tr|E9PIC0|E9PIC0_HUMAN	yes	no	2,3	6.74e-08	138.36	1358200000
AASLKSNYNTSSGWIR	K	16	1	1753.87	NM_000968#(-s-s-:15_R8014001720958)	NM_000968#(-s-s-:15_R8014001720958)	yes	yes	3	0.0072361	48.405	35703000
AASLTMHFR	R	9	0	1032.52	sp|O15061|SYNEM_HUMAN;sp|O15061-2|SYNEM_HUMAN;sp|O15061-3|SYNEM_HUMAN;tr|C9JIE4|C9JIE4_HUMAN	sp|O15061|SYNEM_HUMAN	no	no	3	0.083194	46.819	1372600
AASMDPPRATEPVATSNPAGDPVGSTR	K	27	1	2651.26	sp|Q27J81-2|INF2_HUMAN;NM_001031714#(f-T:14_I3111801203216);sp|Q27J81|INF2_HUMAN;NM_022489#(f-T:14_I3111801203216)	sp|Q27J81-2|INF2_HUMAN	yes	no	3	1.2927e-07	83.647	2419300
AASMSAFDPLK	M	11	0	1136.55	NM_001007565#(f-:3_T243937707082)	NM_001007565#(f-:3_T243937707082)	yes	yes	2	8.4791e-05	94.767	354320000
AASMSAFDPLKNQDEINK	M	18	1	1977.95	NM_001007565#(f-:3_T243937707082)	NM_001007565#(f-:3_T243937707082)	yes	yes	3	0.080256	26.837	3837400
AASNCGIVESILNWVK	K	16	0	1759.89	sp|Q02880|TOP2B_HUMAN;NM_001068#(-s-:3_T6000493773770);NM_001068#(-s-s-:3_T1705382432172);sp|Q02880-2|TOP2B_HUMAN;NM_001068#(-s-:3_T7421638584290);NM_001068#(f-T:3_T1623536598915);NM_001068#(f-:3_T8181709003938);NM_001068#(-t:3_T6549937868019);tr|E9PCY5|E9PCY5_HUMAN;NM_001068#(-t:3_T2291546582003);NM_001068#(f-:3_T1160921216758)	sp|Q02880|TOP2B_HUMAN	no	no	3	7.6107e-07	72.315	16330000
AASNIIFSNGNLDPWAGGGIR	R	21	0	2129.07	NM_013379#(-t:9_D8504672763612);sp|Q9UHL4|DPP2_HUMAN;NM_013379#(rr:9_D2408668798185);NM_013379#(-s-s-:9_D4707359469388);NM_013379#(-s-:9_D9611814607242);NM_013379#(rr:9_D7676212319055)	NM_013379#(-t:9_D8504672763612)	yes	no	2,3	5.2933e-33	124.08	203530000
AASNMALGK	R	9	0	861.438	tr|H0YDU8|H0YDU8_HUMAN;sp|P53041|PPP5_HUMAN;NM_006247#(-s-:19_P5560250000778);NM_006247#(-t:19_P4569153245597);NM_006247#(f-T:19_P4021230575147);NM_006247#(f-:19_P650717248070);NM_006247#(-s-s-:19_P2171310558227);NM_006247#(-s-s-:19_P7581950786608);NM_006247#(-s-:19_P9373188573850);NM_006247#(-s-s-s-:19_P8195960098401);NM_006247#(-s-:19_P8893709917441);NM_006247#(-s-s-:19_P9674311388635);NM_00624…	tr|H0YDU8|H0YDU8_HUMAN	yes	no	2	0.00098957	105.1	66562000
AASPAKPSSLDLVPNLPK	R	18	1	1804.01	sp|Q8N3V7-2|SYNPO_HUMAN;sp|Q8N3V7-3|SYNPO_HUMAN;sp|Q8N3V7|SYNPO_HUMAN	sp|Q8N3V7-2|SYNPO_HUMAN	yes	no	3	0.00066464	61.87	8867000
AASPLGSPELCPSALHGLSQAMK	K	23	0	2321.15	sp|Q5VW36|FOCAD_HUMAN;NM_017794#(-t:9_K7859776454614)	sp|Q5VW36|FOCAD_HUMAN	yes	no	3	6.9118e-54	142.45	203410000
AASPQDLAGGYTSSLACHR	R	19	0	1960.91	NM_002431#(f-T:14_M1741397559032);NM_002431#(f-:14_M6977378256092);NM_002431#(-t:14_M9962462077350);sp|P51948|MAT1_HUMAN;tr|G3V1U8|G3V1U8_HUMAN;NM_002431#(-t:14_M724766603416);NM_002431#(-s-:14_M7864960395408);tr|H0YJ92|H0YJ92_HUMAN;NM_002431#(-s-:14_M2977692320978);NM_002431#(-s-s-:14_M9716565733767)	NM_002431#(f-T:14_M1741397559032)	yes	no	3	4.2225e-13	84.581	148900000
AASQAVEEMR	M	10	0	1090.51	sp|O15160|RPAC1_HUMAN;NM_203290#(-t:6_P3287661565136);sp|O15160-2|RPAC1_HUMAN;tr|E7EQB9|E7EQB9_HUMAN;NM_203290#(-s-:6_P5589968284194);NM_004875#(-t:6_P3287661565136);NM_004875#(-s-:6_P5589968284194)	sp|O15160|RPAC1_HUMAN	yes	no	2	0.013761	54.343	15919000
AASQGYTVAR	R	10	0	1022.51	sp|Q9UBV2|SE1L1_HUMAN	sp|Q9UBV2|SE1L1_HUMAN	yes	yes	2	0.0065047	57.203	21089000
AASQILILK	K	9	0	955.607	NM_005845#(f-T:13_A4479373726799);NM_005845#(f-:13_A8337793623368);sp|O15439|MRP4_HUMAN;sp|O15439-2|MRP4_HUMAN;NM_005845#(f-T:13_A9576108333162);NM_005845#(-t:13_A7034148020643);NM_005845#(-t:13_A4087858836437);NM_005845#(f-:13_A3007118493291);sp|O15439-3|MRP4_HUMAN;tr|B7Z3Q7|B7Z3Q7_HUMAN	NM_005845#(f-T:13_A4479373726799)	yes	no	2	1.6551e-05	140.11	63648000
AASQPPNSSEAGR	R	13	0	1270.59	sp|Q9UI08-2|EVL_HUMAN;NM_016337#(-s-:14_E548597043391);NM_016337#(-s-:14_E3938986919650);NM_016337#(r:14_E1161313770324);tr|B7Z3I5|B7Z3I5_HUMAN;NM_016337#(-s-:14_E8264515561359);tr|H0YJN0|H0YJN0_HUMAN	sp|Q9UI08-2|EVL_HUMAN	no	no	2	2.3564e-16	148.96	5603900
AASQPTSLAPEK	K	12	0	1198.62	sp|Q96N66|MBOA7_HUMAN;sp|Q96N66-2|MBOA7_HUMAN;NM_024298#(-t:19_M8885683792125);NM_024298#(-s-:19_M7462236415833);NM_024298#(-s-:19_M387600688680);NM_024298#(-s-:19_M1130436201954)	sp|Q96N66|MBOA7_HUMAN	yes	no	2	2.666e-05	92.19	491700000
AASQSTQVPTITEGVAAALLLLK	K	23	0	2281.29	sp|Q92616|GCN1L_HUMAN;NM_006836#(f-T:12_G5669865150165);NM_006836#(f-:12_G9314862352880);NM_006836#(-t:12_G1135351849413);NM_006836#(r:12_G4545285494172);NM_006836#(-s-:12_G69393095546)	sp|Q92616|GCN1L_HUMAN	no	no	2,3,4	7.8252e-90	213.48	845270000
AASQTSQTVASHVPFADLCSTLER	M	24	0	2575.23	sp|P49917|DNLI4_HUMAN	sp|P49917|DNLI4_HUMAN	yes	yes	2,3	2.0811e-54	155.17	25678000
AASQVLGEKINILSGETVK	M	19	1	1956.09	sp|Q9Y5Z9-2|UBIA1_HUMAN;sp|Q9Y5Z9|UBIA1_HUMAN	sp|Q9Y5Z9-2|UBIA1_HUMAN	yes	no	3	0.00069583	74.732	528840
AASSAAQGAFQGN	R	13	0	1178.53	NM_005697#(f-:15_S7415096546802);sp|O15127|SCAM2_HUMAN;NM_005697#(-s-:15_S275851563747);NM_005697#(f-T:15_S2285813881640)	NM_005697#(f-:15_S7415096546802)	yes	no	2	1.4482e-06	96.334	28883000
AASSASGSTCGSMSQTHPVLESGLLASAGCSAPR	R	34	0	3291.49	sp|O75081-4|MTG16_HUMAN;tr|E7EU24|E7EU24_HUMAN;sp|O75081|MTG16_HUMAN;sp|O75081-5|MTG16_HUMAN;tr|H3BNI7|H3BNI7_HUMAN	sp|O75081-4|MTG16_HUMAN	yes	no	3,4	3.6374e-10	65.801	894920
AASSFFSTQAHVACEHPTGWSSMEER	K	26	0	2909.25	sp|Q96JI7|SPTCS_HUMAN;sp|Q96JI7-3|SPTCS_HUMAN;NM_025137#(-s-:15_S954045423678);NM_025137#(r:15_S5450574717297);tr|C4B7M2|C4B7M2_HUMAN;sp|Q96JI7-2|SPTCS_HUMAN;NM_025137#(-s-:15_S809848708453);tr|H0YLK7|H0YLK7_HUMAN;tr|H0YKC1|H0YKC1_HUMAN	sp|Q96JI7|SPTCS_HUMAN	yes	no	4	3.4875e-30	99.838	3479500
AASSIDQFSIR	K	11	0	1193.6	sp|Q8TBA6|GOGA5_HUMAN;NM_005113#(f-:14_G8859402035056)	sp|Q8TBA6|GOGA5_HUMAN	yes	no	2	0.0052091	64.64	3254200
AASSIQR	K	7	0	731.393	sp|Q5I7T1|AG10B_HUMAN;sp|Q5BKT4|AG10A_HUMAN;NM_032834#(f-:12_A4188503431907)	sp|Q5BKT4|AG10A_HUMAN	no	no	2	0.018103	88.029	314000
AASSLLANLWQYNK	R	14	0	1577.82	sp|Q9Y446|PKP3_HUMAN;NM_007183#(r:11_P657743881288);NM_007183#(r:11_P8691614912181);tr|H0YEY5|H0YEY5_HUMAN	sp|Q9Y446|PKP3_HUMAN	yes	no	2,3	6.9249e-17	134.99	127410000
AASSLNLSNGETESVK	R	16	0	1605.78	sp|O95819-3|M4K4_HUMAN;sp|O95819|M4K4_HUMAN;tr|G5E948|G5E948_HUMAN;sp|O95819-4|M4K4_HUMAN;sp|O95819-2|M4K4_HUMAN;sp|O95819-5|M4K4_HUMAN;tr|E7ENQ1|E7ENQ1_HUMAN;tr|G3XAA2|G3XAA2_HUMAN;tr|E7EN19|E7EN19_HUMAN;tr|E7EX83|E7EX83_HUMAN;tr|C9J840|C9J840_HUMAN;tr|H7C360|H7C360_HUMAN;tr|E7ESS2|E7ESS2_HUMAN;tr|H7C0P6|H7C0P6_HUMAN	sp|O95819-3|M4K4_HUMAN	yes	no	2	5.5022e-38	166.04	10157000
AASSSSPGSPVASSPSR	R	17	0	1530.73	sp|Q92538|GBF1_HUMAN;NM_004193#(f-T:10_G7446182588923);NM_004193#(-s-:10_G6458607998957);NM_004193#(-s-:10_G1642007098371);NM_004193#(-s-:10_G2110147888736);NM_004193#(f-:10_G5119565845322);NM_004193#(f-:10_G6558085707830);NM_004193#(-t:10_G9279335454427)	sp|Q92538|GBF1_HUMAN	yes	no	2	2.2486e-46	218.12	16198000
AASSSSSSAGGVSGSSVTGSGFSVSDLAPPR	M	31	0	2755.29	sp|Q96DE5|APC16_HUMAN;NM_173473#(r:10_C18437650581);NM_173473#(f-T:10_C4716913679885);NM_173473#(-s-:10_C9386925843651);NM_173473#(f-:10_C7964032630199)	sp|Q96DE5|APC16_HUMAN	yes	no	3	3.4272e-08	77.731	879810
AASSSSSSSSSSSSDDSEEEKAAATPK	K	27	1	2576.08	sp|Q14978-2|NOLC1_HUMAN;NM_004741#(-t-e-e-f-:10_N6929983250248);sp|Q14978|NOLC1_HUMAN;sp|Q14978-3|NOLC1_HUMAN;NM_004741#(f-:10_N1160295541390);NM_004741#(-s-:10_N1783412506962);NM_004741#(-s-:10_N8207649535093);NM_004741#(-s-s-:10_N5279417602160);NM_004741#(-t:10_N5442441548203);NM_004741#(-s-s-s-:10_N8004156318214);NM_004741#(-s-:10_N5494442256608)	sp|Q14978-2|NOLC1_HUMAN	yes	no	3	6.808e-05	70.449	512530
AASTAPSSTSTPAASSAGLIYIDPSNLR	R	28	0	2705.35	tr|J3KMW7|J3KMW7_HUMAN;sp|O95071|UBR5_HUMAN;NM_015902#(f-T:8_U4416491451152);tr|E7EMW7|E7EMW7_HUMAN	tr|J3KMW7|J3KMW7_HUMAN	yes	no	2,3	1.4562e-22	100.23	22308000
AASTASHRPIK	M	11	1	1137.63	sp|P41236|IPP2_HUMAN;tr|E7EMN6|E7EMN6_HUMAN;NM_006241#(-s-:3_P7391616978187);tr|E7EUI7|E7EUI7_HUMAN;NM_006241#(-s-s-:3_P5842074981042);NM_006241#(-s-:3_P2389441379023);sp|Q6NXS1|IPP2M_HUMAN	sp|P41236|IPP2_HUMAN	yes	no	2,3	4.5565e-06	145.41	170730000
AASTDMAGLEESFRK	M	15	1	1611.76	sp|Q9BW30|TPPP3_HUMAN;NM_016140#(-t:16_T2954686353373);NM_016140#(f-t:16_T5276540099490);NM_016140#(f-:16_T7776039413261)	sp|Q9BW30|TPPP3_HUMAN	yes	no	2	8.5577e-12	124.16	10226000
AASTIKEVAQAVLL	R	14	1	1412.82	sp|O15269|SPTC1_HUMAN;NM_006415#(-t:9_S4545636505432);NM_006415#(-s-:9_S8079634181105);NM_006415#(-s-:9_S664013619593);NM_006415#(f-:9_S9169230900028)	sp|O15269|SPTC1_HUMAN	yes	no	3	1.3855e-07	105.66	869970
AASTSMVPVAVTAAVAPVLSINSDFSDLR	M	29	0	2888.5	sp|Q9UJX2|CDC23_HUMAN;sp|Q9UJX2-2|CDC23_HUMAN;tr|D6RBY8|D6RBY8_HUMAN;tr|D6RCF8|D6RCF8_HUMAN	sp|Q9UJX2|CDC23_HUMAN	yes	no	3	1.0704e-10	80.02	5153100
AASVHTVGEDTEETPHR	K	17	0	1834.84	NM_015029#(-t:8_P5244121755241);sp|Q99575|POP1_HUMAN	NM_015029#(-t:8_P5244121755241)	yes	no	3,4	8.7904e-43	171.56	181750000
AASVPVK	K	7	0	670.401	sp|Q13428-7|TCOF_HUMAN;tr|E7ETY2|E7ETY2_HUMAN;NM_001008656#(f-:5_T269775626308);sp|Q13428-6|TCOF_HUMAN;NM_001008656#(f-T:5_T8864180160767);NM_001008656#(-s-:5_T7066496625334);tr|J3KQ96|J3KQ96_HUMAN;NM_001008656#(-s-s-:5_T3471481625793);NM_001008656#(-s-s-s-:5_T2219134301103);NM_001008656#(-s-s-s-:5_T2487000055315);NM_001008656#(-s-s-s-s-s-:5_T2025377826226);NM_001008656#(-s-s-s-s-s-:5_T1177532695…	sp|Q13428-3|TCOF_HUMAN	no	no	2	0.031576	73.975	28100000
AASVVQPQPLVVVK	R	14	0	1433.86	sp|O60885|BRD4_HUMAN;NM_058243#(f-:19_B4664773153838);NM_058243#(-s-:19_B6072360872090);NM_058243#(-t:19_B9808637576080);NM_058243#(-s-:19_B6030471918521);NM_058243#(-s-:19_B7533187044111);NM_058243#(-s-:19_B6755047483690);NM_058243#(-s-s-:19_B2833464903498);NM_058243#(f-:19_B3659266314017);NM_058243#(-t:19_B8493083910402);NM_058243#(-s-:19_B9692167884596)	sp|O60885|BRD4_HUMAN	yes	no	2	9.4584e-07	83.204	301180000
AASVVQPQPLVVVKEEK	R	17	1	1820.04	sp|O60885|BRD4_HUMAN;NM_058243#(f-:19_B4664773153838);NM_058243#(-s-:19_B6072360872090);NM_058243#(-t:19_B9808637576080);NM_058243#(-s-:19_B6030471918521);NM_058243#(-s-:19_B7533187044111);NM_058243#(-s-:19_B6755047483690);NM_058243#(-s-s-:19_B2833464903498);NM_058243#(f-:19_B3659266314017);NM_058243#(-t:19_B8493083910402);NM_058243#(-s-:19_B9692167884596)	sp|O60885|BRD4_HUMAN	yes	no	3	3.0992e-14	118.48	7228800
AASYFGMK	K	8	0	873.405	sp|O95470|SGPL1_HUMAN;NM_003901#(-s-:10_S8474543730849)	sp|O95470|SGPL1_HUMAN	yes	no	2	0.035342	51.864	84127000
AASYTEEDENHTAK	K	14	0	1564.66	sp|Q14126|DSG2_HUMAN;NM_001943#(-t:18_D5859015360135)	sp|Q14126|DSG2_HUMAN	yes	no	2,3	9.3946e-24	162.93	161700000
AATAAADFTAK	K	11	0	1036.52	sp|Q9Y3F4|STRAP_HUMAN;tr|B4DNJ6|B4DNJ6_HUMAN;NM_007178#(-s-:12_S4168626447604);NM_007178#(f-:12_S111208760542)	sp|Q9Y3F4|STRAP_HUMAN	yes	no	2	3.0759e-07	129.82	2614300000
AATAAAVVAEEDTELR	M	16	0	1615.81	sp|O95684-2|FR1OP_HUMAN;sp|O95684|FR1OP_HUMAN;NM_194429#(-s-s-:6_F4097608540834);NM_007045#(-s-s-:6_F4097608540834);NM_194429#(-s-:6_F5449108520004);NM_007045#(-s-:6_F5449108520004);NM_194429#(-s-:6_F4503782237392);NM_007045#(-s-:6_F4503782237392);NM_194429#(-s-s-:6_F6632492158561);NM_007045#(-s-s-:6_F6632492158561);NM_194429#(-s-:6_F2174087467275);NM_007045#(-s-:6_F2174087467275);NM_194429#(f-:6…	sp|O95684-2|FR1OP_HUMAN	yes	no	2	0.0011233	65.105	539910
AATAAEAVASGSGEPR	M	16	0	1443.7	sp|Q9NWT6|HIF1N_HUMAN;tr|E9PNR8|E9PNR8_HUMAN	sp|Q9NWT6|HIF1N_HUMAN	yes	no	2	4.6905e-09	98.281	25781000
AATACFGFPK	R	10	0	1068.51	sp|Q9UJA5|TRM6_HUMAN;NM_015939#(-s-:20_T6462526841825);NM_015939#(-s-s-s-:20_T4982295671118);sp|Q9UJA5-2|TRM6_HUMAN;sp|Q9UJA5-3|TRM6_HUMAN;tr|B4DUV6|B4DUV6_HUMAN;NM_015939#(-s-s-:20_T8593783873902)	sp|Q9UJA5|TRM6_HUMAN	yes	no	2	0.014793	50.353	71156000
AATAGPPNAR	R	10	0	924.478	NM_015168#(-t:19_Z3495756892937);NM_015168#(f-:19_Z3771646693685);sp|Q9UPT8|ZC3H4_HUMAN;NM_015168#(f-T:19_Z385591500759);tr|M0QY97|M0QY97_HUMAN	sp|Q9UPT8|ZC3H4_HUMAN	no	no	2	0.0456	50.353	3069500
AATALKDVVK	K	10	1	1014.61	tr|B7Z254|B7Z254_HUMAN;NM_005742#(-s-:2_P1273068940504);NM_005742#(f-:2_P4508772416846);sp|Q15084|PDIA6_HUMAN;NM_005742#(f-T:2_P7945808857944);tr|F8WA83|F8WA83_HUMAN;tr|B5MCQ5|B5MCQ5_HUMAN;sp|Q15084-2|PDIA6_HUMAN;NM_005742#(-s-:2_P577332949760);NM_005742#(f-t:2_P240802405645);NM_005742#(f-:2_P6170534285622);NM_005742#(-t:2_P5597957984222);NM_005742#(-t:2_P3561783869905);NM_005742#(f-T:2_P59223438…	tr|B7Z254|B7Z254_HUMAN	yes	no	3	0.0011754	79.311	37006000
AATALLEAGLAR	M	12	0	1155.66	sp|Q8WUK0|PTPM1_HUMAN;sp|Q8WUK0-2|PTPM1_HUMAN;sp|Q8WUK0-3|PTPM1_HUMAN;tr|E9PQM0|E9PQM0_HUMAN	sp|Q8WUK0|PTPM1_HUMAN	yes	no	2	1.7084e-05	100.93	70571000
AATAPLLEAVDNLSAFASNPEFSSIPAQISPEGR	R	34	0	3469.74	NM_006289#(-s-s-:9_T5448982096712);NM_006289#(-s-s-s-:9_T6529221633583);NM_006289#(-s-s-s-s-s-s-:9_T9877463915433);NM_006289#(-s-s-s-s-s-:9_T6437789503476);NM_006289#(-s-s-s-s-s-:9_T8209657931625);NM_006289#(-s-s-s-s-s-:9_T8034355452369);NM_006289#(-s-s-s-s-:9_T3658876082806);NM_006289#(-s-s-s-s-s-s-s-s-s-:9_T936014498235);NM_006289#(-s-s-s-s-s-s-s-s-:9_T9102193833970);NM_006289#(-s-s-s-s-s-s-s-s…	NM_006289#(-s-s-s-:9_T1596020102767)	no	no	3,4,5	1.5602e-189	226.05	1983100000
AATAQYLSPR	R	10	0	1076.56	tr|C9JQV3|C9JQV3_HUMAN;sp|Q8N1F8|S11IP_HUMAN;NM_052902#(-t:2_S3060117157314);NM_052902#(-s-s-s-s-s-:2_S8673963143650);NM_052902#(-s-:2_S7162870399967);NM_052902#(-s-s-s-s-s-s-s-s-:2_S282970075980);sp|Q8N1F8-2|S11IP_HUMAN;NM_052902#(-s-s-s-s-s-s-s-:2_S5190354826267);NM_052902#(-s-s-s-s-s-s-:2_S7736532169168);NM_052902#(-s-s-s-s-:2_S2423081801317);NM_052902#(-s-s-:2_S7873934853646);NM_052902#(-s-s-…	tr|C9JQV3|C9JQV3_HUMAN	yes	no	2	0.014376	57.39	789590
AATASAGAGGIDGK	M	14	0	1145.57	tr|I3L1P8|I3L1P8_HUMAN;sp|Q02978|M2OM_HUMAN;tr|F5GY65|F5GY65_HUMAN;NM_003562#(-s-:17_S3029195811272);NM_003562#(-s-:17_S2787605191136)	tr|I3L1P8|I3L1P8_HUMAN	yes	no	2	3.5992e-06	94.09	29366000
AATASAGAGGIDGKPR	M	16	1	1398.72	tr|I3L1P8|I3L1P8_HUMAN;sp|Q02978|M2OM_HUMAN;tr|F5GY65|F5GY65_HUMAN;NM_003562#(-s-:17_S3029195811272);NM_003562#(-s-:17_S2787605191136)	tr|I3L1P8|I3L1P8_HUMAN	yes	no	2	6.7728e-46	246.63	3829900000
AATAVAAAVAGTESAQGPPGPAASLELWLNK	M	31	0	2918.51	sp|Q9UJY4|GGA2_HUMAN;tr|H3BMM6|H3BMM6_HUMAN;tr|I3L2C4|I3L2C4_HUMAN;tr|H3BMN6|H3BMN6_HUMAN	sp|Q9UJY4|GGA2_HUMAN	yes	no	3	5.6586e-37	124.82	4670400
AATDGADTPFGR	K	12	0	1177.54	sp|Q8WUF5|IASPP_HUMAN;NM_006663#(r:19_P2012163790786);tr|K7EN03|K7EN03_HUMAN	sp|Q8WUF5|IASPP_HUMAN	yes	no	2	2.7678e-05	91.961	23701000
AATECMCNLAMSK	R	13	0	1485.61	sp|Q9H3U1-2|UN45A_HUMAN;NM_001039675#(-s-:15_U4205739839471);sp|Q9H3U1|UN45A_HUMAN;NM_018671#(-s-:15_U4205739839471);NM_018671#(f-e-e-T:15_U567043626069);NM_001039675#(-t:15_U3595802805641);NM_001039675#(-s-:15_U4117184566930);NM_001039675#(-s-:15_U2646197739850);sp|Q9H3U1-3|UN45A_HUMAN	sp|Q9H3U1-2|UN45A_HUMAN	yes	no	2	7.5995e-10	119.52	127110000
AATENIPVVR	R	10	0	1068.59	sp|Q6P1J9|CDC73_HUMAN;NM_024529#(-s-:1_C6789045663928)	sp|Q6P1J9|CDC73_HUMAN	yes	no	2	4.0335e-08	159.34	296890000
AATESVPCSPSPLAGEIR	K	18	0	1840.9	NM_178830#(f-e-e-e-e-t:19_C3292006329438);sp|Q8N9M1|CS047_HUMAN;tr|J3QS16|J3QS16_HUMAN;NM_178830#(r:19_C7276508577958);NM_178830#(r:19_C4438469167379);NM_178830#(-t:19_C9885707939260);sp|Q8N9M1-2|CS047_HUMAN;tr|J3QKZ5|J3QKZ5_HUMAN;tr|J9JIE4|J9JIE4_HUMAN	NM_178830#(f-e-e-e-e-t:19_C3292006329438)	yes	no	2	1.5814e-26	123.14	107580000
AATETNLPLLFLPVHR	K	16	0	1791	sp|Q9HCL2|GPAT1_HUMAN;tr|Q5VW52|Q5VW52_HUMAN	sp|Q9HCL2|GPAT1_HUMAN	yes	no	2,3	2.0866e-42	164.7	59228000
AATFFGCIGIDK	K	12	0	1298.63	sp|P55263|ADK_HUMAN;sp|P55263-2|ADK_HUMAN;NM_001123#(-t:10_A7630511288417);NM_001123#(f-:10_A4252719832994);NM_001123#(f-:10_A2367897179413);NM_001123#(f-T:10_A8520213177861);NM_001123#(-t:10_A5599499837003);sp|P55263-3|ADK_HUMAN;NM_001123#(f-T:10_A641688123318);NM_001123#(-t:10_A6747609834155);NM_001123#(f-:10_A5654630728385);NM_001123#(f-T:10_A2144802609810);tr|B7Z800|B7Z800_HUMAN;NM_001123#(-t…	sp|P55263|ADK_HUMAN	yes	no	2	7.9392e-05	73.881	279770000
AATFFGCIGIDKFGEILK	K	18	1	1986.03	sp|P55263|ADK_HUMAN;sp|P55263-2|ADK_HUMAN;NM_001123#(-t:10_A7630511288417);NM_001123#(f-:10_A4252719832994);NM_001123#(f-:10_A2367897179413);NM_001123#(f-T:10_A8520213177861);NM_001123#(-t:10_A5599499837003);sp|P55263-3|ADK_HUMAN;NM_001123#(f-T:10_A641688123318);NM_001123#(-t:10_A6747609834155);NM_001123#(f-:10_A5654630728385);NM_001123#(f-T:10_A2144802609810);tr|B7Z800|B7Z800_HUMAN;NM_001123#(-t…	sp|P55263|ADK_HUMAN	yes	no	3	0.030463	39.585	358720
AATFFGEVVK	M	10	0	1067.57	sp|O95456|PSMG1_HUMAN;sp|O95456-2|PSMG1_HUMAN;NM_003720#(f-:21_P9747398894682);NM_203433#(f-:21_P9747398894682);NM_003720#(-t:21_P422650865126);NM_203433#(-t:21_P422650865126);NM_203433#(f-t:21_P2884095782071);tr|F8WBH7|F8WBH7_HUMAN	sp|O95456|PSMG1_HUMAN	yes	no	2	0.00018143	100.88	369210000
AATFFGEVVKAPCR	M	14	1	1551.79	sp|O95456|PSMG1_HUMAN;sp|O95456-2|PSMG1_HUMAN;NM_003720#(f-:21_P9747398894682);NM_203433#(f-:21_P9747398894682);NM_003720#(-t:21_P422650865126);NM_203433#(-t:21_P422650865126);NM_203433#(f-t:21_P2884095782071);tr|F8WBH7|F8WBH7_HUMAN	sp|O95456|PSMG1_HUMAN	yes	no	2,3	0.00039456	79.875	1610600
AATFGLILDDVSLTHLTFGK	R	20	0	2118.14	sp|P35232|PHB_HUMAN;NM_002634#(-t:17_P8377586671799);NM_002634#(-t:17_P2211657225443);NM_002634#(f-T:17_P7087425171671);NM_002634#(f-:17_P8427936565568);tr|C9JW96|C9JW96_HUMAN;NM_002634#(-s-:17_P6954952156413);tr|E9PCW0|E9PCW0_HUMAN;tr|C9JZ20|C9JZ20_HUMAN;tr|E7ESE2|E7ESE2_HUMAN;NM_002634#(f-:17_P6163939580651);NM_002634#(-t:17_P2423120078611);NM_002634#(f-T:17_P7957760467284);NM_002634#(-s-s-:17_…	sp|P35232|PHB_HUMAN	yes	no	2,3	1.3435e-68	185.85	501300000
AATGEEVSAEDLGGADLHCR	K	20	0	2056.91	NM_022132#(f-:5_M7301896083778);sp|Q9HCC0|MCCB_HUMAN;sp|Q9HCC0-2|MCCB_HUMAN;NM_022132#(-t:5_M6105025218985);NM_022132#(f-:5_M4394038494184);tr|D6RD67|D6RD67_HUMAN;NM_022132#(-s-:5_M4253901028312);tr|D6RDF7|D6RDF7_HUMAN;tr|D6R9R1|D6R9R1_HUMAN	NM_022132#(f-:5_M7301896083778)	yes	no	3	2.8326e-75	219.23	377090000
AATGEEVSAEDLGGADLHCRK	K	21	1	2185.01	NM_022132#(f-:5_M7301896083778);sp|Q9HCC0|MCCB_HUMAN;sp|Q9HCC0-2|MCCB_HUMAN;NM_022132#(-t:5_M6105025218985);NM_022132#(f-:5_M4394038494184);tr|D6RD67|D6RD67_HUMAN;NM_022132#(-s-:5_M4253901028312);tr|D6RDF7|D6RDF7_HUMAN;tr|D6R9R1|D6R9R1_HUMAN	NM_022132#(f-:5_M7301896083778)	yes	no	4	8.7645e-69	184.78	2994200
AATGNTSEGEEAFLLIQSEK	K	20	0	2094.01	sp|A0AVF1|TTC26_HUMAN;NM_024926#(-s-s-:7_T3262406975279);sp|A0AVF1-2|TTC26_HUMAN;tr|B7Z2T3|B7Z2T3_HUMAN;tr|B7Z6R6|B7Z6R6_HUMAN;NM_024926#(f-:7_T1410297792679);sp|A0AVF1-3|TTC26_HUMAN;NM_024926#(-s-:7_T7069288237178)	sp|A0AVF1|TTC26_HUMAN	yes	no	2	0.00024249	48.597	2424100
AATHAEKELQNDMTDEK	K	17	1	1929.87	NM_014503#(-s-:12_U4916159715712);NM_014503#(-s-:12_U5824205269865);NM_014503#(-s-:12_U1873139581272);sp|O75691|UTP20_HUMAN;NM_014503#(-s-:12_U4710649009358);NM_014503#(-s-s-s-:12_U7633150193859);NM_014503#(-s-s-:12_U3714829603709);NM_014503#(-s-:12_U2545290252226);NM_014503#(-s-s-:12_U2492624747842);NM_014503#(-s-:12_U4099816756873);NM_014503#(-s-s-s-:12_U6579686780518);NM_014503#(-s-s-:12_U2707…	NM_014503#(-s-:12_U4916159715712)	no	no	4	6.8876e-31	164.41	3793800
AATHGLMLGALQGDGPLPAELEELR	R	25	0	2558.32	tr|H3BSM7|H3BSM7_HUMAN;NM_022744#(-t:16_C2298497809172);sp|Q96GQ5|CP058_HUMAN;tr|H3BR29|H3BR29_HUMAN;NM_022744#(-s-:16_C279906194913);sp|Q96GQ5-2|CP058_HUMAN	tr|H3BSM7|H3BSM7_HUMAN	yes	no	3,4	1.5408e-82	166.91	278360000
AATIIEER	R	8	0	901.487	sp|Q02952|AKA12_HUMAN;sp|Q02952-3|AKA12_HUMAN;sp|Q02952-2|AKA12_HUMAN	sp|Q02952|AKA12_HUMAN	yes	no	2	0.012387	66.504	17079000
AATILTK	K	7	0	716.443	sp|Q15003|CND2_HUMAN;NM_015341#(-t:2_N2568092057748);tr|E9PHA2|E9PHA2_HUMAN;tr|C9J470|C9J470_HUMAN;tr|B4E189|B4E189_HUMAN;NM_015341#(f-:2_N6191648250498)	sp|Q15003|CND2_HUMAN	yes	no	2	0.02783	74.929	36154000
AATIPVSQISTIAGSK	K	16	0	1542.86	NM_001003722#(-t:9_G8141585447110);sp|Q53GS7|GLE1_HUMAN;NM_001003722#(-s-:9_G6074697247181);NM_001499#(-t:9_G8141585447110);sp|Q53GS7-2|GLE1_HUMAN;NM_001499#(-s-:9_G6074697247181);tr|B3KMG0|B3KMG0_HUMAN;NM_001003722#(f-T:9_G1080517437620);NM_001499#(f-T:9_G1080517437620)	NM_001003722#(-t:9_G8141585447110)	yes	no	2	5.3636e-06	73.593	53066000
AATITATSPGALWGLDR	R	17	0	1699.89	sp|P31323|KAP3_HUMAN;NM_002736#(r:7_P2547809096757);NM_002736#(-s-:7_P3963956690659)	sp|P31323|KAP3_HUMAN	yes	no	2,3	2.7814e-42	167.69	279970000
AATITPFR	K	8	0	875.486	sp|Q13423|NNTM_HUMAN;tr|E9PCX7|E9PCX7_HUMAN;tr|H0Y8P5|H0Y8P5_HUMAN	sp|Q13423|NNTM_HUMAN	yes	no	2	0.0021409	117.4	97097000
AATIVATSEGSLWGLDR	R	17	0	1745.89	sp|P13861|KAP2_HUMAN;tr|Q9BUB1|Q9BUB1_HUMAN;NM_004157#(-s-s-:3_P1047678238529);NM_004157#(-s-:3_P9727196891810);NM_004157#(-s-:3_P1595865452945);NM_004157#(-t:3_P2041256174050);NM_004157#(-s-:3_P489864117662);NM_004157#(-s-s-:3_P2895895357420);NM_004157#(f-:3_P9492160320540);NM_004157#(-s-s-s-:3_P271735708953);tr|H7C1L0|H7C1L0_HUMAN	sp|P13861|KAP2_HUMAN	yes	no	2,3	1.0882e-42	173.03	332200000
AATIVLQSYLR	R	11	0	1233.71	NM_000259#(-s-e-S-:15_M2868924269421);tr|G3V394|G3V394_HUMAN;tr|F8W6H6|F8W6H6_HUMAN;sp|Q9Y4I1-3|MYO5A_HUMAN;sp|Q9Y4I1-2|MYO5A_HUMAN;tr|F8WE88|F8WE88_HUMAN;sp|Q9Y4I1|MYO5A_HUMAN;NM_000259#(f-:15_M8687442106876)	sp|Q9Y4I1-2|MYO5A_HUMAN	no	no	2,3	0.00010639	87.184	416390
AATLAER	K	7	0	730.397	sp|P50454|SERPH_HUMAN;tr|E9PPV6|E9PPV6_HUMAN;tr|E9PR70|E9PR70_HUMAN;tr|E9PK86|E9PK86_HUMAN;tr|E9PMI5|E9PMI5_HUMAN;NM_001235#(f-:11_S9216847087338);NM_001235#(r:11_S9406274090441);tr|E9PNX1|E9PNX1_HUMAN;tr|E9PIG2|E9PIG2_HUMAN;tr|E9PRS3|E9PRS3_HUMAN;tr|E9PJH8|E9PJH8_HUMAN;tr|E9PLA6|E9PLA6_HUMAN	sp|P50454|SERPH_HUMAN	yes	no	2	0.0080485	113.7	96520000
AATLAQELEK	R	10	0	1072.58	sp|Q14683|SMC1A_HUMAN;NM_006306#(-t:X_S2836666596922);NM_006306#(-s-:X_S7640568097907);NM_006306#(-s-s-:X_S6571678829157);NM_006306#(-s-:X_S1866781265262);NM_006306#(-s-:X_S8327927596282);NM_006306#(-s-:X_S7985604339190);NM_006306#(-s-s-:X_S3944562380803);NM_006306#(f-:X_S6506514686250);NM_006306#(f-T:X_S8218060010986);NM_006306#(r:X_S3687046763888);tr|G8JLG1|G8JLG1_HUMAN	sp|Q14683|SMC1A_HUMAN	yes	no	2	1.4599e-07	137.46	941790000
AATLDLK	M	7	0	730.423	sp|Q9Y3X0|CCDC9_HUMAN;tr|M0QYB4|M0QYB4_HUMAN;tr|M0QZR0|M0QZR0_HUMAN;tr|M0R2W0|M0R2W0_HUMAN	sp|Q9Y3X0|CCDC9_HUMAN	yes	no	1	0.093094	86.472	1630700
AATLDPGYYTYR	R	12	0	1389.66	NM_022369#(-s-s-s-s-:15_S845975773909);NM_022369#(-s-s-s-s-:15_S8231138284915);NM_022369#(-s-s-s-:15_S1864917900472);NM_022369#(-s-s-s-:15_S7678145542639);NM_022369#(-s-s-:15_S2752292752471);NM_022369#(-t:15_S4742396527769);NM_022369#(-s-s-:15_S6580054845620);NM_022369#(-s-:15_S4022257901446);sp|Q9BX79-3|STRA6_HUMAN;tr|J3KQI6|J3KQI6_HUMAN;NM_022369#(-s-:15_S1256493880262);sp|Q9BX79|STRA6_HUMAN;tr…	NM_022369#(-s-s-s-s-:15_S845975773909)	yes	no	2	0.0022445	50.222	39859000
AATLEGWK	R	8	0	874.455	sp|P57740|NU107_HUMAN;tr|B4DZ67|B4DZ67_HUMAN;NM_020401#(-s-:12_N126735791932);tr|Q6PJE1|Q6PJE1_HUMAN	sp|P57740|NU107_HUMAN	yes	no	2	0.0042754	110.03	451830000
AATLILEPAGR	M	11	0	1110.64	sp|Q86TX2|ACOT1_HUMAN;tr|G3V4F2|G3V4F2_HUMAN	sp|Q86TX2|ACOT1_HUMAN	yes	no	2,3	8.2784e-09	131.83	886320000
AATLMMLGR	R	9	0	962.504	tr|K7EIH8|K7EIH8_HUMAN;tr|K7ER44|K7ER44_HUMAN;tr|K7EJV7|K7EJV7_HUMAN;tr|K7EJL5|K7EJL5_HUMAN;tr|K7EN19|K7EN19_HUMAN;tr|K7EJE9|K7EJE9_HUMAN;tr|K7EK03|K7EK03_HUMAN;sp|Q99615|DNJC7_HUMAN;sp|Q99615-2|DNJC7_HUMAN;NM_003315#(-s-:17_D2207316486996);tr|K7ESP1|K7ESP1_HUMAN;tr|K7ELJ8|K7ELJ8_HUMAN	sp|Q99615|DNJC7_HUMAN	no	no	2	0.00019316	123.16	140470000
AATMSAVEAATCR	R	13	0	1337.61	tr|H0Y6C3|H0Y6C3_HUMAN;tr|B5MD87|B5MD87_HUMAN;NM_023078#(r:8_P6985577753390);sp|Q53H96|P5CR3_HUMAN	sp|Q53H96|P5CR3_HUMAN	no	no	2	1.2795e-15	141.13	562000000
AATMTAAGHHAEVVVDPEDER	K	21	0	2205.01	sp|Q13895|BYST_HUMAN;NM_004053#(-t:6_B4885992291651);tr|H7BY94|H7BY94_HUMAN;tr|F8WBL2|F8WBL2_HUMAN	sp|Q13895|BYST_HUMAN	yes	no	3,4	1.3538e-68	173.98	147330000
AATPQVAAELEK	R	12	0	1226.65	sp|O95900|TRUB2_HUMAN;tr|B7Z7G5|B7Z7G5_HUMAN;NM_015679#(-s-:9_T9190928261618)	sp|O95900|TRUB2_HUMAN	yes	no	2	0.00032886	66.023	36936000
AATPTLTTFPTIR	R	13	0	1388.77	sp|Q8N9Z2|CC71L_HUMAN	sp|Q8N9Z2|CC71L_HUMAN	yes	yes	2	2.5498e-06	84.365	56552000
AATQELALLISR	R	12	0	1284.74	sp|Q92817|EVPL_HUMAN;tr|K7EKI0|K7EKI0_HUMAN	sp|Q92817|EVPL_HUMAN	yes	no	2	4.0522e-05	84.365	22473000
AATQFWR	R	7	0	878.44	sp|P13667|PDIA4_HUMAN;NM_004911#(-s-:7_P776213671887);NM_004911#(-s-:7_P8513947970830);NM_004911#(-s-:7_P1096859801629);NM_004911#(-s-:7_P6378439684624);NM_004911#(-s-s-:7_P6362577866634);NM_004911#(-s-s-:7_P2173315032220);NM_004911#(-s-s-:7_P4638560001544);NM_004911#(r:7_P1234353200631);NM_004911#(-s-s-:7_P8874625432758);NM_004911#(-s-s-s-:7_P7635552424040);NM_004911#(-s-:7_P3270702805296);NM_00…	sp|P13667|PDIA4_HUMAN	no	no	2	0.0085475	108.24	998980000
AATSDLEHYDK	K	11	0	1248.56	NM_005013#(-t:11_N5417440997120);sp|P80303-2|NUCB2_HUMAN;sp|P80303|NUCB2_HUMAN;tr|J3KQU0|J3KQU0_HUMAN;NM_005013#(-s-:11_N3591173194798);tr|E9PKG6|E9PKG6_HUMAN;NM_005013#(f-T:11_N3283402847429);NM_005013#(f-:11_N6137030372881);tr|E9PLR0|E9PLR0_HUMAN;tr|E9PLE9|E9PLE9_HUMAN	NM_005013#(-t:11_N5417440997120)	yes	no	2,3	1.7257e-12	147.28	2327700000
AATSDLEHYDKTR	K	13	1	1505.71	NM_005013#(-t:11_N5417440997120);sp|P80303-2|NUCB2_HUMAN;sp|P80303|NUCB2_HUMAN;tr|J3KQU0|J3KQU0_HUMAN;NM_005013#(-s-:11_N3591173194798);tr|E9PKG6|E9PKG6_HUMAN;NM_005013#(f-T:11_N3283402847429);NM_005013#(f-:11_N6137030372881);tr|E9PLR0|E9PLR0_HUMAN;tr|E9PLE9|E9PLE9_HUMAN	NM_005013#(-t:11_N5417440997120)	yes	no	3,4	1.2488e-05	89.231	1522600
AATSEEPTGFSVDSNLLGSLSPK	R	23	0	2306.13	sp|Q96PE2|ARHGH_HUMAN;NM_014786#(r:11_A8362660404766)	sp|Q96PE2|ARHGH_HUMAN	yes	no	3	0.00024711	45.913	9445600
AATSEGVQVK	K	10	0	988.519	sp|P51608-2|MECP2_HUMAN;sp|P51608|MECP2_HUMAN;NM_004992#(-t:X_M7035567002028);NM_001110792#(r:X_M947858446505);NM_004992#(r:X_M947858446505)	sp|P51608-2|MECP2_HUMAN	yes	no	2	6.3071e-05	93.667	8244700
AATSGVPSIYAPSTYAH	K	17	0	1691.82	tr|M0QZL9|M0QZL9_HUMAN	tr|M0QZL9|M0QZL9_HUMAN	yes	yes	2	5.6157e-13	92.939	87563000
AATSGVPSIYAPSTYAHLSPAK	K	22	0	2188.12	tr|B4DKL4|B4DKL4_HUMAN;tr|A6NDW3|A6NDW3_HUMAN;sp|Q86X29-4|LSR_HUMAN;NM_205835#(r:19_L3567174239385);sp|Q86X29-3|LSR_HUMAN;sp|Q86X29|LSR_HUMAN;NM_015925#(r:19_L3567174239385);NM_205834#(r:19_L3567174239385);sp|Q86X29-2|LSR_HUMAN;NM_205835#(-s-:19_L7083047695782);NM_015925#(-s-:19_L7083047695782);NM_205834#(-s-:19_L7083047695782);NM_205835#(r:19_L6257577233135);NM_015925#(r:19_L6257577233135);NM_20…	tr|B4DKL4|B4DKL4_HUMAN	yes	no	3	9.5586e-05	50.226	14221000
AATSPALFNR	R	10	0	1046.55	sp|Q14204|DYHC1_HUMAN;NM_001376#(f-T:14_D4817313706137);NM_001376#(f-:14_D6204884647191);NM_001376#(-s-s-:14_D3701224169768);NM_001376#(-s-s-s-:14_D6630991979933);NM_001376#(-s-s-s-s-:14_D5468064353212);NM_001376#(-s-s-s-s-:14_D9818099098293);NM_001376#(-s-s-s-s-:14_D6546931526331);NM_001376#(-s-s-s-s-s-s-s-s-:14_D4365541022837);NM_001376#(-s-s-s-s-s-s-:14_D886495192293);NM_001376#(-s-s-s-s-s-s-s…	sp|Q14204|DYHC1_HUMAN	no	no	2	9.1349e-08	162.88	1368100000
AATSPAPGPSDATAR	R	15	0	1368.66	NM_015117#(-t:8_Z2733159822408);sp|Q8IXZ2|ZC3H3_HUMAN;sp|Q8IXZ2-2|ZC3H3_HUMAN	NM_015117#(-t:8_Z2733159822408)	yes	no	2	6.4091e-15	125.73	1305800
AATSTLSVCDFLGEK	R	15	0	1597.77	sp|Q8N128|F177A_HUMAN;tr|G3V583|G3V583_HUMAN;NM_001079519#(-s-:14_F6618786013699);sp|Q8N128-2|F177A_HUMAN	sp|Q8N128|F177A_HUMAN	yes	no	2	1.5668e-13	105.14	126590000
AATTEPTEVEEVVPALEPTETLLSEK	K	26	0	2782.4	sp|Q9BXK5|B2L13_HUMAN;NM_015367#(-t:22_B9606038598822);NM_015367#(-s-:22_B3596460889929);NM_015367#(f-T:22_B1878078946183);NM_015367#(-s-:22_B7208331518608);tr|B7Z238|B7Z238_HUMAN;NM_015367#(-s-s-s-:22_B4577795295622);NM_015367#(-s-s-s-:22_B121852925741);tr|B3KPE7|B3KPE7_HUMAN;NM_015367#(f-:22_B6261600851398)	sp|Q9BXK5|B2L13_HUMAN	yes	no	2,3	1.4163e-52	131.33	149550000
AATTEPTEVEEVVPALEPTETLLSEKEINAR	K	31	1	3365.71	sp|Q9BXK5|B2L13_HUMAN;NM_015367#(-t:22_B9606038598822);NM_015367#(-s-:22_B3596460889929);NM_015367#(f-T:22_B1878078946183);NM_015367#(-s-:22_B7208331518608);tr|B7Z238|B7Z238_HUMAN;NM_015367#(-s-s-s-:22_B4577795295622);NM_015367#(-s-s-s-:22_B121852925741);tr|B3KPE7|B3KPE7_HUMAN;NM_015367#(f-:22_B6261600851398)	sp|Q9BXK5|B2L13_HUMAN	yes	no	3	0.075863	24.032	262280
AATTGHVIDIYACALDQTGLLEMK	R	24	0	2590.28	sp|Q15436|SC23A_HUMAN;tr|F5H365|F5H365_HUMAN;tr|F5H6C4|F5H6C4_HUMAN;tr|B3KXI2|B3KXI2_HUMAN;tr|G3V531|G3V531_HUMAN	sp|Q15436|SC23A_HUMAN	yes	no	3,4	1.7235e-67	144.5	154970000
AATTGSGVKVPR	M	12	1	1142.64	sp|Q13404|UB2V1_HUMAN;sp|Q13404-8|UB2V1_HUMAN	sp|Q13404|UB2V1_HUMAN	yes	no	2,3	2.1264e-11	174.23	105930000
AATTVLQELK	R	10	0	1072.61	tr|E9PH62|E9PH62_HUMAN;sp|Q9NUL3-2|STAU2_HUMAN;sp|Q9NUL3|STAU2_HUMAN;sp|Q9NUL3-6|STAU2_HUMAN;sp|Q9NUL3-8|STAU2_HUMAN;tr|F8VPI7|F8VPI7_HUMAN;sp|Q9NUL3-3|STAU2_HUMAN;tr|E7EPX0|E7EPX0_HUMAN;sp|Q9NUL3-7|STAU2_HUMAN;tr|E7EVJ4|E7EVJ4_HUMAN;NM_014393#(-s-:8_S6498920793061);NM_014393#(-s-:8_S1233453382796);sp|Q9NUL3-4|STAU2_HUMAN;tr|E5RJN7|E5RJN7_HUMAN;NM_014393#(-s-s-s-:8_S386657830916);NM_014393#(-s-s-…	tr|E9PH62|E9PH62_HUMAN	yes	no	2,3	0.00029048	91.549	172800000
AATVATAAAVAPAPAPGTDSASSVHWFR	M	28	0	2679.34	sp|Q49AN0|CRY2_HUMAN;NM_021117#(r:11_C8396021258894);NM_021117#(-s-:11_C5417985971509);tr|B4DZD6|B4DZD6_HUMAN;NM_021117#(-s-s-s-:11_C1053818193575);NM_021117#(f-:11_C5226030279978)	sp|Q49AN0|CRY2_HUMAN	yes	yes	3	2.7908e-07	73.574	1449500
AATVGSLAGQPLQER	R	15	0	1496.79	sp|P02649|APOE_HUMAN;NM_000041#(f-:19_A4398314047181);tr|H0Y7L5|H0Y7L5_HUMAN;NM_000041#(r:19_A7980732519382)	sp|P02649|APOE_HUMAN	yes	no	2	5.4057e-15	124.16	51508000
AATVNLELDPIFLK	M	14	0	1542.87	NM_020395#(-t:4_I8028105922259);sp|Q96CB8|INT12_HUMAN;tr|C9JDP3|C9JDP3_HUMAN;tr|C9J0M6|C9J0M6_HUMAN;tr|E9PGI3|E9PGI3_HUMAN;tr|D6R9Y5|D6R9Y5_HUMAN;tr|D6R9W3|D6R9W3_HUMAN	NM_020395#(-t:4_I8028105922259)	yes	no	2,3	5.4233e-08	105.19	25679000
AATVVAR	R	7	0	686.408	NM_212472#(-t:17_P7673637546077);sp|P10644|KAP0_HUMAN;NM_212472#(f-:17_P9164520774049);NM_212472#(f-t:17_P61671722408);NM_212472#(f-t:17_P4919184089519);NM_212472#(f-:17_P573433742086);NM_212472#(-s-:17_P4548518000328);NM_212472#(f-:17_P9023511460858);NM_212472#(-s-:17_P3561373088858);NM_212472#(-s-s-:17_P949926116456);sp|P31321|KAP1_HUMAN;tr|H7BYW5|H7BYW5_HUMAN	NM_212472#(-t:17_P7673637546077)	no	no	2	0.021402	84.244	45618000
AATYMIICQISVK	R	13	0	1496.77	sp|Q9H583|HEAT1_HUMAN;NM_018072#(-s-:1_H5555502621026);tr|Q5T3Q7|Q5T3Q7_HUMAN	sp|Q9H583|HEAT1_HUMAN	yes	no	3	7.7672e-07	82.069	808250
AAVAAGCR	R	8	0	774.381	sp|P28838-2|AMPL_HUMAN;sp|P28838|AMPL_HUMAN;NM_015907#(-s-:4_L4463849076859)	sp|P28838-2|AMPL_HUMAN	yes	no	2	0.0004533	124.34	88556000
AAVAASGLNTMLEGNGQYTLLAPTNEAFEK	R	30	0	3080.51	NM_000358#(f-:5_T6799687276956);NM_000358#(f-:5_T1141123898011);NM_000358#(r:5_T9819048086233);NM_000358#(-t:5_T9723805776971);tr|G8JLA8|G8JLA8_HUMAN;sp|Q15582|BGH3_HUMAN;NM_000358#(-t:5_T7023585173051);NM_000358#(-s-s-s-:5_T5852148703949);NM_000358#(-s-s-:5_T8863226388456);NM_000358#(-s-:5_T5080979173559);NM_000358#(f-:5_T7914104690088);NM_000358#(f-:5_T9250872245864);NM_000358#(-s-s-s-s-:5_T276…	NM_000358#(f-:5_T6799687276956)	yes	no	3	1.1319e-21	94.207	6066300
AAVAASVGLSEGPAGSR	R	17	0	1498.77	NM_024640#(-t:1_Y6513726890240);sp|Q86U90|YRDC_HUMAN;NM_024640#(f-T:1_Y1740426797193);NM_024640#(f-:1_Y9970422418097)	NM_024640#(-t:1_Y6513726890240)	yes	no	2,3	0.0011824	52.862	11189000
AAVAATAAAK	M	10	0	843.481	sp|Q6Y1H2|HACD2_HUMAN	sp|Q6Y1H2|HACD2_HUMAN	yes	yes	2	8.7481e-08	115.06	1211600000
AAVAGLDKAER	K	11	1	1099.6	sp|P22102|PUR2_HUMAN;NM_000819#(f-T:21_G632839954053);NM_000819#(r:21_G2465940895366);tr|B4DJ93|B4DJ93_HUMAN;tr|H7C489|H7C489_HUMAN	sp|P22102|PUR2_HUMAN	yes	no	3	0.00050497	81.525	32615000
AAVATCGSVAASTGSAVATASK	M	22	0	1936.95	NM_019040#(f-:11_E1769578002238);NM_019040#(-tF-:11_E6507206725079);NM_019040#(f-:11_E75127671335);sp|Q96EB1|ELP4_HUMAN;NM_019040#(f-T:11_E8237433314226);NM_019040#(-t:11_E865391106497);NM_019040#(-t:11_E7990233421235);NM_019040#(f-T:11_E7855357348218);NM_019040#(-t:11_E964123772302);tr|B4E3W0|B4E3W0_HUMAN;tr|G5E9D4|G5E9D4_HUMAN;sp|Q96EB1-2|ELP4_HUMAN;tr|E9PPJ9|E9PPJ9_HUMAN	NM_019040#(f-:11_E1769578002238)	yes	no	3	9.8546e-05	66.467	1522800
AAVATFLQSVQVPEFTPK	R	18	0	1932.04	NM_153280#(-s-s-s-s-s-s-s-s-s-:X_U3496870553420);NM_153280#(-s-s-s-:X_U6112185564596);NM_153280#(-s-s-s-s-s-s-s-s-s-s-s-:X_U3769449095174);NM_153280#(-s-s-s-s-s-s-s-s-s-s-:X_U8405715054399)	NM_153280#(-s-s-s-:X_U6112185564596)	no	no	2,3,4	2.7856e-62	221.85	4821700000
AAVAVAVR	M	8	0	755.465	sp|Q9UI10-3|EI2BD_HUMAN;NM_015636#(-s-s-:2_E6140012358880);NM_015636#(f-:2_E1636118701179);NM_015636#(-s-s-:2_E8361753965174);NM_015636#(-s-s-s-s-:2_E337830508619);NM_015636#(-s-s-:2_E7373558734117);NM_015636#(-s-:2_E1459666642036);NM_015636#(-s-s-s-:2_E7787424601599);NM_015636#(-s-s-s-s-s-:2_E7866109838698);tr|F8WEV6|F8WEV6_HUMAN;sp|Q9UI10|EI2BD_HUMAN;NM_001034116#(-s-s-:2_E6140012358880);NM_001…	sp|Q9UI10|EI2BD_HUMAN	no	no	2	0.0017726	120.65	3616700
AAVAVVPLVSEDK	K	13	0	1296.73	NM_014827#(-s-s-:1_Z5513817142953);NM_014827#(-s-:1_Z7400875487720);NM_014827#(-s-:1_Z8903969018148);NM_014827#(-s-:1_Z356472672690);NM_014827#(f-:1_Z7280369872583);sp|O75152|ZC11A_HUMAN;NM_014827#(-s-s-s-:1_Z8432017696098);NM_014827#(-s-s-s-:1_Z2863203943258);NM_014827#(-s-s-:1_Z1952807957426);NM_014827#(-s-s-:1_Z1833912177965);NM_014827#(-s-:1_Z9094686669132);NM_014827#(-s-:1_Z318329384689);NM_…	NM_014827#(-s-s-:1_Z5513817142953)	yes	no	2	1.6311e-05	79.089	130490000
AAVAVVPLVSEDKSVTVPEAENPR	K	24	1	2476.32	NM_014827#(-s-s-:1_Z5513817142953);NM_014827#(-s-:1_Z7400875487720);NM_014827#(-s-:1_Z8903969018148);NM_014827#(-s-:1_Z356472672690);NM_014827#(f-:1_Z7280369872583);sp|O75152|ZC11A_HUMAN;NM_014827#(-s-s-s-:1_Z8432017696098);NM_014827#(-s-s-s-:1_Z2863203943258);NM_014827#(-s-s-:1_Z1952807957426);NM_014827#(-s-s-:1_Z1833912177965);NM_014827#(-s-:1_Z9094686669132);NM_014827#(-s-:1_Z318329384689);NM_…	NM_014827#(-s-s-:1_Z5513817142953)	yes	no	3,4	0.00040426	58.373	7225600
AAVAWEAGK	K	9	0	901.466	sp|P11766|ADHX_HUMAN;NM_000671#(f-t:4_A7981177037436);NM_000671#(-t:4_A4169388847134);NM_000671#(f-:4_A3726711386996);tr|H0YAG8|H0YAG8_HUMAN;tr|D6RFE4|D6RFE4_HUMAN;tr|D6R9G2|D6R9G2_HUMAN;tr|D6RAY0|D6RAY0_HUMAN	sp|P11766|ADHX_HUMAN	yes	no	2	0.0092203	72.042	17337000
AAVAWEAGKPLSIEEIEVAPPK	K	22	1	2304.24	sp|P11766|ADHX_HUMAN;NM_000671#(f-t:4_A7981177037436);NM_000671#(-t:4_A4169388847134);NM_000671#(f-:4_A3726711386996);tr|H0YAG8|H0YAG8_HUMAN;tr|D6RFE4|D6RFE4_HUMAN;tr|D6R9G2|D6R9G2_HUMAN;tr|D6RAY0|D6RAY0_HUMAN	sp|P11766|ADHX_HUMAN	yes	no	2,3,4	3.9912e-84	205.68	3337400000
AAVCGFEAFINGK	K	13	0	1382.67	sp|Q9UKK3|PARP4_HUMAN	sp|Q9UKK3|PARP4_HUMAN	yes	yes	2	0.014003	49.483	2132200
AAVDAGFVPNDMQVGQTGK	R	19	0	1903.91	sp|P13804|ETFA_HUMAN;sp|P13804-2|ETFA_HUMAN;NM_000126#(-s-:15_E7240163323802);NM_000126#(-t:15_E1089460002095);NM_000126#(f-:15_E2861193482273);NM_000126#(f-T:15_E8281822657995);NM_000126#(f-t:15_E1458677687422);NM_001127716#(-s-:15_E7240163323802);NM_001127716#(-t:15_E1089460002095);NM_001127716#(f-:15_E2861193482273);NM_001127716#(f-T:15_E8281822657995);tr|H0YLU7|H0YLU7_HUMAN;NM_001127716#(-t:1…	sp|P13804|ETFA_HUMAN	yes	no	2,3	2.9209e-30	123.63	3806300000
AAVDDYPLPSHLDLPSFAPPAQLAPTIYPSEEGVTER	R	37	0	3962.96	sp|Q2TAZ0|ATG2A_HUMAN;sp|Q2TAZ0-3|ATG2A_HUMAN;NM_015104#(r:11_A9510852831725);tr|H7C3T2|H7C3T2_HUMAN	sp|Q2TAZ0|ATG2A_HUMAN	yes	no	3	0.082935	5.966	12071000
AAVDGLSK	K	8	0	759.413	sp|Q13155|AIMP2_HUMAN;NM_006303#(f-:7_J3079644772724);NM_006303#(f-:7_J57401953933)	sp|Q13155|AIMP2_HUMAN	yes	no	2	0.035725	54.436	23292000
AAVDSFYLLYR	M	11	0	1316.68	sp|Q3SXM5|HSDL1_HUMAN;sp|Q3SXM5-2|HSDL1_HUMAN;tr|H3BQI7|H3BQI7_HUMAN;tr|H3BT52|H3BT52_HUMAN;tr|H3BNH5|H3BNH5_HUMAN	sp|Q3SXM5|HSDL1_HUMAN	yes	no	2	2.1195e-09	143.96	119990000
AAVDYQK	R	7	0	793.397	NM_005911#(r:2_M9200175101618);tr|B4DN45|B4DN45_HUMAN;NM_005911#(r:2_M6891161737244)	NM_005911#(r:2_M6891161737244)	no	no	2	0.0073935	116.11	53136000
AAVEAAAEPVTVVAAVGPK	M	19	0	1748.97	sp|Q96C34-2|RUND1_HUMAN;sp|Q96C34|RUND1_HUMAN	sp|Q96C34-2|RUND1_HUMAN	yes	no	3	0.077139	22.435	665220
AAVEALQSQALHATSQQPLR	K	20	0	2118.12	NM_015146#(-s-:5_S3103310934769);NM_001098812#(-s-:5_S3103310934769);sp|Q92599-2|SEPT8_HUMAN;NM_001098811#(-s-:5_S3103310934769);tr|A6NMH6|A6NMH6_HUMAN;tr|A6NFQ9|A6NFQ9_HUMAN;tr|F6W7K9|F6W7K9_HUMAN;NM_001098811#(-t:5_S567057211894);tr|F8W8I8|F8W8I8_HUMAN;sp|Q92599|SEPT8_HUMAN;NM_015146#(-t:5_S2945740848760);NM_015146#(f-:5_S605139816257);NM_001098812#(-t:5_S2945740848760);NM_001098812#(f-:5_S6051…	NM_015146#(-s-:5_S3103310934769)	yes	no	2,3	9.2787e-59	155.49	523520000
AAVEDNHLLIK	R	11	0	1221.67	sp|Q05823|RN5A_HUMAN;tr|Q6AI46|Q6AI46_HUMAN	sp|Q05823|RN5A_HUMAN	yes	no	3	0.00082365	53.798	10289000
AAVEDSGTTVETIK	K	14	0	1419.71	NM_019592#(f-:9_R9509592998896);sp|Q5VTR2|BRE1A_HUMAN;NM_019592#(f-T:9_R568128978609);NM_019592#(-t:9_R9165180298216);tr|C9J0A5|C9J0A5_HUMAN;tr|C9JXC9|C9JXC9_HUMAN;tr|C9JMW8|C9JMW8_HUMAN;tr|C9JWJ4|C9JWJ4_HUMAN	NM_019592#(f-:9_R9509592998896)	yes	no	2	2.8397e-12	122.97	17285000
AAVEEGIVLGGGCALLR	R	17	0	1683.9	NM_199440#(-t:2_H9655191753727);NM_199440#(-s-s-s-:2_H2723074634144);NM_199440#(-t:2_H7052663192571);NM_199440#(-s-s-s-:2_H5603286286493);NM_199440#(-t:2_H447316796176);NM_199440#(-s-s-s-s-s-:2_H8161397303114);NM_199440#(-s-s-s-s-s-s-:2_H2474195630101);NM_199440#(-s-s-s-s-s-s-s-:2_H7371562168057);NM_199440#(-s-s-s-s-s-s-s-:2_H3974286435259);NM_199440#(f-:2_H4077504892702);NM_199440#(-s-s-:2_H7789…	NM_199440#(-t:2_H9655191753727)	no	no	2,3	7.3196e-38	160.65	19054000000
AAVEELLER	R	9	0	1028.55	sp|Q15814|TBCC_HUMAN	sp|Q15814|TBCC_HUMAN	yes	yes	2	0.0013581	87.258	151630000
AAVELEEPEDAR	K	12	0	1327.63	NM_012469#(f-:20_P376393255676);sp|O94906|PRP6_HUMAN;sp|O94906-2|PRP6_HUMAN;NM_012469#(f-T:20_P332983751777);NM_012469#(-s-:20_P6072137748889);NM_012469#(-s-s-:20_P6876286865040);NM_012469#(-s-s-:20_P4354998175358);NM_012469#(-s-:20_P1496667181297);NM_012469#(-s-:20_P7609726871486);NM_012469#(-s-s-s-:20_P8844451882944);NM_012469#(-s-s-:20_P225171199762);NM_012469#(-s-:20_P6201763996652);NM_012469…	NM_012469#(f-:20_P376393255676)	yes	no	2,3	2.6645e-16	174.24	386960000
AAVENHVR	R	8	0	894.467	sp|P49247|RPIA_HUMAN;NM_144563#(f-T:2_R8727593780206);NM_144563#(f-:2_R4172869981600);NM_144563#(-t:2_R1477039044674)	sp|P49247|RPIA_HUMAN	yes	no	2	0.044744	47.349	10377000
AAVENLPTFLVELSR	R	15	0	1657.9	NM_002265#(-s-s-s-s-s-s-s-:17_K9778635567800);NM_002265#(-s-s-s-s-s-s-s-s-s-s-s-:17_K5941002804323);NM_002265#(-s-s-:17_K3325553858025);NM_002265#(-s-s-s-s-:17_K6685484148392)	NM_002265#(-s-s-s-s-:17_K6685484148392)	no	no	2,3	1.8676e-32	186.08	13021000000
AAVEQLTEEQKNEFK	K	15	1	1762.87	NM_003280#(f-:3_T9651217923305);NM_003280#(-t:3_T9382314157572);sp|P63316|TNNC1_HUMAN;NM_003280#(-s-s-:3_T3224317140963);NM_003280#(-s-:3_T8400601155520)	NM_003280#(f-:3_T9651217923305)	no	no	3	5.2009e-06	83.692	21984000
AAVESLGFILFR	R	12	0	1321.74	sp|Q99460|PSMD1_HUMAN;NM_002807#(-t:2_P8005182489568);NM_002807#(f-:2_P3712758774498);NM_002807#(-s-:2_P1899531686369);NM_002807#(-s-:2_P1414165894672);NM_002807#(-s-:2_P7979012182540);sp|Q99460-2|PSMD1_HUMAN;NM_002807#(-s-s-:2_P6561119247200);NM_002807#(-s-s-s-:2_P5420048973863);NM_002807#(-s-s-s-:2_P160676383727);NM_002807#(-s-s-s-s-:2_P7033823798657);NM_002807#(f-:2_P3624151762896);NM_002807#(…	sp|Q99460|PSMD1_HUMAN	yes	no	2,3	1.1749e-16	158.05	701430000
AAVETLGVPCFLGGMAR	R	17	0	1747.87	sp|A1L0T0|ILVBL_HUMAN;tr|M0R026|M0R026_HUMAN;NM_006844#(-s-s-:19_I6261188282581);NM_006844#(-s-s-:19_I4750643286095);NM_006844#(r:19_I3892088478665);NM_006844#(-s-s-s-s-:19_I6638263504501);NM_006844#(r:19_I8018463981041);NM_006844#(r:19_I7868017559708);tr|M0QZX5|M0QZX5_HUMAN;NM_006844#(r:19_I9887464395205);NM_006844#(-s-:19_I845322466525)	sp|A1L0T0|ILVBL_HUMAN	no	no	2,3	3.2283e-42	169.4	882000000
AAVETSFLDYGENLVQK	K	17	0	1882.93	sp|Q14674|ESPL1_HUMAN;sp|Q14674-2|ESPL1_HUMAN	sp|Q14674|ESPL1_HUMAN	yes	no	2,3	2.5545e-09	80.026	11769000
AAVEWFDGK	K	9	0	1021.49	NM_005243#(-s-:22_E9224918032881);NM_005243#(-s-s-s-:22_E1886394674762);NM_005243#(-s-s-s-:22_E3717686612354);NM_005243#(f-:22_E4966429065748);NM_005243#(f-:22_E2006061044951);NM_005243#(-s-s-:22_E411055158015);NM_005243#(-s-s-:22_E534354926551);NM_005243#(f-:22_E5060412655347);NM_005243#(-t:22_E5727707654484);NM_005243#(f-t:22_E6125893122877);sp|Q01844-6|EWS_HUMAN;NM_005243#(f-:22_E1186426154699…	NM_005243#(-tF-:22_E9745549785351)	no	no	2	0.00059344	112.11	3799400000
AAVEWFDGKDFQGSK	K	15	1	1683.79	NM_005243#(-s-:22_E9224918032881);NM_005243#(-s-s-s-:22_E1886394674762);NM_005243#(-s-s-s-:22_E3717686612354);NM_005243#(f-:22_E4966429065748);NM_005243#(f-:22_E2006061044951);NM_005243#(-s-s-:22_E411055158015);NM_005243#(-s-s-:22_E534354926551);NM_005243#(f-:22_E5060412655347);NM_005243#(-t:22_E5727707654484);NM_005243#(f-t:22_E6125893122877);sp|Q01844-6|EWS_HUMAN;NM_005243#(f-:22_E1186426154699…	NM_005243#(-tF-:22_E9745549785351)	no	no	2,3	6.1351e-26	167.37	1074400000
AAVEWFDGKDFQGSKLK	K	17	2	1924.97	NM_005243#(-s-:22_E9224918032881);NM_005243#(-s-s-s-:22_E1886394674762);NM_005243#(-s-s-s-:22_E3717686612354);NM_005243#(f-:22_E4966429065748);NM_005243#(f-:22_E2006061044951);NM_005243#(-s-s-:22_E411055158015);NM_005243#(-s-s-:22_E534354926551);NM_005243#(f-:22_E5060412655347);NM_005243#(-t:22_E5727707654484);NM_005243#(f-t:22_E6125893122877);sp|Q01844-6|EWS_HUMAN;NM_005243#(f-:22_E1186426154699…	NM_005243#(-tF-:22_E9745549785351)	no	no	4	0.0094248	61.127	736230
AAVFEEIDTYER	K	12	0	1441.67	sp|Q96F86|EDC3_HUMAN;tr|H3BSQ0|H3BSQ0_HUMAN;tr|H3BPW9|H3BPW9_HUMAN	sp|Q96F86|EDC3_HUMAN	yes	no	2	3.9932e-11	133.05	78271000
AAVFEEIDTYERR	K	13	1	1597.77	sp|Q96F86|EDC3_HUMAN;tr|H3BSQ0|H3BSQ0_HUMAN;tr|H3BPW9|H3BPW9_HUMAN	sp|Q96F86|EDC3_HUMAN	yes	no	3	4.4784e-07	92.19	12636000
AAVFLALEEQEK	R	12	0	1346.71	sp|O95684-2|FR1OP_HUMAN;sp|O95684|FR1OP_HUMAN;NM_194429#(-s-s-:6_F4097608540834);NM_007045#(-s-s-:6_F4097608540834);NM_194429#(-s-:6_F5449108520004);NM_007045#(-s-:6_F5449108520004);NM_194429#(-s-:6_F4503782237392);NM_007045#(-s-:6_F4503782237392);NM_194429#(-s-s-:6_F6632492158561);NM_007045#(-s-s-:6_F6632492158561);NM_194429#(f-:6_F1620669616037);NM_007045#(-s-s-s-s-s-:6_F509178378808);NM_007045…	sp|O95684-2|FR1OP_HUMAN	yes	no	2,3	2.3203e-14	144.7	29990000
AAVFLALEEQEKVENK	R	16	1	1816.96	sp|O95684-2|FR1OP_HUMAN;sp|O95684|FR1OP_HUMAN;NM_194429#(-s-s-:6_F4097608540834);NM_007045#(-s-s-:6_F4097608540834);NM_194429#(-s-:6_F5449108520004);NM_007045#(-s-:6_F5449108520004);NM_194429#(-s-:6_F4503782237392);NM_007045#(-s-:6_F4503782237392);NM_194429#(f-:6_F1620669616037);NM_007045#(f-:6_F1620669616037)	sp|O95684-2|FR1OP_HUMAN	yes	no	3	1.9087e-14	118.21	5677500
AAVGEEKDINTFVGTPVEK	K	19	1	2003.02	sp|P46013-2|KI67_HUMAN;sp|P46013|KI67_HUMAN	sp|P46013|KI67_HUMAN	no	no	3	3.541e-53	187.47	42527000
AAVGPPQQQVR	M	11	0	1149.63	sp|Q8WU17|RN139_HUMAN	sp|Q8WU17|RN139_HUMAN	yes	yes	2	0.0013604	70.363	18445000
AAVGQEEIQLR	K	11	0	1212.65	sp|P02549-2|SPTA1_HUMAN;sp|P02549|SPTA1_HUMAN	sp|P02549-2|SPTA1_HUMAN	yes	no	2	0.039785	40.496	2790500
AAVGQESPGGLEAGNAK	R	17	0	1554.76	sp|Q29RF7|PDS5A_HUMAN;NM_001100399#(-t:4_P3185044012916);NM_001100399#(-s-:4_P7721565709445);NM_015200#(-t:4_P3185044012916);NM_015200#(-s-:4_P7721565709445);NM_015200#(-s-:4_P2461076792441)	sp|Q29RF7|PDS5A_HUMAN	yes	no	2	3.9229e-42	178.47	128580000
AAVGRPLDK	R	9	1	925.535	sp|Q8WUM4-2|PDC6I_HUMAN;tr|C9IZF9|C9IZF9_HUMAN;tr|F8WEQ7|F8WEQ7_HUMAN;tr|F8WBR8|F8WBR8_HUMAN	sp|Q8WUM4-2|PDC6I_HUMAN	no	no	3	0.05745	46.335	7448200
AAVGRPLDKHEGALETLLR	R	19	2	2045.14	sp|Q8WUM4-2|PDC6I_HUMAN;tr|C9IZF9|C9IZF9_HUMAN;tr|F8WEQ7|F8WEQ7_HUMAN;tr|F8WBR8|F8WBR8_HUMAN	sp|Q8WUM4-2|PDC6I_HUMAN	no	no	4	3.014e-05	86.8	53001000
AAVHGLSMQQEIGFQK	R	16	0	1742.88	sp|Q07864|DPOE1_HUMAN;tr|E7ETS8|E7ETS8_HUMAN;tr|F5H1D6|F5H1D6_HUMAN;NM_006231#(r:12_P9383162409758);NM_006231#(r:12_P9661688689513);tr|F5H7H6|F5H7H6_HUMAN	sp|Q07864|DPOE1_HUMAN	yes	no	3	1.8703e-30	148.52	2193200
AAVHLEGK	K	8	0	823.455	NM_003373#(-s-:10_V7808343453743);NM_014000#(-s-:10_V7808343453743);NM_003373#(-s-s-:10_V4946397173805);NM_014000#(-s-s-:10_V4946397173805);NM_003373#(-s-s-s-:10_V7544549772803);NM_014000#(-s-s-s-:10_V7544549772803);NM_003373#(-s-s-s-s-:10_V9783051377797);NM_014000#(-s-s-s-s-:10_V9783051377797);NM_003373#(-s-s-s-s-s-:10_V2193193708518);NM_014000#(-s-s-s-s-s-:10_V2193193708518);tr|Q5JQ13|Q5JQ13_HU…	sp|P18206-2|VINC_HUMAN	no	no	2	0.0054702	104.06	7461300
AAVHTYGIASVPNQPLK	K	17	0	1764.95	sp|Q9UHI6|DDX20_HUMAN;tr|E9PJ60|E9PJ60_HUMAN	sp|Q9UHI6|DDX20_HUMAN	yes	no	3	3.1577e-14	98.943	62712000
AAVHTYGIASVPNQPLKK	K	18	1	1893.05	sp|Q9UHI6|DDX20_HUMAN;tr|E9PJ60|E9PJ60_HUMAN	sp|Q9UHI6|DDX20_HUMAN	yes	no	3,4	1.562e-19	111.64	4406200
AAVHYTVGCLCEEVALDK	K	18	0	2033.95	sp|Q8N2Z9|CENPS_HUMAN;sp|Q8N2Z9-2|CENPS_HUMAN;NM_198544#(-t:1_A6920903382370)	sp|Q8N2Z9|CENPS_HUMAN	no	no	3	5.7264e-26	109.04	14680000
AAVHYTVGCLCEEVALDKEMQFSK	K	24	1	2784.29	sp|Q8N2Z9|CENPS_HUMAN;sp|Q8N2Z9-2|CENPS_HUMAN;NM_198544#(-t:1_A6920903382370)	sp|Q8N2Z9|CENPS_HUMAN	no	no	3	8.751e-55	160.36	1326600
AAVIAVTR	R	8	0	799.492	sp|P30613-2|KPYR_HUMAN;NM_181871#(-t:1_P6392744225002);sp|P30613|KPYR_HUMAN;NM_000298#(-t:1_P6392744225002)	sp|P30613-2|KPYR_HUMAN	yes	no	2	0.034568	53.968	423470
AAVIGDVIR	R	9	0	912.539	sp|Q9NR30|DDX21_HUMAN;sp|Q9NR30-2|DDX21_HUMAN;NM_004728#(-s-:10_D2418388952926)	sp|Q9NR30|DDX21_HUMAN	yes	no	2	0.0001258	128.38	3032300000
AAVIGPDVFAK	R	11	0	1086.61	sp|P58107|EPIPL_HUMAN;tr|E9PPU0|E9PPU0_HUMAN	sp|P58107|EPIPL_HUMAN	no	no	2	0.00071643	68.355	130360000
AAVILESIFLK	M	11	0	1202.73	sp|Q06187|BTK_HUMAN;tr|Q5JY90|Q5JY90_HUMAN;NM_000061#(r:X_B9866061259403)	sp|Q06187|BTK_HUMAN	yes	no	2	3.3077e-05	108.7	24056000
AAVILESIFLKR	M	12	1	1358.83	sp|Q06187|BTK_HUMAN;tr|Q5JY90|Q5JY90_HUMAN;NM_000061#(r:X_B9866061259403)	sp|Q06187|BTK_HUMAN	yes	no	2	1.6532e-06	127.83	1389000
AAVKDVEEEKFPTQLSR	K	17	2	1946.01	sp|Q2TAY7|SMU1_HUMAN;tr|B4E3L0|B4E3L0_HUMAN	sp|Q2TAY7|SMU1_HUMAN	yes	no	3,4	4.382e-43	214.46	141240000
AAVKEPLEFHAK	M	12	1	1338.73	sp|Q03701|CEBPZ_HUMAN;NM_005760#(-s-s-:2_C8305868468084);NM_005760#(r:2_C1434265812430);NM_005760#(-s-:2_C8410203170450);NM_005760#(-s-s-s-:2_C6548139193663);NM_005760#(r:2_C9749003864167);NM_005760#(-s-s-:2_C7136344671325);NM_005760#(-s-:2_C7713787958449);NM_005760#(-t:2_C2831937972290);NM_005760#(f-T:2_C9946766683427);NM_005760#(-s-:2_C8213334992061);NM_005760#(f-:2_C3369278104753);NM_005760#(-…	sp|Q03701|CEBPZ_HUMAN	yes	no	3	2.677e-06	132.79	30580000
AAVKGYLGPEQLPDCLK	K	17	1	1857.97	sp|P40926|MDHM_HUMAN;tr|E9PDB2|E9PDB2_HUMAN	sp|P40926|MDHM_HUMAN	yes	no	3	3.1091e-09	96.773	18594000
AAVLDTGASIHLAR	K	14	0	1393.77	sp|Q9H790|EXO5_HUMAN	sp|Q9H790|EXO5_HUMAN	yes	yes	3	0.00044796	52.5	105330000
AAVLEAMTAFR	K	11	0	1178.61	tr|B7Z3I9|B7Z3I9_HUMAN;NM_000031#(-s-:9_A6981396045711);NM_000031#(f-:9_A9769984540187);sp|P13716|HEM2_HUMAN;sp|P13716-2|HEM2_HUMAN;NM_000031#(-s-:9_A9149930478444);NM_000031#(-s-:9_A3536284242167);NM_000031#(-t:9_A7525908036527);NM_000031#(-s-s-s-:9_A7235649734154);NM_000031#(-s-s-:9_A3857116342262);NM_000031#(-s-s-s-:9_A8042875102927);NM_000031#(-s-s-s-:9_A3782866525730);NM_000031#(-s-s-s-s-:9_…	tr|B7Z3I9|B7Z3I9_HUMAN	yes	no	2	6.3442e-05	99.283	34163000
AAVLESLLR	M	9	0	970.581	sp|Q8IWY9-1|CDAN1_HUMAN;sp|Q8IWY9|CDAN1_HUMAN	sp|Q8IWY9-1|CDAN1_HUMAN	yes	no	2	1.0851e-06	189.82	96516000
AAVLFATDIAAR	R	12	0	1217.68	tr|E9PIF2|E9PIF2_HUMAN;NM_004398#(-t:11_D3004958429624);sp|Q13206|DDX10_HUMAN	tr|E9PIF2|E9PIF2_HUMAN	yes	no	2,3	5.5576e-05	81.92	8309400
AAVLGENGR	R	9	0	885.467	sp|Q9UKM9-2|RALY_HUMAN;sp|Q9UKM9|RALY_HUMAN;NM_007367#(-s-:20_R8767804043790);NM_016732#(-s-:20_R8767804043790);NM_007367#(-s-s-:20_R8023370628470);NM_007367#(-s-:20_R9730137122065);NM_016732#(-s-s-:20_R8023370628470);NM_016732#(-s-:20_R9730137122065);tr|Q5QPL9|Q5QPL9_HUMAN;NM_007367#(-s-:20_R877016781800);NM_016732#(-s-:20_R877016781800);NM_016732#(-s-s-s-:20_R389665428999);NM_007367#(-s-s-:20_R…	sp|Q9UKM9-2|RALY_HUMAN	yes	no	2	0.001585	85.862	156250000
AAVLKPVLLGLR	M	12	1	1248.83	sp|Q9BRP1|PDD2L_HUMAN;tr|K7EQD9|K7EQD9_HUMAN	sp|Q9BRP1|PDD2L_HUMAN	yes	no	2	4.2094e-06	128.81	244050000
AAVLLEQER	R	9	0	1027.57	NM_006842#(f-:11_S1862761049899);NM_006842#(-t-f-t:11_S2111132942491);NM_006842#(f-T:11_S6628778886519);NM_006842#(-t:11_S2414268956784);NM_006842#(-t:11_S7362833792794)	NM_006842#(-t:11_S7362833792794)	no	no	2,3	4.4836e-05	146.69	1832000000
AAVLLEQERQQEIAK	R	15	1	1724.94	NM_006842#(f-:11_S1862761049899);NM_006842#(-t-f-t:11_S2111132942491);NM_006842#(f-T:11_S6628778886519);NM_006842#(-t:11_S2414268956784);NM_006842#(-t:11_S7362833792794)	NM_006842#(-t:11_S7362833792794)	no	no	3	9.9583e-12	117.2	9083400
AAVLQELATHLHPAEPEEGDSNVAR	R	25	0	2653.31	sp|Q96KN1|FA84B_HUMAN	sp|Q96KN1|FA84B_HUMAN	yes	yes	3,4	4.3848e-53	138.25	97599000
AAVLQQVLER	M	10	0	1125.65	NM_003292#(f-T:1_T8309476700424);NM_003292#(-s-:1_T1027303053845);NM_003292#(-t:1_T2688717973590);sp|P12270|TPR_HUMAN;NM_003292#(f-:1_T4038801050246);NM_003292#(-s-:1_T5885405663705);NM_003292#(-s-:1_T2910886420506);tr|Q5SWX9|Q5SWX9_HUMAN	NM_003292#(f-T:1_T8309476700424)	yes	no	2	1.8447e-08	174.41	1464500000
AAVLSDSEDEEK	K	12	0	1291.58	sp|Q96ST2|IWS1_HUMAN;NM_017969#(-s-:2_I1325462627129);NM_017969#(f-:2_I3004767731496);sp|Q96ST2-3|IWS1_HUMAN;sp|Q96ST2-2|IWS1_HUMAN;tr|B4DJ84|B4DJ84_HUMAN	sp|Q96ST2|IWS1_HUMAN	yes	no	2	1.6891e-08	124.12	85934000
AAVLSDSEDEEKASAK	K	16	1	1648.78	sp|Q96ST2|IWS1_HUMAN;NM_017969#(-s-:2_I1325462627129);NM_017969#(f-:2_I3004767731496);sp|Q96ST2-3|IWS1_HUMAN;sp|Q96ST2-2|IWS1_HUMAN;tr|B4DJ84|B4DJ84_HUMAN	sp|Q96ST2|IWS1_HUMAN	yes	no	3	6.5724e-14	114.27	12220000
AAVLYVMDLSEQCGHGLR	R	18	0	2017.97	NM_012341#(f-:10_G2170751190769);sp|Q9BZE4|NOG1_HUMAN;NM_012341#(f-T:10_G6154340353342);NM_012341#(-t:10_G8000591982371);tr|B7Z7A3|B7Z7A3_HUMAN;NM_012341#(-s-:10_G5548006338141);tr|B4DY13|B4DY13_HUMAN;NM_012341#(r:10_G3917491809450);NM_012341#(-s-:10_G6314713228434);NM_012341#(-s-s-:10_G7690049722186)	NM_012341#(f-:10_G2170751190769)	yes	no	2,3	5.5601e-61	214.45	635200000
AAVMATLLFPGR	K	12	0	1245.69	sp|Q96GX9|MTNB_HUMAN;tr|J3KN82|J3KN82_HUMAN;NM_015957#(f-t:11_A8878000535015);sp|Q96GX9-3|MTNB_HUMAN;NM_015957#(-s-:11_A2090359886674);NM_015957#(-t:11_A3401156551380)	sp|Q96GX9|MTNB_HUMAN	yes	no	2	4.3577e-05	84.479	13960000
AAVMHDILDMMPEGIK	R	16	0	1769.85	sp|Q6P2Q9|PRP8_HUMAN;NM_006445#(-s-s-:17_P279194689755);NM_006445#(-s-:17_P8796281710094);NM_006445#(-s-s-s-s-:17_P1475424602741);NM_006445#(-s-s-s-s-s-:17_P6164492300550);NM_006445#(-s-:17_P4292105955939);NM_006445#(r:17_P9746964795813);NM_006445#(-s-s-s-:17_P5733076785795);NM_006445#(-t:17_P7735428516666);NM_006445#(-s-s-:17_P5149312762924);NM_006445#(-s-s-s-s-:17_P5400656796337);NM_006445#(r:1…	sp|Q6P2Q9|PRP8_HUMAN	yes	no	2,3,4	1.1937e-30	149	2329100000
AAVMHDILDMMPEGIKQNK	R	19	1	2140.05	sp|Q6P2Q9|PRP8_HUMAN;NM_006445#(-s-s-:17_P279194689755);NM_006445#(-s-:17_P8796281710094);NM_006445#(-s-s-s-s-:17_P1475424602741);NM_006445#(-s-s-s-s-s-:17_P6164492300550);NM_006445#(-s-:17_P4292105955939);NM_006445#(r:17_P9746964795813);NM_006445#(-s-s-s-:17_P5733076785795);NM_006445#(-t:17_P7735428516666);NM_006445#(-s-s-:17_P5149312762924);NM_006445#(-s-s-s-s-:17_P5400656796337);NM_006445#(r:1…	sp|Q6P2Q9|PRP8_HUMAN	yes	no	4	0.0009331	55.094	3962700
AAVMVHQLSK	K	10	0	1082.59	sp|P35222|CTNB1_HUMAN;tr|B4DGU4|B4DGU4_HUMAN;NM_001098210#(-t:3_C9129490362789);NM_001098210#(-t:3_C2350901741797);NM_001098210#(f-T:3_C7564271859838);NM_001098210#(f-:3_C2437570538479);NM_001098210#(f-T:3_C7883709776443)	sp|P35222|CTNB1_HUMAN	yes	no	2,3	1.9432e-06	127.37	707470000
AAVMVYDDANKK	R	12	1	1323.65	NM_018212#(-s-:1_E1332393063424);NM_001008493#(-s-:1_E1332393063424);sp|Q8N8S7-2|ENAH_HUMAN;sp|Q8N8S7|ENAH_HUMAN;NM_018212#(-s-:1_E2675296247147);NM_001008493#(-s-:1_E2675296247147);NM_018212#(-s-:1_E3924196549609);NM_001008493#(-s-s-s-:1_E3925102704813);NM_001008493#(-s-:1_E3924196549609);NM_001008493#(-s-s-:1_E9142651233509)	NM_018212#(-s-:1_E1332393063424)	yes	no	3	2.348e-06	111.52	116120000
AAVNVVDFDDK	R	11	0	1191.58	NM_033637#(-s-s-:10_B5592412406831);tr|Q68DS0|Q68DS0_HUMAN;sp|Q9Y297-2|FBW1A_HUMAN;NM_033637#(-t:10_B570707598442);NM_003939#(-s-:10_B7209912302818);sp|Q9Y297|FBW1A_HUMAN;NM_003939#(-s-s-:10_B2494975269392);NM_033637#(r:10_B587601191930);NM_033645#(-s-:5_F7305446708937);NM_033644#(-t:5_F4330472825098);sp|Q9UKB1-2|FBW1B_HUMAN;tr|B4DH70|B4DH70_HUMAN;NM_033645#(-s-s-:5_F6060860266328);NM_033644#(-s-…	NM_033645#(-s-:5_F7305446708937)	no	no	2	0.00032566	73.435	483610000
AAVNVVDFDDKYIVSASGDR	R	20	1	2140.04	NM_033637#(-s-s-:10_B5592412406831);tr|Q68DS0|Q68DS0_HUMAN;sp|Q9Y297-2|FBW1A_HUMAN;NM_033637#(-t:10_B570707598442);NM_003939#(-s-:10_B7209912302818);sp|Q9Y297|FBW1A_HUMAN;NM_003939#(-s-s-:10_B2494975269392);NM_033637#(r:10_B587601191930);NM_033645#(-s-:5_F7305446708937);NM_033644#(-t:5_F4330472825098);sp|Q9UKB1-2|FBW1B_HUMAN;tr|B4DH70|B4DH70_HUMAN;NM_033645#(-s-s-:5_F6060860266328);NM_033644#(-s-…	NM_033645#(-s-:5_F7305446708937)	no	no	3	1.1915e-17	119.38	8459300
AAVPDAVGK	R	9	0	826.455	NM_000702#(-s-s-:1_A4503348412741);NM_000702#(-s-:1_A5914457605027);tr|B1AKY9|B1AKY9_HUMAN;sp|P50993|AT1A2_HUMAN;NM_000702#(-s-:1_A7806709767293);NM_000702#(-s-:1_A9371772010068);NM_000702#(-s-s-:1_A6767179126038);NM_000702#(-s-s-s-:1_A4371441804612);NM_000702#(-s-s-:1_A3820945171883);NM_000702#(-s-:1_A2840391088803);NM_000702#(-s-:1_A5334240293971);tr|H0Y7C1|H0Y7C1_HUMAN;NM_000702#(-s-s-:1_A2041…	NM_000701#(-s-:1_A8071340189724)	no	no	2	0.0035183	76.064	795850000
AAVPDTVVEPALK	K	13	0	1308.73	sp|P09327|VILI_HUMAN;NM_007127#(r:2_V763061930859);NM_007127#(-s-:2_V7280516674302);NM_007127#(-s-s-:2_V2050855218037);NM_007127#(-s-:2_V8647751749058);NM_007127#(-s-:2_V3817739920751);NM_007127#(-s-:2_V8842966881003);NM_007127#(-s-:2_V5855984630095);NM_007127#(-s-s-:2_V4767313272570);NM_007127#(-s-s-:2_V1768181098176);NM_007127#(-s-s-s-:2_V2108901508154);NM_007127#(-s-s-:2_V5117407547038);NM_007…	sp|P09327|VILI_HUMAN	no	no	2	0.00012598	69.229	203650000
AAVPELLQQQEEDR	M	14	0	1624.81	NM_152227#(-s-:20_S3051455884375);sp|Q9Y5X3|SNX5_HUMAN;NM_152227#(f-T:20_S6714097356168);NM_152227#(-s-:20_S3598705398624);NM_152227#(-t:20_S9680419084213);NM_152227#(-s-:20_S5911095771310);NM_152227#(-s-:20_S1894919137748);NM_152227#(-s-s-s-:20_S9092361235236);NM_152227#(-s-s-s-s-:20_S5855192998967);NM_152227#(-s-:20_S8730846852627);NM_152227#(-s-s-s-s-:20_S6196863578393);NM_152227#(-s-s-:20_S35…	NM_152227#(-s-:20_S3051455884375)	yes	no	2,3	7.8725e-23	159.5	285230000
AAVPELLQQQEEDRSK	M	16	1	1839.93	NM_152227#(-s-:20_S3051455884375);sp|Q9Y5X3|SNX5_HUMAN;NM_152227#(f-T:20_S6714097356168);NM_152227#(-s-:20_S3598705398624);NM_152227#(-t:20_S9680419084213);NM_152227#(-s-:20_S5911095771310);NM_152227#(-s-:20_S1894919137748);NM_152227#(-s-s-s-:20_S9092361235236);NM_152227#(-s-s-s-s-:20_S5855192998967);NM_152227#(-s-:20_S8730846852627);NM_152227#(-s-s-s-s-:20_S6196863578393);NM_152227#(-s-s-:20_S35…	NM_152227#(-s-:20_S3051455884375)	yes	no	2,3	2.6882e-24	163.99	42487000
AAVPGQPLALTAR	R	13	0	1263.73	NM_001126131#(-s-:15_P9004418598460);NM_001126131#(-t:15_P2355665411195);sp|P54098|DPOG1_HUMAN;NM_001126131#(f-:15_P1567724173414);NM_001126131#(-s-s-:15_P5368086898555);NM_001126131#(-s-:15_P8638540471958);NM_001126131#(-t:15_P8482767854139);NM_001126131#(r:15_P5766658030661);NM_001126131#(r:15_P5334842339343);NM_001126131#(r:15_P8893154747752)	NM_001126131#(-s-:15_P9004418598460)	yes	no	2	0.0027713	56.139	0
AAVPGYPQPSGTPVKPTALTGTLQVR	R	26	1	2605.42	NM_013355#(-s-s-:9_P6157982436462);NM_013355#(-s-s-:9_P2590520683476);NM_013355#(-s-:9_P1592304578598);NM_013355#(-s-:9_P3343892838202);sp|Q6P5Z2|PKN3_HUMAN;NM_013355#(-s-s-s-s-s-s-:9_P5097306693842);NM_013355#(-s-s-s-s-s-:9_P1744584543366);NM_013355#(-s-s-s-s-:9_P9118554642081);NM_013355#(-s-s-s-:9_P3641429020274);NM_013355#(-s-s-s-s-:9_P4017016968715);NM_013355#(-s-s-:9_P883607192011);NM_013355…	NM_013355#(-s-s-:9_P6157982436462)	no	no	3	0.033031	45.579	594760
AAVPLGGFLCNVADK	K	15	0	1530.79	sp|Q7L8L6|FAKD5_HUMAN	sp|Q7L8L6|FAKD5_HUMAN	yes	yes	2,3	7.2358e-09	88.561	179300000
AAVPQNNLQEQLER	M	14	0	1608.82	sp|P54132|BLM_HUMAN;tr|H0YNU5|H0YNU5_HUMAN;tr|H0YLV8|H0YLV8_HUMAN	sp|P54132|BLM_HUMAN	yes	no	2	2.6897e-06	85.45	15007000
AAVPSGASTGIYEALELR	R	18	0	1803.94	NM_001428#(-t:1_E717763861221);NM_001428#(-t:1_E6919200665369);sp|P06733|ENOA_HUMAN;NM_001428#(f-T:1_E7704936071276);NM_001428#(f-:1_E8335737285508);NM_001428#(f-:1_E6568915973209);NM_001428#(f-:1_E3320486964588);NM_001428#(f-T:1_E6706463014740);NM_001428#(f-T:1_E867762738148);NM_001428#(f-:1_E9271096457716);NM_001428#(f-:1_E5807253612777);NM_001428#(-t:1_E3358125695906);NM_001428#(-t:1_E62290665…	NM_001428#(-t:1_E717763861221)	no	no	2,3,4	1.2785e-42	155.1	45405000000
AAVPSGASTGIYEALELRDNDK	R	22	1	2276.13	NM_001428#(-t:1_E717763861221);NM_001428#(-t:1_E6919200665369);sp|P06733|ENOA_HUMAN;NM_001428#(f-T:1_E7704936071276);NM_001428#(f-:1_E8335737285508);NM_001428#(f-:1_E6568915973209);NM_001428#(f-:1_E3320486964588);NM_001428#(f-T:1_E6706463014740);NM_001428#(f-T:1_E867762738148);NM_001428#(f-:1_E9271096457716);NM_001428#(f-:1_E5807253612777);NM_001428#(-t:1_E3358125695906);NM_001428#(-t:1_E62290665…	NM_001428#(-t:1_E717763861221)	yes	no	3,4	4.1084e-11	105.51	278100000
AAVPSGASTGIYEALELRDNDKTR	R	24	2	2533.28	NM_001428#(-t:1_E717763861221);NM_001428#(-t:1_E6919200665369);sp|P06733|ENOA_HUMAN;NM_001428#(f-T:1_E7704936071276);NM_001428#(f-:1_E8335737285508);NM_001428#(f-:1_E6568915973209);NM_001428#(f-:1_E3320486964588);NM_001428#(f-T:1_E6706463014740);NM_001428#(f-T:1_E867762738148);NM_001428#(f-:1_E9271096457716);NM_001428#(f-:1_E5807253612777);NM_001428#(-t:1_E3358125695906);NM_001428#(-t:1_E62290665…	NM_001428#(-t:1_E717763861221)	yes	no	4	2.067e-05	89.297	37619000
AAVPYPPTVADLQR	R	14	0	1496.8	sp|Q71F56|MD13L_HUMAN	sp|Q71F56|MD13L_HUMAN	yes	yes	2	2.1654e-06	79.875	23837000
AAVQAAEVK	M	9	0	885.492	sp|Q15046|SYK_HUMAN;NM_001130089#(-s-t:16_K4239927907636);NM_005548#(-s-:16_K1052230914497);NM_005548#(-s-:16_K5962307107909);NM_005548#(f-:16_K8742298230871);NM_005548#(-s-s-:16_K7896758668401);NM_005548#(-s-:16_K3497631256948);NM_005548#(-t:16_K690300984392);NM_005548#(-s-s-:16_K9234458829094);NM_005548#(-s-s-s-:16_K2699241362503);NM_005548#(-s-s-s-:16_K7834816280139);NM_005548#(-s-:16_K8844591…	sp|Q15046|SYK_HUMAN	no	no	2	0.0033504	77.662	236120000
AAVQAAEVKVDGSEPK	M	16	1	1597.83	sp|Q15046|SYK_HUMAN;NM_001130089#(-s-t:16_K4239927907636);NM_005548#(-s-:16_K1052230914497);NM_005548#(-s-:16_K5962307107909);NM_005548#(f-:16_K8742298230871);NM_005548#(-s-s-:16_K7896758668401);NM_005548#(-s-:16_K3497631256948);NM_005548#(-t:16_K690300984392);NM_005548#(-s-s-:16_K9234458829094);NM_005548#(-s-s-s-:16_K2699241362503);NM_005548#(-s-s-s-:16_K7834816280139);NM_005548#(-s-:16_K8844591…	sp|Q15046|SYK_HUMAN	no	no	2	2.0408e-18	151.1	25887000
AAVQAFK	K	7	0	733.412	sp|Q8NEF9|SRFB1_HUMAN	sp|Q8NEF9|SRFB1_HUMAN	yes	yes	2	0.023983	71.258	1952200000
AAVQELSSSILAGEDPEER	R	19	0	1999.97	tr|E7ES96|E7ES96_HUMAN;NM_007318#(-s-:14_P3098579657602);sp|P49768-2|PSN1_HUMAN;sp|P49768|PSN1_HUMAN;sp|P49768-7|PSN1_HUMAN;NM_007318#(-t:14_P2068476873086);NM_007318#(f-:14_P3727808565995)	tr|E7ES96|E7ES96_HUMAN	yes	no	2,3	4.2701e-52	159.26	50267000
AAVQFLNNAWGIQK	R	14	0	1558.83	sp|Q9UMY1|NOL7_HUMAN	sp|Q9UMY1|NOL7_HUMAN	yes	yes	2,3	4.323e-17	138.45	360380000
AAVQMDPELAK	M	11	0	1171.59	sp|Q9Y312|AAR2_HUMAN;tr|A2A2Q9|A2A2Q9_HUMAN	sp|Q9Y312|AAR2_HUMAN	yes	no	2	0.0017272	67.08	21583000
AAVQVLDDIEK	K	11	0	1199.64	sp|P22033|MUTA_HUMAN;NM_000255#(r:6_M7040751401171)	sp|P22033|MUTA_HUMAN	yes	no	2	4.5083e-09	134.13	232770000
AAVQVVGSWPSVQPR	M	15	0	1579.85	sp|Q6AI08|HEAT6_HUMAN;tr|K7EIX2|K7EIX2_HUMAN;tr|K7ELR8|K7ELR8_HUMAN;tr|K7ESP5|K7ESP5_HUMAN;tr|K7EKW7|K7EKW7_HUMAN;tr|K7EK31|K7EK31_HUMAN	sp|Q6AI08|HEAT6_HUMAN	yes	no	2	0.0020246	74.789	356330
AAVSAFPTDSLER	R	13	0	1362.68	sp|O14654|IRS4_HUMAN	sp|O14654|IRS4_HUMAN	yes	yes	2	6.0518e-09	119.39	268760000
AAVSALLEQHGLQGDVAFGHSK	K	22	0	2234.14	sp|B0I1T2|MYO1G_HUMAN;NM_033054#(-s-s-:7_M2516987296422);NM_033054#(f-:7_M5804362217533);NM_033054#(-t:7_M8038535388467);NM_033054#(-s-:7_M1207653581821);NM_033054#(-s-:7_M8184966638678)	sp|B0I1T2|MYO1G_HUMAN	yes	no	3,4	2.9148e-89	213.72	196010000
AAVSHWQQQSYLDSGIHSGATTTAPSLSGK	K	30	0	3084.49	sp|P35222|CTNB1_HUMAN;tr|B4DGU4|B4DGU4_HUMAN;NM_001098210#(-t:3_C9129490362789);NM_001098210#(-t:3_C2350901741797);NM_001098210#(f-T:3_C7564271859838);NM_001098210#(f-:3_C2437570538479);NM_001098210#(f-T:3_C7883709776443);tr|E7EMJ5|E7EMJ5_HUMAN;tr|E9PDF9|E9PDF9_HUMAN;tr|E7EV28|E7EV28_HUMAN;tr|C9IZ65|C9IZ65_HUMAN	sp|P35222|CTNB1_HUMAN	yes	no	4	2.3527e-77	150.11	246980000
AAVSQQGEQLQTER	R	14	0	1543.76	sp|Q9BQS8|FYCO1_HUMAN;tr|B7ZKT7|B7ZKT7_HUMAN;sp|Q9BQS8-3|FYCO1_HUMAN;sp|Q9BQS8-2|FYCO1_HUMAN	sp|Q9BQS8|FYCO1_HUMAN	yes	no	2	3.6128e-07	85.909	3782600
AAVSVYAPPVGGFSFDNCR	M	19	0	2012.94	sp|Q99436|PSB7_HUMAN;NM_002799#(f-t:9_P262208958231);NM_002799#(-t:9_P8183174376164);NM_002799#(-t:9_P1041632758314);NM_002799#(f-:9_P8438726121217);NM_002799#(f-T:9_P4499009314256);NM_002799#(f-:9_P2711534412065);NM_002799#(f-:9_P9137714409);tr|B4E0P1|B4E0P1_HUMAN;NM_002799#(-t:9_P2110351952692);NM_002799#(f-:9_P9051779103105);tr|Q5TBG5|Q5TBG5_HUMAN	sp|Q99436|PSB7_HUMAN	yes	no	3	0.00033426	54.964	1236000
AAVSWLTPAPSK	K	12	0	1226.67	sp|Q9H9L3|I20L2_HUMAN	sp|Q9H9L3|I20L2_HUMAN	yes	yes	2	6.0719e-05	80.318	45392000
AAVTPGK	K	7	0	642.37	NM_005381#(-t:2_N1496125642353);NM_005381#(f-t:2_N5078851064966);NM_005381#(f-:2_N8833909843270);NM_005381#(-t:2_N8622516379151);NM_005381#(r:2_N380020911730);NM_005381#(-t:2_N8976627060765);NM_005381#(-t:2_N2019929968559);NM_005381#(-t:2_N1556431297860);NM_005381#(-t:2_N2693641040970);sp|P19338|NUCL_HUMAN;NM_005381#(-t:2_N268567601631);NM_005381#(f-:2_N4395329291144);NM_005381#(f-:2_N66941539533…	NM_005381#(-t:2_N1496125642353)	no	no	2	0.075712	58.604	100140000
AAVTPGKK	K	8	1	770.465	NM_005381#(-t:2_N1496125642353);NM_005381#(f-t:2_N5078851064966);NM_005381#(f-:2_N8833909843270);NM_005381#(-t:2_N8622516379151);NM_005381#(r:2_N380020911730);NM_005381#(-t:2_N8976627060765);NM_005381#(-t:2_N2019929968559);NM_005381#(-t:2_N1556431297860);NM_005381#(-t:2_N2693641040970);sp|P19338|NUCL_HUMAN;NM_005381#(-t:2_N268567601631);NM_005381#(f-:2_N4395329291144);NM_005381#(f-:2_N66941539533…	NM_005381#(-t:2_N1496125642353)	no	no	2	0.0043338	94.114	24629000
AAVVENVVK	M	9	0	927.539	sp|Q92785|REQU_HUMAN;tr|J3KMZ8|J3KMZ8_HUMAN;NM_006268#(r:11_D2355175269147);tr|B4DT58|B4DT58_HUMAN;tr|E9PN04|E9PN04_HUMAN	sp|Q92785|REQU_HUMAN	yes	no	1,2	0.0017873	83.948	271610000
AAVVEVEVGGGAAGER	M	16	0	1469.75	NM_018320#(f-:11_R1787646423222);sp|Q9H920|RN121_HUMAN;tr|E9PLR7|E9PLR7_HUMAN;tr|F8WDV7|F8WDV7_HUMAN	NM_018320#(f-:11_R1787646423222)	yes	no	2	0.032569	48.216	301600
AAVVHHFESFPAGSTLIFYK	K	20	0	2220.14	sp|Q8NFQ8|TOIP2_HUMAN	sp|Q8NFQ8|TOIP2_HUMAN	yes	yes	3,4	1.8202e-25	113.88	264300000
AAVVLPPTAALSSLFPASQR	M	20	0	1995.12	sp|Q8N988-2|ZN557_HUMAN	sp|Q8N988-2|ZN557_HUMAN	yes	yes	3	5.8048e-05	62.739	1727300
AAVVPLGTWR	R	10	0	1068.61	NM_006579#(-s-s-:X_E5654827064176);sp|Q15125|EBP_HUMAN;tr|C9J719|C9J719_HUMAN;tr|C9JJ78|C9JJ78_HUMAN;NM_006579#(-s-:X_E2397707505571)	NM_006579#(-s-s-:X_E5654827064176)	yes	no	2	1.3185e-07	147.75	1635600000
AAVVTSPPPTTAPHK	R	15	0	1472.8	sp|P35611-2|ADDA_HUMAN;tr|E7EV99|E7EV99_HUMAN;NM_001119#(-t:4_A2695816331455);NM_014190#(-t:4_A9268663474212);NM_001119#(-t:4_A9268663474212);tr|A2A3N8|A2A3N8_HUMAN;tr|E7ENY0|E7ENY0_HUMAN;NM_001119#(r:4_A4954330092706);NM_014189#(-t:4_A2695816331455);NM_176801#(-t:4_A9268663474212);NM_014189#(-t:4_A9268663474212);NM_014189#(r:4_A4954330092706);sp|P35611|ADDA_HUMAN;sp|P35611-3|ADDA_HUMAN;tr|Q86XM2…	sp|P35611-2|ADDA_HUMAN	yes	no	3	2.198e-10	94.717	45817000
AAVVVSK	K	7	0	672.417	sp|Q14978-2|NOLC1_HUMAN;NM_004741#(-t-e-e-f-:10_N6929983250248);sp|Q14978|NOLC1_HUMAN;sp|Q14978-3|NOLC1_HUMAN;NM_004741#(f-:10_N1160295541390);NM_004741#(-s-:10_N1783412506962);NM_004741#(-s-s-:10_N9906250713433);NM_004741#(-s-:10_N8207649535093);NM_004741#(-s-s-s-:10_N1168070287722);NM_004741#(-s-s-:10_N5279417602160);NM_004741#(-s-s-s-s-:10_N9009280425216);NM_004741#(-s-:10_N27708844615);NM_004…	sp|Q14978-2|NOLC1_HUMAN	yes	no	2	0.011541	104.45	188160000
AAVWDTCSGSSTPTR	R	15	0	1594.7	NM_004481#(-s-s-s-:1_G6568049815005)	NM_004481#(-s-s-s-:1_G6568049815005)	yes	yes	3	0.052475	23.456	11065000
AAVWEITGAEFSK	K	13	0	1407.7	NM_013975#(-t:17_L7779663312058);sp|P49916|DNLI3_HUMAN;NM_002311#(-t:17_L7779663312058);sp|P49916-2|DNLI3_HUMAN;NM_013975#(-s-:17_L9283225655470);NM_002311#(-s-:17_L9283225655470)	NM_013975#(-t:17_L7779663312058)	yes	no	2,3	2.9125e-11	122.46	201580000
AAVWEVDFPDVAR	R	13	0	1473.73	sp|O60294|LCMT2_HUMAN	sp|O60294|LCMT2_HUMAN	yes	yes	2	4.1476e-05	69.03	27928000
AAVWQQVLAVDAR	M	13	0	1425.77	sp|Q9H1Z4|WDR13_HUMAN;NM_017883#(-s-:X_W9093488660468);NM_017883#(-s-:X_W9698233837278);NM_017883#(-s-s-:X_W5874560929353);NM_017883#(-t:X_W9493933654673)	sp|Q9H1Z4|WDR13_HUMAN	yes	no	2	0.00013087	84.365	9124700
AAVYQEWLEK	R	10	0	1235.62	tr|A2VCS9|A2VCS9_HUMAN;tr|E7ETZ8|E7ETZ8_HUMAN;sp|Q49MG5|MAP9_HUMAN	tr|A2VCS9|A2VCS9_HUMAN	yes	no	2,3	3.5662e-05	110.38	1041000000
AAVYQPQPHPQPPPYGHCVTDSGVVYSVGMQWLK	R	34	0	3792.82	NM_002026#(-t:2_F9276042837580);NM_212476#(-t:2_F9276042837580);NM_212478#(-t:2_F9276042837580);NM_212482#(-t:2_F9276042837580);NM_212474#(-t:2_F9276042837580);NM_212475#(-t:2_F9276042837580);NM_054034#(-t:2_F9276042837580);NM_002026#(-s-s-:2_F9500787875661);NM_002026#(-s-:2_F8049055219366);NM_002026#(-s-:2_F3799624491842);NM_002026#(-s-:2_F6379810449276);NM_002026#(-s-:2_F3909075268751);NM_00202…	NM_002026#(-s-s-:2_F9500787875661)	no	no	4	1.0784e-33	98.009	21511000
AAVYSGISLK	M	10	0	1007.57	sp|Q14146|URB2_HUMAN	sp|Q14146|URB2_HUMAN	yes	yes	1,2	0.0021994	123.21	6746600
AAWAEYEAEK	K	10	0	1166.52	sp|P46100|ATRX_HUMAN;NM_000489#(-t:X_A7749609815306);sp|P46100-3|ATRX_HUMAN;NM_000489#(-s-:X_A9080346735495);sp|P46100-4|ATRX_HUMAN;NM_000489#(-s-s-s-s-:X_A1444847247418);NM_000489#(-s-s-s-:X_A6704081056179);NM_138270#(-t:X_A7749609815306);sp|P46100-5|ATRX_HUMAN;NM_138270#(-s-:X_A9080346735495);NM_000489#(-s-:X_A693253485053);NM_000489#(-s-s-s-s-:X_A7249488962665);NM_000489#(-s-s-s-s-:X_A72307872…	sp|P46100|ATRX_HUMAN	yes	no	2	0.00014085	100.88	120520000
AAWAEYEAEKK	K	11	1	1294.62	sp|P46100|ATRX_HUMAN;NM_000489#(-t:X_A7749609815306);sp|P46100-3|ATRX_HUMAN;NM_000489#(-s-:X_A9080346735495);sp|P46100-4|ATRX_HUMAN;NM_000489#(-s-s-s-s-:X_A1444847247418);NM_000489#(-s-s-s-:X_A6704081056179);NM_138270#(-t:X_A7749609815306);sp|P46100-5|ATRX_HUMAN;NM_138270#(-s-:X_A9080346735495);NM_000489#(-s-:X_A693253485053);NM_000489#(-s-s-s-s-:X_A7249488962665);NM_000489#(-s-s-s-s-:X_A72307872…	sp|P46100|ATRX_HUMAN	yes	no	3	4.0377e-05	84.479	11238000
AAWDVEWAVLK	K	11	0	1286.67	sp|Q9Y4B5|SOGA2_HUMAN;sp|Q9Y4B5-2|SOGA2_HUMAN;sp|Q9Y4B5-4|SOGA2_HUMAN	sp|Q9Y4B5|SOGA2_HUMAN	no	no	2	0.00051943	72.34	16881000
AAWEAGK	K	7	0	731.36	sp|P24752|THIL_HUMAN	sp|P24752|THIL_HUMAN	yes	yes	2	0.016744	87.284	228120000
AAWEAYLSR	K	9	0	1065.52	sp|P11172|UMPS_HUMAN;NM_000373#(-t:3_U7292758352025);tr|B5LY68|B5LY68_HUMAN;sp|P11172-2|UMPS_HUMAN;tr|B5LY72|B5LY72_HUMAN	sp|P11172|UMPS_HUMAN	yes	no	2	2.8409e-05	133.13	534620000
AAWEDPVEWVR	K	11	0	1356.65	sp|Q8NEY1-2|NAV1_HUMAN;sp|Q8NEY1-7|NAV1_HUMAN;NM_020443#(-s-e-s-:1_N9606529808300);sp|Q8NEY1-4|NAV1_HUMAN;NM_020443#(-s-:1_N728871459285);sp|Q8NEY1-3|NAV1_HUMAN;sp|Q8NEY1|NAV1_HUMAN;sp|Q8NEY1-5|NAV1_HUMAN	sp|Q8NEY1-2|NAV1_HUMAN	yes	no	2	0.00013044	79.659	22129000
AAWEHMK	R	7	0	871.401	NM_000414#(-t:5_H5364571169081);sp|P51659|DHB4_HUMAN;NM_000414#(f-:5_H5563645052591);NM_000414#(-t:5_H2537067668079);NM_000414#(f-T:5_H4358210172852);NM_000414#(-t:5_H8722990958702);NM_000414#(f-:5_H2491802307155);NM_000414#(f-:5_H8890678769726);NM_000414#(-s-s-:5_H4397780131434);NM_000414#(-t:5_H1542381585370);tr|E7EWE5|E7EWE5_HUMAN;NM_000414#(-s-:5_H545300857689);sp|P51659-3|DHB4_HUMAN;NM_00041…	NM_000414#(-t:5_H5364571169081)	yes	no	2	0.016901	87.284	50610000
AAWEVDSGR	R	9	0	989.457	sp|P11310|ACADM_HUMAN;sp|P11310-2|ACADM_HUMAN;tr|Q5T4U5|Q5T4U5_HUMAN;NM_000016#(-t:1_A3083100315619);NM_001127328#(-t:1_A3083100315619);NM_000016#(f-T:1_A427750622361);NM_001127328#(f-T:1_A427750622361);tr|B7Z9I1|B7Z9I1_HUMAN;NM_001127328#(-t-f-t:1_A3377523502140);NM_001127328#(f-:1_A784244701239);tr|B4DJE7|B4DJE7_HUMAN;NM_001127328#(f-:1_A1298736320287)	sp|P11310|ACADM_HUMAN	yes	no	2	0.0012664	90.15	244250000
AAWEVDSGRR	R	10	1	1145.56	sp|P11310|ACADM_HUMAN;sp|P11310-2|ACADM_HUMAN;tr|Q5T4U5|Q5T4U5_HUMAN;NM_000016#(-t:1_A3083100315619);NM_001127328#(-t:1_A3083100315619);NM_000016#(f-T:1_A427750622361);NM_001127328#(f-T:1_A427750622361);tr|B7Z9I1|B7Z9I1_HUMAN;NM_001127328#(-t-f-t:1_A3377523502140);NM_001127328#(f-:1_A784244701239);tr|B4DJE7|B4DJE7_HUMAN;NM_001127328#(f-:1_A1298736320287)	sp|P11310|ACADM_HUMAN	yes	no	2,3	2.6225e-07	139.38	65206000
AAWGEETDYTPVWCMR	R	16	0	1970.83	NM_000374#(f-:1_U1458673046577);NM_000374#(-t:1_U8175648673315);sp|P06132|DCUP_HUMAN;NM_000374#(-s-:1_U2779518880286);NM_000374#(f-:1_U8436642268547);NM_000374#(-s-s-:1_U8133360263937);NM_000374#(-s-:1_U3443693310024);NM_000374#(-t:1_U4881820301152);NM_000374#(-s-s-s-:1_U6351107914350);NM_000374#(-s-s-:1_U7542117655584);NM_000374#(rr:1_U4919925228799);NM_000374#(-s-:1_U6183574357455);NM_000374#(r…	NM_000374#(f-:1_U1458673046577)	yes	no	2,3	9.6524e-43	188.92	267130000
AAWVVQELPSLALPLYQYASESAPR	R	25	0	2758.43	sp|P18405|S5A1_HUMAN;tr|D6RDL6|D6RDL6_HUMAN;tr|D6RG03|D6RG03_HUMAN	sp|P18405|S5A1_HUMAN	yes	no	3	3.5318e-06	51.301	1313600
AAYADLLTPLISK	K	13	0	1374.78	sp|O94967-2|WDR47_HUMAN;sp|O94967|WDR47_HUMAN;sp|O94967-3|WDR47_HUMAN;tr|A8MX09|A8MX09_HUMAN;NM_014969#(f-t:1_W5300464579827);NM_014969#(-t:1_W4323218584082)	sp|O94967-2|WDR47_HUMAN	yes	no	2	4.4386e-08	78.814	39767000
AAYAGGLVLDPK	K	12	0	1173.64	sp|P09884|DPOLA_HUMAN;tr|A6NMQ1|A6NMQ1_HUMAN;NM_016937#(-s-:X_P2711248541612)	sp|P09884|DPOLA_HUMAN	yes	no	2	0.015471	44.511	28219000
AAYDIEVNTR	K	10	0	1150.56	NM_005803#(-s-s-:6_F4809303817697)	NM_005803#(-s-s-:6_F4809303817697)	no	no	2	4.2398e-08	161.17	239990000
AAYDREESTNLEDYEPNTVASLLK	K	24	1	2727.29	sp|Q15311|RBP1_HUMAN	sp|Q15311|RBP1_HUMAN	yes	yes	3	4.3308e-79	177.69	71977000
AAYDVSSFSFFQR	K	13	0	1523.7	NM_006555#(-s-:7_Y4787805987884);sp|O15498|YKT6_HUMAN;tr|B4DR94|B4DR94_HUMAN	NM_006555#(-s-:7_Y4787805987884)	yes	no	2,3	6.0909e-18	164.81	158980000
AAYEAELGDAR	K	11	0	1164.54	NM_170707#(f-:1_L836303796996);sp|P02545|LMNA_HUMAN;NM_170707#(f-T:1_L9094703564327);NM_170707#(-t:1_L415143080014);NM_170707#(f-:1_L7603918348686);NM_170707#(-t:1_L9265556070704);NM_170707#(f-T:1_L8115056813454);tr|Q6UYC3|Q6UYC3_HUMAN;NM_170708#(f-:1_L836303796996);sp|P02545-3|LMNA_HUMAN;NM_170708#(f-T:1_L9094703564327);NM_170708#(-t:1_L415143080014);NM_170708#(f-:1_L7603918348686);NM_170707#(-s…	NM_170707#(f-:1_L836303796996)	no	no	2	5.6047e-12	162.26	4175500000
AAYEAELGDARK	K	12	1	1292.64	NM_170707#(f-:1_L836303796996);sp|P02545|LMNA_HUMAN;NM_170707#(f-T:1_L9094703564327);NM_170707#(-t:1_L415143080014);NM_170707#(f-:1_L7603918348686);NM_170707#(-t:1_L9265556070704);NM_170707#(f-T:1_L8115056813454);tr|Q6UYC3|Q6UYC3_HUMAN;NM_170708#(f-:1_L836303796996);sp|P02545-3|LMNA_HUMAN;NM_170708#(f-T:1_L9094703564327);NM_170708#(-t:1_L415143080014);NM_170708#(f-:1_L7603918348686);NM_170707#(-s…	NM_170707#(f-:1_L836303796996)	no	no	2,3	3.0576e-16	165.78	377160000
AAYEAELGDARKTLDSVAK	K	19	2	2007.03	NM_170707#(f-:1_L836303796996);sp|P02545|LMNA_HUMAN;NM_170707#(f-T:1_L9094703564327);NM_170707#(-t:1_L415143080014);NM_170707#(f-:1_L7603918348686);NM_170707#(-t:1_L9265556070704);NM_170707#(f-T:1_L8115056813454);tr|Q6UYC3|Q6UYC3_HUMAN;NM_170708#(f-:1_L836303796996);sp|P02545-3|LMNA_HUMAN;NM_170708#(f-T:1_L9094703564327);NM_170708#(-t:1_L415143080014);NM_170708#(f-:1_L7603918348686);NM_170707#(-s…	NM_170707#(f-:1_L836303796996)	no	no	4	0.0089115	64.705	2217700
AAYEDFNVQLR	R	11	0	1324.64	sp|Q9HC84|MUC5B_HUMAN;tr|E9PBJ0|E9PBJ0_HUMAN	sp|Q9HC84|MUC5B_HUMAN	yes	no	2	0.0017378	66.56	804610
AAYEHFHR	K	8	0	1029.48	tr|K7EKI8|K7EKI8_HUMAN;sp|O60437|PEPL_HUMAN;NM_002705#(r:16_P5291898932204);tr|K7EQ71|K7EQ71_HUMAN	tr|K7EKI8|K7EKI8_HUMAN	yes	no	2	0.0043587	91.9	6964500
AAYFDMIR	K	8	0	985.469	NM_002844#(f-T:6_P5345623910335);sp|Q15262|PTPRK_HUMAN;sp|Q15262-2|PTPRK_HUMAN;sp|Q15262-3|PTPRK_HUMAN;tr|F5GXI4|F5GXI4_HUMAN;tr|Q5TG12|Q5TG12_HUMAN;tr|B7ZMG0|B7ZMG0_HUMAN;tr|E9PGC5|E9PGC5_HUMAN;NM_002844#(f-T:6_P8187474015959)	NM_002844#(f-T:6_P5345623910335)	yes	no	2	0.0043981	84.498	30387000
AAYFGIYDTAK	R	11	0	1218.59	sp|P05141|ADT2_HUMAN;NM_001152#(f-T:X_S1645310826327);NM_001152#(-s-:X_S8707808483522);NM_001152#(r:X_S6202071513510);NM_001152#(f-:X_S8337142898779);NM_001152#(-t:X_S7840427023911);NM_001152#(f-:X_S3519475279796)	sp|P05141|ADT2_HUMAN	yes	no	2,3	1.1356e-05	111.86	13504000000
AAYFGVYDTAK	R	11	0	1204.58	sp|P12235|ADT1_HUMAN;sp|P12236|ADT3_HUMAN;NM_001636#(-s-:X_S2470392257566)	sp|P12236|ADT3_HUMAN	no	no	2,3	9.6002e-09	128.01	7984400000
AAYIYFTDFCPDNLFNK	K	17	0	2097.95	sp|O00186|STXB3_HUMAN	sp|O00186|STXB3_HUMAN	yes	yes	2,3	2.0217e-06	65.231	92965000
AAYLLGCSLEELSSAIFK	K	18	0	1971	tr|J3KNX9|J3KNX9_HUMAN;sp|Q92614|MY18A_HUMAN;sp|Q92614-4|MY18A_HUMAN;sp|Q92614-3|MY18A_HUMAN;sp|Q92614-5|MY18A_HUMAN;sp|Q92614-2|MY18A_HUMAN	tr|J3KNX9|J3KNX9_HUMAN	no	no	2,3	2.1244e-13	93.226	19950000
AAYLNMSEDPSHPSMALNTR	R	20	0	2204	NM_001273#(-s-s-s-s-s-s-s-:12_C7731381762417);NM_001273#(-s-s-s-:12_C3136388242159);NM_001273#(-s-s-s-s-s-s-s-s-s-:12_C1345826859817);NM_001273#(-s-s-s-s-s-s-s-s-:12_C7623426589067);NM_001273#(-s-s-s-s-s-s-s-:12_C9377484245357);NM_001273#(-s-s-s-s-s-s-s-s-s-:12_C288437313110);NM_001273#(-s-s-s-:12_C7594178483629);NM_001273#(-s-s-s-s-s-s-s-s-:12_C9607606340520);NM_001273#(-s-s-s-s-s-s-s-s-s-s-s-:1…	NM_001273#(-t:12_C8240482044308)	no	no	2,3	2.7585e-86	231.83	1057300000
AAYLQETGKPLDETLK	K	16	1	1775.93	sp|P04083|ANXA1_HUMAN;NM_000700#(-s-:9_A7563727233224);NM_000700#(-s-:9_A8721723659039);NM_000700#(-s-s-:9_A1542871433161);NM_000700#(-s-s-s-:9_A3122332996920);tr|Q5T3N1|Q5T3N1_HUMAN;NM_000700#(-s-:9_A3296744874475);NM_000700#(-s-s-:9_A3467258516712);NM_000700#(-s-:9_A9254099011727);tr|Q5T3N0|Q5T3N0_HUMAN;NM_000700#(f-:9_A2807033342050)	sp|P04083|ANXA1_HUMAN	yes	no	2,3	2.5632e-20	146.3	7079100000
AAYLQETGKPLDETLKK	K	17	2	1904.03	sp|P04083|ANXA1_HUMAN;NM_000700#(-s-:9_A7563727233224);NM_000700#(-s-:9_A8721723659039);NM_000700#(-s-s-:9_A1542871433161);NM_000700#(-s-s-s-:9_A3122332996920);tr|Q5T3N1|Q5T3N1_HUMAN;NM_000700#(-s-:9_A3296744874475);NM_000700#(-s-s-:9_A3467258516712);NM_000700#(-s-:9_A9254099011727);tr|Q5T3N0|Q5T3N0_HUMAN;NM_000700#(f-:9_A2807033342050)	sp|P04083|ANXA1_HUMAN	yes	no	2,3,4	7.1467e-19	144.97	10689000000
AAYLQWR	M	7	0	906.471	sp|Q9H270|VPS11_HUMAN	sp|Q9H270|VPS11_HUMAN	yes	yes	2	0.018725	75.311	2129000
AAYLSDPR	K	8	0	891.445	sp|P78527|PRKDC_HUMAN	sp|P78527|PRKDC_HUMAN	yes	yes	2	0.004931	82.279	949460000
AAYNLVR	R	7	0	805.445	sp|Q14019|COTL1_HUMAN	sp|Q14019|COTL1_HUMAN	yes	yes	2	0.0018918	133.99	2236400000
AAYNPGQAVPWNAVK	K	15	0	1584.8	NM_199205#(-t:8_K5324873092948);NM_199205#(-s-s-:8_K6872774323728);NM_199205#(-s-s-s-:8_K9059340477113);NM_199205#(-s-s-s-:8_K9207909248350);NM_199205#(-s-s-s-s-:8_K2900739272161);NM_199205#(-s-s-s-s-s-:8_K6130027060012);NM_199205#(-s-:8_K8250231631129);NM_199205#(r:8_K9584614371810);NM_199205#(-s-s-:8_K2857109526334);NM_199205#(-s-s-s-s-s-:8_K6335344178663);NM_199205#(-s-s-s-s-s-s-:8_K8400096936…	sp|Q8N163|K1967_HUMAN	no	no	2	8.1404e-15	117.93	1148500000
AAYNQVK	K	7	0	792.413	sp|P22695|QCR2_HUMAN;NM_003366#(-s-:16_U2956004151508);tr|H3BRG4|H3BRG4_HUMAN;NM_003366#(-s-:16_U7408744289415);NM_003366#(-s-:16_U1331608945709);NM_003366#(f-:16_U4139463639807);NM_003366#(-s-s-:16_U9795540855036);NM_003366#(-s-s-:16_U2991940814214);NM_003366#(-s-:16_U3239334091144);NM_003366#(-s-s-s-s-:16_U4338944628180);NM_003366#(-s-s-s-:16_U8655995845941);NM_003366#(-s-s-s-:16_U2170741054662…	sp|P22695|QCR2_HUMAN	yes	no	2	0.031192	71.258	20660000
AAYNVTLLNFMDPQK	R	15	0	1723.86	sp|Q9C0B1|FTO_HUMAN;NM_001080432#(-s-:16_F5396954612252);NM_001080432#(f-:16_F8901857095392)	sp|Q9C0B1|FTO_HUMAN	yes	no	2,3	1.1556e-26	151.22	203660000
AAYPDLENPPLLVTPSQQAK	K	20	0	2151.12	sp|P54136|SYRC_HUMAN;NM_002887#(f-:5_R955990184598);NM_002887#(-s-:5_R4667788266737);sp|P54136-2|SYRC_HUMAN;NM_002887#(-s-:5_R8663735810357);tr|E5RJM9|E5RJM9_HUMAN	sp|P54136|SYRC_HUMAN	yes	no	2,3	5.6301e-12	85.855	2286500000
AAYQVAALPK	R	10	0	1030.58	sp|P52758|UK114_HUMAN;tr|E5RI71|E5RI71_HUMAN;NM_005836#(-s-:8_H7109365545366);tr|H0YB34|H0YB34_HUMAN;tr|H0YBX3|H0YBX3_HUMAN;NM_005836#(-s-:8_H6262808604661)	sp|P52758|UK114_HUMAN	yes	no	2	0.00038111	89.047	463830000
AAYSFYNVHTQTPLLDLMSDALVLAK	K	26	0	2880.47	NM_021079#(-s-s-:17_N6798923930159);NM_021079#(-s-s-s-s-:17_N8370053934854);NM_021079#(-s-s-s-:17_N5131280726851);sp|P30419|NMT1_HUMAN;NM_021079#(-t:17_N9266052844712);NM_021079#(-t:17_N6875929493127);sp|P30419-2|NMT1_HUMAN;NM_021079#(-s-:17_N9729531170573);NM_021079#(-s-:17_N3463083176167);NM_021079#(-s-s-:17_N7972139972026);NM_021079#(-s-:17_N9311113782677);NM_021079#(-s-:17_N458855865327);NM_0…	sp|P30419|NMT1_HUMAN	no	no	3	1.15e-81	150.94	28987000
AAYSNFWCGMTSQGYYK	R	17	0	2032.84	sp|Q8NBJ5|GT251_HUMAN;tr|M0QYH0|M0QYH0_HUMAN	sp|Q8NBJ5|GT251_HUMAN	yes	no	2,3	1.0058e-37	150.39	161190000
AAYTFNIEAVGFSK	R	14	0	1516.76	tr|D6R9U7|D6R9U7_HUMAN;NM_006467#(-t:5_P1600850658311);sp|O15318|RPC7_HUMAN;tr|D6R921|D6R921_HUMAN;tr|D6RIT0|D6RIT0_HUMAN;tr|D6RJH6|D6RJH6_HUMAN;tr|D6REQ0|D6REQ0_HUMAN	tr|D6R9U7|D6R9U7_HUMAN	yes	no	2,3	8.8553e-08	88.706	4315000
AAYWEEEPAEVR	K	12	0	1448.66	NM_007190#(-t:10_S9574156845867);sp|Q9Y6Y8-2|S23IP_HUMAN;tr|H7C0V8|H7C0V8_HUMAN;tr|H7C4C4|H7C4C4_HUMAN;NM_007190#(-t:10_S3549894244430);NM_007190#(f-:10_S6888737211000);sp|Q9Y6Y8|S23IP_HUMAN;tr|F5H0L8|F5H0L8_HUMAN	NM_007190#(-t:10_S3549894244430)	no	no	2,3	2.4211e-14	142.08	558590000
AAYWEEEPAEVRR	K	13	1	1604.76	NM_007190#(-t:10_S9574156845867);sp|Q9Y6Y8-2|S23IP_HUMAN;tr|H7C0V8|H7C0V8_HUMAN;tr|H7C4C4|H7C4C4_HUMAN;NM_007190#(-t:10_S3549894244430);NM_007190#(f-:10_S6888737211000);sp|Q9Y6Y8|S23IP_HUMAN;tr|F5H0L8|F5H0L8_HUMAN	NM_007190#(-t:10_S3549894244430)	no	no	3	3.7141e-07	94.538	6902100
ACAAGTPAVIR	R	11	0	1085.57	tr|A6NEM2|A6NEM2_HUMAN;sp|P51610|HCFC1_HUMAN;sp|P51610-2|HCFC1_HUMAN;NM_005334#(-s-:X_H1477431472890)	tr|A6NEM2|A6NEM2_HUMAN	no	no	2	0.00064751	69.721	20360000
ACADAGLLDESFLR	K	14	0	1536.72	NM_006048#(-s-:1_U8988362958136);sp|O95155-2|UBE4B_HUMAN;NM_001105562#(-s-:1_U8988362958136);sp|O95155|UBE4B_HUMAN;NM_006048#(-s-:1_U316276541655);NM_001105562#(-s-:1_U316276541655);NM_006048#(-s-:1_U6736485034781);NM_001105562#(-s-:1_U6736485034781);sp|O95155-3|UBE4B_HUMAN;NM_006048#(f-:1_U1354803309526);NM_001105562#(f-:1_U1354803309526)	NM_006048#(-s-:1_U8988362958136)	yes	no	2	5.4964e-17	137.62	215920000
ACADAGLLDESFLRR	K	15	1	1692.83	NM_006048#(-s-:1_U8988362958136);sp|O95155-2|UBE4B_HUMAN;NM_001105562#(-s-:1_U8988362958136);sp|O95155|UBE4B_HUMAN;NM_006048#(-s-:1_U316276541655);NM_001105562#(-s-:1_U316276541655);NM_006048#(-s-:1_U6736485034781);NM_001105562#(-s-:1_U6736485034781);sp|O95155-3|UBE4B_HUMAN;NM_006048#(f-:1_U1354803309526);NM_001105562#(f-:1_U1354803309526)	NM_006048#(-s-:1_U8988362958136)	yes	no	3	6.6763e-12	109.83	3124400
ACADATLSQITNNIDPVGR	K	19	0	2014.97	sp|P62873|GBB1_HUMAN;NM_002074#(-t-e-e-e-f-:1_G7457699697122);NM_002074#(-s-:1_G2168716437700);tr|F6UT28|F6UT28_HUMAN;NM_002074#(-t:1_G7877996344402);NM_002074#(f-T:1_G1562467676837);tr|B1AKQ8|B1AKQ8_HUMAN	sp|P62873|GBB1_HUMAN	yes	no	2,3	3.9017e-108	274.23	2519700000
ACAEIAAQR	K	9	0	988.476	sp|Q5T4S7-3|UBR4_HUMAN;NM_020765#(f-:1_U8505762085531);sp|Q5T4S7|UBR4_HUMAN;NM_020765#(f-T:1_U7529296726766);sp|Q5T4S7-2|UBR4_HUMAN;sp|Q5T4S7-4|UBR4_HUMAN;NM_020765#(-t:1_U7631085373844)	sp|Q5T4S7-3|UBR4_HUMAN	yes	no	2	0.00096541	104.06	49558000
ACAELHQNVNVK	R	12	0	1381.68	NM_018206#(-s-:16_V6708189627771);NM_018206#(-s-s-:16_V8717123666768);NM_018206#(-s-s-s-:16_V1380439438980);NM_018206#(-s-s-s-s-s-:16_V5711723122287);NM_018206#(-s-s-s-s-:16_V6717174759122);NM_018206#(-s-s-s-s-s-s-s-:16_V3338891551508);NM_018206#(-s-s-s-s-s-s-:16_V8650312569298);NM_018206#(-s-s-:16_V4214908876454);NM_018206#(-s-:16_V6129955692295);NM_018206#(-s-s-s-s-s-:16_V8798916116675);NM_0182…	NM_018206#(-t:16_V3420155058910)	no	no	2,3	4.7671e-16	182.71	1650700000
ACALQVLSAILEGSK	R	15	0	1558.84	sp|Q6AI08|HEAT6_HUMAN;tr|K7EIX2|K7EIX2_HUMAN	sp|Q6AI08|HEAT6_HUMAN	yes	no	2,3	1.07e-15	125.73	186800000
ACALSIEESCR	R	11	0	1294.56	sp|P31040|DHSA_HUMAN;NM_004168#(-t:5_S2897159470236);NM_004168#(f-T:5_S6668290808792);NM_004168#(-t:5_S4250242643143);tr|D6RFM5|D6RFM5_HUMAN;tr|E9PBJ5|E9PBJ5_HUMAN;NM_004168#(f-:5_S6938348612207);NM_004168#(-s-s-:5_S6915225015128);NM_004168#(-s-s-:5_S225948812879);NM_004168#(-s-:5_S3695207634622);NM_004168#(-s-s-:5_S4095121953031);NM_004168#(-t:5_S1826325406770);NM_004168#(-s-s-s-:5_S281303410655…	sp|P31040|DHSA_HUMAN	yes	no	2	0.049205	22.578	1835300
ACALSIEESCRPGDK	R	15	1	1691.76	sp|P31040|DHSA_HUMAN;NM_004168#(-t:5_S2897159470236);NM_004168#(f-T:5_S6668290808792);tr|D6RFM5|D6RFM5_HUMAN;tr|E9PBJ5|E9PBJ5_HUMAN;NM_004168#(f-:5_S6938348612207);NM_004168#(-s-s-:5_S6915225015128);NM_004168#(-s-s-:5_S225948812879);NM_004168#(-s-:5_S3695207634622);NM_004168#(-s-s-:5_S4095121953031);NM_004168#(-t:5_S1826325406770);NM_004168#(-s-s-s-:5_S2813034106557);NM_004168#(-s-s-s-s-:5_S82531…	sp|P31040|DHSA_HUMAN	yes	no	2,3	4.5893e-16	148.57	1754700000
ACALSQINTK	K	10	0	1104.56	sp|O95825|QORL1_HUMAN;NM_145858#(f-T:21_C9712601607212);tr|A6NMA8|A6NMA8_HUMAN;NM_145858#(f-T:21_C5988349652124);NM_145858#(-t:21_C8191545186771);tr|A6NND8|A6NND8_HUMAN;NM_145858#(f-:21_C6031690190094);tr|A6NHJ8|A6NHJ8_HUMAN;tr|B3KQ77|B3KQ77_HUMAN;NM_145858#(-s-:21_C1465867663011);tr|F8WF64|F8WF64_HUMAN;tr|C9JAL0|C9JAL0_HUMAN;tr|C9JZK8|C9JZK8_HUMAN	sp|O95825|QORL1_HUMAN	yes	no	2	0.0030062	63.32	19543000
ACANPAAGSVILLENLR	K	17	0	1767.93	NM_000291#(f-T:X_P3853256651548)	NM_000291#(f-T:X_P3853256651548)	no	no	2,3	9.8557e-48	210.08	17579000000
ACAQGTFKPLSGEGSCQPCPANSHSNTIGSAVCQCR	R	36	1	3893.68	sp|P54760|EPHB4_HUMAN;tr|Q96L35|Q96L35_HUMAN	sp|P54760|EPHB4_HUMAN	yes	no	4	0.066697	1.0908	220320
ACAQTVLAVLYYEETK	K	16	0	1857.92	tr|B2RDB2|B2RDB2_HUMAN;sp|Q96A29|FUCT1_HUMAN	tr|B2RDB2|B2RDB2_HUMAN	yes	no	3	0.078243	14.929	549510
ACARPLISVYSEK	M	13	1	1492.77	sp|P36578|RL4_HUMAN;NM_000968#(r:15_R2870063077921);NM_000968#(f-:15_R886591974770);NM_000968#(r:15_R7635005758227);NM_000968#(r:15_R6116696733344);NM_000968#(-t:15_R3982785077533);NM_000968#(-s-:15_R1052402022736);NM_000968#(f-:15_R2170467347189);NM_000968#(-t:15_R3248584201421);NM_000968#(-s-:15_R8501808115407);NM_000968#(f-:15_R902860310186);NM_000968#(-t:15_R2661724644054);NM_000968#(-t:15_R8…	sp|P36578|RL4_HUMAN	no	no	2,3	5.233e-08	136.3	147380000
ACARPLISVYSEKGESSGK	M	19	2	2038.02	sp|P36578|RL4_HUMAN;NM_000968#(r:15_R2870063077921);NM_000968#(f-:15_R886591974770);NM_000968#(r:15_R7635005758227);NM_000968#(r:15_R6116696733344);NM_000968#(-t:15_R3982785077533);NM_000968#(-s-:15_R1052402022736);NM_000968#(f-:15_R2170467347189);NM_000968#(-t:15_R3248584201421);NM_000968#(-s-:15_R8501808115407);NM_000968#(f-:15_R902860310186);NM_000968#(-t:15_R2661724644054);NM_000968#(-t:15_R8…	sp|P36578|RL4_HUMAN	no	no	3	7.62e-31	175.59	50121000
ACAVETSVDLSEISSK	R	16	0	1694.8	tr|E9PEI0|E9PEI0_HUMAN;sp|Q69YH5|CDCA2_HUMAN	tr|E9PEI0|E9PEI0_HUMAN	yes	no	2	1.9612e-10	89.484	3008300
ACCISTGGHSQCSESLPVR	R	19	0	2104.91	sp|Q53EP0|FND3B_HUMAN	sp|Q53EP0|FND3B_HUMAN	yes	yes	3	1.8029e-19	100.02	6066900
ACCSLGGEQGQPVHMGDPELLGIK	R	24	0	2552.18	sp|Q7Z3D6|CN159_HUMAN;sp|Q7Z3D6-2|CN159_HUMAN;NM_024952#(r:14_C5246469652628);NM_001102368#(r:14_C5246469652628);sp|Q7Z3D6-3|CN159_HUMAN;NM_024952#(-s-:14_C9766298692710);NM_001102368#(-s-:14_C9766298692710);tr|H0YB09|H0YB09_HUMAN;sp|Q7Z3D6-4|CN159_HUMAN;tr|G8JLP2|G8JLP2_HUMAN;tr|H0YB62|H0YB62_HUMAN	sp|Q7Z3D6|CN159_HUMAN	yes	no	3	5.1892e-54	141.45	149420000
ACDELELHQR	K	10	0	1269.58	tr|Q5VUI0|Q5VUI0_HUMAN;NM_212479#(f-:10_Z2689255488787);NM_212479#(-t:10_Z3808980380420);NM_212479#(-s-:10_Z4246870427506);NM_006624#(f-:10_Z2689255488787);NM_006624#(-t:10_Z3808980380420);tr|F6UH50|F6UH50_HUMAN;NM_212479#(f-T:10_Z9175598061734);sp|Q15326-3|ZMY11_HUMAN;tr|E7ENI9|E7ENI9_HUMAN;NM_006624#(-s-:10_Z4246870427506);tr|J3QKD2|J3QKD2_HUMAN;NM_006624#(f-T:10_Z9175598061734);sp|Q15326|ZMY11…	tr|Q5VUI0|Q5VUI0_HUMAN	no	no	3	0.00012802	82.417	8085000
ACDELVEEMEHYGK	K	14	0	1708.71	sp|O00469-2|PLOD2_HUMAN;tr|E7ETU9|E7ETU9_HUMAN;sp|O00469|PLOD2_HUMAN;tr|B3KWS3|B3KWS3_HUMAN	sp|O00469-2|PLOD2_HUMAN	yes	no	2,3	9.8752e-24	182.33	878330000
ACDESFQPLGDIMK	R	14	0	1609.71	sp|Q6Y7W6-4|PERQ2_HUMAN;NM_001103148#(-t:2_G1434228085054);NM_015575#(-t:2_G1434228085054);sp|Q6Y7W6|PERQ2_HUMAN;tr|I1E4Y6|I1E4Y6_HUMAN;NM_001103148#(f-T:2_G9660850217651);NM_015575#(f-T:2_G9660850217651);NM_001103147#(-t:2_G1434228085054);sp|Q6Y7W6-3|PERQ2_HUMAN;NM_001103148#(r:2_G7593933829005);NM_015575#(r:2_G7593933829005);NM_001103148#(-t:2_G4163523102190);NM_015575#(-t:2_G4163523102190);NM_…	sp|Q6Y7W6-4|PERQ2_HUMAN	yes	no	2,3	1.6546e-17	140.31	292880000
ACDESVLMDLK	K	11	0	1279.58	sp|Q9UJV9|DDX41_HUMAN;tr|J3KNN5|J3KNN5_HUMAN;NM_016222#(r:5_D268806427229);NM_016222#(f-T:5_D8882198919587);NM_016222#(-s-:5_D3822402540833);NM_016222#(f-:5_D9190271848588);NM_016222#(-t:5_D9324150166251);NM_016222#(-s-s-:5_D7445362473956);NM_016222#(-s-s-:5_D3536030044380);NM_016222#(f-t:5_D2373841712892);NM_016222#(-s-:5_D153422672764);NM_016222#(-s-:5_D2434175399856);NM_016222#(-s-s-:5_D638587…	sp|Q9UJV9|DDX41_HUMAN	yes	no	2	5.843e-05	98.156	288410000
ACDFLLSR	R	8	0	980.475	NM_002340#(-s-:21_L2503040626078);sp|P48449|ERG7_HUMAN;NM_002340#(-s-s-:21_L3794059233015);NM_002340#(-s-:21_L9642294181738);NM_002340#(-s-:21_L1996225732907);sp|P48449-3|ERG7_HUMAN;sp|P48449-2|ERG7_HUMAN;NM_002340#(-s-s-s-:21_L2281359819077);NM_002340#(-s-s-:21_L1320179878127);NM_002340#(-s-s-s-:21_L8142259808510);NM_002340#(-s-s-s-s-:21_L5459815629640);NM_002340#(-s-s-:21_L132299724080);NM_0023…	NM_002340#(-s-:21_L2503040626078)	yes	no	2	0.0012662	154.71	409180000
ACDGINDCGDQSDELCCK	K	18	0	2115.76	tr|G3XAM2|G3XAM2_HUMAN;sp|P05156|CFAI_HUMAN;tr|E7ETH0|E7ETH0_HUMAN;NM_000204#(f-T:4_C6173751955652);NM_000204#(-s-:4_C8273495609333)	tr|G3XAM2|G3XAM2_HUMAN	yes	no	3	1.3507e-19	99.044	275960
ACDGNVDHAATHITNR	R	16	0	1750.78	NM_016118#(-s-:7_N3836121564682);sp|Q9Y5A7-2|NUB1_HUMAN;NM_016118#(f-:7_N6236796965193);sp|Q9Y5A7|NUB1_HUMAN;tr|H3BM14|H3BM14_HUMAN;tr|H3BM74|H3BM74_HUMAN;NM_016118#(-t:7_N7639680814361);NM_016118#(-s-:7_N7410618109870);tr|H7C5N1|H7C5N1_HUMAN;tr|H7C5E1|H7C5E1_HUMAN	NM_016118#(-s-:7_N3836121564682)	yes	no	3,4	1.5231e-10	81.346	18781000
ACDILAIDK	K	9	0	1017.52	sp|O00273-2|DFFA_HUMAN;tr|K7ERT1|K7ERT1_HUMAN;NM_004401#(-s-:1_D6055423902596);sp|O00273|DFFA_HUMAN	sp|O00273|DFFA_HUMAN	no	no	2	0.0015297	83.869	311820000
ACDLGHIWACANASR	K	15	0	1700.75	sp|Q96BR5|SELR1_HUMAN	sp|Q96BR5|SELR1_HUMAN	yes	yes	3	1.8248e-07	75.911	16615000
ACDLPAWVHFPDTER	R	15	0	1812.83	tr|H7BXI1|H7BXI1_HUMAN;sp|A0FGR8-6|ESYT2_HUMAN;NM_020728#(f-T:7_F8563985310606);sp|A0FGR8-2|ESYT2_HUMAN;NM_020728#(f-T:7_F9923960184907);sp|A0FGR8|ESYT2_HUMAN;NM_020728#(-s-:7_F7295625317734);NM_020728#(-s-:7_F7696976854783);NM_020728#(-s-s-:7_F4142992696396);NM_020728#(-s-:7_F254853328034);NM_020728#(-s-:7_F4032984822866);NM_020728#(-s-:7_F9310069632393);NM_020728#(-s-s-s-:7_F2401308127514);NM_0…	tr|H7BXI1|H7BXI1_HUMAN	yes	no	2,3	9.2116e-26	142.95	1102100000
ACDMHVADMLVK	R	12	0	1388.63	sp|P42575|CASP2_HUMAN	sp|P42575|CASP2_HUMAN	yes	yes	3	6.1488e-06	92.856	15502000
ACDSVTSNVLPLLLEQFHK	R	19	0	2170.11	NM_022362#(-s-:10_M340207579775)	NM_022362#(-s-:10_M340207579775)	no	no	3,4	1.66e-53	165.3	843850000
ACDTLLMCIVTVMNHGLR	R	18	0	2103.01	NM_002224#(-s-:6_I240202370354);NM_002224#(-s-:6_I2616283792837);NM_002224#(-t:6_I8811799942120);sp|Q14573|ITPR3_HUMAN;NM_002224#(-s-:6_I9827089096273);NM_002224#(-s-:6_I3101438647398);NM_002224#(-s-s-s-s-:6_I3546704442235);NM_002224#(-s-s-s-:6_I8869441385245);NM_002224#(-s-s-:6_I890546053797);NM_002224#(-s-:6_I2477360018433);NM_002224#(-s-s-:6_I161391310587);NM_002224#(-s-:6_I8980404188767);NM_0…	NM_002224#(-s-:6_I240202370354)	yes	no	3	5.2198e-09	75.018	3656900
ACDYIQELR	K	9	0	1166.54	tr|Q7Z5Y1|Q7Z5Y1_HUMAN;tr|B1AQP1|B1AQP1_HUMAN;sp|P22415|USF1_HUMAN;tr|E9PME6|E9PME6_HUMAN	tr|Q7Z5Y1|Q7Z5Y1_HUMAN	yes	no	2	0.015223	60.102	0
ACEAITVGK	R	9	0	947.475	NM_005275#(r:6_G8944689606773);sp|P36915|GNL1_HUMAN;NM_005275#(-s-:6_G2686968723538);NM_005275#(r:6_G2190584392093);tr|B4DWZ0|B4DWZ0_HUMAN;tr|B0V0L0|B0V0L0_HUMAN;tr|E7ETJ1|E7ETJ1_HUMAN;sp|P36915-2|GNL1_HUMAN	NM_005275#(r:6_G8944689606773)	yes	no	2	0.0032752	74.376	92963000
ACEFAGFQCQIQFGPHNEQK	K	20	0	2395.05	NM_006289#(-s-s-:9_T5448982096712);NM_006289#(-s-s-s-:9_T6529221633583);NM_006289#(-s-s-s-s-s-s-:9_T9877463915433);NM_006289#(-s-s-s-s-s-:9_T6437789503476);NM_006289#(-s-s-s-s-s-:9_T8209657931625);NM_006289#(-s-s-s-s-s-s-s-s-s-:9_T936014498235);NM_006289#(-s-s-s-s-s-s-s-s-:9_T9102193833970);NM_006289#(-s-s-s-s-s-s-s-s-s-s-:9_T7131065426359);NM_006289#(-s-s-s-:9_T1596020102767)	NM_006289#(-s-s-s-:9_T1596020102767)	no	no	2,3,4	9.4766e-69	181.4	716800000
ACEGLMLLVSLPEPAAAK	K	18	0	1868.97	sp|Q5W0V3|F16B1_HUMAN;NM_020940#(r:10_F6023214181160);sp|Q5W0V3-2|F16B1_HUMAN;NM_020940#(-t:10_F5294645390791)	sp|Q5W0V3|F16B1_HUMAN	yes	no	2,3	2.5936e-05	70.416	10300000
ACEHFISDLSINSLYCLSDEK	K	21	0	2500.12	NM_012308#(-s-:11_F9383143988752);sp|Q9Y2K7|KDM2A_HUMAN;NM_012308#(-s-s-:11_F4320133766219);NM_012308#(-s-:11_F4725527770346);NM_012308#(-s-:11_F6413055137234);sp|Q9Y2K7-2|KDM2A_HUMAN;tr|E9PIL6|E9PIL6_HUMAN;tr|D4QA03|D4QA03_HUMAN	NM_012308#(-s-:11_F9383143988752)	yes	no	3	1.5046e-11	78.708	3373500
ACELFLR	K	7	0	907.459	sp|Q8IYI6|EXOC8_HUMAN	sp|Q8IYI6|EXOC8_HUMAN	yes	yes	2	0.011792	110.34	83378000
ACELWEQILQDHPTDMLALK	K	20	0	2410.17	NM_017931#(-s-:22_T3120538173315);sp|Q5R3I4|TTC38_HUMAN;NM_017931#(r:22_T3019732670695);NM_017931#(f-T:22_T8029924157448);NM_017931#(-s-:22_T3353504538088);NM_017931#(-s-:22_T9479827316022);tr|A9UJP8|A9UJP8_HUMAN;tr|H7C2L7|H7C2L7_HUMAN	NM_017931#(-s-:22_T3120538173315)	yes	no	3	3.1077e-59	156.73	135380000
ACEMNGEECAEDLR	R	14	0	1682.63	NM_006060#(-s-:7_I3720040293047);sp|Q13422|IKZF1_HUMAN;sp|Q13422-4|IKZF1_HUMAN;sp|Q13422-3|IKZF1_HUMAN;sp|Q13422-5|IKZF1_HUMAN;sp|Q13422-7|IKZF1_HUMAN;tr|Q69BM4|Q69BM4_HUMAN	NM_006060#(-s-:7_I3720040293047)	no	no	2	8.0268e-10	112.42	4906500
ACENSCILYSDLGLPK	K	16	0	1838.85	sp|Q14201|BTG3_HUMAN;sp|Q14201-2|BTG3_HUMAN	sp|Q14201|BTG3_HUMAN	yes	no	2	5.281e-14	97.235	3955100
ACEPIIQNFCHDVADNQIDSGDLMECLIQNK	R	31	0	3646.62	sp|Q92896|GSLG1_HUMAN;sp|Q92896-2|GSLG1_HUMAN;NM_012201#(-s-:16_G4299808482478);sp|Q92896-3|GSLG1_HUMAN;NM_012201#(-s-:16_G1340843076870);NM_012201#(-s-:16_G3291530177126);NM_012201#(-s-s-:16_G8254196572726);NM_012201#(-s-:16_G2971863059165);NM_012201#(-s-s-s-:16_G980427397953);NM_012201#(-s-s-:16_G6749244417247);NM_012201#(-s-s-s-:16_G3249336930468);NM_012201#(-s-:16_G2693547985225);NM_012201#(-…	sp|Q92896|GSLG1_HUMAN	yes	no	3,4	9.6156e-05	32.266	63521000
ACESCYATQSHQWYSWGPPNMQCR	R	24	0	3003.19	tr|E7EQY4|E7EQY4_HUMAN;sp|Q9BTC8-2|MTA3_HUMAN;tr|E7EV10|E7EV10_HUMAN;sp|Q9BTC8|MTA3_HUMAN;tr|D6W5A2|D6W5A2_HUMAN;NM_020744#(-s-:2_M4799415547954)	tr|E7EQY4|E7EQY4_HUMAN	yes	no	3	4.9999e-95	197.46	41665000
ACEVALEEIK	K	10	0	1160.57	NM_006421#(-t:8_A9087269964947);sp|Q9Y6D6|BIG1_HUMAN;NM_006421#(-s-s-:8_A860484382726);NM_006421#(f-t:8_A9378226435083);NM_006421#(f-:8_A9132556783852);NM_006421#(-s-:8_A8216118284602);NM_006421#(-s-:8_A1863673434487);tr|E5RJN9|E5RJN9_HUMAN	NM_006421#(-t:8_A9087269964947)	yes	no	2	0.00064542	76.843	22467000
ACEVALEEIKAETEK	K	15	1	1718.84	NM_006421#(-t:8_A9087269964947);sp|Q9Y6D6|BIG1_HUMAN;NM_006421#(-s-s-:8_A860484382726);NM_006421#(f-t:8_A9378226435083);NM_006421#(f-:8_A9132556783852);NM_006421#(-s-:8_A8216118284602);NM_006421#(-s-:8_A1863673434487);tr|E5RJN9|E5RJN9_HUMAN	NM_006421#(-t:8_A9087269964947)	yes	no	3	1.1254e-15	139.58	7077800
ACFAELR	K	7	0	865.412	NM_006187#(-t:12_O4623133757652);sp|Q9Y6K5|OAS3_HUMAN;NM_006187#(f-:12_O9084186452557)	NM_006187#(-t:12_O4623133757652)	yes	no	2	0.020438	86.872	50159000
ACFCDDHTR	K	9	0	1180.44	NM_014487#(-t:4_Z2014507675705);tr|E9PDK6|E9PDK6_HUMAN;NM_014487#(-s-:4_Z9413172878728);sp|Q9Y3S2|ZN330_HUMAN;NM_014487#(f-:4_Z5425128155728);NM_014487#(f-:4_Z1959861291087);tr|D6RBR7|D6RBR7_HUMAN	NM_014487#(-t:4_Z2014507675705)	yes	no	3	0.061673	48.091	1251300
ACFCLLEGDK	R	10	0	1211.53	sp|Q6PD62|CTR9_HUMAN;NM_014633#(-s-:11_C9258048514824);NM_014633#(-s-:11_C235111535596);NM_014633#(-s-:11_C4883996490641);NM_014633#(-s-:11_C2483280215213);NM_014633#(-s-s-:11_C906100389116);NM_014633#(-s-:11_C9853800720904);NM_014633#(-s-s-s-:11_C8173243451698);NM_014633#(-s-s-:11_C725887994462);NM_014633#(-s-s-:11_C8295484519371);NM_014633#(-s-:11_C5607780791953);NM_014633#(-s-s-s-:11_C35083469…	sp|Q6PD62|CTR9_HUMAN	yes	no	2	0.0058156	54.259	5116900
ACFDCGAK	K	8	0	927.358	sp|Q8N6H7|ARFG2_HUMAN;NM_032389#(f-t:11_A9007924046024);NM_032389#(-t:11_A6220658720950);NM_032389#(r:11_A5290036681183);NM_032389#(-s-:11_A7162710050367);tr|G5E9L0|G5E9L0_HUMAN;NM_032389#(-s-:11_A5709864017587);NM_032389#(-t:11_A3133275573299);NM_032389#(r:11_A971813610452);NM_032389#(-s-s-:11_A3517087749984);tr|E9PQP3|E9PQP3_HUMAN;tr|E9PIY6|E9PIY6_HUMAN;NM_032389#(-t:11_A6890774768568);tr|E9PMU…	sp|Q8N6H7|ARFG2_HUMAN	no	no	2	0.015339	62.107	1213000
ACFGAENLMR	K	10	0	1167.52	NM_019067#(-s-:X_G6179908365532);NM_019067#(-s-:X_G2072798242629);NM_019067#(f-:X_G3386066887458);NM_019067#(-t:X_G3067801174227);sp|Q9NVN8|GNL3L_HUMAN;NM_019067#(-s-s-s-:X_G3725520968228);NM_019067#(-s-s-:X_G6670506284822);NM_019067#(-s-s-:X_G9445907071506);NM_019067#(-s-:X_G9330109856875);NM_019067#(-s-s-s-s-:X_G4229725925741);NM_019067#(-s-:X_G7231338625490);NM_019067#(-s-:X_G3036880901636);NM…	NM_019067#(-s-:X_G6179908365532)	yes	no	2	0.0015748	67.334	55407000
ACFGTFLPEEK	K	11	0	1297.6	sp|Q9NRP4|ACN9_HUMAN;NM_020186#(-s-:7_A5365168935377)	sp|Q9NRP4|ACN9_HUMAN	yes	no	2	0.0023085	66.267	3093400
ACFHCETCK	K	9	0	1211.45	NM_006148#(-t:17_L527100910046);sp|Q14847|LASP1_HUMAN;NM_006148#(f-T:17_L4397150072525);NM_006148#(f-:17_L8261020406455);NM_006148#(-t:17_L1954342030761);sp|Q14847-2|LASP1_HUMAN;NM_006148#(-t:17_L8673122250309);tr|F6S2S5|F6S2S5_HUMAN;tr|K7ESD6|K7ESD6_HUMAN	NM_006148#(-t:17_L527100910046)	yes	no	2,3	1.1383e-05	135.86	874920000
ACFLGATVK	K	9	0	965.5	sp|Q9H9P8|L2HDH_HUMAN;tr|C9JVN9|C9JVN9_HUMAN;sp|Q9H9P8-2|L2HDH_HUMAN	sp|Q9H9P8|L2HDH_HUMAN	yes	no	2	0.005621	66.568	33304000
ACFLMAHNGWVMGDDPLR	K	18	0	2088.93	sp|P35573|GDE_HUMAN;sp|P35573-2|GDE_HUMAN;sp|P35573-3|GDE_HUMAN	sp|P35573|GDE_HUMAN	yes	no	3	1.4635e-06	73.928	1173400
ACFLYFK	K	7	0	947.458	sp|Q14534|ERG1_HUMAN;tr|E7EVQ6|E7EVQ6_HUMAN;tr|H0YBN7|H0YBN7_HUMAN	sp|Q14534|ERG1_HUMAN	yes	no	2	0.023275	75.311	40519000
ACFPTNIVTLCHSIA	K	15	0	1702.82	NM_032499#(-s-:15_C919742766311);NM_001130010#(f-:15_C9753495002973);sp|Q9Y2V0|CO041_HUMAN;NM_001130010#(f-T:15_C6945778370339);NM_001130010#(-t:15_C1867840398317);tr|H3BS01|H3BS01_HUMAN;sp|Q9Y2V0-2|CO041_HUMAN;tr|H3BMD3|H3BMD3_HUMAN	NM_032499#(-s-:15_C919742766311)	yes	no	2	0.0019215	41.621	1412100
ACFQVGTSEEMK	K	12	0	1385.6	sp|P35658-2|NU214_HUMAN;sp|P35658-4|NU214_HUMAN;sp|P35658|NU214_HUMAN;sp|P35658-3|NU214_HUMAN;sp|P35658-5|NU214_HUMAN;NM_005085#(-t:9_N3014304407895);NM_005085#(-s-s-:9_N9257601338418);NM_005085#(-s-:9_N6955004479384);NM_005085#(-s-:9_N1878201017575);NM_005085#(-s-s-s-:9_N4172882942762);NM_005085#(-s-s-:9_N7244891573150);NM_005085#(-s-:9_N3086199358444);NM_005085#(f-:9_N7325913664200)	sp|P35658-2|NU214_HUMAN	yes	no	2	1.5148e-11	134.75	13845000
ACFSANGEEVLATSTHSK	K	18	0	1907.87	sp|Q9Y5J1|UTP18_HUMAN;NM_016001#(-s-:17_U2962069793019);NM_016001#(r:17_U9122855253842);NM_016001#(-s-:17_U9610437641191);tr|J3KSR7|J3KSR7_HUMAN	sp|Q9Y5J1|UTP18_HUMAN	yes	no	3	9.1101e-55	184.2	82515000
ACFTMDPK	R	8	0	968.41	NM_006295#(-s-:6_V8182826889598);sp|P26640|SYVC_HUMAN;NM_006295#(r:6_V9056324370519);NM_006295#(r:6_V7400074234572);NM_006295#(-s-s-:6_V3920643264486);NM_006295#(-s-:6_V6624901368038);NM_006295#(-s-:6_V8514538969654);tr|B0V043|B0V043_HUMAN;NM_006295#(-s-s-s-:6_V482308456168);NM_006295#(-s-s-:6_V3910920557540);NM_006295#(-s-s-:6_V9530260762355);NM_006295#(-s-:6_V429328149341);NM_006295#(-s-s-s-s-:…	NM_006295#(-s-:6_V8182826889598)	yes	no	2	0.015875	60.436	375030000
ACFTQWLCHLHNEVNR	R	16	0	2083.95	sp|P55789|ALR_HUMAN;sp|P55789-2|ALR_HUMAN;tr|H3BQQ4|H3BQQ4_HUMAN	sp|P55789|ALR_HUMAN	yes	no	3,4	5.1632e-24	123.02	93489000
ACFVGLIESPEGTEELK	K	17	0	1877.91	NM_001079518#(f-:17_M4762243312487);NM_014815#(f-:17_M4762243312487);sp|O75448-2|MED24_HUMAN;NM_014815#(f-:17_M4143671636201);sp|O75448|MED24_HUMAN;NM_001079518#(-t:17_M7412274804304);NM_001079518#(f-:17_M3985194499223);NM_014815#(-t:17_M5776255733286);NM_001079518#(-s-s-:17_M8840892728478);NM_001079518#(-s-S-:17_M3759119941112);NM_014815#(-s-s-:17_M8840892728478);tr|F8W9R9|F8W9R9_HUMAN;NM_001079…	NM_001079518#(f-:17_M4762243312487)	no	no	2,3	7.5331e-20	117	26246000
ACFYNLDK	K	8	0	1029.46	sp|Q96I25|SPF45_HUMAN	sp|Q96I25|SPF45_HUMAN	yes	yes	2	0.0020196	114.28	412920000
ACFYNLDKFR	K	10	1	1332.63	sp|Q96I25|SPF45_HUMAN	sp|Q96I25|SPF45_HUMAN	yes	yes	3	0.0037089	72.848	2778800
ACGADSYEMEEDGVR	R	15	0	1687.65	sp|P00533|EGFR_HUMAN;tr|E9PFD7|E9PFD7_HUMAN;tr|Q504U8|Q504U8_HUMAN;sp|P00533-4|EGFR_HUMAN;sp|P00533-3|EGFR_HUMAN;sp|P00533-2|EGFR_HUMAN	sp|P00533|EGFR_HUMAN	yes	no	2,3	7.1472e-36	210.14	56873000
[truncated: 140,740 more rows]
